# Supplementary material for: Slower Ship Speed in the Bahamas Due to COVID-19 Produces a Dramatic Reduction in Ocean Sound Levels
Source: Frontiers journal article supplement (doi:10.3389/fmars.2021.673565), 2021-07-26
Supplement: Table_1.XLSX [file Table_1.XLSX]

## Sheet: SPL
SPL pre-COVID-19	Date	Time				SPL during-COVID-19	Date	Time
84.405	20191029	00:00 - 00:10				86.67	20200601	13:00 - 13:10
83.875	20191029	01:00 - 01:10	mean	88.8064		89.555	20200601	14:00 - 14:10	mean	84.2695		difference	4.53685
84.365	20191029	02:00 - 02:10				87.24	20200601	15:00 - 15:10
84.275	20191029	03:00 - 03:10				89.48	20200601	16:00 - 16:10
82.64	20191029	04:00 - 04:10				86.99	20200601	17:00 - 17:10
83.04	20191029	05:00 - 05:10				88.59	20200601	18:00 - 18:10
88.07	20191029	06:00 - 06:10				86.41	20200601	19:00 - 19:10
84.765	20191029	07:00 - 07:10				85.705	20200601	20:00 - 20:10
85.8	20191029	08:00 - 08:10				83.54	20200601	21:00 - 21:10
86.7	20191029	09:00 - 09:10				83.855	20200601	22:00 - 22:10
83.07	20191029	10:00 - 10:10				82.48	20200601	23:00 - 23:10
84.315	20191029	11:00 - 11:10				85	20200602	00:00 - 00:10
83.845	20191029	12:00 - 12:10				90.345	20200602	01:00 - 01:10
83.47	20191029	13:00 - 13:10				83.22	20200602	02:00 - 02:10
83.405	20191029	14:00 - 14:10				82.625	20200602	03:00 - 03:10
86.035	20191029	15:00 - 15:10				86.24	20200602	04:00 - 04:10
84.37	20191029	16:00 - 16:10				85.41	20200602	05:00 - 05:10
85.265	20191029	17:00 - 17:10				87.675	20200602	06:00 - 06:10
85.8	20191029	18:00 - 18:10				85.985	20200602	07:00 - 07:10
84.045	20191029	19:00 - 19:10				86.165	20200602	08:00 - 08:10
85.2	20191029	20:00 - 20:10				86.41	20200602	09:00 - 09:10
85.05	20191029	21:00 - 21:10				88.145	20200602	10:00 - 10:10
86.79	20191029	22:00 - 22:10				86.18	20200602	11:00 - 11:10
84.585	20191029	23:00 - 23:10				91.03	20200602	12:00 - 12:10
85.495	20191030	00:00 - 00:10				86.78	20200602	13:00 - 13:10
84.71	20191030	01:00 - 01:10				91.21	20200602	14:00 - 14:10
84.765	20191030	02:00 - 02:10				90.945	20200602	15:00 - 15:10
89.61	20191030	03:00 - 03:10				88.525	20200602	16:00 - 16:10
84.4	20191030	04:00 - 04:10				89.815	20200602	17:00 - 17:10
81.965	20191030	05:00 - 05:10				89.17	20200602	18:00 - 18:10
84.735	20191030	06:00 - 06:10				88.515	20200602	19:00 - 19:10
84.35	20191030	07:00 - 07:10				89.845	20200602	20:00 - 20:10
86.46	20191030	08:00 - 08:10				88.985	20200602	21:00 - 21:10
82.1	20191030	09:00 - 09:10				87.895	20200602	22:00 - 22:10
85.135	20191030	10:00 - 10:10				85.635	20200602	23:00 - 23:10
83.725	20191030	11:00 - 11:10				84.915	20200603	00:00 - 00:10
82.655	20191030	12:00 - 12:10				84.68	20200603	01:00 - 01:10
82.105	20191030	13:00 - 13:10				84.52	20200603	02:00 - 02:10
81.375	20191030	14:00 - 14:10				84.545	20200603	03:00 - 03:10
81.875	20191030	15:00 - 15:10				86.405	20200603	04:00 - 04:10
84.215	20191030	16:00 - 16:10				86.235	20200603	05:00 - 05:10
84.36	20191030	17:00 - 17:10				88.83	20200603	06:00 - 06:10
91.865	20191030	18:00 - 18:10				87.605	20200603	07:00 - 07:10
85.05	20191030	19:00 - 19:10				84.89	20200603	08:00 - 08:10
85.245	20191030	20:00 - 20:10				86.13	20200603	09:00 - 09:10
84.82	20191030	21:00 - 21:10				90.26	20200603	10:00 - 10:10
86.58	20191030	22:00 - 22:10				88.09	20200603	11:00 - 11:10
87.45	20191030	23:00 - 23:10				85.415	20200603	12:00 - 12:10
85.2	20191031	00:00 - 00:10				84.52	20200603	13:00 - 13:10
86.155	20191031	01:00 - 01:10				87.31	20200603	14:00 - 14:10
88.15	20191031	02:00 - 02:10				84.14	20200603	15:00 - 15:10
88.075	20191031	03:00 - 03:10				85.065	20200603	16:00 - 16:10
84.385	20191031	04:00 - 04:10				84.505	20200603	17:00 - 17:10
82.81	20191031	05:00 - 05:10				85.765	20200603	18:00 - 18:10
83.365	20191031	06:00 - 06:10				85.115	20200603	19:00 - 19:10
81.535	20191031	07:00 - 07:10				85.71	20200603	20:00 - 20:10
84.585	20191031	08:00 - 08:10				86.24	20200603	21:00 - 21:10
84.56	20191031	09:00 - 09:10				86.065	20200603	22:00 - 22:10
87.155	20191031	10:00 - 10:10				84.24	20200603	23:00 - 23:10
87.045	20191031	11:00 - 11:10				86.215	20200604	00:00 - 00:10
86.005	20191031	12:00 - 12:10				85.62	20200604	01:00 - 01:10
84.26	20191031	13:00 - 13:10				85.045	20200604	02:00 - 02:10
83.9	20191031	14:00 - 14:10				93.485	20200604	03:00 - 03:10
85.555	20191031	15:00 - 15:10				90.22	20200604	04:00 - 04:10
83.43	20191031	16:00 - 16:10				88.555	20200604	05:00 - 05:10
84.75	20191031	17:00 - 17:10				91.965	20200604	06:00 - 06:10
85.76	20191031	18:00 - 18:10				86.165	20200604	07:00 - 07:10
84.675	20191031	19:00 - 19:10				88.44	20200604	08:00 - 08:10
85.985	20191031	20:00 - 20:10				83.27	20200604	09:00 - 09:10
89.395	20191031	21:00 - 21:10				85.11	20200604	10:00 - 10:10
91.355	20191031	22:00 - 22:10				84.04	20200604	11:00 - 11:10
87.805	20191031	23:00 - 23:10				85.39	20200604	12:00 - 12:10
82.84	20191101	00:00 - 00:10				83.22	20200604	13:00 - 13:10
81.52	20191101	01:00 - 01:10				82.455	20200604	14:00 - 14:10
85.39	20191101	02:00 - 02:10				82.23	20200604	15:00 - 15:10
85.005	20191101	03:00 - 03:10				82.185	20200604	16:00 - 16:10
85.195	20191101	04:00 - 04:10				83.345	20200604	17:00 - 17:10
87.005	20191101	05:00 - 05:10				88.285	20200604	18:00 - 18:10
84.195	20191101	06:00 - 06:10				86.285	20200604	19:00 - 19:10
82.205	20191101	07:00 - 07:10				87.645	20200604	20:00 - 20:10
83.59	20191101	08:00 - 08:10				86.595	20200604	21:00 - 21:10
87.48	20191101	09:00 - 09:10				84.955	20200604	22:00 - 22:10
93.915	20191101	10:00 - 10:10				86.05	20200604	23:00 - 23:10
91.485	20191101	11:00 - 11:10				88.625	20200605	00:00 - 00:10
88.715	20191101	12:00 - 12:10				90.46	20200605	01:00 - 01:10
84.185	20191101	13:00 - 13:10				85.65	20200605	02:00 - 02:10
84.175	20191101	14:00 - 14:10				86.865	20200605	03:00 - 03:10
82.75	20191101	15:00 - 15:10				87.645	20200605	04:00 - 04:10
84.75	20191101	16:00 - 16:10				92.415	20200605	05:00 - 05:10
83.85	20191101	17:00 - 17:10				87.135	20200605	06:00 - 06:10
86.67	20191101	18:00 - 18:10				83.315	20200605	07:00 - 07:10
87.935	20191101	19:00 - 19:10				82.365	20200605	08:00 - 08:10
87.06	20191101	20:00 - 20:10				83.935	20200605	09:00 - 09:10
86.5	20191101	21:00 - 21:10				82.55	20200605	10:00 - 10:10
85.63	20191101	22:00 - 22:10				85.38	20200605	11:00 - 11:10
88.69	20191101	23:00 - 23:10				84.15	20200605	12:00 - 12:10
85.18	20191102	00:00 - 00:10				83.59	20200605	13:00 - 13:10
92.655	20191102	01:00 - 01:10				88.835	20200605	14:00 - 14:10
89.875	20191102	02:00 - 02:10				83.725	20200605	15:00 - 15:10
83.5	20191102	03:00 - 03:10				84.755	20200605	16:00 - 16:10
85.205	20191102	04:00 - 04:10				84.495	20200605	17:00 - 17:10
85.485	20191102	05:00 - 05:10				84.205	20200605	18:00 - 18:10
88.37	20191102	06:00 - 06:10				86.33	20200605	19:00 - 19:10
87.92	20191102	07:00 - 07:10				83.44	20200605	20:00 - 20:10
84.71	20191102	08:00 - 08:10				87.72	20200605	21:00 - 21:10
83.12	20191102	09:00 - 09:10				86.825	20200605	22:00 - 22:10
82.975	20191102	10:00 - 10:10				86.89	20200605	23:00 - 23:10
85.285	20191102	11:00 - 11:10				85.36	20200606	00:00 - 00:10
88.745	20191102	12:00 - 12:10				85.52	20200606	01:00 - 01:10
84.47	20191102	13:00 - 13:10				85.385	20200606	02:00 - 02:10
86.4	20191102	14:00 - 14:10				86.49	20200606	03:00 - 03:10
86.19	20191102	15:00 - 15:10				86.36	20200606	04:00 - 04:10
83.415	20191102	16:00 - 16:10				89.67	20200606	05:00 - 05:10
83.895	20191102	17:00 - 17:10				87.36	20200606	06:00 - 06:10
84.035	20191102	18:00 - 18:10				87.405	20200606	07:00 - 07:10
87.3	20191102	19:00 - 19:10				86.195	20200606	08:00 - 08:10
87.93	20191102	20:00 - 20:10				84.505	20200606	09:00 - 09:10
83.29	20191102	21:00 - 21:10				86.03	20200606	10:00 - 10:10
82.945	20191102	22:00 - 22:10				85.245	20200606	11:00 - 11:10
83.985	20191102	23:00 - 23:10				85.22	20200606	12:00 - 12:10
84.205	20191103	00:00 - 00:10				84.34	20200606	13:00 - 13:10
89.46	20191103	01:00 - 01:10				85.26	20200606	14:00 - 14:10
88.305	20191103	02:00 - 02:10				89.185	20200606	15:00 - 15:10
84.915	20191103	03:00 - 03:10				85.545	20200606	16:00 - 16:10
83.94	20191103	04:00 - 04:10				85.845	20200606	17:00 - 17:10
84.905	20191103	05:00 - 05:10				86.345	20200606	18:00 - 18:10
85.35	20191103	06:00 - 06:10				86.975	20200606	19:00 - 19:10
87.685	20191103	07:00 - 07:10				89.63	20200606	20:00 - 20:10
86.785	20191103	08:00 - 08:10				90.7	20200606	21:00 - 21:10
83.38	20191103	09:00 - 09:10				87.285	20200606	22:00 - 22:10
86.505	20191103	10:00 - 10:10				85.91	20200606	23:00 - 23:10
81.61	20191103	11:00 - 11:10				87.855	20200607	00:00 - 00:10
85.28	20191103	12:00 - 12:10				88.36	20200607	01:00 - 01:10
82.325	20191103	13:00 - 13:10				92.085	20200607	02:00 - 02:10
84.71	20191103	14:00 - 14:10				86.175	20200607	03:00 - 03:10
84.56	20191103	15:00 - 15:10				87.76	20200607	04:00 - 04:10
85.285	20191103	16:00 - 16:10				86.505	20200607	05:00 - 05:10
86.855	20191103	17:00 - 17:10				85.12	20200607	06:00 - 06:10
85.39	20191103	18:00 - 18:10				83.115	20200607	07:00 - 07:10
86.855	20191103	19:00 - 19:10				85.845	20200607	08:00 - 08:10
89.195	20191103	20:00 - 20:10				86.26	20200607	09:00 - 09:10
84.955	20191103	21:00 - 21:10				85.845	20200607	10:00 - 10:10
88.18	20191103	22:00 - 22:10				87.45	20200607	11:00 - 11:10
85.59	20191103	23:00 - 23:10				86.77	20200607	12:00 - 12:10
87.015	20191104	00:00 - 00:10				84.725	20200607	13:00 - 13:10
90.21	20191104	01:00 - 01:10				83.275	20200607	14:00 - 14:10
86.16	20191104	02:00 - 02:10				83.715	20200607	15:00 - 15:10
92.33	20191104	03:00 - 03:10				82.37	20200607	16:00 - 16:10
88.56	20191104	04:00 - 04:10				86.865	20200607	17:00 - 17:10
87.055	20191104	05:00 - 05:10				89.17	20200607	18:00 - 18:10
86.12	20191104	06:00 - 06:10				88.125	20200607	19:00 - 19:10
85.525	20191104	07:00 - 07:10				87.205	20200607	20:00 - 20:10
86.985	20191104	08:00 - 08:10				92.66	20200607	21:00 - 21:10
90.205	20191104	09:00 - 09:10				88.22	20200607	22:00 - 22:10
84.77	20191104	10:00 - 10:10				86.965	20200607	23:00 - 23:10
82.445	20191104	11:00 - 11:10				89.965	20200608	00:00 - 00:10
83.225	20191104	12:00 - 12:10				86.41	20200608	01:00 - 01:10
86.475	20191104	13:00 - 13:10				86.26	20200608	02:00 - 02:10
85.94	20191104	14:00 - 14:10				94.74	20200608	03:00 - 03:10
82.42	20191104	15:00 - 15:10				86.445	20200608	04:00 - 04:10
86.8	20191104	16:00 - 16:10				90.45	20200608	05:00 - 05:10
85.605	20191104	17:00 - 17:10				85.49	20200608	06:00 - 06:10
90.265	20191104	18:00 - 18:10				84.535	20200608	07:00 - 07:10
83.625	20191104	19:00 - 19:10				83.11	20200608	08:00 - 08:10
83.225	20191104	20:00 - 20:10				84.215	20200608	09:00 - 09:10
85.095	20191104	21:00 - 21:10				84.525	20200608	10:00 - 10:10
87.04	20191104	22:00 - 22:10				86.6	20200608	11:00 - 11:10
93.205	20191104	23:00 - 23:10				86.005	20200608	12:00 - 12:10
85.97	20191105	00:00 - 00:10				82.62	20200608	13:00 - 13:10
88.835	20191105	01:00 - 01:10				82.03	20200608	14:00 - 14:10
85.54	20191105	02:00 - 02:10				80.915	20200608	15:00 - 15:10
87.125	20191105	03:00 - 03:10				82.215	20200608	16:00 - 16:10
84.89	20191105	04:00 - 04:10				83.695	20200608	17:00 - 17:10
85.175	20191105	05:00 - 05:10				83.88	20200608	18:00 - 18:10
87.41	20191105	06:00 - 06:10				82.99	20200608	19:00 - 19:10
89.595	20191105	07:00 - 07:10				87.675	20200608	20:00 - 20:10
88.845	20191105	08:00 - 08:10				95.565	20200608	21:00 - 21:10
85.185	20191105	09:00 - 09:10				86.86	20200608	22:00 - 22:10
94.38	20191105	10:00 - 10:10				88.11	20200608	23:00 - 23:10
87.745	20191105	11:00 - 11:10				84.54	20200609	00:00 - 00:10
92.85	20191105	12:00 - 12:10				84.775	20200609	01:00 - 01:10
84.58	20191105	13:00 - 13:10				90.095	20200609	02:00 - 02:10
87.595	20191105	14:00 - 14:10				85.37	20200609	03:00 - 03:10
89.255	20191105	15:00 - 15:10				85.57	20200609	04:00 - 04:10
86.73	20191105	16:00 - 16:10				87.24	20200609	05:00 - 05:10
86.26	20191105	17:00 - 17:10				80.555	20200609	06:00 - 06:10
84.875	20191105	18:00 - 18:10				82.35	20200609	07:00 - 07:10
84.385	20191105	19:00 - 19:10				81.15	20200609	08:00 - 08:10
86.57	20191105	20:00 - 20:10				83.11	20200609	09:00 - 09:10
83.285	20191105	21:00 - 21:10				83.405	20200609	10:00 - 10:10
85.59	20191105	22:00 - 22:10				83.745	20200609	11:00 - 11:10
87.97	20191105	23:00 - 23:10				84.335	20200609	12:00 - 12:10
87.425	20191106	00:00 - 00:10				84.82	20200609	13:00 - 13:10
85.035	20191106	01:00 - 01:10				84.455	20200609	14:00 - 14:10
82.385	20191106	02:00 - 02:10				86.14	20200609	15:00 - 15:10
82.455	20191106	03:00 - 03:10				85.605	20200609	16:00 - 16:10
83.285	20191106	04:00 - 04:10				86.355	20200609	17:00 - 17:10
88.69	20191106	05:00 - 05:10				88.04	20200609	18:00 - 18:10
86.24	20191106	06:00 - 06:10				85.01	20200609	19:00 - 19:10
84.615	20191106	07:00 - 07:10				84.685	20200609	20:00 - 20:10
84.3	20191106	08:00 - 08:10				92.325	20200609	21:00 - 21:10
88.43	20191106	09:00 - 09:10				91.12	20200609	22:00 - 22:10
83.825	20191106	10:00 - 10:10				86.85	20200609	23:00 - 23:10
83.83	20191106	11:00 - 11:10				86.8	20200610	00:00 - 00:10
85.005	20191106	12:00 - 12:10				85.07	20200610	01:00 - 01:10
85.775	20191106	13:00 - 13:10				83.205	20200610	02:00 - 02:10
87.06	20191106	14:00 - 14:10				86.19	20200610	03:00 - 03:10
86.01	20191106	15:00 - 15:10				85.125	20200610	04:00 - 04:10
86.88	20191106	16:00 - 16:10				88.37	20200610	05:00 - 05:10
86.09	20191106	17:00 - 17:10				86.88	20200610	06:00 - 06:10
88.115	20191106	18:00 - 18:10				82.795	20200610	07:00 - 07:10
87.58	20191106	19:00 - 19:10				83.945	20200610	08:00 - 08:10
85.975	20191106	20:00 - 20:10				83.005	20200610	09:00 - 09:10
83.005	20191106	21:00 - 21:10				83.455	20200610	10:00 - 10:10
84.71	20191106	22:00 - 22:10				85.315	20200610	11:00 - 11:10
86.005	20191106	23:00 - 23:10				89.56	20200610	12:00 - 12:10
87.56	20191107	00:00 - 00:10				88.5	20200610	13:00 - 13:10
87.705	20191107	01:00 - 01:10				90.63	20200610	14:00 - 14:10
84.23	20191107	02:00 - 02:10				85.335	20200610	15:00 - 15:10
85.655	20191107	03:00 - 03:10				84.155	20200610	16:00 - 16:10
83.44	20191107	04:00 - 04:10				87.315	20200610	17:00 - 17:10
87.66	20191107	05:00 - 05:10				86.395	20200610	18:00 - 18:10
87.765	20191107	06:00 - 06:10				85.825	20200610	19:00 - 19:10
90.275	20191107	07:00 - 07:10				85.865	20200610	20:00 - 20:10
88.885	20191107	08:00 - 08:10				91.19	20200610	21:00 - 21:10
87.62	20191107	09:00 - 09:10				88.325	20200610	22:00 - 22:10
87.32	20191107	10:00 - 10:10				85.785	20200610	23:00 - 23:10
83.825	20191107	11:00 - 11:10				84.825	20200611	00:00 - 00:10
85.58	20191107	12:00 - 12:10				85.055	20200611	01:00 - 01:10
86.75	20191107	13:00 - 13:10				82.48	20200611	02:00 - 02:10
86.95	20191107	14:00 - 14:10				85.13	20200611	03:00 - 03:10
94.63	20191107	15:00 - 15:10				84.025	20200611	04:00 - 04:10
90.86	20191107	16:00 - 16:10				83.83	20200611	05:00 - 05:10
90.245	20191107	17:00 - 17:10				81.665	20200611	06:00 - 06:10
93.88	20191107	18:00 - 18:10				82.305	20200611	07:00 - 07:10
92.47	20191107	19:00 - 19:10				81.31	20200611	08:00 - 08:10
92.13	20191107	20:00 - 20:10				84.555	20200611	09:00 - 09:10
88.4	20191107	21:00 - 21:10				84.695	20200611	10:00 - 10:10
87.29	20191107	22:00 - 22:10				84.69	20200611	11:00 - 11:10
88.845	20191107	23:00 - 23:10				86.115	20200611	12:00 - 12:10
85.36	20191108	00:00 - 00:10				86.435	20200611	13:00 - 13:10
86.815	20191108	01:00 - 01:10				84.85	20200611	14:00 - 14:10
85.235	20191108	02:00 - 02:10				84.535	20200611	15:00 - 15:10
85.945	20191108	03:00 - 03:10				83.56	20200611	16:00 - 16:10
85.16	20191108	04:00 - 04:10				83.49	20200611	17:00 - 17:10
85.615	20191108	05:00 - 05:10				85.115	20200611	18:00 - 18:10
93.255	20191108	06:00 - 06:10				83.495	20200611	19:00 - 19:10
89.39	20191108	07:00 - 07:10				83.62	20200611	20:00 - 20:10
86.29	20191108	08:00 - 08:10				91.655	20200611	21:00 - 21:10
85.675	20191108	09:00 - 09:10				85.785	20200611	22:00 - 22:10
84.46	20191108	10:00 - 10:10				86.095	20200611	23:00 - 23:10
86.42	20191108	11:00 - 11:10				84.3	20200612	00:00 - 00:10
84.495	20191108	12:00 - 12:10				83.165	20200612	01:00 - 01:10
83.455	20191108	13:00 - 13:10				82.205	20200612	02:00 - 02:10
85.475	20191108	14:00 - 14:10				85.375	20200612	03:00 - 03:10
86.395	20191108	15:00 - 15:10				83.33	20200612	04:00 - 04:10
84.935	20191108	16:00 - 16:10				85.94	20200612	05:00 - 05:10
87.325	20191108	17:00 - 17:10				89.605	20200612	06:00 - 06:10
95.24	20191108	18:00 - 18:10				88.085	20200612	07:00 - 07:10
93.245	20191108	19:00 - 19:10				87.32	20200612	08:00 - 08:10
87.86	20191108	20:00 - 20:10				83.605	20200612	09:00 - 09:10
86.055	20191108	21:00 - 21:10				87.075	20200612	10:00 - 10:10
90.59	20191108	22:00 - 22:10				85.255	20200612	11:00 - 11:10
86.2	20191108	23:00 - 23:10				89.785	20200612	12:00 - 12:10
89.4	20191109	00:00 - 00:10				93.675	20200612	13:00 - 13:10
84.855	20191109	01:00 - 01:10				89.145	20200612	14:00 - 14:10
92.155	20191109	02:00 - 02:10				88.415	20200612	15:00 - 15:10
86.05	20191109	03:00 - 03:10				84.225	20200612	16:00 - 16:10
90.475	20191109	04:00 - 04:10				86.865	20200612	17:00 - 17:10
89.14	20191109	05:00 - 05:10				83.23	20200612	18:00 - 18:10
89.855	20191109	06:00 - 06:10				84.22	20200612	19:00 - 19:10
87.565	20191109	07:00 - 07:10				84.645	20200612	20:00 - 20:10
88.7	20191109	08:00 - 08:10				91.245	20200612	21:00 - 21:10
88.34	20191109	09:00 - 09:10				84.63	20200612	22:00 - 22:10
87.425	20191109	10:00 - 10:10				84.725	20200612	23:00 - 23:10
88.255	20191109	11:00 - 11:10				83.02	20200613	00:00 - 00:10
93.025	20191109	12:00 - 12:10				86.06	20200613	01:00 - 01:10
94.15	20191109	13:00 - 13:10				84.79	20200613	02:00 - 02:10
91.71	20191109	14:00 - 14:10				86.62	20200613	03:00 - 03:10
89.99	20191109	15:00 - 15:10				83.11	20200613	04:00 - 04:10
88.175	20191109	16:00 - 16:10				84.29	20200613	05:00 - 05:10
86.815	20191109	17:00 - 17:10				84.2	20200613	06:00 - 06:10
88.105	20191109	18:00 - 18:10				83.75	20200613	07:00 - 07:10
87.66	20191109	19:00 - 19:10				87.22	20200613	08:00 - 08:10
86.88	20191109	20:00 - 20:10				84.88	20200613	09:00 - 09:10
86.765	20191109	21:00 - 21:10				83.325	20200613	10:00 - 10:10
87.11	20191109	22:00 - 22:10				82.555	20200613	11:00 - 11:10
86.275	20191109	23:00 - 23:10				83.205	20200613	12:00 - 12:10
91.375	20191110	00:00 - 00:10				81.68	20200613	13:00 - 13:10
89.77	20191110	01:00 - 01:10				82.865	20200613	14:00 - 14:10
98.135	20191110	02:00 - 02:10				84.335	20200613	15:00 - 15:10
87.835	20191110	03:00 - 03:10				87.185	20200613	16:00 - 16:10
87.785	20191110	04:00 - 04:10				84.575	20200613	17:00 - 17:10
88.1	20191110	05:00 - 05:10				86.19	20200613	18:00 - 18:10
87.705	20191110	06:00 - 06:10				83.365	20200613	19:00 - 19:10
88.06	20191110	07:00 - 07:10				82.4	20200613	20:00 - 20:10
89.895	20191110	08:00 - 08:10				90.33	20200613	21:00 - 21:10
87.13	20191110	09:00 - 09:10				91.03	20200613	22:00 - 22:10
89.455	20191110	10:00 - 10:10				84.475	20200613	23:00 - 23:10
91.13	20191110	11:00 - 11:10				83.03	20200614	00:00 - 00:10
86.465	20191110	12:00 - 12:10				83.48	20200614	01:00 - 01:10
85.905	20191110	13:00 - 13:10				87.395	20200614	02:00 - 02:10
89.095	20191110	14:00 - 14:10				85.685	20200614	03:00 - 03:10
86.37	20191110	15:00 - 15:10				85.49	20200614	04:00 - 04:10
86.405	20191110	16:00 - 16:10				84.29	20200614	05:00 - 05:10
86.875	20191110	17:00 - 17:10				84.645	20200614	06:00 - 06:10
88.12	20191110	18:00 - 18:10				83.105	20200614	07:00 - 07:10
89.375	20191110	19:00 - 19:10				87.64	20200614	08:00 - 08:10
92.33	20191110	20:00 - 20:10				85.975	20200614	09:00 - 09:10
86.82	20191110	21:00 - 21:10				84.71	20200614	10:00 - 10:10
86.34	20191110	22:00 - 22:10				83.505	20200614	11:00 - 11:10
84.525	20191110	23:00 - 23:10				86.97	20200614	12:00 - 12:10
86.955	20191111	00:00 - 00:10				87.165	20200614	13:00 - 13:10
89.81	20191111	01:00 - 01:10				86.34	20200614	14:00 - 14:10
90.085	20191111	02:00 - 02:10				87.055	20200614	15:00 - 15:10
88.245	20191111	03:00 - 03:10				84.84	20200614	16:00 - 16:10
91.455	20191111	04:00 - 04:10				86.99	20200614	17:00 - 17:10
87.45	20191111	05:00 - 05:10				86.645	20200614	18:00 - 18:10
86.435	20191111	06:00 - 06:10				85.385	20200614	19:00 - 19:10
89.225	20191111	07:00 - 07:10				86.61	20200614	20:00 - 20:10
84.44	20191111	08:00 - 08:10				89.745	20200614	21:00 - 21:10
88.61	20191111	09:00 - 09:10				85.865	20200614	22:00 - 22:10
86.46	20191111	10:00 - 10:10				84.175	20200614	23:00 - 23:10
87.555	20191111	11:00 - 11:10				82.015	20200615	00:00 - 00:10
86.265	20191111	12:00 - 12:10				81.185	20200615	01:00 - 01:10
86.36	20191111	13:00 - 13:10				84.62	20200615	02:00 - 02:10
88.67	20191111	14:00 - 14:10				81.57	20200615	03:00 - 03:10
85.72	20191111	15:00 - 15:10				82.775	20200615	04:00 - 04:10
89.4	20191111	16:00 - 16:10				82.66	20200615	05:00 - 05:10
90.15	20191111	17:00 - 17:10				84.21	20200615	06:00 - 06:10
93.835	20191111	18:00 - 18:10				83.64	20200615	07:00 - 07:10
86.775	20191111	19:00 - 19:10				83.445	20200615	08:00 - 08:10
87.285	20191111	20:00 - 20:10				85.145	20200615	09:00 - 09:10
87.315	20191111	21:00 - 21:10				82.54	20200615	10:00 - 10:10
87.48	20191111	22:00 - 22:10				81.895	20200615	11:00 - 11:10
88.61	20191111	23:00 - 23:10				82.18	20200615	12:00 - 12:10
86.565	20191112	00:00 - 00:10				82.66	20200615	13:00 - 13:10
82.925	20191112	01:00 - 01:10				84.96	20200615	14:00 - 14:10
85.13	20191112	02:00 - 02:10				85.625	20200615	15:00 - 15:10
84.585	20191112	03:00 - 03:10				84.685	20200615	16:00 - 16:10
86.115	20191112	04:00 - 04:10				83.745	20200615	17:00 - 17:10
85.365	20191112	05:00 - 05:10				83.225	20200615	18:00 - 18:10
86.875	20191112	06:00 - 06:10				86.73	20200615	19:00 - 19:10
90.455	20191112	07:00 - 07:10				84.31	20200615	20:00 - 20:10
85.26	20191112	08:00 - 08:10				90.785	20200615	21:00 - 21:10
84.99	20191112	09:00 - 09:10				86.99	20200615	22:00 - 22:10
84.3	20191112	10:00 - 10:10				85.025	20200615	23:00 - 23:10
85.155	20191112	11:00 - 11:10				86.185	20200616	00:00 - 00:10
85.385	20191112	12:00 - 12:10				82.86	20200616	01:00 - 01:10
85.865	20191112	13:00 - 13:10				82.27	20200616	02:00 - 02:10
93.87	20191112	14:00 - 14:10				81.93	20200616	03:00 - 03:10
87.315	20191112	15:00 - 15:10				83.87	20200616	04:00 - 04:10
93.635	20191112	16:00 - 16:10				82.695	20200616	05:00 - 05:10
85.745	20191112	17:00 - 17:10				80.82	20200616	06:00 - 06:10
87.96	20191112	18:00 - 18:10				84.38	20200616	07:00 - 07:10
85.07	20191112	19:00 - 19:10				87.825	20200616	08:00 - 08:10
87.47	20191112	20:00 - 20:10				82.455	20200616	09:00 - 09:10
92.15	20191112	21:00 - 21:10				82.97	20200616	10:00 - 10:10
87.89	20191112	22:00 - 22:10				81.945	20200616	11:00 - 11:10
88.085	20191112	23:00 - 23:10				83.425	20200616	12:00 - 12:10
86.685	20191113	00:00 - 00:10				88.64	20200616	13:00 - 13:10
88.555	20191113	01:00 - 01:10				87.455	20200616	14:00 - 14:10
86.675	20191113	02:00 - 02:10				85.26	20200616	15:00 - 15:10
88.19	20191113	03:00 - 03:10				84.815	20200616	16:00 - 16:10
85.995	20191113	04:00 - 04:10				88.4	20200616	17:00 - 17:10
86.07	20191113	05:00 - 05:10				84.12	20200616	18:00 - 18:10
86.505	20191113	06:00 - 06:10				83.225	20200616	19:00 - 19:10
86.64	20191113	07:00 - 07:10				87.17	20200616	20:00 - 20:10
85.16	20191113	08:00 - 08:10				91.55	20200616	21:00 - 21:10
88.41	20191113	09:00 - 09:10				86.885	20200616	22:00 - 22:10
90.92	20191113	10:00 - 10:10				83.02	20200616	23:00 - 23:10
89.325	20191113	11:00 - 11:10				87.595	20200617	00:00 - 00:10
86.725	20191113	12:00 - 12:10				83.315	20200617	01:00 - 01:10
89.94	20191113	13:00 - 13:10				82.6	20200617	02:00 - 02:10
87.6	20191113	14:00 - 14:10				83.47	20200617	03:00 - 03:10
84.88	20191113	15:00 - 15:10				82.905	20200617	04:00 - 04:10
88.635	20191113	16:00 - 16:10				87.05	20200617	05:00 - 05:10
90.08	20191113	17:00 - 17:10				85.85	20200617	06:00 - 06:10
90.1	20191113	18:00 - 18:10				82.24	20200617	07:00 - 07:10
88.085	20191113	19:00 - 19:10				85.85	20200617	08:00 - 08:10
86.045	20191113	20:00 - 20:10				83.69	20200617	09:00 - 09:10
85.905	20191113	21:00 - 21:10				86.035	20200617	10:00 - 10:10
89.34	20191113	22:00 - 22:10				90.58	20200617	11:00 - 11:10
88.485	20191113	23:00 - 23:10				87.14	20200617	12:00 - 12:10
87.925	20191114	00:00 - 00:10				89.39	20200617	13:00 - 13:10
86.405	20191114	01:00 - 01:10				86.23	20200617	14:00 - 14:10
92.07	20191114	02:00 - 02:10				87.095	20200617	15:00 - 15:10
87.65	20191114	03:00 - 03:10				84.45	20200617	16:00 - 16:10
90.005	20191114	04:00 - 04:10				85.315	20200617	17:00 - 17:10
89.41	20191114	05:00 - 05:10				84.875	20200617	18:00 - 18:10
90.58	20191114	06:00 - 06:10				85.89	20200617	19:00 - 19:10
86.325	20191114	07:00 - 07:10				84.905	20200617	20:00 - 20:10
90.36	20191114	08:00 - 08:10				91.64	20200617	21:00 - 21:10
90.435	20191114	09:00 - 09:10				88.195	20200617	22:00 - 22:10
87.865	20191114	10:00 - 10:10				89.575	20200617	23:00 - 23:10
85.885	20191114	11:00 - 11:10				82.42	20200618	00:00 - 00:10
85.745	20191114	12:00 - 12:10				87.03	20200618	01:00 - 01:10
87.345	20191114	13:00 - 13:10				82.4	20200618	02:00 - 02:10
87.225	20191114	14:00 - 14:10				85.915	20200618	03:00 - 03:10
85.795	20191114	15:00 - 15:10				80.935	20200618	04:00 - 04:10
87.135	20191114	16:00 - 16:10				81.85	20200618	05:00 - 05:10
89.125	20191114	17:00 - 17:10				84.29	20200618	06:00 - 06:10
87.71	20191114	18:00 - 18:10				82.95	20200618	07:00 - 07:10
87.535	20191114	19:00 - 19:10				82.07	20200618	08:00 - 08:10
88.055	20191114	20:00 - 20:10				84.425	20200618	09:00 - 09:10
93.845	20191114	21:00 - 21:10				80.14	20200618	10:00 - 10:10
88.25	20191114	22:00 - 22:10				81.645	20200618	11:00 - 11:10
88.695	20191114	23:00 - 23:10				89.41	20200618	12:00 - 12:10
85.635	20191115	00:00 - 00:10				88.28	20200618	13:00 - 13:10
83.95	20191115	01:00 - 01:10				93.365	20200618	14:00 - 14:10
83.605	20191115	02:00 - 02:10				83.975	20200618	15:00 - 15:10
83.065	20191115	03:00 - 03:10				83.17	20200618	16:00 - 16:10
83.535	20191115	04:00 - 04:10				83.545	20200618	17:00 - 17:10
85.095	20191115	05:00 - 05:10				86.72	20200618	18:00 - 18:10
93.255	20191115	06:00 - 06:10				83.05	20200618	19:00 - 19:10
87.41	20191115	07:00 - 07:10				84.745	20200618	20:00 - 20:10
89.35	20191115	08:00 - 08:10				88.82	20200618	21:00 - 21:10
89.25	20191115	09:00 - 09:10				89.915	20200618	22:00 - 22:10
94.785	20191115	10:00 - 10:10				92.19	20200618	23:00 - 23:10
84.63	20191115	11:00 - 11:10				87.16	20200619	00:00 - 00:10
88.245	20191115	12:00 - 12:10				83.635	20200619	01:00 - 01:10
84.985	20191115	13:00 - 13:10				84.9	20200619	02:00 - 02:10
83.73	20191115	14:00 - 14:10				86.005	20200619	03:00 - 03:10
87.915	20191115	15:00 - 15:10				87.135	20200619	04:00 - 04:10
89.08	20191115	16:00 - 16:10				84.6	20200619	05:00 - 05:10
89.38	20191115	17:00 - 17:10				86.815	20200619	06:00 - 06:10
87.33	20191115	18:00 - 18:10				87.17	20200619	07:00 - 07:10
87.185	20191115	19:00 - 19:10				84.835	20200619	08:00 - 08:10
87.84	20191115	20:00 - 20:10				81.66	20200619	09:00 - 09:10
87.935	20191115	21:00 - 21:10				82.07	20200619	10:00 - 10:10
88.105	20191115	22:00 - 22:10				87.375	20200619	11:00 - 11:10
93.36	20191115	23:00 - 23:10				82.92	20200619	12:00 - 12:10
86.42	20191116	00:00 - 00:10				83.66	20200619	13:00 - 13:10
88.23	20191116	01:00 - 01:10				83.985	20200619	14:00 - 14:10
87.435	20191116	02:00 - 02:10				85.24	20200619	15:00 - 15:10
85.165	20191116	03:00 - 03:10				83.61	20200619	16:00 - 16:10
87.26	20191116	04:00 - 04:10				83.775	20200619	17:00 - 17:10
89.675	20191116	05:00 - 05:10				83.42	20200619	18:00 - 18:10
89.895	20191116	06:00 - 06:10				82.995	20200619	19:00 - 19:10
87.79	20191116	07:00 - 07:10				84.99	20200619	20:00 - 20:10
87.27	20191116	08:00 - 08:10				89.3	20200619	21:00 - 21:10
86.28	20191116	09:00 - 09:10				90.695	20200619	22:00 - 22:10
88.195	20191116	10:00 - 10:10				87.07	20200619	23:00 - 23:10
85.06	20191116	11:00 - 11:10				93.17	20200620	00:00 - 00:10
88.31	20191116	12:00 - 12:10				84.08	20200620	01:00 - 01:10
92.485	20191116	13:00 - 13:10				83.67	20200620	02:00 - 02:10
89.35	20191116	14:00 - 14:10				82.755	20200620	03:00 - 03:10
86.4	20191116	15:00 - 15:10				82.86	20200620	04:00 - 04:10
86.66	20191116	16:00 - 16:10				82.86	20200620	05:00 - 05:10
89.33	20191116	17:00 - 17:10				85	20200620	06:00 - 06:10
87.405	20191116	18:00 - 18:10				86.34	20200620	07:00 - 07:10
86.22	20191116	19:00 - 19:10				84.31	20200620	08:00 - 08:10
86.945	20191116	20:00 - 20:10				82.46	20200620	09:00 - 09:10
87.155	20191116	21:00 - 21:10				86.23	20200620	10:00 - 10:10
85.89	20191116	22:00 - 22:10				81.845	20200620	11:00 - 11:10
84.875	20191116	23:00 - 23:10				85.945	20200620	12:00 - 12:10
89.025	20191117	00:00 - 00:10				84.825	20200620	13:00 - 13:10
93.11	20191117	01:00 - 01:10				86.3	20200620	14:00 - 14:10
88.47	20191117	02:00 - 02:10				85.3	20200620	15:00 - 15:10
86.41	20191117	03:00 - 03:10				84.595	20200620	16:00 - 16:10
93.17	20191117	04:00 - 04:10				82.135	20200620	17:00 - 17:10
87.495	20191117	05:00 - 05:10				88.695	20200620	18:00 - 18:10
87.51	20191117	06:00 - 06:10				83.56	20200620	19:00 - 19:10
86.58	20191117	07:00 - 07:10				84.92	20200620	20:00 - 20:10
84.94	20191117	08:00 - 08:10				87.345	20200620	21:00 - 21:10
85.335	20191117	09:00 - 09:10				82.975	20200620	22:00 - 22:10
88.95	20191117	10:00 - 10:10				87.35	20200620	23:00 - 23:10
89.44	20191117	11:00 - 11:10				82.675	20200621	00:00 - 00:10
87.835	20191117	12:00 - 12:10				83.06	20200621	01:00 - 01:10
87.955	20191117	13:00 - 13:10				81.925	20200621	02:00 - 02:10
90.235	20191117	14:00 - 14:10				82.16	20200621	03:00 - 03:10
87.98	20191117	15:00 - 15:10				83.02	20200621	04:00 - 04:10
86.075	20191117	16:00 - 16:10				82.925	20200621	05:00 - 05:10
87.43	20191117	17:00 - 17:10				81.445	20200621	06:00 - 06:10
92.9	20191117	18:00 - 18:10				81.77	20200621	07:00 - 07:10
89.77	20191117	19:00 - 19:10				83.66	20200621	08:00 - 08:10
86.125	20191117	20:00 - 20:10				82.58	20200621	09:00 - 09:10
85.485	20191117	21:00 - 21:10				83.24	20200621	10:00 - 10:10
85.16	20191117	22:00 - 22:10				83.255	20200621	11:00 - 11:10
87.05	20191117	23:00 - 23:10				83.45	20200621	12:00 - 12:10
87.415	20191118	00:00 - 00:10				82.58	20200621	13:00 - 13:10
88.115	20191118	01:00 - 01:10				82.665	20200621	14:00 - 14:10
87.025	20191118	02:00 - 02:10				82.525	20200621	15:00 - 15:10
86.985	20191118	03:00 - 03:10				83.09	20200621	16:00 - 16:10
87.335	20191118	04:00 - 04:10				84.395	20200621	17:00 - 17:10
85.35	20191118	05:00 - 05:10				84.225	20200621	18:00 - 18:10
84.53	20191118	06:00 - 06:10				84.245	20200621	19:00 - 19:10
90.85	20191118	07:00 - 07:10				84.845	20200621	20:00 - 20:10
87.98	20191118	08:00 - 08:10				88.73	20200621	21:00 - 21:10
87.62	20191118	09:00 - 09:10				91.285	20200621	22:00 - 22:10
85.305	20191118	10:00 - 10:10				87.23	20200621	23:00 - 23:10
89.445	20191118	11:00 - 11:10				87.415	20200622	00:00 - 00:10
87.255	20191118	12:00 - 12:10				86.535	20200622	01:00 - 01:10
92.2	20191118	13:00 - 13:10				90.61	20200622	02:00 - 02:10
90.435	20191118	14:00 - 14:10				85.78	20200622	03:00 - 03:10
86.3	20191118	15:00 - 15:10				90.97	20200622	04:00 - 04:10
88.1	20191118	16:00 - 16:10				87.815	20200622	05:00 - 05:10
90.56	20191118	17:00 - 17:10				86.09	20200622	06:00 - 06:10
88.54	20191118	18:00 - 18:10				86.33	20200622	07:00 - 07:10
87.725	20191118	19:00 - 19:10				87.47	20200622	08:00 - 08:10
87.695	20191118	20:00 - 20:10				85.975	20200622	09:00 - 09:10
86.65	20191118	21:00 - 21:10				86.07	20200622	10:00 - 10:10
87.375	20191118	22:00 - 22:10				85.695	20200622	11:00 - 11:10
88.545	20191118	23:00 - 23:10				85.995	20200622	12:00 - 12:10
87.64	20191119	00:00 - 00:10				85.68	20200622	13:00 - 13:10
85.905	20191119	01:00 - 01:10				85.61	20200622	14:00 - 14:10
86.635	20191119	02:00 - 02:10				86.86	20200622	15:00 - 15:10
92.36	20191119	03:00 - 03:10				87.06	20200622	16:00 - 16:10
88.005	20191119	04:00 - 04:10				87.48	20200622	17:00 - 17:10
89.155	20191119	05:00 - 05:10				90.61	20200622	18:00 - 18:10
86.985	20191119	06:00 - 06:10				88.05	20200622	19:00 - 19:10
92.23	20191119	07:00 - 07:10				87.585	20200622	20:00 - 20:10
86.475	20191119	08:00 - 08:10				90.17	20200622	21:00 - 21:10
85.37	20191119	09:00 - 09:10				87.54	20200622	22:00 - 22:10
88.565	20191119	10:00 - 10:10				87.555	20200622	23:00 - 23:10
88.61	20191119	11:00 - 11:10				87.15	20200623	00:00 - 00:10
86.7	20191119	12:00 - 12:10				87.715	20200623	01:00 - 01:10
85.96	20191119	13:00 - 13:10				87.78	20200623	02:00 - 02:10
85.83	20191119	14:00 - 14:10				88.08	20200623	03:00 - 03:10
88.555	20191119	15:00 - 15:10				87.78	20200623	04:00 - 04:10
90.17	20191119	16:00 - 16:10				88.235	20200623	05:00 - 05:10
88.5	20191119	17:00 - 17:10				87.73	20200623	06:00 - 06:10
87.415	20191119	18:00 - 18:10				87.155	20200623	07:00 - 07:10
89.1	20191119	19:00 - 19:10				87.8	20200623	08:00 - 08:10
89.565	20191119	20:00 - 20:10				88.585	20200623	09:00 - 09:10
90.39	20191119	21:00 - 21:10				88.96	20200623	10:00 - 10:10
94.515	20191119	22:00 - 22:10				91.08	20200623	11:00 - 11:10
90.205	20191119	23:00 - 23:10				90.345	20200623	12:00 - 12:10
86.81	20191120	00:00 - 00:10				91.545	20200623	13:00 - 13:10
84.54	20191120	01:00 - 01:10				91.185	20200623	14:00 - 14:10
84.595	20191120	02:00 - 02:10				90.085	20200623	15:00 - 15:10
87.25	20191120	03:00 - 03:10				92.895	20200623	16:00 - 16:10
88.375	20191120	04:00 - 04:10				89.795	20200623	17:00 - 17:10
83.195	20191120	05:00 - 05:10				89.755	20200623	18:00 - 18:10
85.02	20191120	06:00 - 06:10				92.545	20200623	19:00 - 19:10
87.455	20191120	07:00 - 07:10				92.305	20200623	20:00 - 20:10
83.245	20191120	08:00 - 08:10				92.75	20200623	21:00 - 21:10
83.4	20191120	09:00 - 09:10				90.12	20200623	22:00 - 22:10
85.295	20191120	10:00 - 10:10				89.875	20200623	23:00 - 23:10
87.78	20191120	11:00 - 11:10				89.76	20200624	00:00 - 00:10
84.71	20191120	12:00 - 12:10				89.96	20200624	01:00 - 01:10
89.14	20191120	13:00 - 13:10				89.795	20200624	02:00 - 02:10
94.34	20191120	14:00 - 14:10				89.385	20200624	03:00 - 03:10
91.745	20191120	15:00 - 15:10				88.41	20200624	04:00 - 04:10
90.505	20191120	16:00 - 16:10				89.37	20200624	05:00 - 05:10
89.34	20191120	17:00 - 17:10				89.28	20200624	06:00 - 06:10
86.44	20191120	18:00 - 18:10				89.62	20200624	07:00 - 07:10
88.855	20191120	19:00 - 19:10				88.155	20200624	08:00 - 08:10
86.795	20191120	20:00 - 20:10				88.52	20200624	09:00 - 09:10
86.22	20191120	21:00 - 21:10				87.625	20200624	10:00 - 10:10
93.805	20191120	22:00 - 22:10				87.57	20200624	11:00 - 11:10
91.415	20191120	23:00 - 23:10				88.405	20200624	12:00 - 12:10
84.585	20191121	00:00 - 00:10				87.54	20200624	13:00 - 13:10
85.575	20191121	01:00 - 01:10				87.735	20200624	14:00 - 14:10
87.875	20191121	02:00 - 02:10				87.245	20200624	15:00 - 15:10
88.36	20191121	03:00 - 03:10				88.86	20200624	16:00 - 16:10
90.94	20191121	04:00 - 04:10				86.93	20200624	17:00 - 17:10
87.48	20191121	05:00 - 05:10				86.815	20200624	18:00 - 18:10
87.845	20191121	06:00 - 06:10				87.255	20200624	19:00 - 19:10
86.64	20191121	07:00 - 07:10				87.74	20200624	20:00 - 20:10
83.94	20191121	08:00 - 08:10				91.25	20200624	21:00 - 21:10
86.34	20191121	09:00 - 09:10				90.85	20200624	22:00 - 22:10
88.305	20191121	10:00 - 10:10				89.685	20200624	23:00 - 23:10
86.95	20191121	11:00 - 11:10				86.255	20200625	00:00 - 00:10
86.59	20191121	12:00 - 12:10				85.93	20200625	01:00 - 01:10
89.94	20191121	13:00 - 13:10				85.615	20200625	02:00 - 02:10
92.745	20191121	14:00 - 14:10				86.01	20200625	03:00 - 03:10
92.485	20191121	15:00 - 15:10				85.69	20200625	04:00 - 04:10
92.355	20191121	16:00 - 16:10				87.545	20200625	05:00 - 05:10
90.69	20191121	17:00 - 17:10				86.83	20200625	06:00 - 06:10
88.46	20191121	18:00 - 18:10				88.1	20200625	07:00 - 07:10
91.565	20191121	19:00 - 19:10				90.87	20200625	08:00 - 08:10
92.625	20191121	20:00 - 20:10				90.735	20200625	09:00 - 09:10
86.44	20191121	21:00 - 21:10				89.09	20200625	10:00 - 10:10
92.99	20191121	22:00 - 22:10				87.135	20200625	11:00 - 11:10
86.7	20191121	23:00 - 23:10				86.495	20200625	12:00 - 12:10
84.21	20191122	00:00 - 00:10				87.52	20200625	13:00 - 13:10
84.515	20191122	01:00 - 01:10				92.205	20200625	14:00 - 14:10
87.465	20191122	02:00 - 02:10				89.12	20200625	15:00 - 15:10
90.41	20191122	03:00 - 03:10				85.92	20200625	16:00 - 16:10
87.31	20191122	04:00 - 04:10				85.16	20200625	17:00 - 17:10
87.27	20191122	05:00 - 05:10				84.84	20200625	18:00 - 18:10
87.15	20191122	06:00 - 06:10				85.375	20200625	19:00 - 19:10
88.15	20191122	07:00 - 07:10				88.305	20200625	20:00 - 20:10
88.05	20191122	08:00 - 08:10				89.68	20200625	21:00 - 21:10
86.465	20191122	09:00 - 09:10				87.445	20200625	22:00 - 22:10
86.16	20191122	10:00 - 10:10				86.77	20200625	23:00 - 23:10
85.88	20191122	11:00 - 11:10				87.905	20200626	00:00 - 00:10
86.565	20191122	12:00 - 12:10				85.965	20200626	01:00 - 01:10
89.32	20191122	13:00 - 13:10				86.38	20200626	02:00 - 02:10
95.9	20191122	14:00 - 14:10				85.91	20200626	03:00 - 03:10
90.39	20191122	15:00 - 15:10				85.425	20200626	04:00 - 04:10
92.425	20191122	16:00 - 16:10				87.595	20200626	05:00 - 05:10
90.305	20191122	17:00 - 17:10				89.775	20200626	06:00 - 06:10
89.55	20191122	18:00 - 18:10				86.925	20200626	07:00 - 07:10
90.175	20191122	19:00 - 19:10				86.585	20200626	08:00 - 08:10
90.215	20191122	20:00 - 20:10				85.57	20200626	09:00 - 09:10
88.99	20191122	21:00 - 21:10				85.335	20200626	10:00 - 10:10
86.61	20191122	22:00 - 22:10				86.845	20200626	11:00 - 11:10
83.66	20191122	23:00 - 23:10				88.125	20200626	12:00 - 12:10
82.67	20191123	00:00 - 00:10				86.65	20200626	13:00 - 13:10
81.86	20191123	01:00 - 01:10				87.19	20200626	14:00 - 14:10
84.025	20191123	02:00 - 02:10				85.285	20200626	15:00 - 15:10
83.57	20191123	03:00 - 03:10				84.89	20200626	16:00 - 16:10
86.645	20191123	04:00 - 04:10				84.665	20200626	17:00 - 17:10
87.025	20191123	05:00 - 05:10				85.385	20200626	18:00 - 18:10
87.58	20191123	06:00 - 06:10				86.325	20200626	19:00 - 19:10
85.76	20191123	07:00 - 07:10				86.775	20200626	20:00 - 20:10
88.65	20191123	08:00 - 08:10				86.63	20200626	21:00 - 21:10
91.445	20191123	09:00 - 09:10				88.325	20200626	22:00 - 22:10
91.165	20191123	10:00 - 10:10				86.175	20200626	23:00 - 23:10
90.005	20191123	11:00 - 11:10				85.375	20200627	00:00 - 00:10
89.585	20191123	12:00 - 12:10				85.505	20200627	01:00 - 01:10
88.71	20191123	13:00 - 13:10				85.61	20200627	02:00 - 02:10
89.545	20191123	14:00 - 14:10				86.345	20200627	03:00 - 03:10
90.57	20191123	15:00 - 15:10				85.465	20200627	04:00 - 04:10
92.415	20191123	16:00 - 16:10				85.255	20200627	05:00 - 05:10
91.19	20191123	17:00 - 17:10				85.625	20200627	06:00 - 06:10
89.445	20191123	18:00 - 18:10				85.65	20200627	07:00 - 07:10
88.5	20191123	19:00 - 19:10				88.2	20200627	08:00 - 08:10
85.245	20191123	20:00 - 20:10				89.825	20200627	09:00 - 09:10
85.615	20191123	21:00 - 21:10				84.74	20200627	10:00 - 10:10
84.19	20191123	22:00 - 22:10				84.75	20200627	11:00 - 11:10
84.555	20191123	23:00 - 23:10				87.715	20200627	12:00 - 12:10
86.98	20191124	00:00 - 00:10				85.02	20200627	13:00 - 13:10
85.565	20191124	01:00 - 01:10				91.725	20200627	14:00 - 14:10
86.76	20191124	02:00 - 02:10				90.43	20200627	15:00 - 15:10
91.4	20191124	03:00 - 03:10				86.96	20200627	16:00 - 16:10
90.875	20191124	04:00 - 04:10				86.265	20200627	17:00 - 17:10
90.24	20191124	05:00 - 05:10				85.295	20200627	18:00 - 18:10
89.795	20191124	06:00 - 06:10				86.725	20200627	19:00 - 19:10
87.285	20191124	07:00 - 07:10				86.445	20200627	20:00 - 20:10
87.64	20191124	08:00 - 08:10				86.8	20200627	21:00 - 21:10
87.77	20191124	09:00 - 09:10				85.985	20200627	22:00 - 22:10
86.88	20191124	10:00 - 10:10				85.965	20200627	23:00 - 23:10
88.105	20191124	11:00 - 11:10				86.265	20200628	00:00 - 00:10
88.475	20191124	12:00 - 12:10				85.865	20200628	01:00 - 01:10
90.005	20191124	13:00 - 13:10				85.145	20200628	02:00 - 02:10
90.125	20191124	14:00 - 14:10				84.55	20200628	04:00 - 04:10
93.93	20191124	15:00 - 15:10				84.53	20200628	05:00 - 05:10
93.425	20191124	16:00 - 16:10				85.43	20200628	06:00 - 06:10
91.215	20191124	17:00 - 17:10				85.21	20200628	07:00 - 07:10
89.345	20191124	18:00 - 18:10				84.625	20200628	08:00 - 08:10
90.93	20191124	19:00 - 19:10				83.91	20200628	09:00 - 09:10
91.04	20191124	20:00 - 20:10				90.29	20200628	10:00 - 10:10
87.075	20191124	21:00 - 21:10				90.165	20200628	11:00 - 11:10
89.125	20191124	22:00 - 22:10				85.35	20200628	12:00 - 12:10
91.405	20191124	23:00 - 23:10				86.94	20200628	13:00 - 13:10
85.99	20191125	00:00 - 00:10				85.44	20200628	14:00 - 14:10
87.72	20191125	01:00 - 01:10				84.27	20200628	15:00 - 15:10
89.765	20191125	02:00 - 02:10				85.975	20200628	16:00 - 16:10
89.35	20191125	03:00 - 03:10				83.89	20200628	17:00 - 17:10
90.09	20191125	04:00 - 04:10				85.185	20200628	18:00 - 18:10
88.71	20191125	05:00 - 05:10				85.19	20200628	19:00 - 19:10
91.89	20191125	06:00 - 06:10				85.56	20200628	20:00 - 20:10
86.455	20191125	07:00 - 07:10				86.655	20200628	21:00 - 21:10
86.895	20191125	08:00 - 08:10				85.47	20200628	22:00 - 22:10
85.16	20191125	09:00 - 09:10				84.49	20200628	23:00 - 23:10
89.78	20191125	10:00 - 10:10				84	20200629	00:00 - 00:10
92.915	20191125	11:00 - 11:10				85.855	20200629	01:00 - 01:10
87.785	20191125	12:00 - 12:10				85.495	20200629	02:00 - 02:10
95.395	20191125	13:00 - 13:10				85.425	20200629	03:00 - 03:10
90.94	20191125	14:00 - 14:10				85.385	20200629	04:00 - 04:10
98.945	20191125	15:00 - 15:10				86.39	20200629	05:00 - 05:10
93.67	20191125	16:00 - 16:10				85.925	20200629	06:00 - 06:10
90.175	20191125	17:00 - 17:10				85.3	20200629	07:00 - 07:10
87.33	20191125	18:00 - 18:10				85.305	20200629	08:00 - 08:10
86.15	20191125	19:00 - 19:10				84.595	20200629	09:00 - 09:10
85.275	20191125	20:00 - 20:10				85.18	20200629	10:00 - 10:10
86.5	20191125	21:00 - 21:10				84.965	20200629	11:00 - 11:10
86.405	20191125	22:00 - 22:10				84.57	20200629	12:00 - 12:10
87.005	20191125	23:00 - 23:10				86.04	20200629	13:00 - 13:10
92.875	20191126	00:00 - 00:10				85.78	20200629	14:00 - 14:10
92.795	20191126	01:00 - 01:10				85.025	20200629	15:00 - 15:10
88.87	20191126	02:00 - 02:10				85.985	20200629	16:00 - 16:10
88.725	20191126	03:00 - 03:10				84.185	20200629	17:00 - 17:10
86.75	20191126	04:00 - 04:10				85.34	20200629	18:00 - 18:10
86.79	20191126	05:00 - 05:10				85.175	20200629	19:00 - 19:10
87.37	20191126	06:00 - 06:10				84.35	20200629	20:00 - 20:10
85.95	20191126	07:00 - 07:10				85.67	20200629	21:00 - 21:10
88.03	20191126	08:00 - 08:10				83.41	20200629	22:00 - 22:10
89.865	20191126	09:00 - 09:10				83.395	20200629	23:00 - 23:10
86.345	20191126	10:00 - 10:10				82.635	20200630	00:00 - 00:10
90.085	20191126	11:00 - 11:10				90.485	20200630	01:00 - 01:10
87.085	20191126	12:00 - 12:10				83.9	20200630	02:00 - 02:10
87.405	20191126	13:00 - 13:10				82.765	20200630	03:00 - 03:10
90.61	20191126	14:00 - 14:10				83.175	20200630	04:00 - 04:10
95.815	20191126	15:00 - 15:10				84.205	20200630	05:00 - 05:10
91.77	20191126	16:00 - 16:10				84.245	20200630	06:00 - 06:10
89.605	20191126	17:00 - 17:10				83.125	20200630	07:00 - 07:10
86.58	20191126	18:00 - 18:10				82.255	20200630	08:00 - 08:10
83.765	20191126	19:00 - 19:10				84.245	20200630	09:00 - 09:10
87.695	20191126	20:00 - 20:10				84.635	20200630	10:00 - 10:10
91.875	20191126	21:00 - 21:10				82.255	20200630	11:00 - 11:10
94.875	20191126	22:00 - 22:10				82.06	20200630	12:00 - 12:10
88.51	20191126	23:00 - 23:10				85.545	20200630	13:00 - 13:10
90.5	20191127	00:00 - 00:10				83.79	20200630	14:00 - 14:10
86.485	20191127	01:00 - 01:10				84.58	20200630	15:00 - 15:10
84.605	20191127	02:00 - 02:10				84.385	20200630	16:00 - 16:10
88.14	20191127	03:00 - 03:10				83.235	20200630	17:00 - 17:10
92.98	20191127	04:00 - 04:10				84.285	20200630	18:00 - 18:10
86.935	20191127	05:00 - 05:10				86.24	20200630	19:00 - 19:10
85.065	20191127	06:00 - 06:10				84.06	20200630	20:00 - 20:10
88.895	20191127	07:00 - 07:10				84.42	20200630	21:00 - 21:10
92.74	20191127	08:00 - 08:10				82.54	20200630	22:00 - 22:10
95.685	20191127	09:00 - 09:10				83.215	20200630	23:00 - 23:10
86.835	20191127	10:00 - 10:10				81.62	20200701	00:00 - 00:10
86.69	20191127	11:00 - 11:10				81.78	20200701	01:00 - 01:10
86.84	20191127	12:00 - 12:10				81.67	20200701	02:00 - 02:10
87.425	20191127	13:00 - 13:10				82.41	20200701	03:00 - 03:10
89.59	20191127	14:00 - 14:10				85.435	20200701	04:00 - 04:10
96.46	20191127	15:00 - 15:10				90.52	20200701	05:00 - 05:10
95.91	20191127	16:00 - 16:10				87.34	20200701	06:00 - 06:10
93.355	20191127	17:00 - 17:10				83.94	20200701	07:00 - 07:10
85.775	20191127	18:00 - 18:10				83.95	20200701	08:00 - 08:10
88.795	20191127	19:00 - 19:10				85.895	20200701	09:00 - 09:10
89.045	20191127	20:00 - 20:10				83.285	20200701	10:00 - 10:10
88.46	20191127	21:00 - 21:10				86.23	20200701	11:00 - 11:10
84.77	20191127	22:00 - 22:10				85.13	20200701	12:00 - 12:10
87.165	20191127	23:00 - 23:10				88.26	20200701	13:00 - 13:10
86.015	20191128	00:00 - 00:10				85.085	20200701	14:00 - 14:10
85.035	20191128	01:00 - 01:10				86.605	20200701	15:00 - 15:10
84.185	20191128	02:00 - 02:10				83.32	20200701	16:00 - 16:10
83.695	20191128	03:00 - 03:10				87.29	20200701	17:00 - 17:10
87.225	20191128	04:00 - 04:10				84.73	20200701	18:00 - 18:10
85.715	20191128	05:00 - 05:10				85.315	20200701	19:00 - 19:10
89.87	20191128	06:00 - 06:10				87.115	20200701	20:00 - 20:10
85.64	20191128	07:00 - 07:10				84.395	20200701	21:00 - 21:10
86.86	20191128	08:00 - 08:10				83.64	20200701	22:00 - 22:10
87.35	20191128	09:00 - 09:10				83.055	20200701	23:00 - 23:10
83.72	20191128	10:00 - 10:10				84.11	20200702	00:00 - 00:10
83.745	20191128	11:00 - 11:10				84.875	20200702	01:00 - 01:10
84.77	20191128	12:00 - 12:10				82.48	20200702	02:00 - 02:10
86.065	20191128	13:00 - 13:10				82.42	20200702	03:00 - 03:10
85.495	20191128	14:00 - 14:10				83.445	20200702	04:00 - 04:10
88.63	20191128	15:00 - 15:10				84.75	20200702	05:00 - 05:10
91.835	20191128	16:00 - 16:10				89.07	20200702	06:00 - 06:10
84.995	20191128	17:00 - 17:10				84.78	20200702	07:00 - 07:10
89.755	20191128	18:00 - 18:10				84.46	20200702	08:00 - 08:10
86.97	20191128	19:00 - 19:10				83.24	20200702	09:00 - 09:10
91.5	20191128	20:00 - 20:10				85.23	20200702	10:00 - 10:10
92.535	20191128	21:00 - 21:10				87.46	20200702	11:00 - 11:10
90.68	20191128	22:00 - 22:10				84.75	20200702	12:00 - 12:10
87.89	20191128	23:00 - 23:10				84.01	20200702	13:00 - 13:10
88.085	20191129	00:00 - 00:10				82.625	20200702	14:00 - 14:10
84.27	20191129	01:00 - 01:10				84.36	20200702	15:00 - 15:10
84.53	20191129	02:00 - 02:10				83.43	20200702	16:00 - 16:10
87.7	20191129	03:00 - 03:10				84.265	20200702	17:00 - 17:10
89.525	20191129	04:00 - 04:10				92.715	20200702	18:00 - 18:10
86.69	20191129	05:00 - 05:10				87.26	20200702	19:00 - 19:10
90.755	20191129	06:00 - 06:10				83.79	20200702	20:00 - 20:10
86.725	20191129	07:00 - 07:10				84.84	20200702	21:00 - 21:10
84.515	20191129	08:00 - 08:10				82.51	20200702	22:00 - 22:10
84.32	20191129	09:00 - 09:10				81.99	20200702	23:00 - 23:10
87.775	20191129	10:00 - 10:10				81.825	20200703	00:00 - 00:10
83.55	20191129	11:00 - 11:10				80.615	20200703	01:00 - 01:10
85.405	20191129	12:00 - 12:10				81.305	20200703	02:00 - 02:10
83.4	20191129	13:00 - 13:10				84.8	20200703	03:00 - 03:10
84.12	20191129	14:00 - 14:10				82.205	20200703	04:00 - 04:10
87.895	20191129	15:00 - 15:10				82.17	20200703	05:00 - 05:10
87.88	20191129	16:00 - 16:10				86.7	20200703	06:00 - 06:10
89.9	20191129	17:00 - 17:10				83.975	20200703	07:00 - 07:10
88.19	20191129	18:00 - 18:10				82.175	20200703	08:00 - 08:10
86.825	20191129	19:00 - 19:10				82.06	20200703	09:00 - 09:10
92.25	20191129	20:00 - 20:10				81.925	20200703	10:00 - 10:10
89.48	20191129	21:00 - 21:10				82.425	20200703	11:00 - 11:10
88.75	20191129	22:00 - 22:10				82.72	20200703	12:00 - 12:10
86.13	20191129	23:00 - 23:10				86.025	20200703	13:00 - 13:10
88.545	20191130	00:00 - 00:10				87.115	20200703	14:00 - 14:10
90.135	20191130	01:00 - 01:10				83.125	20200703	15:00 - 15:10
84.365	20191130	02:00 - 02:10				85.5	20200703	16:00 - 16:10
91.925	20191130	03:00 - 03:10				86.255	20200703	17:00 - 17:10
85.78	20191130	04:00 - 04:10				82.57	20200703	18:00 - 18:10
84	20191130	05:00 - 05:10				90.54	20200703	19:00 - 19:10
89.665	20191130	06:00 - 06:10				84.065	20200703	20:00 - 20:10
87.62	20191130	07:00 - 07:10				84.14	20200703	21:00 - 21:10
94.685	20191130	08:00 - 08:10				81.915	20200703	22:00 - 22:10
89.62	20191130	09:00 - 09:10				81.165	20200703	23:00 - 23:10
86.71	20191130	10:00 - 10:10				80.56	20200704	00:00 - 00:10
83.19	20191130	11:00 - 11:10				85.925	20200704	01:00 - 01:10
86.41	20191130	12:00 - 12:10				80.72	20200704	02:00 - 02:10
83.02	20191130	13:00 - 13:10				81.275	20200704	03:00 - 03:10
83.015	20191130	14:00 - 14:10				85.51	20200704	04:00 - 04:10
85.21	20191130	15:00 - 15:10				83.54	20200704	05:00 - 05:10
96.625	20191130	16:00 - 16:10				85.995	20200704	06:00 - 06:10
88.945	20191130	17:00 - 17:10				84.225	20200704	07:00 - 07:10
89.485	20191130	18:00 - 18:10				82.82	20200704	08:00 - 08:10
87.53	20191130	19:00 - 19:10				83.15	20200704	09:00 - 09:10
88.61	20191130	20:00 - 20:10				82.895	20200704	10:00 - 10:10
86.8	20191130	21:00 - 21:10				83.44	20200704	11:00 - 11:10
84.105	20191130	22:00 - 22:10				83.6	20200704	12:00 - 12:10
84.535	20191130	23:00 - 23:10				81.28	20200704	13:00 - 13:10
90.09	20191201	00:00 - 00:10				81.27	20200704	14:00 - 14:10
87.62	20191201	01:00 - 01:10				80.905	20200704	15:00 - 15:10
89.75	20191201	02:00 - 02:10				82.3	20200704	16:00 - 16:10
90.58	20191201	03:00 - 03:10				82.79	20200704	17:00 - 17:10
87.715	20191201	04:00 - 04:10				85.12	20200704	18:00 - 18:10
87.74	20191201	05:00 - 05:10				86.83	20200704	19:00 - 19:10
85.34	20191201	06:00 - 06:10				83.23	20200704	20:00 - 20:10
85.33	20191201	07:00 - 07:10				83.615	20200704	21:00 - 21:10
87.935	20191201	08:00 - 08:10				88.685	20200704	22:00 - 22:10
86.69	20191201	09:00 - 09:10				90.085	20200704	23:00 - 23:10
90.19	20191201	10:00 - 10:10				83.01	20200705	00:00 - 00:10
84.31	20191201	11:00 - 11:10				87.625	20200705	01:00 - 01:10
85.405	20191201	12:00 - 12:10				82.645	20200705	02:00 - 02:10
85.26	20191201	13:00 - 13:10				81.43	20200705	03:00 - 03:10
88.925	20191201	14:00 - 14:10				82.905	20200705	04:00 - 04:10
89.07	20191201	15:00 - 15:10				85.41	20200705	05:00 - 05:10
87.93	20191201	16:00 - 16:10				82.35	20200705	06:00 - 06:10
90.055	20191201	17:00 - 17:10				83.8	20200705	07:00 - 07:10
88.33	20191201	18:00 - 18:10				83.965	20200705	08:00 - 08:10
89.22	20191201	19:00 - 19:10				82.525	20200705	09:00 - 09:10
85.865	20191201	20:00 - 20:10				82.005	20200705	10:00 - 10:10
84.93	20191201	21:00 - 21:10				86.465	20200705	11:00 - 11:10
91.2	20191201	22:00 - 22:10				82.175	20200705	12:00 - 12:10
95.14	20191201	23:00 - 23:10				82.38	20200705	13:00 - 13:10
89.39	20191202	00:00 - 00:10				85.65	20200705	14:00 - 14:10
96.125	20191202	01:00 - 01:10				82.405	20200705	15:00 - 15:10
88.55	20191202	02:00 - 02:10				83.045	20200705	16:00 - 16:10
90.455	20191202	03:00 - 03:10				85.22	20200705	17:00 - 17:10
94.495	20191202	04:00 - 04:10				86.585	20200705	18:00 - 18:10
89.365	20191202	05:00 - 05:10				84.515	20200705	19:00 - 19:10
89.82	20191202	06:00 - 06:10				83.745	20200705	20:00 - 20:10
89.58	20191202	07:00 - 07:10				88.65	20200705	21:00 - 21:10
91.505	20191202	08:00 - 08:10				85.235	20200705	22:00 - 22:10
87.52	20191202	09:00 - 09:10				82.665	20200705	23:00 - 23:10
89.195	20191202	10:00 - 10:10				81.37	20200706	00:00 - 00:10
86.295	20191202	11:00 - 11:10				87.445	20200706	01:00 - 01:10
90.755	20191202	12:00 - 12:10				83.055	20200706	02:00 - 02:10
84.68	20191202	13:00 - 13:10				81.785	20200706	03:00 - 03:10
86.595	20191202	14:00 - 14:10				80.765	20200706	04:00 - 04:10
85.885	20191202	15:00 - 15:10				80.86	20200706	05:00 - 05:10
86.17	20191202	16:00 - 16:10				82.86	20200706	06:00 - 06:10
86.04	20191202	17:00 - 17:10				81.06	20200706	07:00 - 07:10
87.55	20191202	18:00 - 18:10				85.52	20200706	08:00 - 08:10
89.115	20191202	19:00 - 19:10				86.125	20200706	09:00 - 09:10
86.36	20191202	20:00 - 20:10				83.86	20200706	10:00 - 10:10
85.61	20191202	21:00 - 21:10				90.26	20200706	11:00 - 11:10
90.64	20191202	22:00 - 22:10				83.615	20200706	12:00 - 12:10
93.71	20191202	23:00 - 23:10				84.56	20200706	13:00 - 13:10
88.06	20191203	00:00 - 00:10				84.625	20200706	14:00 - 14:10
88.41	20191203	01:00 - 01:10				83.145	20200706	15:00 - 15:10
89.8	20191203	02:00 - 02:10				82.76	20200706	16:00 - 16:10
88.555	20191203	03:00 - 03:10				82.605	20200706	17:00 - 17:10
85.695	20191203	04:00 - 04:10				84.055	20200706	18:00 - 18:10
85.295	20191203	05:00 - 05:10				85.2	20200706	19:00 - 19:10
86.985	20191203	06:00 - 06:10				84.255	20200706	20:00 - 20:10
90.465	20191203	07:00 - 07:10				88.35	20200706	21:00 - 21:10
84.82	20191203	08:00 - 08:10				86.465	20200706	22:00 - 22:10
87.575	20191203	09:00 - 09:10				84.25	20200706	23:00 - 23:10
84.305	20191203	10:00 - 10:10				86.465	20200707	00:00 - 00:10
86.73	20191203	11:00 - 11:10				81.775	20200707	01:00 - 01:10
83.375	20191203	12:00 - 12:10				84.475	20200707	02:00 - 02:10
88.08	20191203	13:00 - 13:10				84.445	20200707	03:00 - 03:10
85.37	20191203	14:00 - 14:10				82.1	20200707	04:00 - 04:10
84.775	20191203	15:00 - 15:10				83.15	20200707	05:00 - 05:10
90.495	20191203	16:00 - 16:10				83.27	20200707	06:00 - 06:10
85.99	20191203	17:00 - 17:10				83.51	20200707	07:00 - 07:10
89.015	20191203	18:00 - 18:10				82.235	20200707	08:00 - 08:10
85.62	20191203	19:00 - 19:10				84.775	20200707	09:00 - 09:10
86.045	20191203	20:00 - 20:10				86.92	20200707	10:00 - 10:10
92	20191203	21:00 - 21:10				84.19	20200707	11:00 - 11:10
91.31	20191203	22:00 - 22:10				84.295	20200707	12:00 - 12:10
86.39	20191203	23:00 - 23:10				84.21	20200707	13:00 - 13:10
92.1	20191204	00:00 - 00:10				84.765	20200707	14:00 - 14:10
83.68	20191204	01:00 - 01:10				83.91	20200707	15:00 - 15:10
83.385	20191204	02:00 - 02:10				84.335	20200707	16:00 - 16:10
86.2	20191204	03:00 - 03:10				86.045	20200707	17:00 - 17:10
89.69	20191204	04:00 - 04:10				84.05	20200707	18:00 - 18:10
86.52	20191204	05:00 - 05:10				86.21	20200707	19:00 - 19:10
88.63	20191204	06:00 - 06:10				83.81	20200707	20:00 - 20:10
88.595	20191204	07:00 - 07:10				95.34	20200707	21:00 - 21:10
87.965	20191204	08:00 - 08:10				90.19	20200707	22:00 - 22:10
86.69	20191204	09:00 - 09:10				84.75	20200707	23:00 - 23:10
88.73	20191204	10:00 - 10:10				88.875	20200708	00:00 - 00:10
84.1	20191204	11:00 - 11:10				84.025	20200708	01:00 - 01:10
86.255	20191204	12:00 - 12:10				83.29	20200708	02:00 - 02:10
88.79	20191204	13:00 - 13:10				83.01	20200708	03:00 - 03:10
86.53	20191204	14:00 - 14:10				84.035	20200708	04:00 - 04:10
86.325	20191204	15:00 - 15:10				82.815	20200708	05:00 - 05:10
86.965	20191204	16:00 - 16:10				85.11	20200708	06:00 - 06:10
86.85	20191204	17:00 - 17:10				83.75	20200708	07:00 - 07:10
89.34	20191204	18:00 - 18:10				85.16	20200708	08:00 - 08:10
88.58	20191204	19:00 - 19:10				83.595	20200708	09:00 - 09:10
89.215	20191204	20:00 - 20:10				84.855	20200708	10:00 - 10:10
88.925	20191204	21:00 - 21:10				83.49	20200708	11:00 - 11:10
86.5	20191204	22:00 - 22:10				87.615	20200708	12:00 - 12:10
83.41	20191204	23:00 - 23:10				85.28	20200708	13:00 - 13:10
84.035	20191205	00:00 - 00:10				86.235	20200708	14:00 - 14:10
86.455	20191205	01:00 - 01:10				95.67	20200708	15:00 - 15:10
86.77	20191205	02:00 - 02:10				85.06	20200708	16:00 - 16:10
83.955	20191205	03:00 - 03:10				82.48	20200708	17:00 - 17:10
83.04	20191205	04:00 - 04:10				83.335	20200708	18:00 - 18:10
86.085	20191205	05:00 - 05:10				86.28	20200708	19:00 - 19:10
86.96	20191205	06:00 - 06:10				86.045	20200708	20:00 - 20:10
90.155	20191205	07:00 - 07:10				87.715	20200708	21:00 - 21:10
90.985	20191205	08:00 - 08:10				85.83	20200708	22:00 - 22:10
89.96	20191205	09:00 - 09:10				82.3	20200708	23:00 - 23:10
84.52	20191205	10:00 - 10:10				81.355	20200709	00:00 - 00:10
87.38	20191205	11:00 - 11:10				84.29	20200709	01:00 - 01:10
86.655	20191205	12:00 - 12:10				81.75	20200709	02:00 - 02:10
87.72	20191205	13:00 - 13:10				84.485	20200709	03:00 - 03:10
94.125	20191205	14:00 - 14:10				81.97	20200709	04:00 - 04:10
89.19	20191205	15:00 - 15:10				82.025	20200709	05:00 - 05:10
94.89	20191205	16:00 - 16:10				87.945	20200709	06:00 - 06:10
85.925	20191205	17:00 - 17:10				83.645	20200709	07:00 - 07:10
88.15	20191205	18:00 - 18:10				86.245	20200709	08:00 - 08:10
86.86	20191205	19:00 - 19:10				93.015	20200709	09:00 - 09:10
90.745	20191205	20:00 - 20:10				88.43	20200709	10:00 - 10:10
90.725	20191205	21:00 - 21:10				89.57	20200709	11:00 - 11:10
86.09	20191205	22:00 - 22:10				86.09	20200709	12:00 - 12:10
87.69	20191205	23:00 - 23:10				84.445	20200709	13:00 - 13:10
85.74	20191206	00:00 - 00:10				86.785	20200709	14:00 - 14:10
84.24	20191206	01:00 - 01:10				85.12	20200709	15:00 - 15:10
82.745	20191206	02:00 - 02:10				86.2	20200709	16:00 - 16:10
82.97	20191206	03:00 - 03:10				84.3	20200709	17:00 - 17:10
86.275	20191206	04:00 - 04:10				84.575	20200709	18:00 - 18:10
87.305	20191206	05:00 - 05:10				84.98	20200709	19:00 - 19:10
90.19	20191206	06:00 - 06:10				83.495	20200709	20:00 - 20:10
87.575	20191206	07:00 - 07:10				86.94	20200709	21:00 - 21:10
90.915	20191206	08:00 - 08:10				86.07	20200709	22:00 - 22:10
87.7	20191206	09:00 - 09:10				83.04	20200709	23:00 - 23:10
85.885	20191206	10:00 - 10:10				84	20200710	00:00 - 00:10
82.685	20191206	11:00 - 11:10				85.53	20200710	01:00 - 01:10
87.515	20191206	12:00 - 12:10				84.085	20200710	02:00 - 02:10
84.115	20191206	13:00 - 13:10				85.915	20200710	03:00 - 03:10
87.055	20191206	14:00 - 14:10				85.65	20200710	04:00 - 04:10
86.71	20191206	15:00 - 15:10				85.84	20200710	05:00 - 05:10
87.15	20191206	16:00 - 16:10				87.26	20200710	06:00 - 06:10
87.16	20191206	17:00 - 17:10				88.315	20200710	07:00 - 07:10
94.835	20191206	18:00 - 18:10				93.83	20200710	08:00 - 08:10
90.355	20191206	19:00 - 19:10				86.665	20200710	09:00 - 09:10
86.195	20191206	20:00 - 20:10				85.755	20200710	10:00 - 10:10
86.455	20191206	21:00 - 21:10				85.64	20200710	11:00 - 11:10
84.23	20191206	22:00 - 22:10				87.88	20200710	12:00 - 12:10
81.98	20191206	23:00 - 23:10				86.495	20200710	13:00 - 13:10
85.295	20191207	00:00 - 00:10				85.865	20200710	14:00 - 14:10
86.88	20191207	01:00 - 01:10				86.66	20200710	15:00 - 15:10
89.33	20191207	02:00 - 02:10				85.105	20200710	16:00 - 16:10
90.435	20191207	03:00 - 03:10				84.795	20200710	17:00 - 17:10
86.08	20191207	04:00 - 04:10				84.26	20200710	18:00 - 18:10
86.05	20191207	05:00 - 05:10				84.985	20200710	19:00 - 19:10
86.36	20191207	06:00 - 06:10				87.305	20200710	20:00 - 20:10
84.96	20191207	07:00 - 07:10				87.05	20200710	21:00 - 21:10
91.59	20191207	08:00 - 08:10				88.925	20200710	22:00 - 22:10
84.12	20191207	09:00 - 09:10				85.415	20200710	23:00 - 23:10
91.9	20191207	10:00 - 10:10				84.805	20200711	00:00 - 00:10
90.76	20191207	11:00 - 11:10				84.92	20200711	01:00 - 01:10
87.59	20191207	12:00 - 12:10				85.065	20200711	02:00 - 02:10
87.96	20191207	13:00 - 13:10				86.685	20200711	03:00 - 03:10
88.66	20191207	14:00 - 14:10				90.555	20200711	04:00 - 04:10
88.94	20191207	15:00 - 15:10				85.96	20200711	05:00 - 05:10
87.995	20191207	16:00 - 16:10				85.73	20200711	06:00 - 06:10
88.395	20191207	17:00 - 17:10				86.635	20200711	07:00 - 07:10
88.255	20191207	18:00 - 18:10				83.175	20200711	08:00 - 08:10
90.715	20191207	19:00 - 19:10				90.665	20200711	09:00 - 09:10
85.68	20191207	20:00 - 20:10				85.51	20200711	10:00 - 10:10
84.95	20191207	21:00 - 21:10				90.14	20200711	11:00 - 11:10
85.475	20191207	22:00 - 22:10				85.655	20200711	12:00 - 12:10
85.85	20191207	23:00 - 23:10				87.645	20200711	13:00 - 13:10
88.11	20191208	00:00 - 00:10				87.55	20200711	14:00 - 14:10
90.325	20191208	01:00 - 01:10				85.35	20200711	15:00 - 15:10
88.22	20191208	02:00 - 02:10				85.31	20200711	16:00 - 16:10
89.74	20191208	03:00 - 03:10				84.735	20200711	17:00 - 17:10
88.095	20191208	04:00 - 04:10				84.08	20200711	18:00 - 18:10
93.845	20191208	05:00 - 05:10				87.43	20200711	19:00 - 19:10
88.78	20191208	06:00 - 06:10				87.59	20200711	20:00 - 20:10
93.25	20191208	07:00 - 07:10				88.645	20200711	21:00 - 21:10
84.925	20191208	08:00 - 08:10				86.785	20200711	22:00 - 22:10
84.7	20191208	09:00 - 09:10				85.95	20200711	23:00 - 23:10
88.945	20191208	10:00 - 10:10				86.59	20200712	00:00 - 00:10
86.26	20191208	11:00 - 11:10				86.725	20200712	01:00 - 01:10
84.205	20191208	12:00 - 12:10				91.23	20200712	02:00 - 02:10
84.945	20191208	13:00 - 13:10				87.65	20200712	03:00 - 03:10
92.525	20191208	14:00 - 14:10				91.36	20200712	04:00 - 04:10
87.755	20191208	15:00 - 15:10				82.93	20200712	05:00 - 05:10
86.72	20191208	16:00 - 16:10				84.45	20200712	06:00 - 06:10
88.43	20191208	17:00 - 17:10				84.905	20200712	07:00 - 07:10
88.835	20191208	18:00 - 18:10				83.005	20200712	08:00 - 08:10
90.7	20191208	19:00 - 19:10				83.615	20200712	09:00 - 09:10
88.32	20191208	20:00 - 20:10				82.46	20200712	10:00 - 10:10
85.905	20191208	21:00 - 21:10				83.73	20200712	11:00 - 11:10
84.825	20191208	22:00 - 22:10				84.515	20200712	12:00 - 12:10
88.38	20191208	23:00 - 23:10				82.51	20200712	13:00 - 13:10
91.625	20191209	00:00 - 00:10				81	20200712	14:00 - 14:10
91.545	20191209	01:00 - 01:10				82.71	20200712	15:00 - 15:10
91.185	20191209	02:00 - 02:10				82.005	20200712	16:00 - 16:10
88.34	20191209	03:00 - 03:10				81.335	20200712	17:00 - 17:10
92.895	20191209	04:00 - 04:10				81.635	20200712	18:00 - 18:10
85.725	20191209	05:00 - 05:10				83.2	20200712	19:00 - 19:10
89.04	20191209	06:00 - 06:10				81.455	20200712	20:00 - 20:10
88.155	20191209	07:00 - 07:10				87.5	20200712	21:00 - 21:10
84.855	20191209	08:00 - 08:10				87.19	20200712	22:00 - 22:10
88.415	20191209	09:00 - 09:10				84.18	20200712	23:00 - 23:10
85.82	20191209	10:00 - 10:10				86.24	20200713	00:00 - 00:10
86.475	20191209	11:00 - 11:10				83.565	20200713	01:00 - 01:10
87.59	20191209	12:00 - 12:10				82.75	20200713	02:00 - 02:10
85.82	20191209	13:00 - 13:10				83.845	20200713	03:00 - 03:10
89.815	20191209	14:00 - 14:10				85.625	20200713	04:00 - 04:10
89.04	20191209	15:00 - 15:10				82.205	20200713	05:00 - 05:10
89.17	20191209	16:00 - 16:10				82.765	20200713	06:00 - 06:10
87.545	20191209	17:00 - 17:10				81.99	20200713	07:00 - 07:10
91.15	20191209	18:00 - 18:10				80.695	20200713	08:00 - 08:10
88.795	20191209	19:00 - 19:10				80.76	20200713	09:00 - 09:10
93.385	20191209	20:00 - 20:10				86.85	20200713	10:00 - 10:10
90.94	20191209	21:00 - 21:10				81.975	20200713	11:00 - 11:10
94.855	20191209	22:00 - 22:10				85.64	20200713	12:00 - 12:10
95.48	20191209	23:00 - 23:10				82.82	20200713	13:00 - 13:10
88.555	20191210	00:00 - 00:10				81.38	20200713	14:00 - 14:10
87.455	20191210	01:00 - 01:10				80.24	20200713	15:00 - 15:10
86.29	20191210	02:00 - 02:10				80.67	20200713	16:00 - 16:10
88.655	20191210	03:00 - 03:10				81.275	20200713	17:00 - 17:10
87.21	20191210	04:00 - 04:10				82.49	20200713	18:00 - 18:10
87.78	20191210	05:00 - 05:10				84.28	20200713	19:00 - 19:10
88.175	20191210	06:00 - 06:10				84.33	20200713	20:00 - 20:10
89.175	20191210	07:00 - 07:10				85.675	20200713	21:00 - 21:10
88.2	20191210	08:00 - 08:10				83.42	20200713	22:00 - 22:10
91.165	20191210	09:00 - 09:10				83.815	20200713	23:00 - 23:10
89.4	20191210	10:00 - 10:10				80.545	20200714	00:00 - 00:10
90.69	20191210	11:00 - 11:10				84.59	20200714	01:00 - 01:10
90.07	20191210	12:00 - 12:10				86.43	20200714	02:00 - 02:10
91.395	20191210	13:00 - 13:10				89.235	20200714	03:00 - 03:10
88.46	20191210	14:00 - 14:10				85.19	20200714	04:00 - 04:10
88.195	20191210	15:00 - 15:10				85.005	20200714	05:00 - 05:10
89.83	20191210	16:00 - 16:10				89.785	20200714	06:00 - 06:10
90.255	20191210	17:00 - 17:10				83.005	20200714	07:00 - 07:10
92.865	20191210	18:00 - 18:10				81.275	20200714	08:00 - 08:10
89.66	20191210	19:00 - 19:10				82.57	20200714	09:00 - 09:10
92.175	20191210	20:00 - 20:10				81.975	20200714	10:00 - 10:10
89.95	20191210	21:00 - 21:10				82.135	20200714	11:00 - 11:10
91.09	20191210	22:00 - 22:10				82.03	20200714	12:00 - 12:10
89.065	20191210	23:00 - 23:10				81.25	20200714	13:00 - 13:10
87.91	20191211	00:00 - 00:10				82.44	20200714	14:00 - 14:10
88.86	20191211	01:00 - 01:10				84.395	20200714	15:00 - 15:10
89.98	20191211	02:00 - 02:10				84.465	20200714	16:00 - 16:10
86.515	20191211	03:00 - 03:10				83.695	20200714	17:00 - 17:10
84.605	20191211	04:00 - 04:10				83.565	20200714	18:00 - 18:10
89.9	20191211	05:00 - 05:10				86.84	20200714	19:00 - 19:10
86.14	20191211	06:00 - 06:10				84.235	20200714	20:00 - 20:10
85.095	20191211	07:00 - 07:10				91.695	20200714	21:00 - 21:10
89.545	20191211	08:00 - 08:10				83.115	20200714	22:00 - 22:10
86.495	20191211	09:00 - 09:10				82.575	20200714	23:00 - 23:10
87.535	20191211	10:00 - 10:10				81.41	20200715	00:00 - 00:10
90.365	20191211	11:00 - 11:10				82.82	20200715	01:00 - 01:10
86.765	20191211	12:00 - 12:10				82.715	20200715	02:00 - 02:10
87.645	20191211	13:00 - 13:10				84.27	20200715	03:00 - 03:10
86.58	20191211	14:00 - 14:10				82.94	20200715	04:00 - 04:10
89.25	20191211	15:00 - 15:10				84.065	20200715	05:00 - 05:10
89.05	20191211	16:00 - 16:10				83.135	20200715	06:00 - 06:10
90.215	20191211	17:00 - 17:10				82.095	20200715	07:00 - 07:10
90.44	20191211	18:00 - 18:10				82.69	20200715	08:00 - 08:10
94.245	20191211	19:00 - 19:10				81.885	20200715	09:00 - 09:10
87.905	20191211	20:00 - 20:10				83.65	20200715	10:00 - 10:10
87.95	20191211	21:00 - 21:10				83.58	20200715	11:00 - 11:10
85.08	20191211	22:00 - 22:10				88.225	20200715	12:00 - 12:10
84.96	20191211	23:00 - 23:10				83.935	20200715	13:00 - 13:10
87.175	20191212	00:00 - 00:10				82.655	20200715	14:00 - 14:10
90.075	20191212	01:00 - 01:10				85.42	20200715	15:00 - 15:10
87.12	20191212	02:00 - 02:10				82.735	20200715	16:00 - 16:10
84.81	20191212	03:00 - 03:10				84.365	20200715	17:00 - 17:10
85.375	20191212	04:00 - 04:10				84.71	20200715	18:00 - 18:10
86.895	20191212	05:00 - 05:10				84.145	20200715	19:00 - 19:10
88.255	20191212	06:00 - 06:10				83.455	20200715	20:00 - 20:10
90.61	20191212	07:00 - 07:10				89.39	20200715	21:00 - 21:10
90.31	20191212	08:00 - 08:10				84.165	20200715	22:00 - 22:10
86.61	20191212	09:00 - 09:10				83.97	20200715	23:00 - 23:10
87.365	20191212	10:00 - 10:10				83.15	20200716	00:00 - 00:10
89.705	20191212	11:00 - 11:10				83.935	20200716	01:00 - 01:10
87.865	20191212	12:00 - 12:10				83.57	20200716	02:00 - 02:10
88.71	20191212	13:00 - 13:10				80.155	20200716	03:00 - 03:10
94.65	20191212	14:00 - 14:10				80.38	20200716	04:00 - 04:10
90.095	20191212	15:00 - 15:10				81.585	20200716	05:00 - 05:10
90.29	20191212	16:00 - 16:10				87.22	20200716	06:00 - 06:10
91.87	20191212	17:00 - 17:10				85.185	20200716	07:00 - 07:10
89.3	20191212	18:00 - 18:10				81.465	20200716	08:00 - 08:10
91.79	20191212	19:00 - 19:10				81.83	20200716	09:00 - 09:10
88.04	20191212	20:00 - 20:10				82.055	20200716	10:00 - 10:10
90.635	20191212	21:00 - 21:10				93.15	20200716	11:00 - 11:10
91.885	20191212	22:00 - 22:10				87.65	20200716	12:00 - 12:10
89.565	20191212	23:00 - 23:10				84.965	20200716	13:00 - 13:10
88.94	20191213	00:00 - 00:10				84.36	20200716	14:00 - 14:10
90.05	20191213	01:00 - 01:10				84.26	20200716	15:00 - 15:10
93.42	20191213	02:00 - 02:10				85.165	20200716	16:00 - 16:10
92.67	20191213	03:00 - 03:10				89.305	20200716	17:00 - 17:10
92.86	20191213	04:00 - 04:10				90.77	20200716	18:00 - 18:10
94.14	20191213	05:00 - 05:10				85.365	20200716	19:00 - 19:10
94.07	20191213	06:00 - 06:10				82.77	20200716	20:00 - 20:10
96.225	20191213	07:00 - 07:10				89.09	20200716	21:00 - 21:10
94.98	20191213	08:00 - 08:10				81.915	20200716	22:00 - 22:10
96.61	20191213	09:00 - 09:10				80.97	20200716	23:00 - 23:10
96	20191213	10:00 - 10:10				82.85	20200717	00:00 - 00:10
95.69	20191213	11:00 - 11:10				81.725	20200717	01:00 - 01:10
95.05	20191213	12:00 - 12:10				81.775	20200717	02:00 - 02:10
95.825	20191213	13:00 - 13:10				84.765	20200717	03:00 - 03:10
93.62	20191213	14:00 - 14:10				86.59	20200717	04:00 - 04:10
93.395	20191213	15:00 - 15:10				85.455	20200717	05:00 - 05:10
94.805	20191213	16:00 - 16:10				82.7	20200717	06:00 - 06:10
94.985	20191213	17:00 - 17:10				83.085	20200717	07:00 - 07:10
95.405	20191213	18:00 - 18:10				83.415	20200717	08:00 - 08:10
96.055	20191213	19:00 - 19:10				82.645	20200717	09:00 - 09:10
92.555	20191213	20:00 - 20:10				84.3	20200717	10:00 - 10:10
92.105	20191213	21:00 - 21:10				83.005	20200717	11:00 - 11:10
93.56	20191213	22:00 - 22:10				82.64	20200717	12:00 - 12:10
92.975	20191213	23:00 - 23:10				81.075	20200717	13:00 - 13:10
90.015	20191214	00:00 - 00:10				82.785	20200717	14:00 - 14:10
93.875	20191214	01:00 - 01:10				82.33	20200717	15:00 - 15:10
93.39	20191214	02:00 - 02:10				87.28	20200717	16:00 - 16:10
94.21	20191214	03:00 - 03:10				82.905	20200717	17:00 - 17:10
91.14	20191214	04:00 - 04:10				83.67	20200717	18:00 - 18:10
88.98	20191214	05:00 - 05:10				86.08	20200717	19:00 - 19:10
91.62	20191214	06:00 - 06:10				84.01	20200717	20:00 - 20:10
92.285	20191214	07:00 - 07:10				86.865	20200717	21:00 - 21:10
88.885	20191214	08:00 - 08:10				85.68	20200717	22:00 - 22:10
92.235	20191214	09:00 - 09:10				83.74	20200717	23:00 - 23:10
90.57	20191214	10:00 - 10:10				83.005	20200718	00:00 - 00:10
88.64	20191214	11:00 - 11:10				82.175	20200718	01:00 - 01:10
87.75	20191214	12:00 - 12:10				82.45	20200718	02:00 - 02:10
90.72	20191214	13:00 - 13:10				81.76	20200718	03:00 - 03:10
88.18	20191214	14:00 - 14:10				85.255	20200718	04:00 - 04:10
87.74	20191214	15:00 - 15:10				86.6	20200718	05:00 - 05:10
90.65	20191214	16:00 - 16:10				84.535	20200718	06:00 - 06:10
88.44	20191214	17:00 - 17:10				84.91	20200718	07:00 - 07:10
95.125	20191214	18:00 - 18:10				83.9	20200718	08:00 - 08:10
89.345	20191214	19:00 - 19:10				83.98	20200718	09:00 - 09:10
89.69	20191214	20:00 - 20:10				84.51	20200718	10:00 - 10:10
87.38	20191214	21:00 - 21:10				82.87	20200718	11:00 - 11:10
85.575	20191214	22:00 - 22:10				82.74	20200718	12:00 - 12:10
90.07	20191214	23:00 - 23:10				90.535	20200718	13:00 - 13:10
87.235	20191215	00:00 - 00:10				84.78	20200718	14:00 - 14:10
90.99	20191215	01:00 - 01:10				83.945	20200718	15:00 - 15:10
89.47	20191215	02:00 - 02:10				82.775	20200718	16:00 - 16:10
90.47	20191215	03:00 - 03:10				84.045	20200718	17:00 - 17:10
88.265	20191215	04:00 - 04:10				85.06	20200718	18:00 - 18:10
87.15	20191215	05:00 - 05:10				86.49	20200718	19:00 - 19:10
85.45	20191215	06:00 - 06:10				91.56	20200718	20:00 - 20:10
86.09	20191215	07:00 - 07:10				86.35	20200718	21:00 - 21:10
88.37	20191215	08:00 - 08:10				83.03	20200718	22:00 - 22:10
84.655	20191215	09:00 - 09:10				82.075	20200718	23:00 - 23:10
87.52	20191215	10:00 - 10:10				81.5	20200719	00:00 - 00:10
88.59	20191215	11:00 - 11:10				80.985	20200719	01:00 - 01:10
89.33	20191215	12:00 - 12:10				81.99	20200719	02:00 - 02:10
89.21	20191215	13:00 - 13:10				80.455	20200719	03:00 - 03:10
92.45	20191215	14:00 - 14:10				81.335	20200719	04:00 - 04:10
89.595	20191215	15:00 - 15:10				80.2	20200719	05:00 - 05:10
89.66	20191215	16:00 - 16:10				80.835	20200719	06:00 - 06:10
92.475	20191215	17:00 - 17:10				80.895	20200719	07:00 - 07:10
96.255	20191215	18:00 - 18:10				81.625	20200719	08:00 - 08:10
94.38	20191215	19:00 - 19:10				81.115	20200719	09:00 - 09:10
90.735	20191215	20:00 - 20:10				80.305	20200719	10:00 - 10:10
99.23	20191215	21:00 - 21:10				80.64	20200719	11:00 - 11:10
89.225	20191215	22:00 - 22:10				81.1	20200719	12:00 - 12:10
87.67	20191215	23:00 - 23:10				81.595	20200719	13:00 - 13:10
88.68	20191216	00:00 - 00:10				82.175	20200719	14:00 - 14:10
91.15	20191216	01:00 - 01:10				84.26	20200719	15:00 - 15:10
95.505	20191216	02:00 - 02:10				85.895	20200719	16:00 - 16:10
93.015	20191216	03:00 - 03:10				87.3	20200719	17:00 - 17:10
96.07	20191216	04:00 - 04:10				83.575	20200719	18:00 - 18:10
89.935	20191216	05:00 - 05:10				82.475	20200719	19:00 - 19:10
92.16	20191216	06:00 - 06:10				84.08	20200719	20:00 - 20:10
88.66	20191216	07:00 - 07:10				84.76	20200719	21:00 - 21:10
88.62	20191216	08:00 - 08:10				84.865	20200719	22:00 - 22:10
89.765	20191216	09:00 - 09:10				87.51	20200719	23:00 - 23:10
90.86	20191216	10:00 - 10:10				85.855	20200720	00:00 - 00:10
87.065	20191216	11:00 - 11:10				87.98	20200720	01:00 - 01:10
88.2	20191216	12:00 - 12:10				89.165	20200720	02:00 - 02:10
90.605	20191216	13:00 - 13:10				87.905	20200720	03:00 - 03:10
88.87	20191216	14:00 - 14:10				86.6	20200720	04:00 - 04:10
91.13	20191216	15:00 - 15:10				84.4	20200720	05:00 - 05:10
93.14	20191216	16:00 - 16:10				86.75	20200720	06:00 - 06:10
91.635	20191216	17:00 - 17:10				83.77	20200720	07:00 - 07:10
92.925	20191216	18:00 - 18:10				86.14	20200720	08:00 - 08:10
89.285	20191216	19:00 - 19:10				83.095	20200720	09:00 - 09:10
88.73	20191216	20:00 - 20:10				81.415	20200720	10:00 - 10:10
88.66	20191216	21:00 - 21:10				82.685	20200720	11:00 - 11:10
90.175	20191216	22:00 - 22:10				81.05	20200720	12:00 - 12:10
90.46	20191216	23:00 - 23:10				83.07	20200720	13:00 - 13:10
90.9	20191217	00:00 - 00:10				83.815	20200720	14:00 - 14:10
92.585	20191217	01:00 - 01:10				82.325	20200720	15:00 - 15:10
94.08	20191217	02:00 - 02:10				85.255	20200720	16:00 - 16:10
88.085	20191217	03:00 - 03:10				82.18	20200720	17:00 - 17:10
94.81	20191217	04:00 - 04:10				82.725	20200720	18:00 - 18:10
88.015	20191217	05:00 - 05:10				85.445	20200720	19:00 - 19:10
94.31	20191217	06:00 - 06:10				82.16	20200720	20:00 - 20:10
89.52	20191217	07:00 - 07:10				84.2	20200720	21:00 - 21:10
87.355	20191217	08:00 - 08:10				82	20200720	22:00 - 22:10
86.635	20191217	09:00 - 09:10				84.795	20200720	23:00 - 23:10
88.335	20191217	10:00 - 10:10				85.955	20200721	00:00 - 00:10
89.025	20191217	11:00 - 11:10				83.935	20200721	01:00 - 01:10
87.285	20191217	12:00 - 12:10				83.265	20200721	02:00 - 02:10
87.09	20191217	13:00 - 13:10				86.56	20200721	03:00 - 03:10
90.905	20191217	14:00 - 14:10				82.865	20200721	04:00 - 04:10
89.995	20191217	15:00 - 15:10				84.065	20200721	05:00 - 05:10
93	20191217	16:00 - 16:10				84.235	20200721	06:00 - 06:10
92.425	20191217	17:00 - 17:10				82.315	20200721	07:00 - 07:10
88.69	20191217	18:00 - 18:10				81.395	20200721	08:00 - 08:10
89.9	20191217	19:00 - 19:10				81.495	20200721	09:00 - 09:10
87.48	20191217	20:00 - 20:10				82.16	20200721	10:00 - 10:10
86.765	20191217	21:00 - 21:10				87.155	20200721	11:00 - 11:10
94.585	20191217	22:00 - 22:10				87.28	20200721	12:00 - 12:10
88.855	20191217	23:00 - 23:10				83.34	20200721	13:00 - 13:10
91.985	20191218	00:00 - 00:10				81.575	20200721	14:00 - 14:10
88.175	20191218	01:00 - 01:10				81.875	20200721	15:00 - 15:10
89.135	20191218	02:00 - 02:10				84	20200721	16:00 - 16:10
87.63	20191218	03:00 - 03:10				87.31	20200721	17:00 - 17:10
94.37	20191218	04:00 - 04:10				83.29	20200721	18:00 - 18:10
92.445	20191218	05:00 - 05:10				87.035	20200721	19:00 - 19:10
90.77	20191218	06:00 - 06:10				83.815	20200721	20:00 - 20:10
86.895	20191218	07:00 - 07:10				85.76	20200721	21:00 - 21:10
90.335	20191218	08:00 - 08:10				83.82	20200721	22:00 - 22:10
88.08	20191218	09:00 - 09:10				86.905	20200721	23:00 - 23:10
86.63	20191218	10:00 - 10:10				85.605	20200722	00:00 - 00:10
86.41	20191218	11:00 - 11:10				84.635	20200722	01:00 - 01:10
92	20191218	12:00 - 12:10				83.245	20200722	02:00 - 02:10
90.605	20191218	13:00 - 13:10				85.645	20200722	03:00 - 03:10
87.11	20191218	14:00 - 14:10				84.795	20200722	04:00 - 04:10
88.13	20191218	15:00 - 15:10				84.55	20200722	05:00 - 05:10
92.61	20191218	16:00 - 16:10				82.915	20200722	06:00 - 06:10
90.205	20191218	17:00 - 17:10				82.13	20200722	07:00 - 07:10
90.28	20191218	18:00 - 18:10				84	20200722	08:00 - 08:10
86.97	20191218	19:00 - 19:10				80.87	20200722	09:00 - 09:10
87.365	20191218	20:00 - 20:10				82.87	20200722	10:00 - 10:10
85.175	20191218	21:00 - 21:10				86.62	20200722	11:00 - 11:10
87.69	20191218	22:00 - 22:10				85.305	20200722	12:00 - 12:10
83.965	20191218	23:00 - 23:10				84.06	20200722	13:00 - 13:10
83.79	20191219	00:00 - 00:10				82.105	20200722	14:00 - 14:10
90.185	20191219	01:00 - 01:10				84.24	20200722	15:00 - 15:10
92.425	20191219	02:00 - 02:10				80.185	20200722	16:00 - 16:10
92.09	20191219	03:00 - 03:10				81.765	20200722	17:00 - 17:10
89.195	20191219	04:00 - 04:10				82.19	20200722	18:00 - 18:10
96.57	20191219	05:00 - 05:10				87.125	20200722	19:00 - 19:10
91.165	20191219	06:00 - 06:10				82.69	20200722	20:00 - 20:10
92.82	20191219	07:00 - 07:10				86.685	20200722	21:00 - 21:10
92.29	20191219	08:00 - 08:10				86.35	20200722	22:00 - 22:10
92.4	20191219	09:00 - 09:10				85.84	20200722	23:00 - 23:10
90.72	20191219	10:00 - 10:10				88.025	20200723	00:00 - 00:10
91.865	20191219	11:00 - 11:10				88.765	20200723	01:00 - 01:10
90.92	20191219	12:00 - 12:10				83.77	20200723	02:00 - 02:10
90.97	20191219	13:00 - 13:10				82.525	20200723	03:00 - 03:10
90.915	20191219	14:00 - 14:10				82.515	20200723	04:00 - 04:10
93.545	20191219	15:00 - 15:10				84	20200723	05:00 - 05:10
94.67	20191219	16:00 - 16:10				82.19	20200723	06:00 - 06:10
92.645	20191219	17:00 - 17:10				83.995	20200723	07:00 - 07:10
91.405	20191219	18:00 - 18:10				83.925	20200723	08:00 - 08:10
93.105	20191219	19:00 - 19:10				83.655	20200723	09:00 - 09:10
92.305	20191219	20:00 - 20:10				83.625	20200723	10:00 - 10:10
92.165	20191219	21:00 - 21:10				84.275	20200723	11:00 - 11:10
91.645	20191219	22:00 - 22:10				87.71	20200723	12:00 - 12:10
92.165	20191219	23:00 - 23:10				84.635	20200723	13:00 - 13:10
90.77	20191220	00:00 - 00:10				86.595	20200723	14:00 - 14:10
98.285	20191220	01:00 - 01:10				84.32	20200723	15:00 - 15:10
89.51	20191220	02:00 - 02:10				83.15	20200723	16:00 - 16:10
88.38	20191220	03:00 - 03:10				85.805	20200723	17:00 - 17:10
90.165	20191220	04:00 - 04:10				84.685	20200723	18:00 - 18:10
91.245	20191220	05:00 - 05:10				86.025	20200723	19:00 - 19:10
91.335	20191220	06:00 - 06:10				82.57	20200723	20:00 - 20:10
90.94	20191220	07:00 - 07:10				83.845	20200723	21:00 - 21:10
91.92	20191220	08:00 - 08:10				81.75	20200723	22:00 - 22:10
90.63	20191220	09:00 - 09:10				82.845	20200723	23:00 - 23:10
91.615	20191220	10:00 - 10:10				83.745	20200724	00:00 - 00:10
90.43	20191220	11:00 - 11:10				81.915	20200724	01:00 - 01:10
90.2	20191220	12:00 - 12:10				81.96	20200724	02:00 - 02:10
90.365	20191220	13:00 - 13:10				82.525	20200724	03:00 - 03:10
92.4	20191220	14:00 - 14:10				86.065	20200724	04:00 - 04:10
93.54	20191220	15:00 - 15:10				84.5	20200724	05:00 - 05:10
94.685	20191220	16:00 - 16:10				81.8	20200724	06:00 - 06:10
93.97	20191220	17:00 - 17:10				81.69	20200724	07:00 - 07:10
92.1	20191220	18:00 - 18:10				84.385	20200724	08:00 - 08:10
91.935	20191220	19:00 - 19:10				83.995	20200724	09:00 - 09:10
89.2	20191220	20:00 - 20:10				83.43	20200724	10:00 - 10:10
88.835	20191220	21:00 - 21:10				83.62	20200724	11:00 - 11:10
88.465	20191220	22:00 - 22:10				83.365	20200724	12:00 - 12:10
94.355	20191220	23:00 - 23:10				84.115	20200724	13:00 - 13:10
89.415	20191221	00:00 - 00:10				86.6	20200724	14:00 - 14:10
92.195	20191221	01:00 - 01:10				85.065	20200724	15:00 - 15:10
91.615	20191221	02:00 - 02:10				87.465	20200724	16:00 - 16:10
89.65	20191221	03:00 - 03:10				88.67	20200724	17:00 - 17:10
92.395	20191221	04:00 - 04:10				84.065	20200724	18:00 - 18:10
91.22	20191221	05:00 - 05:10				84.595	20200724	19:00 - 19:10
92.01	20191221	06:00 - 06:10				83.33	20200724	20:00 - 20:10
91.79	20191221	07:00 - 07:10				84.315	20200724	21:00 - 21:10
91.245	20191221	08:00 - 08:10				81.655	20200724	22:00 - 22:10
90.2	20191221	09:00 - 09:10				81.79	20200724	23:00 - 23:10
91.48	20191221	10:00 - 10:10				84.81	20200725	00:00 - 00:10
91.95	20191221	11:00 - 11:10				84.305	20200725	01:00 - 01:10
91.51	20191221	12:00 - 12:10				81.21	20200725	02:00 - 02:10
91.845	20191221	13:00 - 13:10				80.32	20200725	03:00 - 03:10
93.01	20191221	14:00 - 14:10				81.13	20200725	04:00 - 04:10
94.46	20191221	15:00 - 15:10				83.6	20200725	05:00 - 05:10
94.635	20191221	16:00 - 16:10				83.805	20200725	06:00 - 06:10
94.335	20191221	17:00 - 17:10				85.375	20200725	07:00 - 07:10
92.65	20191221	18:00 - 18:10				82.115	20200725	08:00 - 08:10
89.055	20191221	19:00 - 19:10				80.84	20200725	09:00 - 09:10
88.295	20191221	20:00 - 20:10				80.535	20200725	10:00 - 10:10
86.56	20191221	21:00 - 21:10				84.36	20200725	11:00 - 11:10
85.795	20191221	22:00 - 22:10				83.745	20200725	12:00 - 12:10
87.525	20191221	23:00 - 23:10				83.13	20200725	13:00 - 13:10
87.71	20191222	00:00 - 00:10				82.79	20200725	14:00 - 14:10
90.005	20191222	01:00 - 01:10				82.62	20200725	15:00 - 15:10
88.745	20191222	02:00 - 02:10				83	20200725	16:00 - 16:10
89.29	20191222	03:00 - 03:10				85.885	20200725	17:00 - 17:10
96.44	20191222	04:00 - 04:10				82.715	20200725	18:00 - 18:10
93.75	20191222	05:00 - 05:10				81.59	20200725	19:00 - 19:10
93.315	20191222	06:00 - 06:10				84.71	20200725	20:00 - 20:10
89.905	20191222	07:00 - 07:10				83.88	20200725	21:00 - 21:10
88.97	20191222	08:00 - 08:10				81.06	20200725	22:00 - 22:10
88.71	20191222	09:00 - 09:10				82.26	20200725	23:00 - 23:10
88.85	20191222	10:00 - 10:10				83.775	20200726	00:00 - 00:10
94.8	20191222	11:00 - 11:10				83.09	20200726	01:00 - 01:10
89.49	20191222	12:00 - 12:10				81.325	20200726	02:00 - 02:10
90.545	20191222	13:00 - 13:10				85.755	20200726	03:00 - 03:10
92.02	20191222	14:00 - 14:10				81.79	20200726	04:00 - 04:10
95.39	20191222	15:00 - 15:10				85.58	20200726	05:00 - 05:10
95.135	20191222	16:00 - 16:10				85.155	20200726	06:00 - 06:10
94.98	20191222	17:00 - 17:10				83.41	20200726	07:00 - 07:10
95.64	20191222	18:00 - 18:10				78.595	20200726	08:00 - 08:10
92.53	20191222	19:00 - 19:10				81.385	20200726	09:00 - 09:10
96.435	20191222	20:00 - 20:10				79.725	20200726	10:00 - 10:10
93.41	20191222	21:00 - 21:10				81.015	20200726	11:00 - 11:10
93.735	20191222	22:00 - 22:10				80.145	20200726	12:00 - 12:10
90.63	20191222	23:00 - 23:10				80.745	20200726	13:00 - 13:10
92.105	20191223	00:00 - 00:10				83.955	20200726	14:00 - 14:10
93.23	20191223	01:00 - 01:10				83.575	20200726	15:00 - 15:10
97.285	20191223	02:00 - 02:10				85.155	20200726	16:00 - 16:10
93.825	20191223	03:00 - 03:10				81.525	20200726	17:00 - 17:10
94.35	20191223	04:00 - 04:10				80.435	20200726	18:00 - 18:10
94.31	20191223	05:00 - 05:10				81.745	20200726	19:00 - 19:10
94.9	20191223	06:00 - 06:10				80.865	20200726	20:00 - 20:10
95.915	20191223	07:00 - 07:10				83.69	20200726	21:00 - 21:10
95.74	20191223	08:00 - 08:10				81.895	20200726	22:00 - 22:10
95.14	20191223	09:00 - 09:10				81.8	20200726	23:00 - 23:10
93.335	20191223	10:00 - 10:10				84.24	20200727	00:00 - 00:10
94.815	20191223	11:00 - 11:10				81.15	20200727	01:00 - 01:10
95.595	20191223	12:00 - 12:10				80.65	20200727	02:00 - 02:10
97.365	20191223	13:00 - 13:10				81.62	20200727	03:00 - 03:10
96.19	20191223	14:00 - 14:10				80.09	20200727	04:00 - 04:10
97.49	20191223	15:00 - 15:10				86.22	20200727	05:00 - 05:10
96.84	20191223	16:00 - 16:10				87.995	20200727	06:00 - 06:10
95.33	20191223	17:00 - 17:10				85.17	20200727	07:00 - 07:10
93.335	20191223	18:00 - 18:10				88.79	20200727	08:00 - 08:10
91.03	20191223	19:00 - 19:10				87.315	20200727	09:00 - 09:10
91.295	20191223	20:00 - 20:10				82.035	20200727	10:00 - 10:10
91.075	20191223	21:00 - 21:10				80.665	20200727	11:00 - 11:10
88.52	20191223	22:00 - 22:10				79.99	20200727	12:00 - 12:10
93.305	20191223	23:00 - 23:10				81.885	20200727	13:00 - 13:10
92.045	20191224	00:00 - 00:10				85.855	20200727	14:00 - 14:10
88.545	20191224	01:00 - 01:10				83.15	20200727	15:00 - 15:10
89.38	20191224	02:00 - 02:10				82.325	20200727	16:00 - 16:10
86.27	20191224	03:00 - 03:10				87.125	20200727	17:00 - 17:10
88.54	20191224	04:00 - 04:10				87.73	20200727	18:00 - 18:10
86.88	20191224	05:00 - 05:10				81.36	20200727	19:00 - 19:10
91.79	20191224	06:00 - 06:10				85.235	20200727	20:00 - 20:10
89.065	20191224	07:00 - 07:10				81.955	20200727	21:00 - 21:10
92.22	20191224	08:00 - 08:10				81.61	20200727	22:00 - 22:10
90.08	20191224	09:00 - 09:10				80.475	20200727	23:00 - 23:10
89.08	20191224	10:00 - 10:10				81.355	20200728	00:00 - 00:10
91.405	20191224	11:00 - 11:10				83.59	20200728	01:00 - 01:10
91.005	20191224	12:00 - 12:10				82.615	20200728	02:00 - 02:10
90.885	20191224	13:00 - 13:10				80.095	20200728	03:00 - 03:10
92.5	20191224	14:00 - 14:10				86.495	20200728	04:00 - 04:10
95.94	20191224	15:00 - 15:10				81.935	20200728	05:00 - 05:10
94.69	20191224	16:00 - 16:10				82.15	20200728	06:00 - 06:10
89.95	20191224	17:00 - 17:10				79.415	20200728	07:00 - 07:10
89.32	20191224	18:00 - 18:10				79.59	20200728	08:00 - 08:10
86.445	20191224	19:00 - 19:10				82.315	20200728	09:00 - 09:10
96.92	20191224	20:00 - 20:10				85.71	20200728	10:00 - 10:10
88.705	20191224	21:00 - 21:10				83.42	20200728	11:00 - 11:10
85.925	20191224	22:00 - 22:10				80.72	20200728	12:00 - 12:10
87.34	20191224	23:00 - 23:10				82.95	20200728	13:00 - 13:10
89.48	20191225	00:00 - 00:10				81.225	20200728	14:00 - 14:10
86.56	20191225	01:00 - 01:10				80.67	20200728	15:00 - 15:10
86.295	20191225	02:00 - 02:10				80.65	20200728	16:00 - 16:10
87.9	20191225	03:00 - 03:10				81.565	20200728	17:00 - 17:10
87.48	20191225	04:00 - 04:10				82.095	20200728	18:00 - 18:10
92.18	20191225	05:00 - 05:10				83.33	20200728	19:00 - 19:10
88.435	20191225	06:00 - 06:10				83.42	20200728	20:00 - 20:10
86.365	20191225	07:00 - 07:10				84.46	20200728	21:00 - 21:10
83.52	20191225	08:00 - 08:10				80.66	20200728	22:00 - 22:10
83.215	20191225	09:00 - 09:10				80.07	20200728	23:00 - 23:10
84.835	20191225	10:00 - 10:10				79.65	20200729	00:00 - 00:10
86.425	20191225	11:00 - 11:10				83.23	20200729	01:00 - 01:10
86.82	20191225	12:00 - 12:10				82.44	20200729	02:00 - 02:10
89.76	20191225	13:00 - 13:10				80.405	20200729	03:00 - 03:10
94.57	20191225	14:00 - 14:10				84.72	20200729	04:00 - 04:10
95.475	20191225	15:00 - 15:10				85.735	20200729	05:00 - 05:10
94.88	20191225	16:00 - 16:10				84.345	20200729	06:00 - 06:10
92.555	20191225	17:00 - 17:10				85.15	20200729	07:00 - 07:10
93.585	20191225	18:00 - 18:10				82.36	20200729	08:00 - 08:10
98.33	20191225	19:00 - 19:10				82.18	20200729	09:00 - 09:10
91.475	20191225	20:00 - 20:10				81.805	20200729	10:00 - 10:10
90.43	20191225	21:00 - 21:10				80.745	20200729	11:00 - 11:10
88.12	20191225	22:00 - 22:10				80.085	20200729	12:00 - 12:10
86.545	20191225	23:00 - 23:10				81.25	20200729	13:00 - 13:10
85.895	20191226	00:00 - 00:10				80.935	20200729	14:00 - 14:10
85.175	20191226	01:00 - 01:10				80.53	20200729	15:00 - 15:10
86.69	20191226	02:00 - 02:10				81.4	20200729	16:00 - 16:10
90.7	20191226	03:00 - 03:10				83.23	20200729	17:00 - 17:10
88.71	20191226	04:00 - 04:10				84.13	20200729	18:00 - 18:10
88.995	20191226	05:00 - 05:10				84.58	20200729	19:00 - 19:10
86.94	20191226	06:00 - 06:10				83.845	20200729	20:00 - 20:10
87.65	20191226	07:00 - 07:10				81.86	20200729	21:00 - 21:10
85.885	20191226	08:00 - 08:10				85.41	20200729	22:00 - 22:10
86.63	20191226	09:00 - 09:10				82.54	20200729	23:00 - 23:10
88.765	20191226	10:00 - 10:10				80.29	20200730	00:00 - 00:10
89.98	20191226	11:00 - 11:10				83.52	20200730	01:00 - 01:10
90.16	20191226	12:00 - 12:10				84.655	20200730	02:00 - 02:10
89.19	20191226	13:00 - 13:10				81.89	20200730	03:00 - 03:10
92.01	20191226	14:00 - 14:10				80.53	20200730	04:00 - 04:10
95.23	20191226	15:00 - 15:10				81.405	20200730	05:00 - 05:10
93.32	20191226	16:00 - 16:10				81.65	20200730	06:00 - 06:10
89.07	20191226	17:00 - 17:10				81.83	20200730	07:00 - 07:10
88.785	20191226	18:00 - 18:10				83.74	20200730	08:00 - 08:10
89.51	20191226	19:00 - 19:10				81.76	20200730	09:00 - 09:10
90.435	20191226	20:00 - 20:10				84.1	20200730	10:00 - 10:10
91.73	20191226	21:00 - 21:10				84.785	20200730	11:00 - 11:10
89.93	20191226	22:00 - 22:10				83.575	20200730	12:00 - 12:10
89.42	20191226	23:00 - 23:10				82.065	20200730	13:00 - 13:10
87.68	20191227	00:00 - 00:10				80.715	20200730	14:00 - 14:10
85.67	20191227	01:00 - 01:10				80.845	20200730	15:00 - 15:10
91.365	20191227	02:00 - 02:10				84.225	20200730	16:00 - 16:10
87.195	20191227	03:00 - 03:10				82.825	20200730	17:00 - 17:10
90.845	20191227	04:00 - 04:10				84.11	20200730	18:00 - 18:10
88.005	20191227	05:00 - 05:10				85.415	20200730	19:00 - 19:10
88.6	20191227	06:00 - 06:10				82.19	20200730	20:00 - 20:10
87.615	20191227	07:00 - 07:10				85.28	20200730	21:00 - 21:10
88.525	20191227	08:00 - 08:10				81.765	20200730	22:00 - 22:10
89.69	20191227	09:00 - 09:10				80.085	20200730	23:00 - 23:10
90.605	20191227	10:00 - 10:10				79.465	20200731	00:00 - 00:10
89.96	20191227	11:00 - 11:10				79.655	20200731	01:00 - 01:10
89.38	20191227	12:00 - 12:10				81.87	20200731	02:00 - 02:10
89.995	20191227	13:00 - 13:10				81.36	20200731	03:00 - 03:10
90.815	20191227	14:00 - 14:10				80.315	20200731	04:00 - 04:10
94.725	20191227	15:00 - 15:10				82.2	20200731	05:00 - 05:10
92.25	20191227	16:00 - 16:10				83.315	20200731	06:00 - 06:10
90.68	20191227	17:00 - 17:10				81.81	20200731	07:00 - 07:10
88.84	20191227	18:00 - 18:10				82.695	20200731	08:00 - 08:10
90.355	20191227	19:00 - 19:10				83.49	20200731	09:00 - 09:10
90.78	20191227	20:00 - 20:10				83.93	20200731	10:00 - 10:10
88.41	20191227	21:00 - 21:10				85.02	20200731	11:00 - 11:10
89.8	20191227	22:00 - 22:10				83.645	20200731	12:00 - 12:10
89.8	20191227	23:00 - 23:10				87.505	20200731	13:00 - 13:10
89.18	20191231	00:00 - 00:10				83.05	20200731	14:00 - 14:10
86.315	20191231	01:00 - 01:10				83.575	20200731	15:00 - 15:10
87.4	20191231	02:00 - 02:10				82.26	20200731	16:00 - 16:10
89.37	20191231	03:00 - 03:10				84.205	20200731	17:00 - 17:10
88.48	20191231	04:00 - 04:10				83.52	20200731	18:00 - 18:10
85.94	20191231	05:00 - 05:10				85.17	20200731	19:00 - 19:10
86.45	20191231	06:00 - 06:10				84.46	20200731	20:00 - 20:10
85.58	20191231	07:00 - 07:10				85.395	20200731	21:00 - 21:10
91.2	20191231	08:00 - 08:10				84.065	20200731	22:00 - 22:10
86.66	20191231	09:00 - 09:10				86.205	20200731	23:00 - 23:10
88.85	20191231	10:00 - 10:10				86.005	20200801	00:00 - 00:10
89.19	20191231	11:00 - 11:10				85.575	20200801	01:00 - 01:10
88.73	20191231	12:00 - 12:10				83.485	20200801	02:00 - 02:10
90.92	20191231	13:00 - 13:10				83.555	20200801	03:00 - 03:10
92.12	20191231	14:00 - 14:10				83.69	20200801	04:00 - 04:10
88.315	20191231	15:00 - 15:10				85.065	20200801	05:00 - 05:10
88.725	20191231	16:00 - 16:10				85.71	20200801	06:00 - 06:10
91.24	20191231	17:00 - 17:10				85.7	20200801	07:00 - 07:10
91.925	20191231	18:00 - 18:10				85.015	20200801	08:00 - 08:10
90.345	20191231	19:00 - 19:10				84.62	20200801	09:00 - 09:10
87.545	20191231	20:00 - 20:10				85.605	20200801	10:00 - 10:10
85.495	20191231	21:00 - 21:10				85.32	20200801	11:00 - 11:10
85.5	20191231	22:00 - 22:10				87.165	20200801	12:00 - 12:10
91.19	20191231	23:00 - 23:10				87.44	20200801	13:00 - 13:10
86.08	20200101	00:00 - 00:10				86.435	20200801	14:00 - 14:10
87.385	20200101	01:00 - 01:10				87.78	20200801	15:00 - 15:10
82.965	20200101	02:00 - 02:10				87.63	20200801	16:00 - 16:10
86.58	20200101	03:00 - 03:10				87.19	20200801	17:00 - 17:10
84.335	20200101	04:00 - 04:10				86.975	20200801	18:00 - 18:10
83.99	20200101	05:00 - 05:10				87.245	20200801	19:00 - 19:10
84.325	20200101	06:00 - 06:10				86.04	20200801	20:00 - 20:10
84.43	20200101	07:00 - 07:10				86.56	20200801	21:00 - 21:10
88.055	20200101	08:00 - 08:10				87.575	20200801	22:00 - 22:10
88.06	20200101	09:00 - 09:10				87.43	20200801	23:00 - 23:10
87.54	20200101	10:00 - 10:10				88.02	20200802	00:00 - 00:10
84.345	20200101	11:00 - 11:10				87.25	20200802	01:00 - 01:10
85.225	20200101	12:00 - 12:10				88.35	20200802	02:00 - 02:10
85.815	20200101	13:00 - 13:10				90.71	20200802	03:00 - 03:10
89.06	20200101	14:00 - 14:10				86.925	20200802	04:00 - 04:10
85.33	20200101	15:00 - 15:10				87.365	20200802	05:00 - 05:10
89.72	20200101	16:00 - 16:10				86.95	20200802	06:00 - 06:10
90.315	20200101	17:00 - 17:10				88.1	20200802	07:00 - 07:10
90.695	20200101	18:00 - 18:10				86.985	20200802	08:00 - 08:10
89.085	20200101	19:00 - 19:10				87.1	20200802	09:00 - 09:10
85.51	20200101	20:00 - 20:10				86.7	20200802	10:00 - 10:10
84.5	20200101	21:00 - 21:10				87.4	20200802	11:00 - 11:10
85.615	20200101	22:00 - 22:10				87.47	20200802	12:00 - 12:10
88.985	20200101	23:00 - 23:10				88.15	20200802	13:00 - 13:10
90.155	20200102	00:00 - 00:10				86.735	20200802	14:00 - 14:10
84.33	20200102	01:00 - 01:10				85.655	20200802	15:00 - 15:10
84.445	20200102	02:00 - 02:10				87.705	20200802	16:00 - 16:10
85.06	20200102	03:00 - 03:10				87.295	20200802	17:00 - 17:10
82.98	20200102	04:00 - 04:10				85.285	20200802	18:00 - 18:10
83.125	20200102	05:00 - 05:10				85.875	20200802	19:00 - 19:10
85.805	20200102	06:00 - 06:10				90.08	20200802	20:00 - 20:10
88.34	20200102	07:00 - 07:10				86.585	20200802	21:00 - 21:10
86.745	20200102	08:00 - 08:10				87.945	20200802	22:00 - 22:10
86.06	20200102	09:00 - 09:10				88.57	20200802	23:00 - 23:10
84.565	20200102	10:00 - 10:10				89.13	20200803	00:00 - 00:10
85.595	20200102	11:00 - 11:10				87.785	20200803	01:00 - 01:10
85.35	20200102	12:00 - 12:10				86.575	20200803	02:00 - 02:10
85.305	20200102	13:00 - 13:10				86.625	20200803	03:00 - 03:10
89.59	20200102	14:00 - 14:10				98.075	20200803	04:00 - 04:10
85.525	20200102	15:00 - 15:10				88.34	20200803	05:00 - 05:10
86.62	20200102	16:00 - 16:10				86.915	20200803	06:00 - 06:10
85.995	20200102	17:00 - 17:10				84.75	20200803	07:00 - 07:10
88.38	20200102	18:00 - 18:10				88.525	20200803	08:00 - 08:10
91.695	20200102	19:00 - 19:10				86.94	20200803	09:00 - 09:10
86.25	20200102	20:00 - 20:10				88.85	20200803	10:00 - 10:10
87.52	20200102	21:00 - 21:10				86.43	20200803	11:00 - 11:10
86.065	20200102	22:00 - 22:10				90.33	20200803	12:00 - 12:10
85.485	20200102	23:00 - 23:10				87.67	20200803	13:00 - 13:10
86.975	20200103	00:00 - 00:10				86.65	20200803	14:00 - 14:10
84.245	20200103	01:00 - 01:10				86.805	20200803	15:00 - 15:10
87.48	20200103	02:00 - 02:10				86.88	20200803	16:00 - 16:10
85.995	20200103	03:00 - 03:10				88.07	20200803	17:00 - 17:10
86.7	20200103	04:00 - 04:10				87.26	20200803	18:00 - 18:10
92.87	20200103	05:00 - 05:10				85.515	20200803	19:00 - 19:10
89.105	20200103	06:00 - 06:10				87.185	20200803	20:00 - 20:10
90.065	20200103	07:00 - 07:10				89.345	20200803	21:00 - 21:10
86.125	20200103	08:00 - 08:10				88.525	20200803	22:00 - 22:10
91.25	20200103	09:00 - 09:10				88.885	20200803	23:00 - 23:10
87.78	20200103	10:00 - 10:10				89.025	20200804	00:00 - 00:10
90.88	20200103	11:00 - 11:10				89.81	20200804	01:00 - 01:10
88.42	20200103	12:00 - 12:10				88.095	20200804	02:00 - 02:10
86.44	20200103	13:00 - 13:10				86.585	20200804	03:00 - 03:10
85.28	20200103	14:00 - 14:10				86.07	20200804	04:00 - 04:10
86.4	20200103	15:00 - 15:10				84.695	20200804	05:00 - 05:10
88.555	20200103	16:00 - 16:10				85.875	20200804	06:00 - 06:10
88.67	20200103	17:00 - 17:10				85.225	20200804	07:00 - 07:10
90.4	20200103	18:00 - 18:10				85.175	20200804	08:00 - 08:10
93.455	20200103	19:00 - 19:10				85.02	20200804	09:00 - 09:10
93.665	20200103	20:00 - 20:10				86.025	20200804	10:00 - 10:10
88.56	20200103	21:00 - 21:10				84.905	20200804	11:00 - 11:10
86.895	20200103	22:00 - 22:10				85.195	20200804	12:00 - 12:10
86.635	20200103	23:00 - 23:10				84.23	20200804	13:00 - 13:10
87.085	20200104	00:00 - 00:10				85.435	20200804	14:00 - 14:10
87.035	20200104	01:00 - 01:10				86.655	20200804	15:00 - 15:10
86.94	20200104	02:00 - 02:10				89.465	20200804	16:00 - 16:10
86.145	20200104	03:00 - 03:10				93.08	20200804	17:00 - 17:10
87.335	20200104	04:00 - 04:10				86.18	20200804	18:00 - 18:10
86.4	20200104	05:00 - 05:10				84.94	20200804	19:00 - 19:10
89.665	20200104	06:00 - 06:10				85.025	20200804	20:00 - 20:10
90.28	20200104	07:00 - 07:10				87	20200804	21:00 - 21:10
92.025	20200104	08:00 - 08:10				85.09	20200804	22:00 - 22:10
89.21	20200104	09:00 - 09:10				83.01	20200804	23:00 - 23:10
89.195	20200104	10:00 - 10:10				84.645	20200805	00:00 - 00:10
89.445	20200104	11:00 - 11:10				81.32	20200805	01:00 - 01:10
90.03	20200104	12:00 - 12:10				84.17	20200805	02:00 - 02:10
88.285	20200104	13:00 - 13:10				83.025	20200805	03:00 - 03:10
90.335	20200104	14:00 - 14:10				86.335	20200805	04:00 - 04:10
86.915	20200104	15:00 - 15:10				83.65	20200805	05:00 - 05:10
88.345	20200104	16:00 - 16:10				84.195	20200805	06:00 - 06:10
88.04	20200104	17:00 - 17:10				83.495	20200805	07:00 - 07:10
89.265	20200104	18:00 - 18:10				81.9	20200805	08:00 - 08:10
88.56	20200104	19:00 - 19:10				85.425	20200805	09:00 - 09:10
86.03	20200104	20:00 - 20:10				81.76	20200805	10:00 - 10:10
86.335	20200104	21:00 - 21:10				81.805	20200805	11:00 - 11:10
89.605	20200104	22:00 - 22:10				83.05	20200805	12:00 - 12:10
86.45	20200104	23:00 - 23:10				83.97	20200805	13:00 - 13:10
86.945	20200105	00:00 - 00:10				84.79	20200805	14:00 - 14:10
89.97	20200105	01:00 - 01:10				88.57	20200805	15:00 - 15:10
91.505	20200105	02:00 - 02:10				86.66	20200805	16:00 - 16:10
90.83	20200105	03:00 - 03:10				88.265	20200805	17:00 - 17:10
88.935	20200105	04:00 - 04:10				88.245	20200805	18:00 - 18:10
84.76	20200105	05:00 - 05:10				88.24	20200805	19:00 - 19:10
88.795	20200105	06:00 - 06:10				88.54	20200805	20:00 - 20:10
85.405	20200105	07:00 - 07:10				90.095	20200805	21:00 - 21:10
86.51	20200105	08:00 - 08:10				88.675	20200805	22:00 - 22:10
88.325	20200105	09:00 - 09:10				85.175	20200805	23:00 - 23:10
91.445	20200105	10:00 - 10:10				87.095	20200806	00:00 - 00:10
93.63	20200105	11:00 - 11:10				83.46	20200806	01:00 - 01:10
89.53	20200105	12:00 - 12:10				85.145	20200806	02:00 - 02:10
94.72	20200105	13:00 - 13:10				84.89	20200806	03:00 - 03:10
88.885	20200105	14:00 - 14:10				86.645	20200806	04:00 - 04:10
88.925	20200105	15:00 - 15:10				83.47	20200806	05:00 - 05:10
88.2	20200105	16:00 - 16:10				85.995	20200806	06:00 - 06:10
90.33	20200105	17:00 - 17:10				86.05	20200806	07:00 - 07:10
91.58	20200105	18:00 - 18:10				85.43	20200806	08:00 - 08:10
91.635	20200105	19:00 - 19:10				90.655	20200806	09:00 - 09:10
91.13	20200105	20:00 - 20:10				89.74	20200806	10:00 - 10:10
87.225	20200105	21:00 - 21:10				88.05	20200806	11:00 - 11:10
91.11	20200105	22:00 - 22:10				88.555	20200806	12:00 - 12:10
86.505	20200105	23:00 - 23:10				87.82	20200806	13:00 - 13:10
88.41	20200106	00:00 - 00:10				87.405	20200806	14:00 - 14:10
87.42	20200106	01:00 - 01:10				88.73	20200806	15:00 - 15:10
91.18	20200106	02:00 - 02:10				85.755	20200806	16:00 - 16:10
87.36	20200106	03:00 - 03:10				85.585	20200806	17:00 - 17:10
87.28	20200106	04:00 - 04:10				84.995	20200806	18:00 - 18:10
86.47	20200106	05:00 - 05:10				85.38	20200806	19:00 - 19:10
87.13	20200106	06:00 - 06:10				83.83	20200806	20:00 - 20:10
87.375	20200106	07:00 - 07:10				95.815	20200806	21:00 - 21:10
93.315	20200106	08:00 - 08:10				85.405	20200806	22:00 - 22:10
89.76	20200106	09:00 - 09:10				86.455	20200806	23:00 - 23:10
87.8	20200106	10:00 - 10:10				85.835	20200807	00:00 - 00:10
96.03	20200106	11:00 - 11:10				82.56	20200807	01:00 - 01:10
90.205	20200106	12:00 - 12:10				83.27	20200807	02:00 - 02:10
94.655	20200106	13:00 - 13:10				82.39	20200807	03:00 - 03:10
92.065	20200106	14:00 - 14:10				83.43	20200807	04:00 - 04:10
86.48	20200106	15:00 - 15:10				84.1	20200807	05:00 - 05:10
86.435	20200106	16:00 - 16:10				89.555	20200807	06:00 - 06:10
88.72	20200106	17:00 - 17:10				83.23	20200807	07:00 - 07:10
93.225	20200106	18:00 - 18:10				84.42	20200807	08:00 - 08:10
88.48	20200106	19:00 - 19:10				83.17	20200807	09:00 - 09:10
87.105	20200106	20:00 - 20:10				82.675	20200807	10:00 - 10:10
87.665	20200106	21:00 - 21:10				85.02	20200807	11:00 - 11:10
87.75	20200106	22:00 - 22:10				87.15	20200807	12:00 - 12:10
94.59	20200106	23:00 - 23:10				85.125	20200807	13:00 - 13:10
90.045	20200107	00:00 - 00:10				86.175	20200807	14:00 - 14:10
89.575	20200107	01:00 - 01:10				87.94	20200807	15:00 - 15:10
88.815	20200107	02:00 - 02:10				84.4	20200807	16:00 - 16:10
87.41	20200107	03:00 - 03:10				84.17	20200807	17:00 - 17:10
86.96	20200107	04:00 - 04:10				83.75	20200807	18:00 - 18:10
86.735	20200107	05:00 - 05:10				87.64	20200807	19:00 - 19:10
87.925	20200107	06:00 - 06:10				84.905	20200807	20:00 - 20:10
90.035	20200107	07:00 - 07:10				90.145	20200807	21:00 - 21:10
89.385	20200107	08:00 - 08:10				84.395	20200807	22:00 - 22:10
87.995	20200107	09:00 - 09:10				85.205	20200807	23:00 - 23:10
87.735	20200107	10:00 - 10:10				84.965	20200808	00:00 - 00:10
89.955	20200107	11:00 - 11:10				81.085	20200808	01:00 - 01:10
86.355	20200107	12:00 - 12:10				81.29	20200808	02:00 - 02:10
87.815	20200107	13:00 - 13:10				82.09	20200808	03:00 - 03:10
85.31	20200107	14:00 - 14:10				80.53	20200808	04:00 - 04:10
84.965	20200107	15:00 - 15:10				82.78	20200808	05:00 - 05:10
86.13	20200107	16:00 - 16:10				82.165	20200808	06:00 - 06:10
85.105	20200107	17:00 - 17:10				83.855	20200808	07:00 - 07:10
88.215	20200107	18:00 - 18:10				79.325	20200808	08:00 - 08:10
89.23	20200107	19:00 - 19:10				80.31	20200808	09:00 - 09:10
92.99	20200107	20:00 - 20:10				84.39	20200808	10:00 - 10:10
92.755	20200107	21:00 - 21:10				84.13	20200808	11:00 - 11:10
93.88	20200107	22:00 - 22:10				86.205	20200808	12:00 - 12:10
92.185	20200107	23:00 - 23:10				88.08	20200808	13:00 - 13:10
90.365	20200108	00:00 - 00:10				95.72	20200808	14:00 - 14:10
86.82	20200108	01:00 - 01:10				90.945	20200808	15:00 - 15:10
86.415	20200108	02:00 - 02:10				82.17	20200808	16:00 - 16:10
86.1	20200108	03:00 - 03:10				82.57	20200808	17:00 - 17:10
88.955	20200108	04:00 - 04:10				84.325	20200808	18:00 - 18:10
91.28	20200108	05:00 - 05:10				88.765	20200808	19:00 - 19:10
90.24	20200108	06:00 - 06:10				87.88	20200808	20:00 - 20:10
89.945	20200108	07:00 - 07:10				96.95	20200808	21:00 - 21:10
88.34	20200108	08:00 - 08:10				83.865	20200808	22:00 - 22:10
86.525	20200108	09:00 - 09:10				82.5	20200808	23:00 - 23:10
86.89	20200108	10:00 - 10:10				88.185	20200809	00:00 - 00:10
86.805	20200108	11:00 - 11:10				81.755	20200809	01:00 - 01:10
85.14	20200108	12:00 - 12:10				82.9	20200809	02:00 - 02:10
86.625	20200108	13:00 - 13:10				81.79	20200809	03:00 - 03:10
86.15	20200108	14:00 - 14:10				81.655	20200809	04:00 - 04:10
85.74	20200108	15:00 - 15:10				79.785	20200809	05:00 - 05:10
86.89	20200108	16:00 - 16:10				86.305	20200809	06:00 - 06:10
88.395	20200108	17:00 - 17:10				81.86	20200809	07:00 - 07:10
92.9	20200108	18:00 - 18:10				80.445	20200809	08:00 - 08:10
89.41	20200108	19:00 - 19:10				80.685	20200809	09:00 - 09:10
92.11	20200108	20:00 - 20:10				82.46	20200809	10:00 - 10:10
89.83	20200108	21:00 - 21:10				85.665	20200809	11:00 - 11:10
92.05	20200108	22:00 - 22:10				84.2	20200809	12:00 - 12:10
89.955	20200108	23:00 - 23:10				85.085	20200809	13:00 - 13:10
89.4	20200109	00:00 - 00:10				87.05	20200809	14:00 - 14:10
91.545	20200109	01:00 - 01:10				85.53	20200809	15:00 - 15:10
88.405	20200109	02:00 - 02:10				85.42	20200809	16:00 - 16:10
88.41	20200109	03:00 - 03:10				84.97	20200809	17:00 - 17:10
87.725	20200109	04:00 - 04:10				84.37	20200809	18:00 - 18:10
91.525	20200109	05:00 - 05:10				84.675	20200809	19:00 - 19:10
91.915	20200109	06:00 - 06:10				82.365	20200809	20:00 - 20:10
90.62	20200109	07:00 - 07:10				99.505	20200809	21:00 - 21:10
92.69	20200109	08:00 - 08:10				85.78	20200809	22:00 - 22:10
89.75	20200109	09:00 - 09:10				84.625	20200809	23:00 - 23:10
89.88	20200109	10:00 - 10:10				84.935	20200810	00:00 - 00:10
89.295	20200109	11:00 - 11:10				88.115	20200810	01:00 - 01:10
91.645	20200109	12:00 - 12:10				83.425	20200810	02:00 - 02:10
89.645	20200109	13:00 - 13:10				79.97	20200810	03:00 - 03:10
90.415	20200109	14:00 - 14:10				80.285	20200810	04:00 - 04:10
90.27	20200109	15:00 - 15:10				79.45	20200810	05:00 - 05:10
97.24	20200109	16:00 - 16:10				83.62	20200810	06:00 - 06:10
92.315	20200109	17:00 - 17:10				83.43	20200810	07:00 - 07:10
92.565	20200109	18:00 - 18:10				79.63	20200810	08:00 - 08:10
97.395	20200109	19:00 - 19:10				80.93	20200810	09:00 - 09:10
91.57	20200109	20:00 - 20:10				81.785	20200810	10:00 - 10:10
90.57	20200109	21:00 - 21:10				86.265	20200810	11:00 - 11:10
90.75	20200109	22:00 - 22:10				83.885	20200810	12:00 - 12:10
89.22	20200109	23:00 - 23:10				87.335	20200810	13:00 - 13:10
92.115	20200110	00:00 - 00:10				85.425	20200810	14:00 - 14:10
91.765	20200110	01:00 - 01:10				84.515	20200810	15:00 - 15:10
92.74	20200110	02:00 - 02:10				84.52	20200810	16:00 - 16:10
89.825	20200110	03:00 - 03:10				85.51	20200810	17:00 - 17:10
91.655	20200110	04:00 - 04:10				83.76	20200810	18:00 - 18:10
91.855	20200110	05:00 - 05:10				84	20200810	19:00 - 19:10
90.935	20200110	06:00 - 06:10				82.755	20200810	20:00 - 20:10
90.645	20200110	07:00 - 07:10				96.33	20200810	21:00 - 21:10
93	20200110	08:00 - 08:10				82.895	20200810	22:00 - 22:10
90.62	20200110	09:00 - 09:10				82.39	20200810	23:00 - 23:10
91.635	20200110	10:00 - 10:10				81.48	20200811	00:00 - 00:10
94.82	20200110	11:00 - 11:10				81.415	20200811	01:00 - 01:10
92.5	20200110	12:00 - 12:10				80.01	20200811	02:00 - 02:10
90.185	20200110	13:00 - 13:10				80.505	20200811	03:00 - 03:10
90.51	20200110	14:00 - 14:10				81.1	20200811	04:00 - 04:10
90.795	20200110	15:00 - 15:10				87.105	20200811	05:00 - 05:10
91.415	20200110	16:00 - 16:10				82.835	20200811	06:00 - 06:10
91.74	20200110	17:00 - 17:10				82.445	20200811	07:00 - 07:10
91.355	20200110	18:00 - 18:10				82.17	20200811	08:00 - 08:10
92.68	20200110	19:00 - 19:10				80.66	20200811	09:00 - 09:10
90.805	20200110	20:00 - 20:10				81.31	20200811	10:00 - 10:10
91.525	20200110	21:00 - 21:10				82.41	20200811	11:00 - 11:10
91.57	20200110	22:00 - 22:10				83.13	20200811	12:00 - 12:10
89.58	20200110	23:00 - 23:10				84.44	20200811	13:00 - 13:10
91.15	20200111	00:00 - 00:10				86.29	20200811	14:00 - 14:10
90.7	20200111	01:00 - 01:10				84.89	20200811	15:00 - 15:10
88.845	20200111	02:00 - 02:10				84.845	20200811	16:00 - 16:10
89.73	20200111	03:00 - 03:10				86.375	20200811	17:00 - 17:10
89.26	20200111	04:00 - 04:10				82.08	20200811	18:00 - 18:10
89.565	20200111	05:00 - 05:10				85.22	20200811	19:00 - 19:10
92.83	20200111	06:00 - 06:10				85.495	20200811	20:00 - 20:10
91.9	20200111	07:00 - 07:10				91.965	20200811	21:00 - 21:10
88.605	20200111	08:00 - 08:10				89.585	20200811	22:00 - 22:10
90.665	20200111	09:00 - 09:10				87	20200811	23:00 - 23:10
89.82	20200111	10:00 - 10:10				82.27	20200812	00:00 - 00:10
89.77	20200111	11:00 - 11:10				85.565	20200812	01:00 - 01:10
90.62	20200111	12:00 - 12:10				84.14	20200812	02:00 - 02:10
90.13	20200111	13:00 - 13:10				86.16	20200812	03:00 - 03:10
90.275	20200111	14:00 - 14:10				84.39	20200812	04:00 - 04:10
89.27	20200111	15:00 - 15:10				83.96	20200812	05:00 - 05:10
90.05	20200111	16:00 - 16:10				84.11	20200812	06:00 - 06:10
89.66	20200111	17:00 - 17:10				83.14	20200812	07:00 - 07:10
91.265	20200111	18:00 - 18:10				81.67	20200812	08:00 - 08:10
92.925	20200111	19:00 - 19:10				84.385	20200812	09:00 - 09:10
89.11	20200111	20:00 - 20:10				81.93	20200812	10:00 - 10:10
87.715	20200111	21:00 - 21:10				80.68	20200812	11:00 - 11:10
87.77	20200111	22:00 - 22:10				80.535	20200812	12:00 - 12:10
88.27	20200111	23:00 - 23:10				81.06	20200812	13:00 - 13:10
88.535	20200112	00:00 - 00:10				83.875	20200812	14:00 - 14:10
90.93	20200112	01:00 - 01:10				87.835	20200812	15:00 - 15:10
89.39	20200112	02:00 - 02:10				84.505	20200812	16:00 - 16:10
89.915	20200112	03:00 - 03:10				83.015	20200812	17:00 - 17:10
88.7	20200112	04:00 - 04:10				83.005	20200812	18:00 - 18:10
87.925	20200112	05:00 - 05:10				82.875	20200812	19:00 - 19:10
91.465	20200112	06:00 - 06:10				82.35	20200812	20:00 - 20:10
89.985	20200112	07:00 - 07:10				93.285	20200812	21:00 - 21:10
88.78	20200112	08:00 - 08:10				82.335	20200812	22:00 - 22:10
91.055	20200112	09:00 - 09:10				86.12	20200812	23:00 - 23:10
90.03	20200112	10:00 - 10:10				85.09	20200813	00:00 - 00:10
91.72	20200112	11:00 - 11:10				88.07	20200813	01:00 - 01:10
90.64	20200112	12:00 - 12:10				85.335	20200813	02:00 - 02:10
89.97	20200112	13:00 - 13:10				83.985	20200813	03:00 - 03:10
88.72	20200112	14:00 - 14:10				82.285	20200813	04:00 - 04:10
89.84	20200112	15:00 - 15:10				81.3	20200813	05:00 - 05:10
90.09	20200112	16:00 - 16:10				83.92	20200813	06:00 - 06:10
91.825	20200112	17:00 - 17:10				79.735	20200813	07:00 - 07:10
90.755	20200112	18:00 - 18:10				81.115	20200813	08:00 - 08:10
94.045	20200112	19:00 - 19:10				80.645	20200813	09:00 - 09:10
93.08	20200112	20:00 - 20:10				81.185	20200813	10:00 - 10:10
90.87	20200112	21:00 - 21:10				82.965	20200813	11:00 - 11:10
90.19	20200112	22:00 - 22:10				81.335	20200813	12:00 - 12:10
88.59	20200112	23:00 - 23:10				84.515	20200813	13:00 - 13:10
89.27	20200113	00:00 - 00:10				81.94	20200813	14:00 - 14:10
88.475	20200113	01:00 - 01:10				83.715	20200813	15:00 - 15:10
89.85	20200113	02:00 - 02:10				83.65	20200813	16:00 - 16:10
88.445	20200113	03:00 - 03:10				81.215	20200813	17:00 - 17:10
90.94	20200113	04:00 - 04:10				82.885	20200813	18:00 - 18:10
89.97	20200113	05:00 - 05:10				82.085	20200813	19:00 - 19:10
89.54	20200113	06:00 - 06:10				82.555	20200813	20:00 - 20:10
90.02	20200113	07:00 - 07:10				93.51	20200813	21:00 - 21:10
89.6	20200113	08:00 - 08:10				82.285	20200813	22:00 - 22:10
87.855	20200113	09:00 - 09:10				81.8	20200813	23:00 - 23:10
86.76	20200113	10:00 - 10:10				81.415	20200814	00:00 - 00:10
89.72	20200113	11:00 - 11:10				81.345	20200814	01:00 - 01:10
87.77	20200113	12:00 - 12:10				82.325	20200814	02:00 - 02:10
88.8	20200113	13:00 - 13:10				80.945	20200814	03:00 - 03:10
88.355	20200113	14:00 - 14:10				80.885	20200814	04:00 - 04:10
89.535	20200113	15:00 - 15:10				87.02	20200814	05:00 - 05:10
91.545	20200113	16:00 - 16:10				86.695	20200814	06:00 - 06:10
92.575	20200113	17:00 - 17:10				82.54	20200814	07:00 - 07:10
91.28	20200113	18:00 - 18:10				81.73	20200814	08:00 - 08:10
93.7	20200113	19:00 - 19:10				84.09	20200814	09:00 - 09:10
92.025	20200113	20:00 - 20:10				82.715	20200814	10:00 - 10:10
91.84	20200113	21:00 - 21:10				82.295	20200814	11:00 - 11:10
100.485	20200113	22:00 - 22:10				83.375	20200814	12:00 - 12:10
90.08	20200113	23:00 - 23:10				87.825	20200814	13:00 - 13:10
89.33	20200114	00:00 - 00:10				81.615	20200814	14:00 - 14:10
88.32	20200114	01:00 - 01:10				84.77	20200814	15:00 - 15:10
89.26	20200114	02:00 - 02:10				85.195	20200814	16:00 - 16:10
88.24	20200114	03:00 - 03:10				85.245	20200814	17:00 - 17:10
90.48	20200114	04:00 - 04:10				84.265	20200814	18:00 - 18:10
92.77	20200114	05:00 - 05:10				84.575	20200814	19:00 - 19:10
90.51	20200114	06:00 - 06:10				86.71	20200814	20:00 - 20:10
89.925	20200114	07:00 - 07:10				91.56	20200814	21:00 - 21:10
89.875	20200114	08:00 - 08:10				82.97	20200814	22:00 - 22:10
88.78	20200114	09:00 - 09:10				84.83	20200814	23:00 - 23:10
88.275	20200114	10:00 - 10:10				82.235	20200815	00:00 - 00:10
90.155	20200114	11:00 - 11:10				84.935	20200815	01:00 - 01:10
90.52	20200114	12:00 - 12:10				82.205	20200815	02:00 - 02:10
88.27	20200114	13:00 - 13:10				82.56	20200815	03:00 - 03:10
91.735	20200114	14:00 - 14:10				85.01	20200815	04:00 - 04:10
89.345	20200114	15:00 - 15:10				81.165	20200815	05:00 - 05:10
90.42	20200114	16:00 - 16:10				85.63	20200815	06:00 - 06:10
90.175	20200114	17:00 - 17:10				86.14	20200815	07:00 - 07:10
88.88	20200114	18:00 - 18:10				83.025	20200815	08:00 - 08:10
90.665	20200114	19:00 - 19:10				83.24	20200815	09:00 - 09:10
90.16	20200114	20:00 - 20:10				84.135	20200815	10:00 - 10:10
88.765	20200114	21:00 - 21:10				83.11	20200815	11:00 - 11:10
95.02	20200114	22:00 - 22:10				83.07	20200815	12:00 - 12:10
88.12	20200114	23:00 - 23:10				83.725	20200815	13:00 - 13:10
89.455	20200115	00:00 - 00:10				83.99	20200815	14:00 - 14:10
90.805	20200115	01:00 - 01:10				82.955	20200815	15:00 - 15:10
85.305	20200115	02:00 - 02:10				83.16	20200815	16:00 - 16:10
84.23	20200115	03:00 - 03:10				84.25	20200815	17:00 - 17:10
87.815	20200115	04:00 - 04:10				82.83	20200815	18:00 - 18:10
84.455	20200115	05:00 - 05:10				83.03	20200815	19:00 - 19:10
89.7	20200115	06:00 - 06:10				84.48	20200815	20:00 - 20:10
86.865	20200115	07:00 - 07:10				87.12	20200815	21:00 - 21:10
88.57	20200115	08:00 - 08:10				84.855	20200815	22:00 - 22:10
88.885	20200115	09:00 - 09:10				81.99	20200815	23:00 - 23:10
88.095	20200115	10:00 - 10:10				81.77	20200816	00:00 - 00:10
85.845	20200115	11:00 - 11:10				81.64	20200816	01:00 - 01:10
87.19	20200115	12:00 - 12:10				81.565	20200816	02:00 - 02:10
86.845	20200115	13:00 - 13:10				80.33	20200816	03:00 - 03:10
86.87	20200115	14:00 - 14:10				80.32	20200816	04:00 - 04:10
90.31	20200115	15:00 - 15:10				84.35	20200816	05:00 - 05:10
90.85	20200115	16:00 - 16:10				84.83	20200816	06:00 - 06:10
93.075	20200115	17:00 - 17:10				82.415	20200816	07:00 - 07:10
88.185	20200115	18:00 - 18:10				83.655	20200816	08:00 - 08:10
91.795	20200115	19:00 - 19:10				85.515	20200816	09:00 - 09:10
89.15	20200115	20:00 - 20:10				87.82	20200816	10:00 - 10:10
87.51	20200115	21:00 - 21:10				92.995	20200816	11:00 - 11:10
85.885	20200115	22:00 - 22:10				90.64	20200816	12:00 - 12:10
93.12	20200115	23:00 - 23:10				85.47	20200816	13:00 - 13:10
88.445	20200116	00:00 - 00:10				82.405	20200816	14:00 - 14:10
96.745	20200116	01:00 - 01:10				81.48	20200816	15:00 - 15:10
92.465	20200116	02:00 - 02:10				82.435	20200816	16:00 - 16:10
88.09	20200116	03:00 - 03:10				83.43	20200816	17:00 - 17:10
89.59	20200116	04:00 - 04:10				81.855	20200816	18:00 - 18:10
88.4	20200116	05:00 - 05:10				84.43	20200816	19:00 - 19:10
87.355	20200116	06:00 - 06:10				81.9	20200816	20:00 - 20:10
88.2	20200116	07:00 - 07:10				88.59	20200816	21:00 - 21:10
87.86	20200116	08:00 - 08:10				82.585	20200816	22:00 - 22:10
88.06	20200116	09:00 - 09:10				81.95	20200816	23:00 - 23:10
86.93	20200116	10:00 - 10:10				81.235	20200817	00:00 - 00:10
88.025	20200116	11:00 - 11:10				82.465	20200817	01:00 - 01:10
86.66	20200116	12:00 - 12:10				82.39	20200817	02:00 - 02:10
88.7	20200116	13:00 - 13:10				82.795	20200817	03:00 - 03:10
89.96	20200116	14:00 - 14:10				81.22	20200817	04:00 - 04:10
91.625	20200116	15:00 - 15:10				82.52	20200817	05:00 - 05:10
94.39	20200116	16:00 - 16:10				82.24	20200817	06:00 - 06:10
93.835	20200116	17:00 - 17:10				83.505	20200817	07:00 - 07:10
93.235	20200116	18:00 - 18:10				80.215	20200817	08:00 - 08:10
92.49	20200116	19:00 - 19:10				82.02	20200817	09:00 - 09:10
90.59	20200116	20:00 - 20:10				80.665	20200817	10:00 - 10:10
92.355	20200116	21:00 - 21:10				80.01	20200817	11:00 - 11:10
90.805	20200116	22:00 - 22:10				80.205	20200817	12:00 - 12:10
93.8	20200116	23:00 - 23:10				82.125	20200817	13:00 - 13:10
90.28	20200117	00:00 - 00:10				79.465	20200817	14:00 - 14:10
91.76	20200117	01:00 - 01:10				81.005	20200817	15:00 - 15:10
89.065	20200117	02:00 - 02:10				83.05	20200817	16:00 - 16:10
91.65	20200117	03:00 - 03:10				82.745	20200817	17:00 - 17:10
85.505	20200117	04:00 - 04:10				87.59	20200817	18:00 - 18:10
89.575	20200117	05:00 - 05:10				83.74	20200817	19:00 - 19:10
88.46	20200117	06:00 - 06:10				83.73	20200817	20:00 - 20:10
91.65	20200117	07:00 - 07:10				86.475	20200817	21:00 - 21:10
88.085	20200117	08:00 - 08:10				82.515	20200817	22:00 - 22:10
93.005	20200117	09:00 - 09:10				80.47	20200817	23:00 - 23:10
88.885	20200117	10:00 - 10:10				85.53	20200818	00:00 - 00:10
88.355	20200117	11:00 - 11:10				84.03	20200818	01:00 - 01:10
91.065	20200117	12:00 - 12:10				81.395	20200818	02:00 - 02:10
92.475	20200117	13:00 - 13:10				85.685	20200818	03:00 - 03:10
93.61	20200117	14:00 - 14:10				82.555	20200818	04:00 - 04:10
94.905	20200117	15:00 - 15:10				84.315	20200818	05:00 - 05:10
96.505	20200117	16:00 - 16:10				86.585	20200818	06:00 - 06:10
94.895	20200117	17:00 - 17:10				83.245	20200818	07:00 - 07:10
93.795	20200117	18:00 - 18:10				80.135	20200818	08:00 - 08:10
96.455	20200117	19:00 - 19:10				82.79	20200818	09:00 - 09:10
93.9	20200117	20:00 - 20:10				80.825	20200818	10:00 - 10:10
93.695	20200117	21:00 - 21:10				79.755	20200818	11:00 - 11:10
93.275	20200117	22:00 - 22:10				81.09	20200818	12:00 - 12:10
93.025	20200117	23:00 - 23:10				84.145	20200818	13:00 - 13:10
96.38	20200118	00:00 - 00:10				83.615	20200818	14:00 - 14:10
92.04	20200118	01:00 - 01:10				83.84	20200818	15:00 - 15:10
91.495	20200118	02:00 - 02:10				87.985	20200818	16:00 - 16:10
90.36	20200118	03:00 - 03:10				84.975	20200818	17:00 - 17:10
90.47	20200118	04:00 - 04:10				83.985	20200818	18:00 - 18:10
91.92	20200118	05:00 - 05:10				84.885	20200818	19:00 - 19:10
93.92	20200118	06:00 - 06:10				84.035	20200818	20:00 - 20:10
92.74	20200118	07:00 - 07:10				86.38	20200818	21:00 - 21:10
92.36	20200118	08:00 - 08:10				80.635	20200818	22:00 - 22:10
91.685	20200118	09:00 - 09:10				80.735	20200818	23:00 - 23:10
90.38	20200118	10:00 - 10:10				81.275	20200819	00:00 - 00:10
91.01	20200118	11:00 - 11:10				81.96	20200819	01:00 - 01:10
91.395	20200118	12:00 - 12:10				83.605	20200819	02:00 - 02:10
92.265	20200118	13:00 - 13:10				82.66	20200819	03:00 - 03:10
92.225	20200118	14:00 - 14:10				85.58	20200819	04:00 - 04:10
94.68	20200118	15:00 - 15:10				84.055	20200819	05:00 - 05:10
95.285	20200118	16:00 - 16:10				86.33	20200819	06:00 - 06:10
92.255	20200118	17:00 - 17:10				83.48	20200819	07:00 - 07:10
91.835	20200118	18:00 - 18:10				84.565	20200819	08:00 - 08:10
100.9	20200118	19:00 - 19:10				83.915	20200819	09:00 - 09:10
96.95	20200118	20:00 - 20:10				84.805	20200819	10:00 - 10:10
93.94	20200118	21:00 - 21:10				85.515	20200819	11:00 - 11:10
92.835	20200118	22:00 - 22:10				83.435	20200819	12:00 - 12:10
92.88	20200118	23:00 - 23:10				83.91	20200819	13:00 - 13:10
93.865	20200119	00:00 - 00:10				82.06	20200819	14:00 - 14:10
91.945	20200119	01:00 - 01:10				83.09	20200819	15:00 - 15:10
90.305	20200119	02:00 - 02:10				84.2	20200819	16:00 - 16:10
91.415	20200119	03:00 - 03:10				81.895	20200819	17:00 - 17:10
91.9	20200119	04:00 - 04:10				82.335	20200819	18:00 - 18:10
88.575	20200119	05:00 - 05:10				83.905	20200819	19:00 - 19:10
92.98	20200119	06:00 - 06:10				84.61	20200819	20:00 - 20:10
87.95	20200119	07:00 - 07:10				84.08	20200819	21:00 - 21:10
85.835	20200119	08:00 - 08:10				82.165	20200819	22:00 - 22:10
85.835	20200119	09:00 - 09:10				83.615	20200819	23:00 - 23:10
87.96	20200119	10:00 - 10:10				85.84	20200820	00:00 - 00:10
88.205	20200119	11:00 - 11:10				85.63	20200820	01:00 - 01:10
88.26	20200119	12:00 - 12:10				85.2	20200820	02:00 - 02:10
89.725	20200119	13:00 - 13:10				82.65	20200820	03:00 - 03:10
91.915	20200119	14:00 - 14:10				81.745	20200820	04:00 - 04:10
94.63	20200119	15:00 - 15:10				83.075	20200820	05:00 - 05:10
95.685	20200119	16:00 - 16:10				82.84	20200820	06:00 - 06:10
92.215	20200119	17:00 - 17:10				82.635	20200820	07:00 - 07:10
90.82	20200119	18:00 - 18:10				81.385	20200820	08:00 - 08:10
95.22	20200119	19:00 - 19:10				83.66	20200820	09:00 - 09:10
90.425	20200119	20:00 - 20:10				84.145	20200820	10:00 - 10:10
84.295	20200119	21:00 - 21:10				83.295	20200820	11:00 - 11:10
86.25	20200119	22:00 - 22:10				84.04	20200820	12:00 - 12:10
87.07	20200119	23:00 - 23:10				82.49	20200820	13:00 - 13:10
86.175	20200120	00:00 - 00:10				82.63	20200820	14:00 - 14:10
89.84	20200120	01:00 - 01:10				83.285	20200820	15:00 - 15:10
87.4	20200120	02:00 - 02:10				82.965	20200820	16:00 - 16:10
84.82	20200120	03:00 - 03:10				82.8	20200820	17:00 - 17:10
85.46	20200120	04:00 - 04:10				83.375	20200820	18:00 - 18:10
86.08	20200120	05:00 - 05:10				85.455	20200820	19:00 - 19:10
87.635	20200120	06:00 - 06:10				86.625	20200820	20:00 - 20:10
88.47	20200120	07:00 - 07:10				86.165	20200820	21:00 - 21:10
85.555	20200120	08:00 - 08:10				83.655	20200820	22:00 - 22:10
87.89	20200120	09:00 - 09:10				81.825	20200820	23:00 - 23:10
88.03	20200120	10:00 - 10:10				84.465	20200821	00:00 - 00:10
91.785	20200120	11:00 - 11:10				83.835	20200821	01:00 - 01:10
89.855	20200120	12:00 - 12:10				81.585	20200821	02:00 - 02:10
90.725	20200120	13:00 - 13:10				81.53	20200821	03:00 - 03:10
92.06	20200120	14:00 - 14:10				80.735	20200821	04:00 - 04:10
96.065	20200120	15:00 - 15:10				81.39	20200821	05:00 - 05:10
96.445	20200120	16:00 - 16:10				84.165	20200821	06:00 - 06:10
92.765	20200120	17:00 - 17:10				82.38	20200821	07:00 - 07:10
90.505	20200120	18:00 - 18:10				84.23	20200821	08:00 - 08:10
88.68	20200120	19:00 - 19:10				80.9	20200821	09:00 - 09:10
85.75	20200120	20:00 - 20:10				82.195	20200821	10:00 - 10:10
93.365	20200120	21:00 - 21:10				83.02	20200821	11:00 - 11:10
84.825	20200120	22:00 - 22:10				82.92	20200821	12:00 - 12:10
85.535	20200120	23:00 - 23:10				87.73	20200821	13:00 - 13:10
87.505	20200121	00:00 - 00:10				83.63	20200821	14:00 - 14:10
91.295	20200121	01:00 - 01:10				82.795	20200821	15:00 - 15:10
85.375	20200121	02:00 - 02:10				81.81	20200821	16:00 - 16:10
85.445	20200121	03:00 - 03:10				82.045	20200821	17:00 - 17:10
88.76	20200121	04:00 - 04:10				83.045	20200821	18:00 - 18:10
86.175	20200121	05:00 - 05:10				82.26	20200821	19:00 - 19:10
87.24	20200121	06:00 - 06:10				82.94	20200821	20:00 - 20:10
92.69	20200121	07:00 - 07:10				86.15	20200821	21:00 - 21:10
87.435	20200121	08:00 - 08:10				82.91	20200821	22:00 - 22:10
89.465	20200121	09:00 - 09:10				81.045	20200821	23:00 - 23:10
87.435	20200121	10:00 - 10:10				84.025	20200822	00:00 - 00:10
90.065	20200121	11:00 - 11:10				82.82	20200822	01:00 - 01:10
88.275	20200121	12:00 - 12:10				82.465	20200822	02:00 - 02:10
91	20200121	13:00 - 13:10				81.82	20200822	03:00 - 03:10
91.655	20200121	14:00 - 14:10				80.15	20200822	04:00 - 04:10
95.15	20200121	15:00 - 15:10				80.015	20200822	05:00 - 05:10
96.04	20200121	16:00 - 16:10				82.43	20200822	06:00 - 06:10
89.94	20200121	17:00 - 17:10				81.535	20200822	07:00 - 07:10
89.595	20200121	18:00 - 18:10				79.965	20200822	08:00 - 08:10
93.145	20200121	19:00 - 19:10				81.645	20200822	09:00 - 09:10
88.2	20200121	20:00 - 20:10				83.73	20200822	10:00 - 10:10
90.885	20200121	21:00 - 21:10				82.475	20200822	11:00 - 11:10
88.33	20200121	22:00 - 22:10				83.265	20200822	12:00 - 12:10
88.58	20200121	23:00 - 23:10				83.84	20200822	13:00 - 13:10
87.155	20200122	00:00 - 00:10				80.985	20200822	14:00 - 14:10
88.81	20200122	01:00 - 01:10				81.775	20200822	15:00 - 15:10
88.52	20200122	02:00 - 02:10				83.37	20200822	16:00 - 16:10
87.75	20200122	03:00 - 03:10				81.285	20200822	17:00 - 17:10
86.905	20200122	04:00 - 04:10				86.265	20200822	18:00 - 18:10
87.16	20200122	05:00 - 05:10				84.6	20200822	19:00 - 19:10
88.745	20200122	06:00 - 06:10				81.31	20200822	20:00 - 20:10
92.145	20200122	07:00 - 07:10				83.25	20200822	21:00 - 21:10
91.7	20200122	08:00 - 08:10				80.35	20200822	22:00 - 22:10
90.72	20200122	09:00 - 09:10				80.67	20200822	23:00 - 23:10
91.035	20200122	10:00 - 10:10				87.305	20200823	00:00 - 00:10
89.95	20200122	11:00 - 11:10				83.105	20200823	01:00 - 01:10
90.115	20200122	12:00 - 12:10				82.715	20200823	02:00 - 02:10
90.715	20200122	13:00 - 13:10				84.155	20200823	03:00 - 03:10
91.03	20200122	14:00 - 14:10				82.02	20200823	04:00 - 04:10
94.965	20200122	15:00 - 15:10				82.17	20200823	05:00 - 05:10
96.08	20200122	16:00 - 16:10				82.085	20200823	06:00 - 06:10
91.555	20200122	17:00 - 17:10				81.905	20200823	07:00 - 07:10
91.89	20200122	18:00 - 18:10				81.29	20200823	08:00 - 08:10
93.625	20200122	19:00 - 19:10				81.46	20200823	09:00 - 09:10
93.045	20200122	20:00 - 20:10				81.82	20200823	10:00 - 10:10
93.505	20200122	21:00 - 21:10				82.035	20200823	11:00 - 11:10
94.175	20200122	22:00 - 22:10				82.395	20200823	12:00 - 12:10
91.395	20200122	23:00 - 23:10				82.67	20200823	13:00 - 13:10
90.685	20200123	00:00 - 00:10				83.535	20200823	14:00 - 14:10
93.54	20200123	01:00 - 01:10				82.945	20200823	15:00 - 15:10
93.645	20200123	02:00 - 02:10				83.18	20200823	16:00 - 16:10
91.525	20200123	03:00 - 03:10				84.6	20200823	17:00 - 17:10
93.36	20200123	04:00 - 04:10				86.225	20200823	18:00 - 18:10
91.315	20200123	05:00 - 05:10				84.62	20200823	19:00 - 19:10
90.94	20200123	06:00 - 06:10				85.545	20200823	20:00 - 20:10
[truncated: 1,182 more rows]

## Sheet: Figure 2
Locations pre-COVID-19			Locations during-COVID-19
Latitude	Longitude		Latitude	Longitude
25.794	-77.2579		26.0104	-76.6
25.7283	-77.4563		25.7819	-78.398
25.7137	-76.9153		26.0554	-77.8969
25.6265	-77.6476		25.3922	-79.2243
25.7559	-77.6988		26.0556	-78.6832
25.7547	-77.7766		26.018	-78.187
25.6213	-77.0211		26.7481	-76.6921
25.8388	-77.911		25.8069	-78.4424
25.6183	-77.6359		25.7823	-78.3213
26.2187	-76.9732		25.0782	-77.3258
25.7486	-77.3801		25.6412	-76.556
25.8392	-77.7728		25.5753	-77.5458
25.455	-77.5274		25.8034	-78.4125
25.9742	-78.1409		25.7409	-78.1253
25.8715	-77.7956		25.7463	-78.4195
25.9505	-77.8942		26.0224	-78.1284
25.8143	-77.1038		25.8101	-78.1845
25.8187	-76.1241		25.965	-76.233
27.2156	-77.8449		25.9942	-77.9366
25.9797	-78.0865		26.1068	-79.1071
26.1015	-78.5102		26.0675	-79.1436
26.0103	-78.3111		26.14	-78.4969
25.8876	-77.8321		26.0208	-79.1835
26.0886	-78.7132		25.4921	-75.6788
26.3109	-78.5249		26.5199	-78.7963
26.2008	-78.4133		25.7755	-78.2324
26.1958	-78.3813		26.0614	-79.1694
25.9864	-77.9524		25.4774	-75.83
25.0858	-77.3645		26.4888	-78.8054
27.0096	-76.487		25.9957	-75.8318
25.5448	-78.331		25.3209	-77.4479
25.7881	-76.4492		26.1929	-76.9696
25.7562	-76.9751		25.2467	-79.4725
25.7992	-76.8918		25.7548	-78.1675
25.7279	-77.1827		25.7756	-78.2012
25.7033	-77.5714		26.0878	-79.1109
25.7018	-76.847		25.7782	-78.0533
25.8439	-77.8638		26.5148	-78.7903
26.0055	-77.6839		25.036	-77.6557
25.5818	-77.5355		26.4957	-78.2592
25.7936	-77.2631		25.959	-79.5638
25.8264	-77.7822		25.5956	-79.4915
25.7974	-77.543		25.7774	-78.1673
25.9486	-77.7409		26.081	-79.1269
25.9117	-77.0757		25.0783	-77.325
25.4276	-77.0987		26.8056	-75.0528
25.9236	-78.0962		25.8645	-79.2602
25.4889	-77.548		25.8863	-79.2523
25.9568	-77.9304		25.5992	-79.5408
26.1957	-77.0041		24.9854	-77.5247
25.9337	-77.0737		26.0852	-79.1433
25.5628	-77.1925		26.0912	-79.0788
26.0298	-77.0134		26.5309	-78.7727
25.724	-77.0257		26.124	-79.0838
25.8939	-76.9181		26.5205	-78.7678
25.7823	-77.8232		26.5068	-78.7775
25.6933	-77.0723		26.5215	-78.7698
25.6749	-77.1185		26.5013	-78.7717
25.6383	-77.1796		26.5226	-78.7654
26.1383	-78.0825		26.523	-78.8055
25.8156	-77.7704		25.0807	-77.3388
25.8148	-77.7226		26.5006	-78.7686
25.7237	-77.0152		26.3728	-78.996
25.7428	-76.9057		26.0177	-75.5986
25.9186	-78.0673		26.5208	-78.762
25.9348	-76.5084		91	181
26.0853	-77.9501		26.521	-78.7623
25.9803	-77.9811		25.1388	-77.1829
26.0545	-77.9063		25.9905	-79.4165
25.7143	-77.0147		26.2689	-79.1981
26.0132	-77.8978		26.4159	-79.093
25.6697	-77.7082		26.3765	-79.0057
25.7115	-76.8401		25.8143	-78.0996
25.9841	-77.8323		26.5013	-78.7739
25.9499	-77.9305		26.5223	-78.7644
25.9709	-77.7681		26.5202	-78.7609
25.8337	-77.702		25.0774	-77.3257
25.9003	-77.8455		25.0786	-77.3245
25.8126	-77.501		27.4587	-80.3234
25.8412	-76.9277		25.8282	-78.3422
25.7431	-76.9628		25.8242	-75.915
25.9257	-77.8561		26.0274	-79.4678
25.6878	-77.6727		24.9973	-77.5583
25.6161	-77.351		25.0778	-77.3254
25.9178	-75.419		26.1072	-79.3245
26.0422	-78.0175		25.7868	-78.4242
25.9493	-77.0838		24.7535	-75.6461
25.7718	-77.1065		25.3991	-76.2894
25.943	-77.9682		91	181
25.9303	-77.9838		26.6578	-79.3842
25.9133	-77.934		26.0745	-79.4358
25.301	-75.6421		26.2653	-79.4282
25.7239	-76.94		26.0936	-80.1128
25.8995	-76.8987		26.5809	-79.2411
25.8863	-77.7565		25.7853	-77.3761
25.93	-76.8787		25.7829	-77.054
25.4296	-77.3694		25.9245	-76.6767
26.0907	-77.0401		25.7252	-77.1817
25.9378	-77.985		25.8918	-77.4765
25.9703	-76.2662		25.765	-77.3513
26.3706	-76.1717		25.9609	-77.8037
26.0117	-78.0322		25.9823	-77.7991
25.8021	-77.6437		25.904	-77.109
25.8822	-77.8927		25.8271	-76.6791
25.9602	-75.9164		25.9176	-77.8554
25.8362	-77.8443		25.8683	-77.7216
26.0774	-78.0632		25.9521	-77.9073
25.8896	-78.0763		25.8915	-77.9328
25.9475	-77.9284		25.9638	-76.7134
25.8749	-77.8776		25.9807	-77.921
25.1981	-76.3583		25.7168	-76.9034
27.1794	-76.678		25.8243	-77.9356
26.1235	-77.998		26.1039	-77.0199
25.7322	-76.8594		25.779	-76.8208
25.7889	-77.1219		26.0308	-78.0298
25.8703	-77.716		25.8871	-76.9276
25.6492	-77.6773		25.8933	-76.8598
26.1128	-79.3		25.7487	-76.9978
26.318	-76.9344		25.7506	-77.1292
25.7292	-77.0367		25.8983	-77.7124
25.7223	-77.2487		25.9418	-77.7592
25.9614	-77.9251		25.528	-77.5413
26.5233	-78.7732		25.5125	-77.4506
26.4784	-78.8246		25.7568	-77.6473
26.2475	-78.713		25.9132	-78.0087
25.594	-77.5425		25.937	-77.8701
25.7747	-77.0672		25.9247	-77.8382
25.4021	-77.4262		25.9324	-77.9704
25.8719	-77.8372		25.8243	-77.9356
25.6084	-77.1174		25.7316	-76.9184
26.437	-78.8043		25.7381	-76.9676
26.2373	-76.9682		25.876	-77.8724
25.9845	-77.9903		25.9466	-77.777
25.509	-77.4991		25.9965	-77.9447
25.5841	-77.6116		25.7161	-77.0015
25.6898	-77.1554		25.8187	-77.818
25.6825	-77.35		25.7413	-78.1249
25.9825	-77.927		25.8098	-76.801
26.2833	-79.1099		26.1391	-77.9792
26.3052	-78.9037		26.1104	-79.2071
27.7013	-78.2651		25.5035	-77.564
25.8675	-76.9159		25.6368	-77.5843
25.8971	-77.8497		25.741	-78.1254
26.5206	-78.7678		25.7293	-76.9587
26.4758	-78.8324		25.7967	-77.7273
26.625	-78.2286		26.135	-78.0379
25.8656	-77.1296		25.7867	-78.3436
25.8058	-76.8454		26.3027	-78.4497
25.8118	-77.7335		25.831	-76.5037
25.9366	-77.9646		26.4047	-78.7115
28.0087	-77.3584		25.7614	-78.4294
25.7907	-76.8282		26.1083	-79.4693
28.0298	-77.3762		25.8876	-76.4614
27.8559	-77.6045		26.4256	-78.7506
26.0066	-78.0043		25.3274	-75.4429
26.5294	-78.7642		26.1065	-79.1063
26.5243	-78.769		26.1697	-78.9062
26.3133	-78.3152		26.288	-78.6389
26.5431	-77.065		26.2431	-76.4762
25.9392	-79.339		25.6539	-77.1279
26.2933	-79.1101		25.0604	-75.8539
26.4571	-78.9162		26.5183	-78.8764
25.699	-79.4823		26.1682	-76.2024
26.1913	-79.2166		25.8243	-77.9356
25.5065	-77.5703		26.4083	-79.4492
25.9341	-76.7832		26.0216	-78.183
26.544	-77.0633		26.676	-79.4374
26.2167	-78.958		26.1109	-77.9837
25.8877	-78.0928		26.5167	-78.7912
26.0328	-77.9488		26.455	-78.7384
27.4158	-79.4065		26.1284	-76.1382
25.9079	-77.7905		25.9112	-77.7687
25.9475	-76.8087		25.7325	-77.0202
26.0224	-77.901		25.8966	-76.2765
25.7662	-76.9168		25.7303	-77.1648
25.5558	-76.959		26.4123	-76.6304
25.7552	-77.1834		25.972	-78.1011
25.8398	-77.7723		26.0499	-78.0623
25.9439	-78.0962		25.8091	-78.1858
25.9473	-78.0369		25.6745	-77.4157
25.9134	-77.6505		25.7697	-78.0661
25.9858	-77.9613		25.776	-78.1356
25.9524	-76.8994		25.7749	-78.2025
25.6743	-76.4144		25.763	-76.7643
25.7192	-77.0193		25.6904	-77.7118
26.0562	-77.8788		25.6934	-77.3123
25.6698	-76.8212		25.7084	-77.1796
25.8833	-77.7867		25.6785	-76.5827
25.8284	-77.6214		25.7412	-78.1253
25.8886	-77.7626		26.1837	-78.2615
25.9157	-77.6159		26.0893	-78.2635
25.8514	-76.9545		25.7862	-78.4454
25.6743	-77.0344		25.9507	-78.017
25.7208	-77.2869		25.7749	-78.2025
26.0049	-77.0884		25.809	-78.1858
25.547	-77.5247		26.1997	-76.9765
25.5119	-77.4535		26.0185	-78.0876
25.5572	-77.5035		26.0107	-76.4283
26.2409	-76.98		25.9339	-75.8357
26.2643	-76.9422		25.8696	-76.0852
25.7003	-77.5605		26.0579	-77.9657
25.5831	-77.52		25.6922	-77.6971
25.6421	-77.4983		26.0166	-77.9093
26.0498	-77.9837		25.7665	-77.1339
25.6777	-77.6668		25.8401	-77.6792
25.9065	-77.7619		26.02	-79.1954
26.0657	-77.7573		25.7696	-78.0661
26.073	-78.0653		25.8038	-78.4133
25.6336	-77.6717		26.4502	-78.7467
26.1692	-76.3718		26.2944	-78.8632
25.9377	-78.085		26.473	-78.7505
25.916	-77.9086		26.0569	-75.6366
25.9383	-77.9548		25.7312	-76.8392
25.853	-77.6816		26.4075	-78.867
26.104	-78.085		25.7875	-78.3431
25.9005	-76.1064		25.8415	-78.1686
25.8791	-77.8316		26.2981	-78.5796
25.9057	-77.966		25.7763	-78.1357
26.145	-78.2974		25.7626	-78.4067
25.9241	-77.8795		26.093	-79.1161
26.0768	-78.07		25.7534	-77.6924
25.996	-78.0127		25.7582	-77.0426
25.7543	-76.873		26.3362	-76.9191
25.725	-76.901		26.0382	-77.9457
26.0329	-78.0722		25.8038	-78.4134
26.0433	-77.8738		26.2342	-78.9246
25.6647	-76.852		26.4716	-78.8203
25.6763	-77.701		25.7409	-78.1252
25.5058	-77.5516		26.3503	-78.7844
25.8539	-77.767		26.3655	-79.066
26.0928	-77.9163		26.1732	-75.9935
25.7203	-77.2657		25.775	-78.2025
25.7061	-76.8658		25.7871	-78.3434
25.7906	-76.8725		26.0374	-77.0612
25.7108	-77.002		25.7617	-78.4293
25.9228	-77.4366		25.9962	-77.791
25.5393	-77.5004		25.8142	-77.7691
25.7165	-77.1223		26.1007	-78.0699
25.7994	-77.4826		26.0171	-78.0176
25.5887	-77.5078		25.7279	-77.2441
26.2631	-77.6215		26.2488	-78.4475
25.6343	-77.6084		26.4914	-78.773
25.9901	-76.7163		25.6923	-77.6969
25.5162	-77.2471		26.0944	-79.1157
26.0021	-77.9707		25.8404	-77.6765
26.057	-78.0997		25.8793	-76.9004
25.9743	-78.0092		25.8814	-76.8157
25.9585	-77.976		25.926	-78.0093
25.9781	-78.0668		25.7437	-76.9023
25.7135	-76.6189		27.6938	-77.8636
25.4409	-77.3706		25.6879	-77.2578
26.6265	-76.6052		25.8802	-76.7885
26.4234	-75.653		25.764	-77.1643
25.6666	-76.8974		25.8651	-77.4617
26.5022	-78.8882		25.8407	-77.5191
26.7137	-79.0976		25.9468	-77.6974
27.2024	-77.8143		25.7687	-77.1233
25.7231	-76.9421		25.7883	-77.1028
26.0491	-78.3522		25.9582	-77.9317
26.0432	-78.1771		26.2136	-78.3047
26.2234	-76.4984		25.7298	-76.8614
25.7609	-77.5168		25.7422	-78.1245
25.8887	-77.8586		25.7545	-76.5056
25.9864	-77.8443		26.02	-79.1953
26.1243	-78.4453		25.6912	-77.6956
25.4758	-78.17		26.3872	-78.4258
25.9273	-78.1604		26.094	-79.1163
25.7283	-77.7069		25.7531	-78.1688
25.9108	-77.6573		25.8032	-78.4138
26.0977	-78.0526		25.7631	-78.4074
25.5375	-75.721		25.7554	-78.3802
26.5207	-78.7679		25.8099	-78.1847
26.5207	-78.8081		26.1934	-78.7365
25.5204	-77.5001		25.7519	-78.4393
26.1032	-77.991		25.7879	-78.3422
25.5248	-77.6231		25.7757	-78.2018
25.8726	-77.7293		25.7788	-78.1375
25.775	-76.5756		26.0926	-78.7463
25.6855	-76.9177		25.8052	-78.4414
25.7353	-77.1792		26.0862	-79.1418
26.197	-76.9809		26.382	-78.977
25.8013	-78.8106		26.0815	-79.127
26.037	-77.9255		26.1116	-79.0588
26.0313	-77.8118		26.3986	-78.9968
25.5114	-77.4384		25.7988	-76.0587
25.8982	-77.7878		25.9196	-77.8507
25.9679	-77.7973		25.7677	-77.0069
25.8781	-77.5677		25.7398	-76.9708
25.8991	-77.081		25.8049	-77.175
25.7278	-77.7069		25.946	-77.8917
25.7819	-76.9672		25.9963	-78.0738
26.1279	-78.06		26.0987	-76.6482
26.0514	-77.0241		25.6587	-77.1191
26.4182	-78.5924		25.6971	-76.8434
25.77	-78.2232		26.0187	-78.2987
25.7286	-76.9924		25.8068	-77.5266
25.824	-77.8517		25.747	-77.1214
25.9563	-77.9746		25.7361	-77.2306
26.4247	-78.8727		25.7462	-77.0747
25.8076	-77.6536		25.7424	-78.1243
25.9617	-78.0162		27.5624	-76.0989
25.7252	-76.9442		26.459	-78.0867
25.9219	-77.864		26.2171	-78.591
25.9456	-77.961		26.1002	-78.0149
25.2938	-77.4224		25.9746	-77.9941
25.9236	-77.8945		25.9391	-78.027
26.8612	-76.6251		25.8097	-78.1851
25.8419	-77.9648		26.562	-78.994
25.9883	-78.1083		26.1211	-78.6449
25.7929	-77.729		25.9059	-77.8737
25.8932	-77.8118		26.6095	-76.7909
26.2348	-77.8661		26.3922	-78.8605
25.6817	-77.4695		25.7797	-78.1372
25.7464	-77.1109		25.752	-78.4385
26.212	-78.3805		25.7637	-78.4068
25.8987	-77.8532		25.4752	-76.9371
26.0769	-77.9453		27.3269	-78.1731
25.6905	-76.9754		26.4534	-78.8246
25.752	-76.9128		26.0233	-76.252
25.7243	-77.0949		26.1683	-78.3112
25.716	-76.9302		26.3314	-78.769
26.0535	-78.007		26.5309	-78.7727
25.6885	-77.5581		25.7882	-78.3421
25.7143	-76.9084		25.4034	-79.5679
25.9629	-77.9244		26.0941	-79.1163
25.9802	-78.0406		25.7869	-78.4459
25.8838	-77.7124		26.4072	-78.9339
25.8882	-77.4651		25.7563	-78.3799
25.3629	-77.4362		25.8049	-78.442
25.6884	-77.6574		25.7542	-78.168
25.951	-77.9257		26.1396	-78.4861
25.4913	-77.4785		26.5282	-78.7644
26.0882	-77.0165		25.776	-78.2013
25.8128	-77.7213		26.5255	-78.8073
25.7104	-76.914		25.3708	-79.2161
25.5417	-77.0471		26.179	-78.8303
25.8791	-77.6443		25.9721	-76.6311
25.8318	-77.807		25.1807	-79.5929
25.7167	-77.6802		25.8364	-76.2113
25.8002	-77.1165		25.663	-77.5008
25.7158	-77.7538		27.7923	-78.0269
25.7207	-76.858		26.0204	-79.1948
25.9614	-78.109		25.913	-77.7949
25.6042	-77.6306		25.9922	-79.2066
25.9144	-77.997		25.3939	-79.2234
25.9382	-78.0044		26.5204	-78.7676
25.5003	-75.7089		25.7869	-78.2289
25.9054	-76.8323		26.0852	-79.1442
26.1958	-78.0143		26.1115	-79.0588
25.9365	-77.0838		26.2484	-78.3867
26.0003	-77.88		26.0942	-79.0786
25.6938	-77.0862		26.114	-79.0218
25.7929	-77.0327		26.5008	-79.0373
26.0401	-77.901		26.0458	-79.1908
25.8737	-77.9794		26.061	-79.1705
25.9215	-75.1753		26.0808	-79.1281
25.7305	-77.0262		25.0009	-79.7125
25.2019	-76.3628		24.9832	-79.7005
25.9449	-78.1085		26.5222	-78.7646
25.8162	-76.5308		25.7822	-78.404
25.746	-77.102		26.5206	-78.7678
26.4136	-78.7446		26.5203	-78.7678
26.067	-77.8857		26.4745	-79.2802
25.9616	-77.976		26.5226	-78.7654
26.142	-78.0734		26.521	-78.7623
26.0453	-77.9516		26.5243	-78.7758
25.7133	-77.0683		27.575	-78.6752
26.1206	-77.9783		26.1069	-79.1068
25.8614	-77.7363		25.6492	-79.6255
26.2473	-77.6449		25.8296	-76.7769
25.7564	-77.1076		25.8634	-77.819
25.8236	-77.9359		25.8435	-77.3331
25.7234	-77.0229		26.249	-75.7338
25.8507	-77.6835		25.7306	-76.9562
25.9137	-77.6504		26.0656	-78.1667
26.0171	-77.7897		26.1215	-76.3958
25.8056	-77.3948		25.6648	-76.1203
25.9389	-77.9444		25.9121	-77.7027
26.0276	-77.9984		25.8984	-77.6296
25.9131	-77.272		26.0785	-77.5384
26.1259	-77.0046		25.7994	-78.4148
25.7053	-76.8448		26.4266	-78.0954
26.0344	-78.0744		25.7421	-78.1247
26.3232	-77.5838		26.5244	-78.7689
25.8024	-77.0625		26.1623	-78.5609
26.3938	-78.7432		26.2452	-78.7154
25.7123	-77.108		26.2299	-78.5967
25.7432	-77.1388		26.0747	-78.5924
25.7356	-77.019		26.1078	-78.461
25.7353	-77.1274		26.1505	-78.3155
26.1938	-76.7143		25.809	-78.1857
25.7058	-77.1089		26.4266	-78.9147
25.4405	-77.3705		25.7748	-78.2024
26.048	-77.9299		26.4643	-79.4233
25.6338	-76.895		25.7557	-78.3803
25.9002	-77.8935		25.9509	-77.8604
25.6029	-77.4221		26.341	-78.6895
25.7675	-76.9516		25.7753	-78.1669
26.0473	-77.933		26.082	-78.7199
26.0233	-77.8444		25.79	-78.0536
25.7786	-77.6192		26.299	-78.9568
25.9128	-77.9826		26.0595	-77.9556
25.7264	-76.895		25.9542	-76.0674
26.0349	-77.9167		26.167	-76.9874
25.8282	-77.7477		26.8441	-76.2303
25.7676	-76.7137		25.7792	-78.1374
26.012	-78.1242		25.7177	-76.9004
26.0683	-77.9913		26.2287	-79.1634
25.852	-77.3798		25.7914	-77.358
25.9465	-78.0197		25.7687	-76.8165
25.7516	-76.8335		25.7406	-77.0377
25.7212	-77.0892		25.7792	-78.1375
26.008	-78.0541		26.1669	-78.9275
25.8494	-76.8177		26.5244	-78.7689
25.9538	-77.9236		26.5297	-78.8143
25.9762	-77.8696		26.5299	-78.7637
25.8246	-77.4922		26.5181	-78.7969
26.0153	-77.4173		25.7989	-78.4151
25.5119	-77.4004		25.3532	-75.8221
25.9132	-77.272		26.3499	-78.808
26.109	-78.0573		26.2298	-79.0704
25.4597	-77.4895		25.7669	-78.0725
25.497	-77.119		26.0925	-75.9032
25.499	-77.4733		26.4571	-75.7132
25.5373	-77.5951		26.019	-79.1955
25.9916	-77.8772		26.2196	-76.675
25.5902	-77.3935		25.7888	-77.1461
26.0682	-77.008		26.4805	-76.2582
26.0756	-76.9961		25.7077	-77.1067
25.8978	-77.8293		26.2089	-76.9469
25.6514	-76.9277		25.7863	-77.7489
26.013	-77.8625		25.7488	-77.7009
26.2661	-76.7261		25.8153	-77.7087
25.8405	-76.7443		25.9174	-77.5897
25.8167	-77.8033		25.7419	-78.1248
25.9038	-77.9112		26.0136	-77.8535
25.947	-77.8905		25.9528	-77.7775
25.9916	-77.8194		25.7041	-77.7137
25.9747	-77.9504		26.0528	-77.9405
25.9965	-77.8056		25.711	-77.0737
25.9312	-77.087		25.8193	-77.3884
25.7608	-76.9262		25.759	-77.1317
25.6589	-76.8216		25.8047	-77.729
26.0781	-77.9805		25.9356	-77.8728
25.8167	-76.9336		25.696	-77.6291
25.9801	-78.0534		26.7498	-76.709
25.7642	-77.4551		25.816	-77.0913
25.8727	-77.9293		25.6389	-76.5392
26.2342	-78.9176		25.6523	-77.6954
25.8712	-77.8522		26.0452	-77.8579
26.3465	-79.1417		26.3129	-78.0342
25.7775	-76.965		26.0928	-77.9764
25.9857	-77.9193		25.741	-78.1253
25.7574	-76.8323		25.794	-78.3685
26.019	-78.0353		25.7865	-78.3436
26.202	-77.0553		25.9737	-77.7806
25.7435	-76.9201		25.9447	-77.7623
25.8674	-76.9607		25.6676	-77.2016
25.939	-77.9727		25.9547	-77.9812
25.78	-77.2931		25.7658	-78.0726
25.9258	-77.5889		25.9504	-77.8891
25.9132	-77.272		26.176	-78.8859
26.0156	-77.4175		25.7228	-77.1457
25.9118	-77.8594		25.7635	-77.2021
25.7143	-77.145		26.0199	-77.7202
25.8229	-77.155		25.9033	-77.8399
25.546	-77.5396		25.914	-77.6104
25.3928	-77.4554		25.9618	-77.5856
25.4231	-77.4329		25.8878	-77.7629
25.4535	-77.4963		25.7232	-77.0194
25.6909	-77.282		25.9988	-77.8379
25.8134	-76.6782		25.8763	-77.8815
25.5246	-77.5799		26.0111	-77.9101
25.7736	-76.694		25.8371	-77.7593
25.5274	-77.5016		25.8746	-77.7348
25.9439	-77.9749		25.8417	-76.7593
25.8737	-77.0709		25.9117	-77.6758
25.6075	-77.243		25.7575	-77.7791
25.7631	-77.1306		25.7256	-77.0911
26.0618	-76.9927		25.9579	-77.91
26.0467	-78.4621		25.7334	-77.0422
25.9462	-78.0055		25.7751	-77.0295
25.6012	-77.6373		25.9878	-77.9751
25.9783	-77.959		25.6928	-77.3162
25.9233	-77.9208		25.9197	-77.9146
25.9393	-77.9753		25.7662	-78.0731
25.6752	-77.0141		25.7964	-78.3919
25.9127	-77.8518		25.8713	-77.5359
25.9674	-77.9065		25.8594	-77.4411
26.0161	-77.8866		25.8231	-77.3594
25.865	-76.9249		26.0446	-77.8775
25.7984	-76.9108		25.6914	-77.6953
25.828	-77.7459		25.9967	-77.9295
25.7925	-77.0516		25.6802	-77.7276
25.5223	-77.6212		25.8421	-77.8775
25.7358	-76.9573		25.7719	-77.3052
25.7538	-77.6976		25.8103	-77.4883
26.1233	-78.0668		25.7661	-78.073
25.837	-77.922		26.0177	-77.9915
25.8249	-76.6564		26.0523	-77.9311
25.9388	-77.8642		25.9778	-77.79
26.0075	-77.9952		25.7736	-76.9921
26.024	-77.9423		26.4412	-78.0478
25.5793	-77.4877		25.8104	-76.8008
26.0468	-77.9308		25.8832	-77.6662
25.8927	-76.8675		25.7405	-78.1253
25.7689	-77.0663		25.7856	-77.2606
25.7223	-77.1311		26.1389	-77.9047
25.8008	-77.3747		25.8428	-77.657
25.7941	-77.4648		25.7786	-78.1395
25.7685	-77.4299		25.8167	-78.0758
25.7611	-77.3904		25.8179	-78.0533
25.665	-77.1748		25.6894	-77.6957
25.7865	-77.6563		26.1929	-76.9786
25.9129	-77.2715		26.294	-76.9438
25.9712	-77.9882		25.7398	-78.1252
25.9665	-77.3214		25.8039	-77.4162
25.6795	-77.7155		26.0454	-76.6088
25.7106	-76.9681		26.47	-78.3883
26.1465	-77.028		25.671	-77.2093
25.6227	-77.562		26.0359	-77.955
25.5208	-77.5115		26.2147	-78.2044
25.7572	-77.2512		25.7534	-76.8787
25.7368	-76.9913		25.7225	-76.9546
26.0859	-76.8561		25.982	-78.0248
25.8529	-77.9472		25.8583	-76.7378
26.8515	-76.6265		25.8256	-76.9787
25.4681	-77.5564		25.7199	-76.9347
26.3158	-78.3571		25.8789	-76.7838
25.9861	-77.9802		26.0405	-77.989
26.2398	-76.9829		25.8546	-76.81
26.543	-77.065		25.7015	-77.0639
25.5876	-77.0462		25.6711	-77.6243
25.8143	-76.9175		26.0919	-78.0351
26.0929	-77.0072		25.941	-77.9216
26.0278	-76.4176		25.8034	-77.2759
25.7485	-77.1367		26.3142	-76.5259
26.6376	-76.8533		26.3231	-76.9295
25.9666	-78.1095		25.7349	-77.0438
25.9	-76.8535		25.7173	-76.9691
25.9375	-77.9447		25.7372	-77.1637
25.8162	-77.4884		25.8197	-76.9049
25.8016	-77.7302		26.2287	-76.9627
26.0529	-78.0169		25.8414	-77.8906
25.751	-77.0055		25.8353	-77.8559
25.787	-77.1787		25.9163	-78.0463
26.0481	-77.9247		25.7399	-76.9107
26.0051	-77.9026		25.6918	-77.6955
25.8852	-77.9092		25.8416	-77.6806
25.9555	-77.9969		25.8548	-77.8122
26.0499	-78.0896		25.7594	-77.0171
25.9659	-77.8781		25.9397	-77.87
25.7285	-77.4148		25.7344	-77.1927
25.945	-77.7604		25.836	-67.6003
25.8485	-77.9322		25.8394	-78.0539
26.1632	-78.1026		25.8186	-78.0755
25.9448	-77.847		26.0405	-78.12
25.9618	-78.0233		26.0499	-77.9226
25.7553	-77.0882		25.8131	-77.283
25.788	-76.7238		25.6858	-77.1618
25.9656	-78.0491		25.7814	-77.1341
25.9795	-77.8962		25.8648	-77.3922
25.5958	-76.97		25.7821	-76.969
26.0085	-77.9177		25.739	-76.9423
25.7766	-76.8439		25.8687	-77.8711
25.8752	-76.7998		25.6248	-77.6246
25.727	-76.877		25.7829	-76.7904
26.0825	-77.935		25.8843	-77.1184
26.0036	-77.8679		25.873	-76.8132
25.7068	-76.9506		25.8944	-77.0815
25.7245	-77.0308		25.7561	-77.6345
25.8564	-77.3854		25.9101	-77.936
25.5065	-77.437		25.7758	-78.3755
25.9035	-77.6091		25.7968	-78.3911
25.7585	-77.3952		25.7538	-78.3587
25.9113	-77.2725		25.787	-77.5934
25.6714	-77.1789		25.9876	-78.0881
25.973	-77.806		25.7726	-78.2
25.9859	-77.3713		26.0688	-78.781
25.4363	-77.4706		25.9876	-77.8845
25.9633	-77.9031		25.8899	-77.7833
25.4988	-77.4392		25.6617	-77.1857
26.1	-77.8254		25.6836	-77.2808
26.0669	-77.9019		25.9599	-77.9001
25.9408	-77.8941		26.329	-76.9715
26.058	-77.9914		25.7529	-78.1681
25.9948	-78.0008		25.7787	-78.1414
25.7404	-77.347		25.8162	-78.0748
25.9569	-78.0312		25.7731	-78.1667
25.9797	-77.9775		25.818	-78.0532
25.8718	-76.9789		26.1063	-78.324
25.7214	-76.9627		26.0398	-77.976
25.9767	-78.0687		25.6442	-76.5587
25.7514	-77.1725		26.6539	-76.6341
25.9078	-77.9093		26.3723	-78.756
25.8948	-77.9428		25.7546	-77.3127
26.1358	-78.0559		25.7671	-77.0786
25.6408	-76.9428		25.971	-77.6747
25.8132	-77.7347		26.5899	-76.9226
26.0419	-77.8169		26.6484	-76.6375
25.9726	-77.8352		26.2798	-78.5264
25.9165	-78.0286		25.7988	-78.4167
25.8132	-76.7972		26.0339	-77.0385
25.8265	-77.9345		25.8097	-77.6865
25.7254	-76.9203		26.2249	-78.7684
25.5522	-77.5106		25.7076	-77.1064
25.9066	-77.8796		26.299	-78.9636
25.7177	-77.0199		25.8342	-76.8479
25.8662	-77.6561		25.8126	-76.9583
26.0797	-77.9195		25.8669	-77.8248
25.7353	-76.965		25.8648	-77.8294
25.5334	-77.4417		26.7687	-76.5665
26.0373	-77.8229		25.7947	-77.7653
25.7349	-76.9862		25.8164	-78.0753
25.6343	-77.5774		25.7372	-78.1241
25.9535	-77.9292		25.7534	-78.1688
25.9118	-77.2726		25.8372	-77.8768
25.5173	-77.3975		26.0282	-77.9318
25.5097	-77.5075		26.0468	-77.9068
25.9638	-77.9409		26.7633	-77.156
25.5565	-77.5719		27.9156	-77.3961
26.1459	-78.1121		27.899	-77.7875
25.9746	-78.0301		25.779	-78.1416
26.189	-76.998		28.1694	-77.9968
25.9075	-77.8625		27.9337	-77.9323
25.924	-77.9702		26.1386	-78.1538
25.98	-78.0541		27.9826	-78.115
25.7385	-77.0289		25.8182	-78.0538
25.8833	-77.8094		26.5155	-78.7955
25.7753	-77.2454		26.5297	-78.7627
25.8936	-76.8235		25.732	-76.9253
25.7496	-77.0406		26.3598	-78.7069
25.9407	-76.8211		26.499	-78.7837
25.8318	-76.8939		25.74	-76.9934
25.722	-77.046		26.3191	-78.9736
25.7896	-77.7988		26.0984	-78.7572
25.7576	-77.9112		25.6514	-76.953
25.8038	-77.7371		26.2859	-78.7966
25.9092	-77.8654		26.5206	-78.8049
25.9355	-77.9882		25.773	-78.2024
25.793	-76.7117		26.0137	-78.1372
25.9261	-78.0349		25.9336	-77.8543
25.9159	-77.8439		25.7188	-77.0312
25.9567	-77.9235		26.0334	-77.7804
25.749	-76.9847		25.5176	-77.5366
25.9356	-77.8368		26.0317	-77.8719
25.9653	-78.0374		25.5955	-77.6213
25.7052	-76.881		25.7759	-76.7965
25.7327	-76.8784		25.7789	-76.8605
25.7421	-76.8854		25.7831	-77.1041
25.7527	-76.9425		26.0455	-77.8826
25.9465	-78.0036		25.8181	-78.0543
25.4513	-77.499		25.8513	-76.7375
25.7958	-77.4632		25.7378	-78.1249
25.8912	-77.8001		25.8175	-78.0761
25.8381	-77.5502		26.0859	-76.7497
25.8555	-77.4826		25.9703	-77.7415
25.9867	-77.7327		26.3318	-76.076
25.7665	-77.3432		26.0409	-75.7609
25.8489	-77.6698		25.962	-78.0578
25.5256	-77.5233		25.7443	-77.2954
25.8899	-77.7946		25.7374	-77.1914
25.9119	-77.2728		25.7553	-78.1672
25.7264	-77.7026		25.8115	-76.6787
25.5622	-77.0618		25.7773	-76.7093
25.5427	-77.5006		26.0357	-77.9581
25.8397	-77.7402		26.0643	-77.0399
26.131	-78.0591		26.0388	-75.9408
25.7684	-76.9322		25.9242	-77.9129
25.9856	-76.8294		25.825	-77.428
25.5806	-77.5863		25.895	-77.6307
25.7719	-77.0297		25.8747	-77.6908
25.7449	-77.7704		25.9813	-77.7064
25.9019	-77.7597		25.7496	-77.0485
25.7461	-77.0171		25.772	-78.2024
25.9539	-78.0939		25.618	-77.2201
25.9488	-78.0035		25.7733	-78.1389
25.9398	-77.9877		25.8155	-78.0552
25.6853	-77.4577		25.8161	-78.0757
25.8676	-77.7263		25.7378	-78.124
26.0155	-78.0277		25.7653	-78.0725
25.9529	-77.9577		25.7724	-78.1681
25.9803	-77.6945		25.7525	-78.168
25.6995	-76.97		25.8941	-77.6977
25.905	-78.0549		25.7837	-78.231
25.5204	-77.4709		25.7947	-78.272
26.0659	-78.0151		25.7543	-78.3602
25.9557	-77.6362		25.9461	-76.6896
25.8482	-77.1006		25.7809	-78.3689
25.9044	-76.5762		25.7757	-78.4363
25.7686	-76.9926		25.7687	-78.3998
25.9163	-77.7993		25.7887	-78.0547
25.9947	-77.8714		25.7779	-78.3071
25.7536	-76.8771		25.8032	-78.4482
25.8468	-76.8686		26.137	-76.453
25.7914	-77.2181		25.8631	-76.7911
25.8581	-77.6038		26.3329	-78.4808
25.7673	-77.3879		26.2439	-78.5838
25.9769	-77.9013		25.9816	-78.2492
25.8216	-77.2912		26.339	-78.698
25.9799	-78.0519		26.3635	-78.6952
25.6352	-77.5672		26.5165	-78.7951
25.77	-77.6492		26.5219	-78.7752
25.7222	-77.0236		25.9618	-78.1063
25.967	-77.0251		25.9501	-76.6512
25.5749	-76.9672		25.8048	-77.7592
25.7927	-77.7184		26.1052	-78.6619
25.536	-77.5435		26.2839	-76.2866
25.8389	-77.4438		26.543	-77.065
25.5917	-77.1594		25.9674	-77.8513
26.2096	-78.1865		26.0628	-77.8852
26.2807	-78.9587		26.0766	-76.3227
26.2099	-76.9754		25.7648	-78.1513
25.7187	-76.9339		25.8011	-78.3713
25.707	-77.158		25.9798	-77.9259
26.0637	-77.0009		26.3625	-78.5459
25.8451	-76.9209		25.9585	-77.9447
25.9376	-77.7866		25.9758	-78.0611
25.7094	-77.1056		26.027	-77.9489
26.8336	-75.7678		26.027	-78.0594
26.8451	-75.51		26.0535	-78.3732
25.7827	-77.5892		25.9163	-78.0417
26.061	-75.2902		25.9086	-77.6333
25.8978	-77.8184		25.8406	-77.612
26.6783	-76.4049		25.8609	-76.9724
25.7924	-77.6996		25.8369	-77.7454
26.0269	-77.9234		25.7388	-78.1239
25.9062	-77.9852		26.2646	-78.7167
25.8727	-77.7006		25.7664	-78.0724
26.0601	-77.9932		25.7734	-78.1389
26.107	-78.0924		25.8983	-77.993
25.7339	-77.0271		25.7883	-78.0545
25.9574	-78.0013		25.9703	-77.8542
25.919	-76.6783		25.8172	-78.0759
25.9836	-77.9599		25.7726	-78.2025
26.0984	-77.9893		25.7728	-78.168
25.7402	-76.9663		25.7946	-78.2726
25.7342	-77.0974		25.7533	-78.1679
25.9965	-77.7439		25.8034	-78.4479
25.7874	-77.4056		25.9703	-78.0906
25.8387	-77.5321		25.7978	-78.3928
25.9758	-77.6886		25.7686	-78.3999
25.829	-77.32		26.4427	-78.0208
25.5512	-77.6002		25.7545	-78.36
25.4714	-77.133		25.5085	-77.5868
26.0141	-77.821		25.2588	-77.4513
25.947	-77.0855		25.9075	-77.0818
25.6956	-76.9408		26.0246	-76.6223
26.047	-78.003		25.6855	-77.7106
25.7834	-77.1057		26.2918	-76.9691
25.9402	-77.9613		26.2746	-78.3674
25.7997	-77.1188		25.6332	-76.5118
25.7882	-76.9822		26.0174	-76.3128
25.9628	-77.9409		25.7993	-78.3715
25.9176	-77.988		26.138	-76.3008
26.0401	-78.013		26.2112	-78.4044
25.8929	-77.775		26.6878	-77.1693
25.9102	-77.8383		25.7812	-78.3688
25.393	-77.5666		26.5431	-77.065
25.7642	-76.8258		26.0302	-78.0424
25.6824	-76.8066		25.9192	-77.8501
25.8721	-77.8791		25.7445	-77.0514
25.8729	-76.8649		26.0616	-77.9768
25.8104	-77.5899		25.842	-77.6885
26.055	-78.0061		25.7899	-77.2592
25.9796	-78.0595		25.7439	-77.1875
25.7004	-76.9729		26.2586	-75.9305
25.7884	-76.8901		25.7995	-77.8063
25.9282	-77.8586		26.2957	-76.2236
25.9765	-76.7072		25.9269	-77.0686
25.7719	-76.9475		26.233	-76.3936
25.9705	-77.9787		25.5319	-77.5637
26.0005	-77.9963		26.1291	-76.3492
25.7245	-77.0829		26.5265	-76.2002
25.9311	-77.9712		26.1297	-78.4328
25.8013	-76.8987		25.8243	-77.7252
25.6998	-76.9047		26.2226	-79.003
25.7819	-77.3878		25.8566	-77.6048
25.5711	-77.6627		25.8178	-78.0757
25.8996	-76.8095		25.9623	-77.8632
25.7833	-77.0298		25.8029	-78.4479
25.6945	-76.8933		26.1912	-76.8779
25.809	-76.7737		25.7678	-78.3998
26.0441	-77.9528		25.739	-78.1249
25.886	-77.5999		26.0173	-79.1964
25.8809	-77.6853		25.7965	-78.3926
25.8688	-77.5834		25.6898	-77.6946
25.9502	-77.6457		26.2231	-78.242
25.7749	-77.2778		26.6632	-76.8009
25.9839	-77.7452		26.1434	-76.309
25.4143	-77.4286		26.0852	-79.0848
25.524	-77.1574		26.4412	-78.2703
26.2625	-78.3473		25.7914	-76.8578
25.5168	-77.51		25.692	-76.9431
25.5572	-77.5934		26.1737	-77.0235
26.0681	-76.9675		25.6368	-76.5501
26.0077	-77.9357		25.8427	-77.8506
25.4944	-77.522		26.1226	-78.0301
25.7819	-77.5212		26.3799	-76.9338
25.826	-77.9605		26.1172	-78.0356
26.0096	-78.3073		25.8837	-76.5555
25.984	-76.6128		25.9605	-76.2009
25.9655	-78.0054		26.0309	-77.9813
25.7192	-76.8909		25.8196	-77.4333
26.009	-77.8251		25.8674	-77.5966
25.8853	-77.7603		25.8868	-77.5631
26.0142	-77.8153		26.0284	-77.05
25.4996	-76.6387		26.0089	-77.9162
25.947	-77.8733		25.7916	-76.8337
25.8824	-78.0845		25.9199	-76.7281
26.0027	-77.8492		25.739	-78.125
25.8647	-77.8468		26.0146	-77.8287
25.8597	-76.3705		25.8254	-77.8274
25.8685	-77.9713		25.9748	-77.998
25.8482	-77.9038		25.8415	-77.7845
25.9479	-77.8712		26.2175	-78.0028
25.9648	-78.026		25.818	-78.0757
25.4183	-78.0396		25.9999	-76.2261
25.7222	-77.0947		25.7967	-78.3927
25.7203	-76.9282		25.7994	-78.213
25.7484	-77.1154		25.8702	-77.7515
25.942	-76.4909		26.3158	-78.4054
27.1484	-77.3509		25.7282	-77.2326
25.5562	-77.4132		25.8738	-77.876
26.149	-77.0265		25.7114	-77.631
26.4963	-76.887		25.6821	-77.0309
25.8776	-77.5955		26.0535	-77.9417
25.7553	-77.6297		25.7562	-76.9508
25.6793	-77.4658		25.8386	-77.945
25.8756	-77.787		25.7671	-78.3772
25.8526	-77.7029		25.8512	-76.8708
26.0699	-77.0601		25.7676	-77.0885
25.9744	-77.853		25.9075	-77.9074
26.4181	-76.9012		25.8485	-77.573
25.7725	-76.9602		25.9046	-77.5065
26.0071	-77.9361		25.7251	-77.6472
25.6179	-77.6497		25.7759	-77.1007
25.6406	-77.6205		26.039	-77.7921
26.5431	-77.065		26.448	-76.9533
25.999	-77.9469		26.9011	-75.7257
25.2572	-77.4417		26.429	-76.673
25.4893	-77.4908		25.7385	-78.1252
25.1992	-77.421		25.7969	-78.3926
25.9047	-77.6653		26.0315	-76.0294
25.9372	-77.9503		26.046	-76.2117
25.9229	-77.9172		25.7673	-78.3771
25.8281	-77.7034		26.0406	-78.6734
25.8782	-77.7508		25.3975	-75.4779
26.025	-78.0075		25.4615	-75.8242
25.6618	-76.0314		25.689	-76.668
25.8634	-76.2376		26.1162	-76.1732
25.9425	-77.9427		26.8174	-76.2081
25.9677	-78.0555		25.8415	-77.9561
25.8419	-77.7699		25.8884	-75.8762
25.9803	-78.1669		25.5939	-76.4808
26.0813	-78.0164		25.967	-78.4676
25.8871	-77.9277		25.8428	-78.4175
26.0756	-78.0639		26.2219	-76.3996
25.8915	-77.812		26.511	-78.8903
25.9773	-77.9784		26.1796	-76.9845
26.0378	-78.0742		25.8137	-78.4894
25.717	-77.0901		26.0223	-77.7987
25.6733	-77.1425		26.3666	-78.7546
25.8618	-77.7814		26.0843	-79.1353
26.0077	-78.0179		26.4013	-78.9465
25.6902	-77.0588		26.5166	-78.7949
25.7573	-76.9704		26.2274	-79.458
25.9112	-77.792		25.878	-76.8891
26.0933	-77.9911		25.8255	-77.4736
25.7704	-77.255		25.767	-78.3774
25.884	-77.888		25.8027	-78.4477
25.695	-77.5034		25.7658	-78.0732
25.7362	-76.8984		26.5167	-78.7947
25.7362	-77.0402		25.7383	-78.1251
25.8269	-77.6243		26.2444	-78.8069
25.7171	-77.5951		26.0178	-79.1961
25.73	-77.0328		25.4133	-75.9254
25.7123	-77.0303		25.8125	-77.7373
26.0544	-78.0645		25.7966	-78.3928
25.8882	-76.7981		26.4795	-78.9045
26.0437	-77.8555		26.3291	-78.8056
26.8827	-76.4298		26.2052	-77.7255
25.8624	-76.8644		26.084	-78.7755
26.0415	-77.6993		25.6929	-77.6834
26.8577	-76.3978		25.742	-78.1971
25.7583	-77.2974		25.6443	-77.132
25.9841	-77.83		26.2289	-79.1909
25.8548	-77.6018		25.8135	-76.6092
26.0237	-77.813		26.5175	-78.7899
25.713	-77.6971		26.218	-76.942
25.6852	-76.8044		25.85	-76.7683
25.4534	-77.4722		26.5214	-78.8008
25.5262	-77.5133		26.0834	-79.1387
26.4591	-76.1215		25.7545	-78.3599
25.7207	-76.9137		26.2907	-78.8215
25.9563	-78.0095		25.8143	-78.4901
25.9848	-77.0589		25.7762	-78.4518
26.2004	-78.9628		26.0767	-78.5771
25.3804	-77.3292		25.7666	-77.3769
25.985	-78.0353		25.8235	-78.5116
25.9975	-78.0248		25.4818	-78.2437
25.5955	-77.1822		26.271	-79.1183
25.9439	-77.9111		26.3455	-77.9247
25.7423	-76.7302		26.7008	-79.6835
25.9871	-78.0523		26.6313	-76.7644
25.693	-76.8104		25.3813	-76.2459
25.6538	-76.9228		25.7885	-77.1158
25.8521	-77.7924		25.907	-77.6788
25.9695	-78.0179		25.9483	-77.7004
25.9005	-76.788		25.8265	-77.0342
25.9937	-77.9786		26.5473	-76.2398
25.9056	-77.8861		26.0004	-78.0152
26.0737	-77.9733		27.0263	-76.5415
25.671	-76.8142		25.2985	-77.4629
25.8754	-78.0191		25.7351	-77.0915
25.9154	-77.6937		25.9546	-77.6565
25.6983	-77.7381		26.0642	-77.5318
26.1027	-77.9705		25.8166	-77.4467
25.8036	-77.8362		25.7145	-77.6774
25.5154	-77.4985		25.8032	-78.4476
25.7049	-77.0027		25.7965	-78.3928
26.0933	-77.9488		25.7379	-77.0441
26.1346	-77.0026		25.6103	-77.5831
25.9108	-77.8548		25.784	-77.7142
25.8075	-76.8454		26.5953	-76.0196
25.6318	-77.3071		25.7873	-77.0881
25.6964	-77.0639		25.7097	-77.5184
25.8017	-76.9107		26.5474	-76.5877
25.8548	-76.7689		26.4706	-78.8618
25.9181	-77.8769		25.7523	-76.7292
26.1208	-76.6847		25.76	-77.1359
25.859	-77.5761		25.7224	-77.0285
25.8248	-76.9943		25.7663	-78.0734
25.6657	-77.5885		25.8109	-77.0946
25.8258	-77.707		26.2948	-76.3157
25.7123	-77.6973		25.8686	-78.3911
25.9663	-76.7957		25.7386	-78.1252
25.4125	-77.4205		25.97	-77.7337
25.7449	-77.1558		26.0614	-77.7938
26.034	-77.9699		25.9718	-76.7357
25.7178	-76.9107		26.2201	-78.5313
26.0403	-77.9011		26.2303	-78.6396
25.712	-76.8621		26.7381	-76.277
25.9173	-77.8963		25.7887	-78.421
25.9675	-78.0625		25.9549	-78.2319
25.7853	-77.0238		25.868	-77.8325
26.0021	-77.8833		25.405	-79.2296
25.9659	-77.845		25.7496	-77.0593
26.0091	-78.0053		25.7151	-76.9509
26.033	-76.8166		26.4485	-78.9069
25.625	-77.4576		25.9413	-77.7846
25.9528	-78.0198		25.625	-77.1656
25.7294	-76.838		25.9124	-77.7534
25.7102	-76.7199		25.9496	-77.9598
25.9368	-77.9565		25.9799	-76.7816
25.8103	-76.7635		25.7109	-77.044
26.0459	-78.0404		25.7236	-77.1161
25.9569	-78.0285		25.7486	-77.2429
25.817	-76.6573		25.9191	-76.8088
25.8279	-77.7454		26.0444	-77.9543
26.0723	-78.0216		25.7346	-76.5335
25.819	-76.8325		26.0089	-78.0124
25.7627	-76.7874		26.2223	-76.0675
25.947	-77.9346		25.9735	-77.8541
25.7374	-76.9637		26.0639	-77.5321
25.994	-78.2165		25.7651	-77.2526
25.7822	-76.7629		25.8092	-77.519
26.1196	-77.0279		25.7302	-77.2078
25.9561	-77.8321		25.7651	-77.1814
25.872	-76.8332		25.7382	-78.1254
25.5264	-77.5814		25.7416	-76.8597
25.7328	-77.0487		26.1499	-76.2285
26.0162	-77.8349		26.0264	-77.0541
25.8199	-77.4791		25.7657	-78.0736
25.836	-77.5914		25.7967	-78.3928
25.3852	-77.4402		25.742	-78.1973
25.8519	-77.7927		25.7548	-78.1688
25.6216	-76.9165		25.814	-78.4907
25.4178	-77.4325		26.2096	-76.95
25.476	-77.5112		25.7761	-78.452
25.523	-77.5841		26.3441	-78.5039
25.9198	-77.9354		25.814	-78.0924
26.2989	-78.4465		25.9345	-77.7892
24.9666	-77.7446		26.543	-77.065
26.152	-78.8257		26.3484	-78.0255
25.8077	-76.8746		25.8808	-76.8223
26.2193	-79.0615		25.7293	-77.2968
25.5824	-77.0032		25.7487	-77.7122
25.6837	-77.201		25.8582	-76.8301
26.1279	-78.0071		25.7252	-77.0166
25.7361	-77.1119		25.7781	-77.5977
25.8484	-77.9032		25.876	-77.8902
25.9497	-77.9352		25.9949	-77.8135
25.5602	-77.2577		25.8606	-77.8191
26.0731	-77.8373		25.9449	-77.8668
25.7803	-76.8128		26.0279	-78.017
25.9579	-78.0954		26.0217	-77.8738
25.7708	-77.3765		26.2237	-78.5914
25.9561	-77.7111		25.9558	-77.7449
25.7232	-76.9502		25.6428	-76.55
25.9678	-77.8939		26.2922	-78.8018
25.8435	-77.8226		26.1432	-78.84
26.4594	-75.4027		25.9312	-77.9285
25.7694	-76.8227		26.3497	-78.851
25.9852	-77.9899		25.7467	-76.927
25.8966	-77.9493		26.0021	-77.8397
25.9951	-77.9245		26.5207	-78.8011
25.8451	-77.9256		25.9043	-77.9006
25.8993	-76.0559		25.9815	-77.7486
25.6705	-76.784		26.4808	-78.8847
25.7468	-76.9481		18.461	-66.0931
25.7391	-76.9096		25.7151	-76.9419
25.9735	-77.9622		25.9326	-76.5248
25.9163	-77.8146		25.7638	-77.4096
25.966	-77.9106		25.8039	-76.9176
25.804	-77.3845		25.842	-77.8825
26.0955	-77.9681		26.0242	-77.4058
25.7764	-77.0129		25.8358	-77.7046
25.6833	-76.9261		26.0666	-77.5378
26.0668	-77.8951		25.8256	-77.4945
25.8279	-77.7966		25.8472	-77.4387
25.8642	-77.6203		25.7218	-76.9858
25.6841	-77.0215		25.7295	-77.7596
26.0334	-77.8045		25.7857	-78.3778
25.8251	-77.7831		26.0245	-76.7817
25.9943	-77.9936		25.6571	-77.6727
26.0323	-78.0625		25.9372	-78.0119
25.7133	-77.0178		25.9367	-77.0929
25.7118	-76.8954		25.7654	-78.0739
25.5513	-77.5714		25.7717	-77.0362
25.5023	-77.3566		25.9046	-77.6323
25.7432	-76.9418		25.993	-77.8152
25.7098	-77.0876		25.7377	-77.1809
26.0064	-77.9951		25.7714	-78.4025
25.5035	-77.5178		25.997	-76.8881
25.6916	-77.1766		25.8251	-77.9364
25.5406	-77.561		25.9648	-77.8776
25.3481	-77.3337		25.7782	-76.9956
25.5802	-77.4208		26.4041	-79.1918
25.6529	-77.1297		25.5288	-77.4713
25.737	-77.7657		25.9014	-77.8278
26.028	-77.0135		25.7769	-76.8839
26.117	-77.0139		25.7608	-77.1165
25.7722	-76.9974		25.9314	-77.9773
26.0891	-77.9751		25.8415	-77.6877
25.8223	-76.9123		25.1199	-77.6876
25.6313	-77.6855		25.8146	-78.0528
25.9365	-77.98		26.3558	-78.5923
25.8188	-76.911		26.5356	-75.9051
26.1009	-75.7566		25.7383	-78.1253
26.4411	-76.8381		25.9867	-77.8778
25.6505	-77.4582		25.9208	-77.8255
25.9629	-75.5086		26.4821	-78.8788
25.835	-77.7604		26.4675	-76.1266
25.8783	-76.8751		27.3223	-77.7249
26.0699	-78.003		26.6921	-76.7293
26.2033	-76.9781		26.4698	-78.8315
25.9642	-78.0488		25.9396	-76.5769
25.9724	-77.909		25.8165	-77.7273
25.9281	-77.8367		26.6701	-79.3712
25.9938	-77.8667		26.6198	-79.3857
25.7241	-76.9025		26.5209	-78.8012
25.933	-77.8674		25.7843	-75.8659
25.8079	-76.7615		26.2654	-78.7539
25.7707	-76.9933		25.8112	-77.416
26.0635	-78.0078		26.0668	-77.5377
25.9945	-77.972		25.7182	-77.0863
26.1795	-75.8826		25.9076	-76.7708
25.7778	-77.4168		26.2559	-76.9496
26.0605	-78.135		25.8243	-77.9363
25.7677	-77.3354		25.8599	-78.1509
25.751	-77.2743		26.5211	-78.801
25.8102	-77.6068		25.1474	-77.7704
25.7854	-77.5999		25.6918	-77.6198
26.0755	-77.8077		25.7777	-76.5762
25.8322	-77.6354		26.2638	-78.759
26.0451	-78.0686		25.9451	-77.029
25.5149	-77.254		26.3704	-78.6798
26.1681	-76.13		26.543	-77.065
25.5138	-77.509		26.3305	-78.3829
25.5622	-77.5061		26.3907	-78.7283
25.5504	-77.5988		26.3799	-78.8892
25.766	-76.9121		25.7386	-78.1253
26.1934	-78.541		25.7848	-78.3781
25.7708	-77.1094		26.0026	-75.992
26.1011	-78.019		25.5826	-77.551
26.5769	-76.5201		26.6984	-79.3761
25.9674	-77.9958		25.9091	-76.507
26.2623	-79.1093		26.4685	-78.8358
26.3894	-78.8936		25.8331	-77.6265
25.9118	-77.9663		25.4735	-78.2037
25.9352	-77.9415		26.2438	-75.9992
25.8609	-76.8368		25.8062	-78.4421
26.0977	-77.9595		27.2327	-77.447
25.9216	-77.8112		26.2407	-79.2199
25.8544	-77.691		28.0042	-77.3325
26.5229	-78.8113		25.7387	-78.1984
25.7955	-77.058		26.6197	-79.4475
25.8583	-77.8265		26.4668	-79.2532
25.9579	-78.0773		26.4184	-78.856
26.0415	-77.9872		26.4543	-79.5035
25.6435	-78.5074		25.7001	-77.6989
26.2116	-78.6763		25.3019	-75.8026
25.7426	-76.8731		25.4845	-77.5977
25.8913	-77.7387		27.8703	-77.9889
25.963	-77.8624		26.9982	-76.8319
25.8189	-76.8209		25.5801	-75.8568
25.7646	-77.7509		27.8424	-77.1163
26.0959	-78.0005		26.2793	-78.7166
25.8346	-76.7514		26.1456	-77.0322
25.9595	-77.7722		27.9877	-77.4932
25.7542	-76.9579		25.8002	-77.53
25.8641	-77.8165		26.433	-78.7836
25.7999	-76.801		26.0174	-76.4832
25.7448	-76.9237		26.5063	-78.9921
26.0664	-77.0355		26.0872	-79.1109
25.9718	-78.0617		26.1745	-79.2899
25.7803	-76.8076		26.4578	-78.805
25.9337	-77.9563		26.5198	-78.7745
25.7352	-76.9559		26.0191	-79.1953
25.6837	-76.975		25.4734	-77.6508
25.8058	-77.6993		26.1484	-78.7728
25.793	-77.1285		26.1947	-78.4998
25.8003	-77.3656		25.8823	-76.7125
25.7395	-77.3148		26.4592	-78.8065
25.938	-77.6349		26.1459	-78.5826
25.7441	-77.1528		25.8159	-77.3176
26.1871	-77.8404		26.5163	-78.7891
25.9233	-77.5267		26.0147	-76.5257
25.8226	-77.3633		26.2814	-79.4606
25.7232	-77.6277		27.4587	-80.3234
25.472	-77.4798		25.842	-77.6741
25.4802	-77.4374		26.0667	-77.5376
25.9495	-77.9606		25.8351	-77.5138
25.5382	-77.5805		26.2994	-76.4439
25.4491	-77.4954		25.7854	-78.4073
26.1183	-77.0227		25.7215	-76.9255
25.4854	-77.1585		25.2634	-77.6268
25.9416	-77.9477		27.6166	-79.9822
25.736	-77.0356		26.3996	-78.9229
25.9584	-78.0928		25.8215	-77.8266
25.9616	-77.8649		26.361	-79.1508
25.7872	-76.8196		28.6486	-78.9884
25.5678	-77.3653		28.2641	-79.8766
26.1382	-76.9697		26.1589	-78.6372
26.1622	-76.992		25.774	-77.204
25.9382	-77.9837		25.8055	-78.4767
25.8196	-77.7672		26.2967	-78.3643
25.5068	-77.0952		26.3156	-78.7894
25.9162	-77.8758		26.2023	-78.6609
25.9749	-77.9961		26.1829	-78.5295
25.8228	-77.1518		26.2765	-78.7619
25.6788	-76.8748		26.2051	-79.2248
25.8735	-77.8433		27.9534	-76.5422
25.6565	-77.2276		25.8615	-76.5757
25.7766	-77.778		26.3185	-78.8725
26.0126	-77.9039		26.3906	-78.6273
25.9172	-77.9334		27.4772	-79.6021
26.3512	-75.7414		25.8064	-78.4419
25.7264	-76.8998		25.9783	-77.693
25.6427	-76.9396		27.8068	-78.1021
26.006	-77.8633		26.3036	-78.7176
25.9513	-78.0273		26.7691	-80.0504
25.5709	-77.5264		25.7382	-78.1252
26.1147	-78.0101		26.5267	-78.8135
25.1335	-79.5114		29.3308	-78.5648
25.7134	-76.9301		29.127	-80.3843
25.7615	-77.2096		27.4587	-80.3234
25.7266	-76.8977		28.7566	-76.5178
25.8774	-77.6602		26.5311	-78.7727
25.0966	-76.0535		26.1107	-76.0071
26.1683	-78.1051		28.3424	-80.5393
25.6845	-77.6916		28.356	-80.5296
25.846	-76.9289		27.7269	-79.326
25.7984	-77.4904		28.899	-78.9732
25.9168	-77.5361		26.1434	-78.3534
25.9093	-77.6127		28.4307	-79.5946
25.5777	-77.5343		25.7857	-78.3776
25.4232	-77.4595		26.4274	-78.8367
25.7638	-77.7574		28.5391	-76.1215
25.5253	-77.5405		26.5149	-78.7894
25.5628	-77.5196		29.8763	-77.3596
25.8465	-76.7459		27.3951	-79.966
26.0891	-77.9965		26.4622	-78.7988
25.793	-76.8832		26.39	-78.5471
25.7261	-76.9693		30.4399	-78.9182
25.709	-76.9379		25.9193	-77.8128
25.5253	-77.4935		25.981	-76.3644
25.5274	-77.5862		27.8124	-78.1628
25.5702	-77.1711		28.8574	-74.3246
25.6895	-77.1548		26.9863	-79.3683
25.9385	-77.7932		25.8141	-77.7782
25.7618	-76.9998		25.8167	-77.5339
25.8159	-77.7346		25.9639	-77.7617
25.5225	-77.5818		27.6511	-78.98
25.9332	-77.9784		25.7227	-77.3148
25.9107	-77.841		25.774	-77.375
25.7115	-77.0781		25.7489	-77.1807
25.8813	-77.904		25.9844	-77.8081
26.0507	-77.9329		25.8105	-77.4615
26.0671	-78.0261		25.8286	-77.2869
26.0187	-78.0343		25.7626	-77.2017
25.8578	-77.7555		25.7633	-77.1198
25.9746	-77.9776		25.9032	-77.606
26.0379	-77.9428		26.131	-77.6118
25.8554	-77.8225		25.7982	-77.3542
25.7578	-76.9164		25.9215	-77.5547
25.8343	-77.9112		25.8096	-77.7093
25.9108	-77.888		25.7633	-77.2468
25.9618	-77.9091		25.6823	-77.0358
25.9989	-77.9565		25.9356	-77.7287
25.7171	-77.6169		25.7382	-78.1251
26.2805	-76.991		25.7862	-78.407
25.6929	-77.4917		25.8066	-78.4414
25.7258	-77.0321		25.7855	-78.3774
25.6944	-77.2397		26.3748	-78.3421
26.2907	-75.6941		25.9977	-77.8778
25.9038	-77.6538		26.3714	-78.6059
25.7813	-77.5955		26.0747	-78.5298
25.6678	-77.6258		26.2115	-78.4797
25.8648	-77.7655		26.3143	-78.5779
25.5858	-77.5237		25.8794	-77.0778
25.7177	-76.9077		26.2582	-78.3689
26.0976	-77.9275		26.25	-79.0344
25.9966	-78.0417		25.8326	-76.9811
26.1114	-77.9828		25.6939	-79.4966
25.476	-77.2935		26.4892	-78.8983
25.9331	-77.9973		26.7417	-79.2166
25.9903	-77.0577		26.7442	-75.2508
24.7238	-79.4878		26.3382	-78.7975
25.9757	-78.0744		26.3804	-78.8802
25.942	-77.9774		26.0452	-79.1685
26.1289	-78.1482		26.099	-79.0834
25.4015	-77.3384		26.0708	-79.1624
25.7019	-76.795		26.2344	-78.4141
25.6821	-77.706		26.085	-79.1107
26.0589	-77.0251		26.5242	-78.7691
25.9629	-78.0709		26.4613	-78.8221
25.9158	-77.9469		26.1649	-79.2892
25.9858	-77.9893		26.2649	-78.656
25.9918	-78.1167		26.1035	-79.1073
25.7976	-77.1878		26.0602	-79.3862
25.9808	-77.9454		26.3287	-78.9431
25.7961	-77.7654		25.7571	-78.3656
26.4196	-78.2015		26.3097	-78.5867
27.3346	-76.9335		26.0157	-78.25
25.8046	-77.6653		26.5149	-78.7895
25.9225	-78.0619		26.3604	-75.4331
25.7412	-76.9091		26.5309	-78.7726
25.8779	-76.7835		26.7497	-79.3875
25.7717	-76.7911		24.6635	-76.0184
25.8467	-77.9128		26.5206	-78.7678
25.5104	-77.4738		26.6302	-74.9912
26.3896	-78.6108		25.7993	-77.5255
26.2852	-78.388		25.8062	-78.4763
25.836	-77.5993		26.4326	-73.7123
26.166	-78.1252		25.7393	-78.1981
26.4291	-78.2829		25.4531	-75.9166
25.9951	-78.1172		26.5223	-78.7646
25.8531	-76.6894		26.5208	-78.7619
25.5445	-76.9385		25.8813	-76.7651
26.0614	-78.1401		26.5212	-78.7691
25.6553	-76.5015		25.4552	-76.2094
25.616	-77.6933		25.7868	-78.4489
25.9511	-78.0497		26.6763	-77.0467
25.953	-78.0237		25.141	-77.6372
25.828	-77.3265		26.3979	-76.0842
25.7172	-76.854		25.9836	-77.6442
26.0724	-77.946		25.9607	-75.326
25.7243	-76.9287		25.5072	-77.5493
25.5356	-77.4955		26.3486	-79.3707
25.7447	-77.3043		26.769	-80.0504
25.968	-77.7757		26.529	-79.2726
25.8186	-77.4357		25.7756	-80.1667
25.7562	-77.0785		26.5301	-78.7636
25.721	-77.2506		25.7697	-80.064
25.842	-77.6094		25.7789	-80.1742
25.8578	-77.7299		25.3659	-77.9378
25.4838	-77.4227		26.1275	-77.0011
25.6878	-77.1245		25.9871	-79.8184
25.7319	-76.8643		25.6927	-77.219
25.695	-76.6161		26.2637	-78.3633
25.7104	-77.003		25.8065	-78.4418
25.5478	-77.521		26.0147	-77.0397
25.7616	-77.0725		26.2284	-78.4422
25.7228	-76.9449		27.0666	-79.3003
25.6657	-77.5925		25.937	-76.5554
25.7092	-77.1748		26.0556	-78.13
25.644	-76.9381		25.6943	-77.033
25.91	-77.8689		25.7863	-78.4072
25.9367	-77.8912		26.7067	-79.6933
25.9406	-78.0082		25.7856	-78.3775
25.9026	-77.8748		26.3537	-78.7294
25.839	-77.6182		25.7394	-78.1979
25.7118	-77.2365		25.8021	-78.0447
25.9875	-77.9991		25.8058	-78.4762
25.9641	-76.7749		25.7188	-78.6427
25.7245	-77.0817		25.7385	-78.1248
25.8243	-76.7399		26.0288	-75.5728
25.7509	-77.0593		26.3801	-78.8785
25.9199	-77.8686		25.3925	-79.224
26.0005	-77.9167		25.577	-79.552
25.9362	-77.8421		25.8514	-77.9108
26.0448	-77.906		26.3113	-78.7797
25.8357	-77.6849		27.4089	-79.4211
25.911	-77.8564		25.592	-78.4273
26.0357	-78.0699		26.437	-78.9178
25.8343	-77.701		24.8052	-79.6877
25.8818	-77.8421		25.0807	-77.3407
25.9092	-77.8303		25.7769	-78.3548
25.9714	-78.1103		26.4724	-78.8701
26.0556	-77.929		25.163	-77.5692
26.0329	-77.9934		26.6039	-76.9422
26.1025	-78.0019		25.6018	-77.6732
25.7434	-76.9247		26.382	-78.6214
25.8523	-76.7973		25.8612	-74.0669
26.0461	-77.8544		26.013	-73.6668
25.7831	-77.038		25.4979	-76.6392
25.8076	-76.8592		25.4927	-76.6369
26.0386	-77.9776		26.2935	-78.7515
25.6994	-77.0632		26.5301	-78.7636
25.7204	-76.958		25.3144	-79.53
25.8565	-77.5979		26.5203	-78.7954
25.8822	-76.8347		26.2668	-79.0478
25.7401	-76.9974		26.4264	-78.7804
25.9253	-77.6995		25.7847	-78.2822
25.9294	-77.5646		26.5149	-78.7893
25.8157	-77.4205		26.5228	-78.7713
26.0601	-77.0478		25.7868	-78.449
25.5582	-77.0646		25.7589	-78.3949
25.6462	-77.6453		25.757	-78.3657
26.0846	-77.9804		26.1253	-78.4193
26.3097	-76.9245		25.7706	-78.3081
25.5194	-77.5813		26.4254	-78.874
25.5439	-76.9788		26.5206	-78.7678
25.9079	-77.81		26.5222	-78.7674
25.348	-77.5183		25.6705	-77.1207
26.4786	-76.036		24.9162	-79.6558
25.611	-77.6886		26.5226	-78.7654
25.8507	-76.7214		25.1955	-79.9617
25.9251	-76.4645		27.9751	-77.4699
25.7437	-77.4804		26.0703	-79.1588
26.2063	-78.6403		26.0453	-79.168
24.9845	-77.6516		26.0378	-78.8502
26.4329	-78.7466		25.0781	-77.3256
25.9936	-77.9887		25.317	-77.5259
27.5149	-78.5388		25.8675	-79.2617
25.6119	-77.1974		26.1616	-79.1094
25.7657	-77.4097		25.0259	-79.4814
25.5329	-77.5637		26.5075	-78.7991
25.7084	-77.0769		26.1052	-79.1041
25.8864	-77.651		26.6236	-78.2297
25.2579	-77.693		25.0189	-79.6213
26.0667	-78.3174		26.1683	-78.8813
26.0346	-78.3448		26.521	-78.7623
26.6125	-75.18		26.3801	-78.7474
26.0058	-77.867		26.2958	-78.9504
26.0472	-77.9416		28.0152	-77.345
25.8466	-77.7897		26.1816	-78.6533
26.0432	-78.1041		26.1006	-79.0812
25.9793	-77.9972		26.4292	-74.7132
25.8751	-77.7765		26.3234	-78.1485
25.8315	-77.6901		26.2546	-79.0223
25.8654	-77.9941		26.5208	-78.7619
25.8126	-77.7367		26.5355	-78.7584
26.1244	-78.4457		26.5212	-78.7691
25.7149	-76.9256		26.5202	-78.7608
26.0278	-77.8832		26.5275	-78.766
26.2852	-75.5741		26.0863	-79.11
25.7488	-77.6995		28.2845	-76.516
26.543	-77.065		27.2859	-78.26
26.047	-77.9374		25.7664	-78.6658
25.0928	-77.3459		27.9692	-75.0391
25.9905	-78.4205		26.7011	-75.4196
25.9924	-77.8919		26.588	-76.899
25.6637	-76.7072		26.6392	-76.1868
27.3319	-77.0036		25.793	-76.589
25.8454	-77.8525		25.789	-78.0577
26.2089	-76.9766		26.766	-79.3895
25.8853	-77.6066		28.872	-76.5442
25.788	-77.515		25.0996	-75.7075
25.8425	-77.7503		26.2591	-79.4903
25.736	-77.3266		24.8047	-75.9539
25.7226	-76.9725		26.5438	-77.0634
26.1481	-76.9967		27.2586	-79.6774
25.2487	-77.443		26.2249	-79.3886
25.4233	-77.4765		25.4613	-79.8156
25.9959	-78.413		25.4961	-79.8103
26.1632	-78.4358		25.7748	-78.071
26.2748	-78.1606		25.7935	-80.0826
26.0386	-76.1853		25.2808	-79.9385
25.3377	-79.5744		25.759	-78.1482
25.6971	-76.8258		27.7488	-76.0827
25.1266	-77.6386		26.2443	-77.6504
26.543	-77.065		26.6846	-76.4308
25.5516	-79.4339		25.9897	-77.846
25.2671	-77.4574		25.8204	-78.0028
26.1204	-78.5585		25.8311	-77.6347
25.4171	-77.1074		26.0348	-77.9156
26.9707	-76.8568		26.3528	-78.8479
26.7231	-75.9095		25.937	-77.9333
26.2466	-76.9819		25.7716	-77.1475
25.6962	-77.1797		26.2815	-78.3137
25.4264	-77.4826		26.4623	-78.8877
25.637	-76.0726		26.395	-79.3461
26.4202	-79.4187		26.1011	-79.0843
26.1015	-79.0127		26.4479	-79.0884
26.4528	-78.7716		25.7768	-79.4651
26.3153	-78.7095		25.6803	-77.6673
25.3911	-77.2359		26.5301	-78.7637
25.5271	-75.695		25.761	-77.0463
25.7095	-79.4527		25.937	-77.9313
26.1698	-78.5776		25.7737	-77.789
26.5236	-76.9762		26.3712	-78.2201
26.3934	-78.7183		25.8726	-77.0718
25.37	-77.3531		26.6346	-76.1432
26.3861	-79.3459		25.7386	-78.1246
26.5227	-78.8186		25.9475	-77.8705
26.625	-78.2286		26.2041	-78.427
26.396	-78.6358		25.7001	-77.2318
26.5205	-78.768		25.7853	-78.3778
26.5034	-78.9176		25.7662	-78.4156
26.5227	-78.8084		26.2787	-76.5036
25.9394	-77.9341		25.7702	-76.6769
26.5804	-79.3889		25.6327	-76.3457
26.5167	-78.7962		26.5775	-77.0791
25.9152	-78.0788		25.8784	-77.6128
26.5283	-78.7557		25.7462	-77.1047
27.0453	-79.3433		25.5671	-77.4581
27.0544	-79.2991		25.9594	-77.7908
26.5205	-78.7675		25.9607	-77.8823
26.9185	-79.0048		25.9391	-77.9273
26.5206	-78.7679		25.9056	-77.898
26.5208	-78.7619		25.7692	-78.089
26.4983	-78.7835		25.829	-77.9563
26.5212	-78.769		26.1078	-77.8526
26.5267	-78.7667		25.8428	-77.9391
26.3747	-79.0699		25.9483	-77.8009
26.1745	-75.777		25.752	-77.2615
26.3461	-78.5832		26.0334	-77.8365
25.8759	-78.0178		25.7311	-76.8933
26.864	-79.9578		25.7863	-78.4073
27.0149	-79.3624		25.9208	-76.3295
26.0088	-78.6172		26.5609	-76.6687
26.5994	-79.1436		25.7844	-77.0996
26.1707	-78.9636		25.8075	-77.7603
26.2194	-79.0258		25.699	-77.02
25.7575	-79.4392		25.7394	-77.1077
25.4203	-79.2029		25.8309	-77.3373
29.4076	-79.6843		25.7774	-77.2261
26.4109	-79.9492		25.8718	-77.5239
25.3541	-76.1712		25.7036	-77.3398
25.8298	-77.5386		25.7303	-76.4565
25.912	-79.5284		25.7689	-78.0886
25.8266	-79.4896		25.8205	-76.8424
25.8488	-79.5161		25.7282	-77.1802
27.576	-85.9533		25.4119	-77.9055
27.7154	-86.2421		25.7387	-78.125
26.583	-78.9994		25.957	-77.0942
27.8885	-86.0094		25.764	-77.1188
29.0247	-80.5479		25.5566	-77.4952
28.3577	-80.5345		25.7328	-77.2532
26.5152	-78.7921		25.7714	-77.7277
27.2007	-80.2596		25.9159	-77.8736
27.2126	-80.2567		26.0221	-77.9194
27.4915	-79.5977		25.867	-77.8537
28.409	-80.6092		25.7573	-77.0578
25.4996	-76.6387		25.7479	-77.055
26.4907	-76.0697		26.0649	-77.8778
25.8177	-77.802		25.9381	-77.9907
25.8753	-77.8754		25.9948	-77.8841
25.4124	-77.9094		25.8335	-76.8724
25.9196	-77.9269		25.6999	-76.955
26.9709	-76.5307		25.7312	-76.8567
25.7098	-77.066		26.1053	-78.6102
25.9937	-75.2854		25.9745	-78.0086
25.6727	-76.1154		26.2071	-78.7785
26.2792	-78.3905		25.9437	-77.8122
26.1132	-78.0357		25.7378	-77.0242
26.3356	-76.5412		26.4577	-78.8983
25.4809	-77.5341		25.8202	-78.0027
25.7588	-77.0749		26.2612	-78.3373
25.0795	-75.7606		26.5224	-78.8047
25.9573	-78.1221		26.0019	-76.4438
25.9909	-77.8069		25.8808	-77.4954
25.7782	-77.2565		25.8058	-76.9035
25.7958	-77.2927		25.8247	-77.9361
25.9383	-77.0998		25.8325	-77.8438
26.0774	-77.8133		25.6938	-77.6904
25.8786	-77.6735		25.7364	-76.8766
25.8718	-77.8058		26.0006	-77.8126
25.8508	-76.1698		25.7654	-76.8089
25.6607	-77.5712		25.8642	-77.8096
24.9012	-75.9672		25.9136	-77.8875
25.1502	-75.7191		26.032	-77.8769
26.8963	-76.9688		25.9665	-77.8892
25.3197	-77.4332		25.7914	-77.2637
26.2249	-78.3144		25.8293	-77.7465
25.5285	-77.5291		26.0548	-77.9112
25.7382	-76.9266		25.7495	-77.0684
25.2585	-77.445		25.8624	-77.5902
25.2719	-77.2666		25.8484	-77.8515
26.1394	-76.19		25.7507	-77.1389
25.4925	-77.6153		25.8283	-77.624
25.4828	-77.2211		25.9162	-77.7982
26.625	-78.2286		25.8589	-77.8435
26.2782	-76.4646		25.7591	-76.9951
25.9868	-75.5335		26.3189	-77.6642
25.7815	-77.6759		25.7663	-77.2348
25.8583	-76.8858		25.9512	-77.8757
25.7288	-76.5019		26.0041	-78.0122
26.1241	-78.7821		25.8201	-78.0026
26.5019	-78.773		25.7399	-78.1971
26.4987	-78.8075		26.0585	-77.8977
26.277	-78.2468		26.0099	-78.035
26.1536	-78.681		25.7806	-76.6343
26.2663	-78.3766		25.8554	-77.5584
28.4408	-79.1988		25.9518	-77.8466
25.7745	-77.1072		25.929	-77.6112
27.6616	-78.546		25.7606	-76.7703
26.5237	-78.8111		25.8247	-77.9361
25.7642	-77.5426		25.8423	-76.7226
26.5437	-77.0629		25.6942	-77.6911
26.505	-78.82		25.7222	-76.9703
25.829	-77.9624		25.6063	-77.6147
26.3643	-78.5563		25.9683	-77.7472
26.1837	-78.5852		25.8745	-77.0881
26.2113	-75.7681		25.6872	-77.505
25.4129	-77.4131		25.8032	-77.0418
25.7073	-77.6757		25.7983	-76.8932
25.9017	-77.8024		26.1132	-77.998
25.9817	-78.1533		25.7985	-76.9912
26.4324	-79.0596		25.7061	-77.0587
25.8413	-77.8621		25.676	-77.1137
26.246	-78.6901		25.9286	-77.7843
26.1752	-77.0252		25.5055	-77.5123
26.061	-78.2199		25.8547	-76.8523
26.5239	-78.8197		25.9877	-77.0441
26.3245	-78.5419		25.8189	-78.0059
25.7285	-76.1278		25.8252	-77.9786
26.519	-78.8051		25.9752	-77.9472
25.7487	-79.4929		25.7766	-77.9713
26.2054	-78.9605		26.0811	-78.1176
25.7957	-76.8508		26.2262	-78.2124
24.9919	-77.7849		25.768	-76.7984
26.5205	-78.7675		26.2185	-78.4265
26.5215	-78.7707		25.745	-76.9672
26.5173	-78.7963		25.8741	-76.7931
27.6364	-76.0393		25.9522	-77.9222
26.5437	-77.064		25.8977	-77.7834
26.5301	-78.7635		26.4718	-78.866
26.5204	-78.7611		25.8286	-77.3864
26.5207	-78.7614		25.7968	-78.0422
26.5207	-78.7679		25.8113	-77.4581
26.061	-76.4001		25.7919	-76.854
28.0798	-77.8943		25.7849	-76.8734
25.632	-79.299		25.8305	-77.5342
25.4202	-79.2029		25.8203	-78.0071
25.7429	-77.7746		25.8262	-77.979
26.5609	-79.6968		25.7716	-77.1114
25.5612	-76.7017		25.7401	-78.1971
26.0773	-77.9996		25.7295	-76.9603
26.5208	-78.7619		25.8465	-77.75
26.513	-78.7958		25.8883	-77.6864
26.1477	-79.2961		25.791	-76.9938
25.8994	-79.6469		25.8114	-77.2134
25.5166	-79.5316		25.8515	-78.3589
25.7483	-79.577		26.2082	-78.09
26.6723	-77.2822		25.8067	-78.4393
26.1442	-79.5398		25.7682	-77.4662
26.098	-79.0101		25.9616	-77.8405
26.0574	-79.4004		26.1525	-77.8394
25.0684	-79.618		25.804	-77.2852
26.7699	-80.0533		25.7908	-76.8611
26.521	-78.7698		25.7811	-77.0376
26.4269	-78.9489		25.7388	-77.3739
26.5214	-78.7739		26.1315	-76.901
25.5633	-78.3759		25.9936	-77.9588
25.7513	-79.2868		25.9889	-78.0282
25.6406	-78.4986		26.043	-77.951
25.5536	-79.276		25.6847	-77.4201
25.6342	-76.8021		26.1558	-78.1444
25.9262	-79.7943		25.7794	-77.1515
25.7122	-79.4206		25.8421	-77.3237
25.5426	-76.7467		25.7985	-77.3376
25.42	-79.2027		26.0788	-77.5382
25.5421	-76.7638		26.0249	-77.8628
24.9164	-79.6087		25.7236	-77.0404
25.5006	-76.6648		25.822	-77.2818
26.3685	-74.8177		25.8318	-76.8423
24.8195	-79.5415		25.9152	-77.7802
26.1256	-75.5512		25.8002	-77.3831
25.0257	-77.5516		25.9901	-77.8546
25.7714	-75.477		25.8716	-77.7802
25.4534	-76.9018		25.777	-76.9877
25.0786	-77.3245		25.9653	-77.9418
25.4975	-76.6384		25.6548	-77.5622
25.0819	-77.3674		25.8553	-77.6528
25.0922	-77.3449		25.8209	-78.0071
24.7099	-76.8228		26.0787	-77.5381
25.35	-76.486		25.8828	-77.7543
24.5395	-76.8079		25.8243	-78.2767
24.9845	-77.521		26.0237	-77.9765
24.7261	-77.7835		25.7838	-78.3762
24.988	-77.5248		25.2833	-77.771
26.0077	-78.1474		25.9416	-78.1264
25.0095	-75.6692		25.8855	-78.4077
26.1765	-75.7883		25.723	-76.7408
26.4202	-78.7213		26.1862	-76.9798
28.1684	-76.966		25.9131	-78.0099
28.1683	-80.0569		25.5154	-77.6209
28.3885	-76.3525		25.7541	-78.1795
29.7103	-79.7518		26.0559	-77.93
28.8702	-79.93		25.7244	-76.9432
28.6917	-79.5123		25.8226	-77.5162
29.223	-80.4285		25.9898	-77.7472
26.5237	-78.8025		25.8517	-77.5198
26.8271	-79.5955		25.7019	-77.109
28.2982	-76.2482		25.7392	-77.0205
26.3693	-78.9344		25.7879	-77.7764
26.0667	-79.3795		25.944	-78.4714
26.2585	-78.8965		26.0032	-77.702
26.5148	-78.7906		25.8206	-78.0073
26.7486	-79.9878		25.7828	-77.1026
26.7511	-80.0498		25.7699	-76.992
26.442	-78.8413		26.035	-77.895
26.7153	-80.0486		25.8024	-77.068
26.7487	-80.0487		25.8525	-76.9527
25.7837	-77.6698		26.0071	-77.0216
26.1268	-79.1054		25.7625	-77.133
25.5268	-77.6722		25.7459	-76.9602
25.2006	-79.514		26.1767	-76.179
30.4707	-80.8549		25.9255	-77.9163
26.2407	-79.2094		25.8698	-77.8658
25.8931	-77.6964		25.8379	-77.7836
25.8653	-77.6355		25.8969	-77.6398
25.7536	-76.9734		25.9512	-77.8878
25.742	-77.1022		25.7126	-76.0069
25.801	-77.5666		25.738	-78.1198
25.7515	-77.5659		25.7616	-77.0679
25.9699	-77.7322		25.7224	-77.0581
27.659	-78.7233		25.8395	-78.2902
26.987	-79.447		26.0005	-77.9971
26.4412	-78.7383		25.9068	-77.9032
27.8529	-80.0339		26.0068	-77.8769
26.4536	-78.8081		25.7116	-77.0093
30.4825	-80.8429		25.8042	-77.3752
26.3829	-78.5982		25.7945	-77.4296
25.6828	-76.6787		25.8711	-77.8908
26.5239	-78.7691		25.8633	-77.5278
24.9239	-77.6496		25.7021	-77.072
25.7567	-76.7655		26.2398	-78.5122
26.4208	-79.3425		25.7369	-77.7117
26.4353	-78.8615		25.7964	-77.0992
25.2885	-77.4561		25.7382	-78.1944
26.508	-78.8594		25.7851	-77.7177
26.5243	-78.7689		26.1923	-76.9905
25.1912	-77.3238		25.7466	-77.7214
26.5204	-78.7611		25.7879	-77.0338
26.5276	-78.766		25.8354	-77.639
26.2364	-79.3307		25.8771	-77.724
25.8462	-79.2142		25.9811	-77.7272
26.5207	-78.7679		25.9836	-77.8193
26.5206	-78.7693		25.6837	-76.8836
26.5215	-78.7707		25.8506	-77.7471
26.4609	-78.7734		25.857	-76.8861
26.4572	-78.8332		25.7416	-77.1563
25.4008	-77.4685		26.1114	-78.0852
26.0066	-76.1581		25.9728	-78.0647
26.5224	-78.8084		25.8897	-77.9167
26.2832	-78.9196		26.1459	-76.0223
26.625	-78.2286		26.1701	-76.2378
26.5238	-78.8024		25.7754	-77.3731
26.521	-78.7698		25.9578	-77.9552
24.0012	-75.4844		25.6595	-76.9341
26.5194	-78.8024		25.737	-77.6071
25.9088	-77.9007		25.9715	-77.0883
26.5303	-78.7633		25.971	-77.711
25.6698	-76.6071		26.1423	-77.0456
26.5071	-79.3816		25.9955	-77.7202
25.4857	-78.2162		25.8355	-77.4157
25.7517	-79.287		25.7255	-76.9687
25.5593	-79.1391		25.524	-77.4877
25.7558	-79.2762		25.7152	-76.911
25.6785	-77.6028		25.9103	-77.8437
25.9065	-76.4755		25.7267	-77.0497
25.4064	-77.4908		26.3428	-76.4672
26.4555	-79.111		25.8705	-76.8244
25.4815	-79.5349		25.945	-77.9017
25.3616	-79.5009		25.802	-77.7569
25.7797	-79.7397		25.9929	-77.8263
25.9447	-76.4858		25.7494	-76.9762
28.0104	-77.7051		25.8698	-77.6912
25.4203	-79.2029		25.838	-76.745
25.6754	-79.5716		25.7588	-77.5381
25.078	-77.3256		25.8208	-78.0032
26.5075	-78.7846		25.7575	-78.0927
26.5489	-77.0674		26.0882	-77.9638
25.1447	-75.9993		25.5605	-77.5387
29.2099	-79.5492		25.9827	-78.0031
27.5893	-75.9679		25.5806	-77.4931
26.5431	-77.065		25.771	-78.0624
26.208	-79.0392		25.7179	-77.5692
26.1897	-79.1149		25.7593	-78.3549
28.8406	-76.5422		25.9246	-78.2669
29.7973	-80.5039		26.0785	-77.9492
28.3607	-75.8776		25.8781	-77.5961
25.6069	-76.5059		25.7391	-78.1221
25.4482	-76.8805		25.8789	-77.5349
26.3487	-78.5357		25.8403	-77.3011
26.1612	-79.4032		25.7394	-78.1219
25.5421	-76.7638		25.7579	-78.0914
26.0977	-79.0108		25.8653	-77.7809
26.5147	-78.791		25.8198	-77.7019
26.5178	-78.7955		26.1073	-77.8111
26.2677	-79.1103		26.0526	-77.9319
26.3071	-78.1676		25.7542	-77.2015
25.6681	-77.4199		25.6958	-76.8618
26.2748	-78.2815		25.8402	-77.6766
26.1197	-80.0046		25.756	-77.1286
26.0701	-77.9102		25.8207	-78.0029
26.5225	-78.8163		25.9537	-77.7314
26.1258	-80.0721		25.7705	-78.061
25.9798	-78.1387		25.9486	-77.9964
26.5185	-78.8033		25.9931	-77.941
24.6207	-80.3718		26.0045	-77.9038
24.5538	-80.3478		25.8485	-76.7713
24.6805	-80.354		25.7392	-78.1936
25.9801	-78.1478		91	181
25.7915	-78.8141		25.7767	-77.293
26.6231	-78.2295		25.8466	-76.7919
24.3893	-80.7624		27.2137	-77.1254
25.9278	-78.0569		26.543	-77.065
25.4996	-76.6387		25.874	-76.6381
28.3554	-80.5344		26.1129	-78.0484
28.3269	-80.4682		25.9418	-77.9713
25.2344	-77.2603		25.8224	-76.7605
22.5907	-78.0764		25.7349	-77.0135
23.8069	-79.2003		25.8636	-77.6718
26.5376	-78.7584		25.7625	-76.9095
23.925	-80.9546		25.6819	-77.3354
26.5205	-78.7614		25.7452	-77.3238
26.5302	-78.7559		25.6974	-76.9286
25.0256	-77.5517		25.8597	-77.5294
25.2302	-76.0785		25.8488	-77.4079
24.8781	-75.4663		25.7595	-78.0939
26.0102	-79.4475		25.7031	-77.1466
22.7825	-78.7484		26.0216	-77.0417
25.0806	-77.3388		25.7401	-78.1251
26.6703	-79.246		26.0993	-78.0613
26.346	-78.6116		25.977	-75.7659
22.2645	-77.6251		25.4604	-77.5606
26.6697	-79.4082		26.1797	-76.9972
25.35	-76.486		25.833	-77.6406
31.1098	-80.6095		25.6944	-77.6282
25.1185	-79.6795		25.9934	-77.8458
23.8326	-79.2555		25.7415	-77.0693
24.8333	-77.1036		25.9426	-77.9152
25.2168	-75.8565		25.7487	-77.6698
24.7099	-76.8228		25.7302	-76.8902
26.1622	-79.2329		25.8235	-78.0447
26.1955	-79.1244		26.543	-77.065
24.5258	-80.8073		26.5437	-77.0642
30.406	-81.5462		25.4138	-77.5067
25.8281	-77.9607		26.0958	-78.1925
24.5167	-80.534		26.1704	-78.3282
24.2165	-80.8255		25.9577	-77.9287
25.0844	-77.3519		25.9967	-77.8939
24.2839	-76.6562		25.8723	-77.5646
24.3076	-76.6635		25.8851	-77.7155
24.124	-80.7917		25.915	-77.7053
23.7115	-81.2779		25.7406	-78.1254
23.6778	-81.8732		25.7595	-78.0939
25.8213	-76.9147		26.0967	-78.1079
25.7017	-76.8137		25.9323	-76.3591
25.7304	-77.1747		26.0699	-77.9927
25.9249	-77.9197		25.8261	-77.6494
26.036	-77.8563		26.0269	-77.9319
25.7628	-77.2707		26.3502	-77.9632
25.9122	-77.5297		25.6678	-77.2427
25.9145	-77.821		25.8019	-77.5844
26.1075	-77.0502		25.775	-77.0906
25.8325	-77.6498		25.787	-77.2633
26.2698	-78.1866		25.7318	-77.0297
25.7508	-77.1084		25.7166	-76.9162
25.5304	-77.5018		25.8876	-77.8403
25.5558	-77.0753		25.7293	-76.4502
25.7191	-76.9928		25.8249	-76.9008
25.7279	-77.0875		26.5308	-78.7526
25.557	-77.4453		25.9135	-77.8445
25.5686	-77.518		26.0036	-78.2074
25.5893	-77.6592		25.7155	-77.0072
25.4476	-77.4954		26.3081	-78.697
25.5602	-77.6025		25.9309	-78.0048
25.973	-78.1382		25.9842	-77.9983
25.9211	-77.5817		26.4389	-78.7822
26.3766	-78.3144		24.8752	-79.6759
26.3231	-78.2362		24.9933	-79.5326
25.8032	-75.6806		25.7697	-78.3749
26.0795	-78.1117		25.859	-77.6155
26.0989	-78.0393		26.0437	-77.8783
25.878	-77.8433		25.8436	-77.4609
25.7057	-76.8213		25.8169	-77.5291
26.301	-78.654		25.7696	-78.3749
26.454	-78.9421		25.8103	-78.4375
25.9693	-78.0667		25.5494	-77.5869
25.9455	-78.0015		26.4778	-76.5449
25.9617	-77.8756		25.7843	-78.396
25.8793	-77.7288		25.7592	-78.0928
26.1177	-77.9223		26.2126	-77.0173
26.5242	-78.769		27.8058	-77.4285
26.0719	-78.0499		25.6703	-79.5835
25.9856	-77.9945		26.0455	-77.988
25.8516	-77.7424		25.2206	-79.5858
26.4898	-78.8528		25.9901	-77.9512
26.5094	-78.8299		26.285	-78.4971
25.8709	-77.8536		26.3797	-78.8238
25.8872	-78.0513		25.79	-77.1161
25.6812	-77.0723		26.1524	-77.868
25.9318	-77.8798		25.9915	-76.9162
25.7408	-76.9998		25.9418	-77.8098
26.4589	-78.9266		25.7618	-77.3263
26.4746	-78.8939		25.8741	-77.7409
25.7213	-76.8566		25.7619	-77.1614
26.2553	-78.8901		25.137	-77.6847
25.7419	-76.8654		25.7095	-77.0541
26.3969	-78.9477		26.0446	-78.7145
25.7053	-76.9087		26.2239	-78.0318
25.8933	-77.7425		25.7724	-78.062
26.016	-77.9427		26.1503	-76.1499
25.6923	-77.0379		91	181
25.8174	-76.8458		26.2867	-78.8259
25.7058	-76.9362		27.5731	-75.7306
25.7067	-77.0071		26.3888	-78.7537
25.9868	-77.9539		25.7411	-78.1241
25.6962	-76.9795		25.9427	-76.644
25.7613	-77.2733		26.2458	-75.9789
25.7599	-77.333		26.0749	-77.9199
25.7799	-77.4381		25.9496	-77.9042
26.2014	-77.8049		25.7212	-76.9749
25.8015	-77.4398		26.4429	-78.8864
25.7024	-77.2851		26.1419	-76.9966
25.8378	-77.5504		25.8143	-77.322
25.8788	-77.6055		25.7409	-77.3938
25.5265	-77.5138		25.8157	-77.1906
25.7928	-77.0498		26.0786	-77.5384
25.476	-77.4788		25.7264	-76.9006
25.905	-77.9645		26.1215	-78.1336
25.6968	-76.9015		26.3855	-78.7395
25.6865	-77.6195		25.6054	-76.0913
26.0823	-77.9932		26.2256	-78.4463
26.0741	-77.8455		25.8771	-77.0867
25.9764	-77.9399		26.399	-78.7697
25.9278	-77.8489		25.7585	-76.8308
25.8936	-77.8545		25.7844	-78.3963
26.0072	-78.1495		25.8826	-78.0627
25.7026	-76.9171		25.9362	-78.4639
25.9569	-77.9751		26.2681	-78.0903
25.9629	-78.0073		25.6738	-76.6298
25.5038	-75.811		26.2011	-78.2619
25.859	-76.9058		25.4996	-76.6387
25.4858	-77.3263		25.0968	-75.7656
25.7056	-76.6918		25.6353	-77.1363
25.4579	-77.3709		25.7698	-78.3755
26.3307	-78.7167		26.0678	-76.9991
25.6264	-77.5452		25.5886	-75.9477
25.7531	-76.8768		25.739	-78.1902
27.2511	-77.9273		25.8358	-77.5057
26.2358	-76.797		26.1042	-76.1461
26.0135	-78.0666		24.8327	-75.9243
26.4116	-78.7527		25.7409	-78.1244
25.9407	-77.9509		26.1546	-76.0272
25.8316	-77.7607		25.8105	-77.7228
25.5928	-77.4753		25.8448	-77.7578
26.4043	-78.9675		25.8038	-77.7658
25.7562	-77.873		25.8032	-77.3892
25.9957	-77.9034		25.4161	-76.1908
26.3792	-78.3795		25.8293	-77.7742
26.5239	-78.7687		25.7802	-76.9813
25.9382	-77.842		26.1357	-77.7293
27.8543	-77.9651		25.7455	-77.2351
25.7864	-76.8579		26.1202	-77.6915
25.9006	-77.8174		26.0177	-77.7364
26.1767	-78.5839		25.9673	-77.9403
25.5882	-77.6505		25.818	-77.094
26.253	-78.9648		25.9286	-77.8494
26.5304	-78.7634		25.783	-76.9711
25.7785	-77.9558		26.0464	-77.8423
25.5484	-77.5093		25.767	-77.4022
25.7032	-77.0491		26.0408	-77.8295
26.5231	-78.7729		25.8985	-77.6703
25.9852	-75.9211		26.1006	-77.5532
25.8302	-77.6072		25.6699	-77.2986
25.9392	-77.7234		25.7144	-77.701
26.04	-75.1952		25.648	-77.6513
26.0097	-77.9693		26.1209	-77.5679
25.71	-77.0573		25.8003	-78.0799
25.7114	-76.9936		25.7403	-78.1249
25.5958	-77.5549		25.735	-76.865
26.1841	-79.1928		25.3859	-77.5354
25.7336	-77.2256		26.2641	-76.959
25.8368	-77.5737		25.797	-76.468
25.5543	-77.4455		25.9112	-76.6491
25.585	-77.516		25.7838	-78.3972
25.4269	-77.4292		25.7434	-76.896
25.4661	-77.468		25.618	-77.3172
25.9494	-77.8986		26.5507	-76.1721
26.1515	-79.4667		25.9839	-77.0303
26.3076	-79.0511		25.9762	-77.7097
25.6754	-77.6192		25.6829	-77.1048
26.265	-79.1137		26.0896	-78.0761
25.8155	-76.5027		26.3553	-78.9243
25.4734	-77.517		25.9873	-77.8031
26.0347	-77.9309		25.7286	-76.8491
26.0784	-79.3397		26.1768	-77.9241
25.7196	-77.6392		25.9697	-76.6586
25.7296	-76.4818		25.7734	-77.0815
26.1029	-79.2368		25.8669	-77.8169
26.4135	-78.929		25.7817	-76.7981
26.2153	-79.0422		25.8401	-77.8168
26.1025	-79.0093		25.9055	-77.8933
26.5217	-78.766		25.959	-77.9685
25.9792	-77.9422		25.8097	-76.9292
26.4997	-78.9923		25.9906	-77.9994
25.8857	-79.5869		25.9095	-77.8849
25.8	-77.6683		25.5245	-77.5013
25.9409	-77.8735		26.1846	-76.8261
26.433	-78.943		25.7844	-76.8724
26.0541	-78.0691		25.9242	-77.9214
26.2332	-75.9931		25.7236	-76.9378
26.4984	-78.7732		25.7201	-77.5279
26.5273	-78.766		25.777	-76.8648
26.5181	-78.7905		25.8945	-77.7481
26.4264	-78.4874		26.1009	-77.5555
25.7216	-76.8754		26.101	-77.5532
26.3493	-78.9713		26.0785	-77.5384
25.9447	-77.9521		25.7568	-76.9258
25.6839	-77.6818		25.7395	-78.1261
25.937	-77.9325		25.8981	-78.078
26.5118	-78.8079		25.5768	-76.0212
26.0805	-79.3884		25.6393	-76.2209
25.7887	-77.1568		26.2839	-76.9309
26.111	-78.1753		25.9574	-76.2323
26.4126	-78.857		25.9546	-77.9587
26.5303	-78.758		25.8788	-77.8336
26.0006	-78.0341		25.8165	-77.7537
25.9717	-77.9988		25.9849	-78.2568
25.9101	-77.8445		25.7686	-78.3779
25.8022	-77.7367		25.8398	-77.6332
25.7167	-76.7041		25.8084	-77.1292
25.9059	-77.8443		26.0097	-77.872
25.8426	-77.642		25.85	-77.8121
25.9389	-77.9387		25.8279	-76.9009
25.8024	-77.8213		25.7332	-77.4202
25.6724	-76.9012		25.7914	-78.0533
25.8775	-77.8779		26.543	-77.065
26.1193	-77.9051		25.8793	-76.8101
25.9203	-77.853		26.0737	-77.9216
25.7978	-76.8479		25.7784	-77.0886
25.852	-77.7513		25.9572	-77.9936
25.8393	-77.7231		26.0454	-78.031
25.7513	-76.9009		26.0769	-76.3635
25.7511	-76.7799		25.6922	-76.8089
25.7534	-77.1197		25.8495	-77.8916
25.3168	-75.2818		25.8399	-77.7398
25.7375	-76.9741		26.0149	-77.0534
25.8396	-77.7093		25.8051	-77.4875
25.8159	-76.8114		25.7733	-76.9774
25.7801	-76.9457		25.9765	-77.74
25.9046	-77.5043		25.4966	-77.5732
25.825	-77.4441		25.9229	-78.026
25.7329	-77.2348		25.4872	-77.586
26.1402	-77.8576		25.7395	-78.1263
26.0132	-77.9863		25.7824	-77.2066
26.0716	-77.8255		25.6412	-77.4992
25.6952	-77.2969		26.0626	-77.0269
25.5517	-77.5223		25.7476	-76.9772
25.7859	-77.7149		26.0771	-78.012
26.0334	-77.055		26.0733	-76.2986
25.574	-77.6121		26.0478	-77.9014
25.9473	-77.9904		25.7293	-76.8946
25.563	-77.601		26.0584	-77.955
25.7607	-76.9327		26.0178	-78.0155
25.9486	-77.981		25.7241	-77.0441
26.0703	-77.7695		26.0796	-76.6793
25.9839	-78.061		25.8555	-76.8918
26.1022	-77.979		25.9606	-76.1682
26.0582	-77.0257		25.8724	-76.8163
26.0318	-77.8602		25.9257	-78.1539
25.7159	-77.0763		25.7746	-76.6712
25.9368	-77.9428		25.7318	-76.9081
25.8403	-77.1238		26.1946	-76.0093
25.4744	-77.4664		25.7832	-78.4007
25.7069	-77.7459		25.5238	-77.5615
25.6198	-77.3287		25.857	-76.8881
25.993	-78.1041		25.8232	-76.8952
26.0634	-77.8936		25.8056	-77.4753
26.0009	-77.9271		25.7177	-77.0142
[truncated: 4,451 more rows]

## Sheet: Figure 3
Mean ship speed pre-COVID-19		Mean ship speed during-COVID-19
14.5638		13.5371
12.9771		10.7643
19.0796		12.6582
10.4346		12.324
10.9853		11.7573
10.1125		10.9134
14.8871		10.65
16.0389		10.8121
12.8295		10.7058
16.6827		12.4235
17.3784		11.4912
15.9919		12.8373
14.0069		8.14332
13.736		11.1448
9.7		8.16567
14.3567		11.9122
12.5633		11.6224
16.1625		10.1214
13.2724		12.229
12.8439		9.8625
12.0374		8.18737
12.9086		11.3446
12.7237		10.55
12.4065		10.9229
12.5488		8.22188
13.4875		12.1727
14.0108		13.2375
13.4826		11.1714
10.1333		10.8184
9.7		8.154
12.1397		11.7856
12.341		9.25843
10.6844		8.35488
11.2541		9.16973
11.0945		10.5135
12.7214		13.4789
12.6686		10.2125
11.5956		7.83235
11.197		10.34
11.7892		10.2923
11.7229		8.90811
12.496		11.0631
11.8342		8.93243
11.1143		12.4857
11.794		4.55
12.2106		11.783
12.5262		8.41787
12.9117		10.7538
12.2787		21.2
14.6956		9.41111
13.7557		11.0435
13.7328		10.5857
14.3185		9.964
13.0961		6.33333
12.2704		10.4456
13.3		9.16512
11.9013		9.28333
11.6495		9.8125
11.6586		8.87632
11.3		11.7235
12.9388		8.82439
13.4139		7.45509
13.2682		9.96319
13.8425		11.2957
13.496		6.80714
12.725		5.55
13.1133		8.38
12.8465		4.71667
12.9314		12.759
12.4367		11.6049
10.45		8.07714
11.8731		10.3083
16.675		10.5531
10.7098		12.8934
12.4088		10.1404
14.658		4.6
13.4335		10.7157
12.7		10.2273
18.1204		8.54706
17.9951		7.58409
12.0673		11.7237
10.15		9.32549
13.6215		13.88
14.2103		9.53582
15.0276		12.755
12.15		12.85
10.4		12.2877
13.8783		8.94531
13.8714		11.9944
14.4723		12.65
18.0962		12.23
18.3		13
17.7532		11.8127
14.1748		11.4738
15.1829		12.8463
16.5021		13.0366
13.0554		13.5764
13.7097		14.0954
13.0299		14.9133
13.0179		13.2263
15.3504		13.7844
11.5953		13.742
14.1928		12.8231
13.5099		12.6417
14.6112		14.4496
14.8218		13.1762
14.3412		13.4791
14.1421		13.1678
12.576		13.0427
14.3		12.7068
14.0639		9.52283
13.4699		12.6798
13.8889		12.0273
13.4101		11.7835
13.483		11.6202
13.8586		13.6295
13.2779		10.7907
12.2615		12.361
13.0222		11.6622
12.376		13.2593
11.7289		13.082
11.9844		13.132
13.6456		13.4972
11.9232		14.1769
11.8141		14.4167
13.4947		12.7689
12.5973		13.4051
11.3237		12.525
12.4366		12.5201
12.2909		13.9644
10.5919		11.829
13.1553		12.5916
13.025		13.1304
12.9529		10.9667
12.0719		11.441
11.2888		13.8396
12.5755		12.6948
13.3102		13.9265
11.508		12.584
6.56815		12.9306
12.9409		13.4996
0.6		14.2333
0.1		11.9187
13.1497		14.1688
14.1239		13.1718
13.0983		13.4938
16.0713		13.0923
12.8612		14.4738
13.7301		11.1506
13.7765		13.6521
13.7109		14.1236
12.2659		11.5208
13.3167		11.9977
12.1234		12.8308
13.2915		12.5589
12.2301		12.6562
12.2743		12.6892
11.1651		12.994
12.4369		12.0045
13.9091		10.5455
12.7667		13.0064
12.998		16.3548
13.0106		12.9363
13.5274		13.1171
13.0682		14.5797
14.3069		12.1378
12.8385		11.5109
12.8263		9
12.2877		12.7266
7.95		11.4476
12.4043		12.5086
10.2884		13.9757
15.4908		11.4978
13.4585		12.2452
14.7078		12.2712
14.0281		13.6245
14.0619		12.1176
14.426		12.1519
14.7925		11.4137
13.5714		12.474
13.9635		14.1225
14.4864		12.3401
15.35		12.6186
13.0015		13.5296
13.4364		11.5294
12.9543		7.45037
12.6743		13.5125
12.3673		14.459
12.5978		13.5826
11.8		14.1465
12.8474		13.7828
14.0923		11.2185
13.7861		7.74985
13.8914		9.43308
13.3856		10.4179
14.5709		7.81478
13.2476		7.74773
14.3432		8.88843
15.368		7.86774
15.1437		8.7625
15.5881		11.674
12.9812		11.9254
13.1513		10.7947
14.5388		12.2132
12.8456		14.1008
13.7606		11.8782
12.8206		12.8909
12.0492		11.3818
15.291		10.1375
14.0214		12
13.7848		13.5421
16.7829		13.6087
14.5927		13.2708
14.3018		11.0423
12.7944		10.5
14.0263		15.234
17.2333		13.741
13.8551		12.4179
13.2604		10.7216
13.6003		14.6111
13.3413		11.1
15.4536		12.16
13.4225		10.4077
13.5335		11.1474
14.56		7.90984
14.6961		12.5
12.9948		13.5633
13.5198		13.5216
13.1214		13.5389
13.558		6.88364
13.1634		13.3073
14.6574		12.3947
13.4725		12.6535
13.6637		13.9836
14.0064		11.9883
14.45		13.1855
13.6119		13.5574
14.508		13.4854
12.8455		13.0535
13.9992		13.2401
13.8395		11.9396
13.0473		11.4319
11.5156		11.5274
12.8694		13.1594
12.2193		12.9926
14.9506		13.7315
14.1314		16.1456
14.0353		13.6695
13.99		9.5875
13.6741		12.3839
12.4404		13.6008
10.5144		9.71068
11.9849		12.4816
11.2916		13.6334
12.8454		17.4
20.5213		14.5882
12.3828		12.2086
14.6296		13.9788
18.4026		13.1641
17.4534		14.5209
15.6102		10.5619
15.9168		13.2128
15.8612		12.6335
12.4736		12.7913
14.4105		12.6199
13.2173		13.4565
13.3125		13.4782
14.1549		12.5484
12.8254		10.0957
11.4805		9.05
12.7377		14.2727
7.1		11.1386
12.8361		12.1987
11.0429		13.4366
10.5947		14.6716
12.0295		14.576
12.5433		13.4679
9.55		12.5145
13.5388		13.9673
12.9958		12.555
13.6458		14.0252
13.5586		12.7284
14.2751		12.88
12.4228		11.2596
12.3128		12.1696
10.6687		10.5058
11.4203		10.459
10.4103		10.4761
8.76611		9.87417
10.1519		13.7701
10.481		11.8851
10.3824		12.6459
12.3961		12.3718
14.3551		10.5992
13.3802		14.008
14.1126		13.8275
14.3661		14.6163
13.1041		15.2
13.8096		15.0597
15.3427		13.1835
15.2721		12.7367
14.0962		11.665
13.5182		14.4714
15.5986		13.0217
16.6		12.1967
12.803		13.4144
12.5643		13.2078
12.4311		13.495
12.1679		14.7503
12.5768		15.1097
14.0797		11.3058
14.5		11.9711
14.0625		13.2549
13.804		13.3189
12.3809		15.1
12.7568		11.9973
12.9149		12.119
12.2368		12.5072
11.5485		13.1291
12.8421		13.0444
12.9943		12.1119
12.7512		12.0341
11.7		11.8839
13.2442		13.1539
13.3438		11.9683
12.9675		12.828
12.9967		8.59469
12.5153		11.3
12.6815		13.1741
13.1671		16.4
10.4065		14.8826
12.1844		13.758
12.5324		14.6604
9.72783		13.0702
12.2725		10.2914
8.91164		10.5339
8.1878		7.22567
7.1666		11.8902
11.4228		12.633
13.4803		13.1861
12.8488		15.6285
13.1458		15.2781
12.7844		15.785
12.4774		14.4673
12.6442		11.5076
13.3448		11.4975
13.1025		11.4945
12.8493		12.7681
13.7661		13.2809
13.0703		10.9556
10.5729		13.3907
11.3528		12.4657
11.7605		12.3481
14.0596		12.4491
12.4185		12.5131
14.9469		12.4547
14.8581		10.9396
15.2968		12.8649
16.1783		13.2444
16.4308		12.9371
17.2984		13.5088
17.3369		13.7628
15.0859		13.3357
14.9587		11.5635
14.6162		15.8026
13.6471		15.4141
12.2721		12.7378
12.0353		16.3
11.8572		15.4942
11.5662		15.976
11.7232		15.2654
12.6521		13.4889
14.0746		13.2381
11.1992		15.1067
11.9996		15.2308
11.533		10.7875
6.64902		12.719
13.8106		13.2988
13.5467		14.0926
13.5154		12.1667
13.0241		12.8429
13.521		8.37873
14.6689		10.9
15.3163		11.2312
15.6162		10.7505
15.5409		11.0065
13.848		10.3781
13.5816		9.01718
12.3097		13.1367
7.95637		12.5903
11.307		12.9625
12.092		14.8044
14.8535		15.7568
13.9504		12.3632
14.5335		12.6994
15.6783		14.1316
15.0688		10.1615
13.8041		14.1667
12.2072		11.4573
11.6371		14.0708
12.2709		11.0244
12.2209		10.4059
12.965		10.1629
14.04		9.19478
16.0333		10.0833
14.8804		10.75
15.6204		11.15
14.5922		6.98292
14.1627		6.95064
15.1572		7.55556
14.5954		10.9
15.181		8.65097
14.1755		7.34925
14.9882		10.0465
14.6583		12.1429
16.6148		10.7827
14.8503		10.69
14.1882		10.9179
14.419		9.70118
13.7273		9.87627
13.7793		9.1735
13.8398		11.1145
13.6297		9.58589
14.7449		8.13818
15.4612		8.81379
15.3963		9.89349
15.3317		10.1203
15.24		12.0556
15.311		8.04904
15.8607		6.86348
14.5504		10.6389
13.9529		13.2732
13.5605		11.2544
14.2682		12.673
11.9454		10.5156
12.9167		9.79336
14.833		8.40373
14.5308		10.0673
13.449		12.0498
13.0709		4.725
14.6136		12.1032
14.178		12.9758
14.7513		12.2628
12.1298		7.97225
13.431		6.2545
12.1366		6.75411
12.721		10.9446
11.1264		7.19692
10.2481		7.00702
12.7845		7.11063
14.2224		7.94565
10.1		14
13.4797		12.5575
13.751		10.447
15.2611		9.44746
14.2153		0.2
15.8237		8.84057
13.9135		5.26781
13.6539		5.15564
13.9663		5.69639
12.9839		6.37626
14.8358		5.77598
15.0528		8.2
14.643		2.10526
15.1304		6.56833
15.2977		0.433333
15.4393		7.09167
15.3766		6.68188
14.0907		11.3
17.0944		7.85
14.8667		6.77465
15.592		6.94688
12.4429		6.83797
13.446		7.75625
13.09		0.075
12.1605		4.49245
12.7866		8.175
14.7976		6.08387
14.9732		9.98019
14.6481		5.23333
13.9277		5.20625
15.4002		7.325
14.1089		6.96667
14.3997		11.5061
16.5062		12.8423
15.0867		11.6429
15.0255		9.36691
15.9383		12.1292
14.0147		8.92885
13.6958		6.68493
14.6925		6.75
13.0227		6.91379
12.9832		7.50345
13.1324		8.87143
11.9975		13.7214
12.3711		5.9557
13.8845		18.35
13.1734		10.9904
14.2954		15.0353
13.9188		16.1083
13.6482		18.2
13.1614		15.26
12.5298		15.8857
12.835		12.6158
12.6923		18.15
13.4399		12.01
13.9799		11.1
9.6		9.78212
13.985		11.4
14.2871		9.38329
15.0299		0.1
15.1347		8.93333
14.7392		5.65
14.7674		11.9503
12.6991		7.26077
14.5224		12.5998
13.8655		11.2165
14.8577		6.53937
13.0887		12.6626
12.4144		9.47938
13.728		5.57895
13.9716		9.87496
14.2127		8.12103
13.7898		10.5507
13.2112		11.0802
13.5677		8.14142
13.9769		9.92375
13.4095		11.373
13.9568		12.6255
12.1595		12.6244
11.5933		13.0375
11.1807		7.41838
15.944		6.65588
16.6467		12.5978
14.7899		5.28158
12.9961		12.5952
12.8515		6.97687
12.9948		3.1
12.9592		9.97861
12.8757		10.1684
12.8052		6.89583
13.6666		10.8785
14.3786		12.6039
14.5441		4.85
14.4971		12.9058
15.3655		9.24587
14.1977		12.0345
9.6		7.24111
13.9679		9.25531
13.5593		2.78462
14.6411		9.3
14.8138		11.5
14.0248		7.52774
12.3021		13.1322
12.7994		4.17895
13.5224		11.7934
14.66		9.66315
13.3501		6.67197
16.4215		10.5875
13.6339		7.39348
14.1059		12.3094
13.668		11.1696
13.1922		12.386
13.0351		11.4482
12.8983		6.83797
12.4554		10.275
14.155		11.9
14.0713		10.1635
12.8874		5.752
13.6532		9.97137
13.0965		5.43875
14.2396		8.31818
13.1899		8.83
15.9458		13.2146
13.976		6.97
15.4667		5.4
16.777		6.76
17.2484		7.03333
17.6166		10.6129
16.7003		13.7782
17.4625		11.3555
14.0806		11.3916
13.9947		11.3027
13.04		7.17143
14.7969		14.5
14.1488		10.8469
13.928		11.9323
14.0778		9.9
16.3947		9.22021
12.6901		11.6844
11.7481		11.6579
15.5474		11.25
16.7747		10.0714
18.4291		11.9971
16.148		7
13.8424		10.8858
14.2357		7.98
15.4599		6.83636
15.9704		12.5667
15.9509		0.6
16.6898		7.3625
15.1096		13.4089
15.184		0.2
15.0815		11.2338
16.0123		11.2462
14.4295		10.2607
17.2087		0.3
16.7699		13.0103
16.6279		10.6029
16.5184		11.219
15.8556		10.1417
16.9305		13.4
13.8034		11.9612
13.9683		12.5375
14.0042		12.95
14.0956		9.81788
13.9816		13.2582
14.1854		11.08
13.0518		12.004
14.9494		13.3672
14.7207		11.3069
12.3002		12.1625
12.2163		13
12.3863		14.0222
12.1133		12.9
11.7561		12.0136
12.683		12.9183
12.1983		10.6
12.5892		9.98283
12.9497		10.3459
13.3		12.956
13.8847		10.3052
11		7.9
13.8896		11.9783
14.5007		10.1618
14.0924		13.3523
13.075		13.2918
13.9329		12.3409
11.3866		13.7969
13.1368		13.4161
15.1492		13.7198
15.2902		10.6549
13.5252		12.727
14.9		12.7831
13.3457		13.4654
11.2		12.859
14.0617		11.8278
12.6732		11.9043
12.7097		10.4281
13.0417		10.3476
13.38		10.3782
13.1		11.0154
11.4843		10.028
19.2		9.96302
13.5786		13.1109
12.7089		11.6953
13.6074		12.6
12.5075		14.8499
11.9058		12.3776
9.58315		12.4
12.2114		11.8322
13.35		12.2754
11.66		12.7725
20.6		12.4014
14.199		12.3377
13.876		13.8226
13.3184		13.167
13.1708		13.3012
13.1269		12.9349
12.9902		12.9773
9.66667		12.685
10.2935		14.3118
14.6055		14.1531
15.45		12.9217
12.2667		11.3078
12.8287		14.046
11.2		11.6423
14.6		13.112
12.885		12.9592
13.8868		10.9471
14.4957		9.73596
13.8667		11.823
12.2559		8.83289
13.2929		9.31753
14.5357		10.8344
13.0778		8.73803
14		11.7131
8.8		9.9901
15.5		10.8565
9.87571		9.85512
12.1492		12.9588
16.6		11.0849
15.588		11.8717
12.5444		11.3951
12.0421		11.3054
13.4726		9.73525
12.4064		10.1687
16		9.476
10.3816		10.4254
7.8		11.6488
14.04		12.4384
11.9587		13.0604
12.8772		13.6199
12.5		13.8579
12.8067		13.8663
13.5264		13.9469
13.2635		13.8392
9.30129		14.0563
12.5934		13.2658
14.6364		12.4253
14.3943		11.4161
13.3756		10.6838
11.1367		9.89603
9.51135		11.1131
10.8265		10.6923
15.1045		10.0489
10.8603		12.0307
16.7		12
14.2714		11.8055
11.5271		11.6321
13.5		12.0595
9.77296		12.5083
9.82896		12.7196
17.0667		12.6615
11.4034		14.2813
15.275		14.1443
12.7353		13.7421
10.6877		16.9652
9.86667		11.308
11.9		13.7676
10.5376		11.2
9.95		12.9338
13.45		13.0454
9.25363		13.0099
9.90444		13.6188
13.226		11.8833
7.49412		12.3985
14.3463		13.6256
11.577		11.6841
11.0556		12.1148
11.7		13.6842
8.175		12.5321
11.5311		12.7677
13.9232		13.6598
9.13042		12.6648
11.6667		12.7765
9.42847		12.2165
17.3		14.0742
9.93947		12.0609
10.4208		10.8147
10.1082		13.255
11.3565		13.535
12.5349		12.0312
4.95		10.2733
11.16		10.0111
12.4		11.2621
10.2818		9.76667
8.08214		14.8867
13.6381		10.5907
10.064		15.5015
11.62		14.6375
17.6		14.6418
13.9531		14.6469
15.5816		14.1366
15.1		13.1421
15.8		13.9083
15.1896		13.8022
14.195		15.416
9.2		12.8416
14.45		13.1989
14.0941		13.1017
14.2		13.5887
9.8		15.7798
16.7323		14.6198
14.5571		13.1
13.7446		15.4295
16.5414		13.4777
15.95		16.5073
21.3		12.4049
14.8637		13
15.2663		12.5346
11.1719		12.4369
9.36667		12.6169
12.9844		9.91141
6.45		8.7301
14.4		14.3773
16.0835		13.5683
16.2845		12.1753
15.8805		10.2649
14.0822		13.5915
15.9548		13.811
13.8819		14.4023
15.2812		15.6353
15.6526		13.8532
15.1424		20.8
14.4063		12.5783
14.7628		13.4124
16.55		13.2475
13.0977		12.5473
15.4586		13.1721
15.6377		13.5109
18.432		12.8425
17.0756		11.0836
15.4261		12.4805
14.125		13.3414
12.3075		15.2284
15.8335		12.0799
14.4946		11.791
14.3795		12.0118
14.9771		12.2839
14.8071		11.057
15.3724		12.5853
14.7232		12.7439
13.7454		12.707
14.3567		13.2481
13.9177		10.2053
10.9364		10.261
15.1246		9.2877
13.6202		10.4233
15.1448		9.41295
15.3234		12.03
14.2883		14.4
17.0735		11.3732
12.5937		9.1429
15.0663		9.93333
13.4463		3.5
12.0009		6.45276
14.534		10.2483
12.1374		7.02689
10.8563		12.1585
10		11.5188
11.7219		14.0542
17.3656		14.3699
13.1407		14.0476
12.3745		13.102
14.2079		13.9775
14.0986		11.2443
12.5098		14.1559
17.0536		15.2798
14.6424		13.0823
13.5457		11.4045
16.7814		8.88125
23.2		9.25202
15.4401		8.75937
14.5937		12.0963
13.938		8.92753
16.5038		8.83529
16.2986		11.5318
17.291		11.9474
17.3258		11.3819
17.0778		11.2159
16.9762		12.058
16.6869		11.2469
20.5		11.4163
12.6368		12.2553
14.9		11.8508
15.9548		12.8775
14.5641		12.5694
16.5113		10.8879
16.2907		13.1031
17.7609		12.4357
15.0963		11.2839
14.2694		11.9532
16.1466		11.3715
15.0636		11.867
14.9169		12.5612
13.7461		13.8397
16.798		14.026
15.9714		14.0054
11.6326		13.5868
13.2		14.2446
16.0129		11.6799
14.3151		11.7887
16.5625		11.8642
13.355		8.8
14.275		11.4223
14.2904		11.05
13.8355		11.1473
14.6285		12.3795
13.7014		9.44889
13.4469		12.9453
13.3906		13.4104
14.939		13.3732
14.0516		12.5054
13.8709		11.7772
12.5346		13.5119
13.7235		11.3846
11.452		14.5124
12.4657		13.7647
12.0593		14.8794
13.5765		14.8672
12.377		15.3006
10.2233		15.3215
11.9631		13.1638
9.56202		13.7164
8.1		14.3539
13.6704		17.7
14.2332		12.5877
12.204		10.9943
12.2078		12.1
14.4975		6.6877
12.9583		11.2137
12.7381		8.12498
13.2737		9.17474
13.469		9.975
12.8633		8.84865
12.7381		8.48167
12.5169		10.8238
12.0139		9.16825
12.7988		9.54419
10.1042		9.16788
7.67042		9.07734
11.2184		9.56667
12.5541		8.78208
14.4302		8.92863
10.7333		16.8628
13.7063		11.6894
16.3		10.9339
13.9416		11.4914
14.3694		7.36308
14.4076		8.40657
11.1		9.28354
11.6644		9.9628
12.7362		13.3934
13.2092		13.4527
11.3806		14.017
13.4083		14.1651
12.5644		14.6117
14.0728		15.0823
11.3379		14.9692
10.7737		13.5241
11.3872		14.868
13.9539		12.2139
15.2034		12.0079
13.5938		12.1037
13.7963		14.7352
14.1251		12.9629
14.5102		12.4235
15.4822		9.86051
15.4008		13.8542
15.5294		12.9047
14.2231		13.8764
13.2314		11.0898
13.0569		13.3345
13.3444		11.892
13.74		11.5404
14.702		9.57696
13.1478		9.99065
14.3211		8.7
13.7018		12.4824
14.336		11.6594
14.0448		12.8297
14.594		12.6408
14.3593		14.3343
14.5536		14.7776
13.3575		14.6117
15.8241		11.4933
15.2265		13.3321
16.7439		12.9103
17.1011		13.5648
16.6907		13.4337
17.3354		12.8744
16.4729		13.112
13.9912		12.495
16.1064		14.3802
12.068		15.9906
14.6212		13.8017
14.4477		14.0064
15.0763		12.8379
16.0009		14.3536
16.5055		12.6109
16.7555		12.7699
17.2259		11.5134
16.3517		11.6171
17.3306		11.2684
16.8233		11.6832
17.0796		11.2027
14.2491		10.9216
13.5128		11.0178
12.1818		9.46413
12.8356		9.49905
12.9049		11.4048
14.0387		13.2009
15.5927		13.1011
15.2708		13.0138
15.1745		13.7367
16.4506		13.722
14.8846		12.244
16.3369		10.4134
14.8229		11.8431
16.7665		11.3428
14.2649		8.49151
16.3334		6.4
16.1032		9.50637
16.5451		7.31717
14.0235		12.95
14.8929		11.0443
15.328		6.66471
14.8477		9.56696
12.4		11.7677
15.2512		2.92
13.4958		9.50386
13.1218		8.73333
13.1918		13.3533
14.0484		4.49565
16.2517		4.59655
14.6915		7.3
14.9021		10.5556
15.4605		10.5231
15.1182		8.23333
16.4251		10.15
16.682		10.1483
16.259		15.75
14.3847		15.9
13.8099		13.34
13.0558		9.74361
12.776		14.4191
13.4692		13.5456
13.7838		11.6
13.5984		10.612
13.8483		13.8
13.6055		10.8197
13.1216		12.0521
18.5		13.3672
13.9255		13.5223
12.695		12.1728
14.18		11.3931
13.2445		12.3176
13.0295		10.6884
13.3717		14.0519
14.0429		13.5273
13.8831		13.2118
16.5881		12.907
14.7667		14.0329
13.7801		15
16.1406		10.9901
14.8237		10.979
14.7626		10.9981
13.6882		11.88
15.3128		12.8122
14.6041		9.9
13.9843		18.3096
14.4588		18.3764
13.9012		16.8
13.4254		14.4774
12.3005		16.0105
11.5848		15.8186
14.8061		14.2858
13.2527		16.4711
15.1753		16.66
14.2979		15.6
16.749		15.1889
14.7371		15.575
12.9595		16.1382
13.1609		15.2451
12.8978		15.1396
13.0991		11.2716
13.0471		14.0129
12.8474		12.1974
12.1393		10.9934
11.39		11.8115
11.257		10.7834
11.147		11.2305
11.4231		12.6197
11.1299		13.7628
11.7626		14.0077
13.6659		13.0447
7.3		12.9491
13.1794		12.7875
14.0901		13.0386
13.631		13.2952
12.9224		13.0787
14.0013		12.4019
15.1091		11.8426
13.6426		12.1123
15.1194		15.1021
12.9373		12.3851
13.4061		13.1712
14.1967		13.4132
14.0978		13.554
8.89184		13.1202
14.8141		13.2722
15.8353		14.1185
16.5733		12.9119
13.6264		13.9416
15.2362		15.7374
13.0636		13.0459
12.2822		14.6362
13.7947		14.7023
15.0499		13.0858
13.2405		15.809
13.0154		16.1
12.8837		13.2866
13.5491		11.278
13.9688		11.3263
12.707		10.8129
15.894		10.6891
15.0542		11.1215
13.8672		12.5268
14.778		12.3091
18.3104		14.825
14.1759		14.1179
14.8081		14.5626
15.2802		14.375
13.8886		15.4
13.7318		12.6193
14.72		11.9953
13.7468		11.2684
14.1483		8.88875
13.7334		14.2898
13.3641		8.64
16.1333		13.4232
13.759		9.69474
16.4866		13.6957
15.95		14.2079
18.7		13.2844
13.6459		12.9221
16.09		12.6026
13.8124		13.563
14.2016		12.7629
12.5462		15.5826
12.2135		9.41872
12.3606		12.4263
12.405		11.1317
12.4		12.4519
12.3724		12.8444
12.2619		13.6739
13.0465		14.8587
12.2972		10.2
12.6565		15.5174
13.7214		8.51367
13.5373		13.3
14.7629		10.9476
13.4161		12.8906
13.3016		12.8758
13.5703		12.7688
13.8274		13.5326
14.9784		13.5885
15.9664		11.1762
14.5708		13.0627
14.3207		14.1
14.0221		12.2857
13.8911		14.4275
14.5317		11.4
14.1114		15.2204
15.8921		12.8826
15.3684		13.16
16.0086		14.836
14.7654		15.5944
11.0558		16.6355
13.1629		11.2375
14.378		10.6932
13.697		14.1134
14.3969		11.6181
10.509		11.6346
11.3974		13.0826
11.4232		13.0144
11.5219		12.4431
11.5326		12.2229
11.1058		13.0463
10.8		12.9707
13.35		12.2763
10.3786		13.9081
10.3316		12.7857
12.1		8.53968
14.094		13.9815
11.1148		13.5278
9.5		11.6591
12.2		11.9716
14.2786		12.4061
8.4		9.21507
14.0038		10.9214
12.3421		14.1912
11.4798		11.197
9.87217		10.5492
18.5		9.7061
11.137		8.0895
13.7		11.1551
12.1918		13.8088
14.6303		10.8632
15.0551		12.2851
15.3951		13.8911
13.9553		12.1417
13.4712		14.034
16.8		9.56706
12.6921		11.3524
15.1757		6.69968
14.419		11.7462
14.5535		11.9647
14.2929		12.2541
14.6324		12.8893
14.3831		12.9763
14.7917		12.5725
14.4387		13.0085
12.1		13.7808
12.5571		13.6093
15.492		11.346
14.0875		13.4631
13.2917		9.51574
14.6461		14.2173
16.5518		10.1439
16.2412		12.3853
16.6		13.5975
16.1273		13.3317
16.1915		13.2478
16.9789		13.6573
13.8035		8.04962
15.0419		11.8375
15.6456		10.9136
14.3067		10.9614
13.9398		10.2039
13.1948		11.1444
13.3663		14.8079
13.5668		13.4067
13.4836		11.7632
11.2843		14.6733
11.1556		12.4074
11.7888		11.1874
12.5373		12.3265
13.496		15.2552
13.5817		9.7
13.4322		11.9942
13.8262		9.81277
13.0228		13.436
13.4625		13.1101
13.0001		13.7957
13.1044		14.827
12.6839		15.769
13.3704		17.6357
13.4		12.0288
12.3836		15.5608
7.40728		14.2886
7.30691		12.8566
7.07464		12.5486
13.2196		12.4555
12.0207		13.2976
12.6747		11.5759
11.7334		12.8692
13.6483		13.2932
13.3588		13.7757
12.7443		13.7293
12.1189		14.2802
14.4		13.0894
12.619		12.9948
13.8		12.1655
12.2625		11.84
13.7557		4.15
11.8356		10.85
12.8429		12.3223
12.3898		12.6729
13.2135		17.9989
13.0405		2.9
13.1373		13.8547
13.3738		13.0628
13.4047		12.985
14.1346		9.1537
14.7471		10.8741
12.7		13.8957
13.46		7.35
15.0792		10.9263
15.1528		16.6743
15.2642		14.3844
14.5835		17.1417
15.1689		13.6
14.7817		10.1931
16.7125		3.75
14.7226		18.1
14.626		16.2974
14.3353		10.7388
15.2511		17.4
12.7403		12.6
15.2702		12.9116
13.4		11.1
13.4796		12.9234
14.5983		13.0477
13.0823		13.3683
14.3014		12.2148
14.2081		14.5344
15.0233		11.9037
15.5261		11.9527
15.2555		11.4894
16.4441		11.8192
14.4227		11.8647
15.2487		12.395
16.3251		12.8194
13.7651		12.2284
13.4849		12.8185
12.6869		10.8572
13.8259		10.1709
13.6117		12.6071
14.4072		8.94936
11.5425		2.13061
11.8917		9.84
14.0333		10.7763
15.3227		11.9376
11.6284		10.5497
11.0488		12.2068
11.5282		12.8984
13.9385		13.4043
17.229		10.6107
16.085		12.0743
15.357		13.1723
15.6509		14.7422
13.7718		15.8668
13.8245		12.9831
13.7139		11.8403
13.262		11.7738
13.0182		10.5697
13.1683		3.5
13.1803		11.0751
13.3665		12.0105
13.1605		11.0274
13.4747		11.1252
14.223		11.289
14.428		10.8776
14.9293		10.9365
14.719		13.6757
14.5324		13
14.2252		17.2175
13.9617		14.5578
9.89502		12.6848
6.80323		10.5028
6.40422		15.4203
15.9263		13.3198
17.5673		11.6251
15.1878		13.9962
15.7025		12.8088
15.6615		12.4974
15.0027		12.94
15.8281		12.5419
13.4103		13.0747
11.9661		12.7091
14.5641		12.9645
15.0364		14.3
14.7476		14.8429
15.804		13.0821
15.8896		13.9791
15.8703		14.0595
14.889		15.7
15.7		10.3414
14.191		12.9155
14.5599		13.1628
14.1767		13.0401
14.3191		11.9056
12.6024		12.0613
13.7296		14.1874
13.8861		11.8516
12.6901		12.9381
14.0818		12.3563
12.3818		14.7613
14.6784		15.2532
14.4548		10.1411
15.8888		13.7495
13.5143		11.4488
16.063		10.35
16.1682		13.0172
14.1757		13.0032
14.1451		18.4596
13.3175		18.4328
14.0032		12.6539
17.7135		19.8808
18.3361		9.9315
19.089		13.8717
16.803		13.1089
18.4272		11.0819
13.2336		11.804
14.5254		12.476
11.3849		14.6358
11.5899		14.8866
13.3047		15.5455
12.9123		12.2812
12.6875		13.9889
12.4606		15.0636
11.9455		16.7863
11.3		17.2064
16.5472		11.2417
16.9347		12.3036
14.2083		13.0241
9		12.8184
12.75		12.7475
15.8016		12.6607
16.41		12.9789
17.2123		12.359
16.4308		13.1548
18.0301		12.5601
18.6939		12.754
13.2367		10.3006
14.525		10.6732
15.5367		10.7
17.0547		9.3813
16.9602		16.8453
18.0594		17.2719
10.5		15.7
18.092		12.9817
16.899		13.7
18.116		15.2239
17.1919		15.6775
15.0028		15.5088
14.5216		14.4222
13.0788		14.0635
12.7802		13.525
15.0477		14.0381
13.4914		15.2872
13.9413		10.8807
12.5534		13.84
12.8891		13.4
12.4581		15.9
13.7364		14.725
12.665		14
13.6154		16.645
13.5311		14.9819
12.7315		13.9677
12.4915		12.4581
17.6		12.697
14.7616		13.3794
11.9488		14.0732
12.1165		15.5045
10.5047		19.2855
14.5816		19.3744
14.8111		17.0529
15.5188		16.2956
15.3957		10.3339
13.2299		17.9736
13.3301		14.1235
13.0782		11.5683
11.3952		12.1501
12.78		11.8224
15.2754		11.2529
11.7219		12.8599
12.9408		12.7572
11.6973		12.6056
9.7955		12.5659
12.329		11.8081
10.8141		8.5466
12.0909		14.2902
13.4248		15.4698
13.2957		14.5382
11.1053		10.5341
13.205		10.5256
14.0961		10.2727
11.117		15.0128
11.1072		14.6229
12.651		14.6908
13.9215		13.2888
12.1626		12.564
13.6041		7.2632
9.17275		9.5071
12.9155		9.02186
11.2568		11.1927
11.8249		12.1044
9.90679		13.3959
9.45126		15.0471
11.595		15.1201
9.62869		14.7966
10.867		12.9
9.04754		14.5165
13.6068		17.5
10.0325		14.7955
11.9309		14.4139
13.9755		14.2094
12.8406		12.0431
11.3617		14.2375
10.3861		14.3684
10.8854		12.1349
9.7814		14.8348
9.88		8.65769
11.8194		11.3146
10.9208		12.898
13.1111		13.3181
9.47381		15.9
11.5563		12.803
12.6338		11.2851
13.519		12.8247
10.05		13.8631
13.1052		13.4062
12.3944		13.0828
11.4317		13.3101
9.40504		15.0922
12.4651		13.8938
11.8569		13.9654
8.61406		13.7539
13.2739		13.3288
11.2365		12.5323
11.7584		12.4667
13.242		15.799
9.39427		15.6898
13.1613		15.9353
9.39803		15.6579
13.1362		14.5875
13.0502		14.7427
11.0919		14.0959
13.7107		14.5665
15.5808		14.8441
15.3991		12.7716
11.6083		10.8871
11.4453		15.0738
10.6254		15.6945
10.8416		11.7607
20.4		11.472
8.58075		12.1866
12.3698		13.5889
16.0043		13.4913
10.8955		12.4881
11.8492		13.449
13.2231		13.9136
14.3037		14.5207
11.18		11.073
11.0542		11.649
14.417		11.4081
13.0295		12.075
6.54444		12.5118
9.42872		12.3988
12.9408		12.9456
10.3381		10.9205
10.1453		12.4339
12.8955		11.6086
10.2421		7.44444
9.76571		12.2334
13.381		14.2548
12.0599		13.2694
10.42		17.6
11.1545		13.1816
13.5342		15.5533
8.75856		18.617
13.6197		16.4543
11.052		0.2
10.0937		12.6776
8.12563		12.606
15.5924		13.0664
15.1471		13.5316
10.2258		13.0892
12.3286		10.8184
10.701		12.5457
10.1932		11.9877
8.86212		10.9194
8.83778		12.4156
14.1181		11.654
16.4		14.4554
10.2567		13.3095
9.77921		13.2825
11.1034		12.9767
10.8692		12.405
8.52528		13.8872
16.4058		10.9207
14.3789		12.699
14.3215		13.7175
8.43968		11.2625
10.3536		16.3778
9.85		16.3174
12.2257		14.5397
11.2834		14.8766
10.7667		13.81
8.9453		13.6921
9		12.0814
9.40591		13.525
9.1727		13.4948
8.1666		12.7936
10.2494		11.0659
9.7421		13.0144
9.31849		12.1137
13.7013		11.9408
7.3284		13.3231
7.55111		12.7649
7.075		13.4177
12.2684		13.7327
10.3636		15.7651
9.92163		12.3853
7.02222		15.7513
13.2143		15.2638
11.4812		15.688
8.06757		9.61922
15.1667		9.89127
9.18571		13.468
10.2684		12.2521
9.84499		15.75
10.1797		11.5823
4.2		8.53881
8.625		11.5661
12.5143		8.56901
11.1238		16.653
18.5		18.4371
10.0897		15.9244
6.51333		14.2653
9.45		15.2278
8.05702		13.5046
11.7062		13.9136
12.046		8.48194
11.1657		15.3837
8.28		11.2088
7.95		11.108
0.35		8.18046
9.87229		13.4333
8.89418		8.37
10.1101		9.47564
5.9		9.14951
14.0594		8.97446
8.13907		9.59169
10.9615		6.17493
9.1137		10.7017
9.33194		12.7456
8.58768		12.3016
10.3222		12.3472
9.15695		14.5488
12.8769		15.7778
5.15		16.711
12.1004		16.0785
9.57262		11.8973
12.727		12.1685
9.92837		12.6687
7.2625		13.0317
9.59333		13.5039
8.7366		13.3523
13.6614		13.0964
13.6816		14.5653
2.6		13.6077
11.2486		13.4911
9.87143		13.1754
10.9423		14.9557
8.34286		14
10.3583		12.8782
14.1578		13.5901
0.85		14.712
13.3821		14.7099
17.7		14.7585
16.75		14.6009
9.64545		14.5548
10.325		15.5128
15.1		13.5483
12.5743		15.873
10.675		14.9917
14.0027		13.1313
5.3		13.072
10.95		14.0561
13.9184		13.1467
14.0283		12.4639
17.2		13.0496
16.3		14.2472
18.2		13.8601
14.0733		14.2002
15.0302		14.8737
7.85		11.9982
22.8		13.0329
17.8		12.7828
15.1271		12.8499
15.1575		10.6099
14.2759		9.6
14.3204		13.2305
15.0262		11.1043
13.9362		12.173
15.8968		13.0679
14.8545		13.4176
13.884		13.0473
15.75		12.2812
11.4311		12.3276
15.8602		12.0455
14.7111		13.0495
16.0641		12.5009
9.71429		12.0465
14.0825		13.4968
13.8315		13.7025
14.9913		13.2186
14.7894		14.6786
14.9808		12.4745
14.1565		11.819
14.3563		12.5294
13.8554		12.3961
13.3271		12.6862
14.4299		12.5774
12.4117		13.3591
14.608		12.1185
14.6294		13.9306
11.9		11.4588
13.0859		12.2422
14.7161		13.8314
13.0925		11.2913
14.283		12.3535
13.8616		10.9569
14.6318		11.6927
15.8087		12.2532
13.8489		12.9574
13.8344		14.4881
13.5655		14.2538
13.3093		15.6691
12.8946		15.6263
11.9511		11.8672
14.4927		11.7895
14.5559		11.8946
14.5778		13.3756
13.5868		11.0988
13.0559		9.98754
14.9029		12.6491
14.0261		14.0206
15.7328		14.1821
16.5879		13.1509
16.5307		13.1436
13.9493		13.1842
13.7122		13.1274
14.332		13.2646
12.038		13.3169
10.2112		13.5073
12.4634		15.2859
11.9053		13.4897
12.8112		18.6416
12.82		15.975
15.0194		18.5884
13.7106		12.4512
11		14.4827
14.3352		11.1327
14.1771		11.9583
14.1515		13.6393
12.1453		12.0667
13.1707		12.8325
11.1693		13.4813
14.0552		13.0182
15.3719		10.0001
7.2		11.2986
14.1481		12.5328
15.2014		14.225
15.2413		14.0104
14.5877		12.8466
13.695		14.2051
14.5173		11.9585
15.3712		14.7159
14.0417		15.5
15.3688		10.8098
14.5882		11.6897
14.7529		11.1379
13.1301		11.9151
13.885		11.3134
13.7517		11.2101
15.0199		10.5571
13.2543		13.6759
15.7776		13.7923
14.8299		14.4216
14.2691		14.6
13.8724		14.214
13.4585		15.2333
14.7		16.4667
14.8688		16.2
14.0971		15.5
14.322		13.3986
12.4114		9.30669
13.9805		11.2075
14.1319		10.8068
13.3552		13.16
14.7724		13.7192
13.8199		13.4205
14.4695		13.7693
13.6655		6.6
10.7		13.7835
12.3346		13.5915
12.5715		12.8772
12.392		14.7594
12.3312		16.3
12.632		10.3922
12.6741		13.4712
12.7997		14.5
12.7299		13.7644
13.2694		14.8889
13.2836		14.3818
15.3881		15.0399
13.1062		11.6806
12.9766		14.811
13.2992		10.6195
14.0276		9.9
14.0026		15.4685
12.4949		17.1585
12.6205		13.3333
12.6501		17.2184
12.4471		16.5528
12.8914		11.4883
15.5		11.3561
13.0095		12.6989
12.6217		12.75
13.7896		13.1304
13.4355		13.8341
13.4714		14.5333
13.9216		13.5903
13.6449		14.3
13.9847		13.551
14.6378		12.9393
14.4896		12.5111
13.8527		13.0705
13.8125		13.2342
13.2017		13.4952
12.6599		12.0556
12.0302		13.5094
12.493		13.3152
10.3418		13.4257
9.67287		12.0162
9.6646		13.7092
12.9637		13.9355
9.19578		13.9574
8.69082		16
8.14271		12.1662
9.68132		11.14
12.3277		10.5056
13.5535		14.3091
12.9892		13.3321
13.4265		13.284
13.0861		12.8461
12.9597		13.4429
10.7862		13.235
12.0784		13.4735
13.1304		13.7928
13.4199		11.7647
13.9358		13.7025
14.0396		13.8458
13.8682		11.4
14.22		14.0592
14.2075		14.0497
14.0695		14.5676
14.0454		14.3314
12.6409		11.9156
15.3305		11.2778
16.8707		10.8714
16.1404		11.3447
12.4528		11.8332
15.9991		12.2494
13.6508		12.4693
16.2447		11.0599
14.8464		10.8934
13.7768		13.0026
13.7182		13.9563
13.5544		10.6592
11.9907		12.4908
12.6422		12.3835
11.9718		12.2675
13.2097		13.9384
16.8298		14.0938
11.9281		13.7092
12.0132		10.436
13.3071		13.9111
11.7172		13.7256
15.1185		15.9119
13.0896		15.917
15.007		15.7348
14.8769		15.5552
16.6894		14.9333
16.2722		15.0086
17.3781		15.9072
17.4321		15.6192
18.1158		13.7706
14.1578		13.7426
14.1231		13.7514
14.6289		13.6642
14.1078		14.0799
14.3074		14.2791
14.4506		14.8348
14.7079		14.8211
14.3045		15.8679
13.0155		14.625
13.2623		13.2131
15.32		14.8619
12.5604		12.6172
12.3486		12.4166
7.6		12.85
12.7482		12.5784
13.7635		12.6587
14.1665		12.4931
12.7898		12.9332
12.7736		12.5688
12.3161		13.6067
12.3408		16.2
13.7666		11.9628
11.8741		12.0821
12.6851		12.3225
11.8191		11.6795
13.9556		13.3102
12.6857		15.4214
12.3193		15.4746
12.4685		14.9534
14.9		14.3341
12.1573		10.8563
13.5394		11.1225
13.6029		13.0015
11.2553		12.377
11.2575		12.3773
14.7343		14.7517
13.3731		10.9924
12.9479		12.7439
12.6114		11.631
11.6259		6.2
13.7662		11.8091
11.2		11.3817
12.3841		10.0391
11.5318		10.2861
13.3		11.6337
11.2447		13.5152
12.6559		11.3
11.2152		12.2509
11.3776		10.8
14.65		12.0158
13.28		13.3599
13.2395		14.8182
13.5393		15.1437
7.1		14.0398
12.4492		15.5861
12.6484		15.6646
13.1291		17.5
9.2		15.2784
13.5523		13.5203
12.6979		12.8943
12.6439		12.1
12.9386		13.41
13.4882		15.3129
13.6213		16.2713
13.7785		15.3477
12.3667		12.6506
13.5135		12.353
13.6167		13.4656
14.5523		11.6633
11.6143		11.1968
12.697		11.2558
13.1267		11.8427
10.4078		11.03
14.9005		13.0149
12.9577		11.7778
14.1623		11.2412
14.7532		13.8192
14.0121		11.1627
13.6736		12.1674
15.1777		12.8141
13.4061		12.5886
12.75		12.1712
14.592		12.8174
15.2786		12.2088
13.7781		12.6063
12.775		12.9848
13.2409		13.2919
13.4286		11.5631
13.919		11.9634
11.6364		13.0992
14.5		12.2736
11.9286		13.5171
12.4859		11.8824
12.4278		12.8192
12.8097		12.1632
13.6769		12.0208
12.5045		11.6099
13.7748		11.8607
13.5076		11.9938
14.3249		12.1156
12.6059		11.168
13.7839		12.1412
13.1631		10.3921
14.5831		11.2665
14.0425		10.7041
13.9308		11.8923
14.2422		11.4217
13.7289		11.6495
14.5404		10.5959
13.8718		7.81122
13.764		12.0575
13.9597		11.2455
13.674		12.4971
13.1902		11.1462
14.8522		14.686
12.8405		9.95153
14.4816		9.7514
12.2575		13.7411
12.4282		12.3151
15.9		11.4044
11.299		13.2718
13.2952		11.0309
13.875		12.1299
11.5		13.592
14.6133		10.3879
15.2935		13.3206
15.2833		12.9285
15.2242		7.77775
14.6215		11.0784
13.5211		10.507
14.6298		8.67267
14.1499		12.1777
15.8818		12.4141
13.3892		14.254
10.6714		13.2348
13.325		13.51
15.225		14.4577
13.0592		12.6
13.7781		11.2404
12.9301		11.8865
12.2861		13.3906
12.1182		11.8695
14.279		13.3822
13.0136		13.0671
14.0906		12.0508
16.2538		12.095
15.2051		11.9667
15.9755		12.3316
16.2863		12.2264
14.636		12.3706
14.1567		11.5248
14.5808		12.2596
13.019		11.9323
12.4596		12.11
14.1856		10.575
14.2541		13.1765
[truncated: 782 more rows]

## Sheet: Figure 4
Ship Type	Dataset	Number of ships	Speed	Standard deviation of speed
Cargo	DURING COVID-19	1014	12.3955	2.34176
Cargo	PRE-COVID-19	1008	13.5277	1.92335
Fishing	PRE-COVID-19	2	9.50893	1.64907
High Speed Craft	PRE-COVID-19	2	10.523	0.232892
Other	DURING COVID-19	2	11.5334	0.448914
Other	PRE-COVID-19	7	12.2574	2.05091
Passenger	DURING COVID-19	169	11.277	2.08925
Passenger	PRE-COVID-19	308	13.738	1.5178
Pleasure Craft	DURING COVID-19	72	10.9395	3.18454
Pleasure Craft	PRE-COVID-19	211	12.6842	2.98677
Sailing Vessel	DURING COVID-19	3	10.8766	2.0523
Sailing Vessel	PRE-COVID-19	3	13.7501	1.53922
Search and Rescue	DURING COVID-19	1	12.85	NA
Special Craft	DURING COVID-19	93	11.7957	1.54335
Special Craft	PRE-COVID-19	98	13.6042	1.94408
Tanker	DURING COVID-19	885	12.3629	2.20994
Tanker	PRE-COVID-19	857	13.6683	1.67985
Tug	DURING COVID-19	51	11.0441	2.85447
Tug	PRE-COVID-19	72	12.3081	2.64776
Unspecified	DURING COVID-19	4	12.8948	1.87142
Unspecified	PRE-COVID-19	1	13.7328	NA

## Sheet: Figure 5
Date	Ship Type	Number of Days	Dataset
2020-08-01	Cargo	1.87879	DURING COVID-19
2020-08-01	Fishing	1	DURING COVID-19
2020-08-01	Passenger	7.21212	DURING COVID-19
2020-08-01	Pleasure Craft	1.42857	DURING COVID-19
2020-08-01	Special Craft	4.26316	DURING COVID-19
2020-08-01	Tanker	1.54286	DURING COVID-19
2020-08-01	Tug	1.09091	DURING COVID-19
2020-07-01	Cargo	1.96098	DURING COVID-19
2020-07-01	Other	1.5	DURING COVID-19
2020-07-01	Passenger	6.76923	DURING COVID-19
2020-07-01	Pleasure Craft	1.5	DURING COVID-19
2020-07-01	Special Craft	3.90476	DURING COVID-19
2020-07-01	Tanker	1.60185	DURING COVID-19
2020-07-01	Tug	1.27273	DURING COVID-19
2020-07-01	Unspecified	2	DURING COVID-19
2020-06-01	Cargo	1.9668	DURING COVID-19
2020-06-01	Passenger	8.45714	DURING COVID-19
2020-06-01	Pleasure Craft	1.2381	DURING COVID-19
2020-06-01	Sailing Vessel	1.66667	DURING COVID-19
2020-06-01	Search and Rescue	1	DURING COVID-19
2020-06-01	Special Craft	3	DURING COVID-19
2020-06-01	Tanker	2.03352	DURING COVID-19
2020-06-01	Tug	1.93333	DURING COVID-19
2020-09-01	Cargo	1.78191	DURING COVID-19
2020-09-01	Passenger	5.53571	DURING COVID-19
2020-09-01	Pleasure Craft	1	DURING COVID-19
2020-09-01	Special Craft	4.92857	DURING COVID-19
2020-09-01	Tanker	1.60131	DURING COVID-19
2020-09-01	Tug	1.5	DURING COVID-19
2020-09-01	Unspecified	1	DURING COVID-19
2019-12-01	Cargo	1.76305	PRE-COVID-19
2019-12-01	Other	1	PRE-COVID-19
2019-12-01	Passenger	5.86667	PRE-COVID-19
2019-12-01	Pleasure Craft	1.2449	PRE-COVID-19
2019-12-01	Sailing Vessel	1	PRE-COVID-19
2019-12-01	Special Craft	2.91304	PRE-COVID-19
2019-12-01	Tanker	1.4802	PRE-COVID-19
2019-12-01	Tug	1.83333	PRE-COVID-19
2020-02-01	Cargo	2.04867	PRE-COVID-19
2020-02-01	Passenger	6.68116	PRE-COVID-19
2020-02-01	Pleasure Craft	1.38636	PRE-COVID-19
2020-02-01	Special Craft	3.75	PRE-COVID-19
2020-02-01	Tanker	1.53097	PRE-COVID-19
2020-02-01	Tug	2.75	PRE-COVID-19
2020-01-01	Cargo	2.03636	PRE-COVID-19
2020-01-01	Fishing	1	PRE-COVID-19
2020-01-01	High Speed Craft	1	PRE-COVID-19
2020-01-01	Other	2	PRE-COVID-19
2020-01-01	Passenger	6.92754	PRE-COVID-19
2020-01-01	Pleasure Craft	1.44304	PRE-COVID-19
2020-01-01	Sailing Vessel	1	PRE-COVID-19
2020-01-01	Special Craft	3.54545	PRE-COVID-19
2020-01-01	Tanker	1.70815	PRE-COVID-19
2020-01-01	Tug	2.86364	PRE-COVID-19
2019-11-01	Cargo	1.91045	PRE-COVID-19
2019-11-01	High Speed Craft	2	PRE-COVID-19
2019-11-01	Other	1.5	PRE-COVID-19
2019-11-01	Passenger	6.27273	PRE-COVID-19
2019-11-01	Pleasure Craft	1.56364	PRE-COVID-19
2019-11-01	Special Craft	4.13333	PRE-COVID-19
2019-11-01	Tanker	1.71296	PRE-COVID-19
2019-11-01	Tug	2.2	PRE-COVID-19

## Sheet: CPA
CPA Data PRE-COVID-19											CPA Data DURING-COVID-19
Ship MMSI	CPA	Speed	Latitude	Longitude	Bearing	# AIS Messages	Date	Ship Type			Ship MMSI	CPA	Speed	Latitude	Longitude	Bearing	# AIS Messages	Date	Ship Type
563050500	14578.6	15.4	25.794	-77.2579	265.879	974	2019-10-29 00:00:03	Cargo			311000259	7402.86	16.8	25.7716	-77.1778	241.438	70	2020-06-01 02:47:39	Cargo
636016972	14422.4	12.7	25.6796	-77.0688	162.184	223	2019-10-29 01:46:04	Cargo			356883000	1162.16	15.7	25.795	-77.1198	216.101	4944	2020-06-27 15:23:40	Passenger
311000396	22180.4	19.1	25.7137	-76.9153	116.73	49	2019-10-29 00:00:07	Passenger			218842000	4950.37	16.5	25.7599	-77.1241	192.95	1145	2020-06-01 02:36:51	NA
376609000	48100.1	5.4	25.8079	-77.5926	270.698	208	2019-10-31 10:10:16	Cargo			249973000	4561.63	13.3	25.7938	-77.0687	103.664	50	2020-06-08 14:02:00	Passenger
577349000	18225.9	16.5	25.786	-77.2936	263.925	306	2019-10-30 03:48:20	Passenger			248939000	2087.25	13.8	25.7885	-77.1003	142.803	574	2020-06-20 11:57:13	Passenger
518630000	66784.5	9.4	25.7547	-77.7766	265.482	48	2019-10-29 00:00:18	Cargo			309697000	1021.96	10.3	25.7947	-77.1097	161.438	2788	2020-06-24 19:39:44	Passenger
353479000	18555.9	15.1	25.7039	-76.9642	126.572	62	2019-10-29 00:24:35	Passenger			563758000	67165.9	14.2	25.9833	-77.753	287.485	2	2020-06-01 00:38:46	Cargo
311000599	24580.4	20.1	25.6509	-76.9351	133.546	1708	2019-10-29 07:24:49	Passenger			308017000	2417.26	13.6	25.7818	-77.1102	173.44	199	2020-06-01 15:08:22	Passenger
375903000	11118.8	11.7	25.7269	-77.0413	139.868	1127	2019-10-31 02:25:47	Cargo			353729000	2507.71	13.7	25.781	-77.1163	187.629	1623	2020-06-01 15:09:51	Cargo
319040000	4920.09	10.3	25.8343	-77.1482	314.252	2001	2019-10-29 03:36:51	Pleasure Craft			352306000	4348.73	13.5	25.7876	-77.0733	113.954	1534	2020-06-01 14:59:22	Special Craft
367125330	27480.1	9.3	25.7486	-77.3801	257.225	283	2019-10-29 01:46:13	Tug			377913000	5096.96	16.5	25.7626	-77.1364	207.385	6563	2020-06-01 02:39:21	Cargo
373022000	6670.55	9.7	25.8487	-77.1568	318.951	1658	2019-10-29 05:13:24	Special Craft			518403000	4951.54	16.6	25.76	-77.1246	193.542	429	2020-06-01 02:36:57	Pleasure Craft
309908000	53799	11.7	25.5577	-77.5752	239.561	622	2019-10-29 03:00:35	Passenger			370039000	1076.96	13.2	25.7971	-77.1049	131.275	2964	2020-06-25 07:50:11	Passenger
310500000	5462.54	17.7	25.7556	-77.1262	194	2397	2019-10-29 05:40:04	Passenger			249047000	2627.36	13.7	25.7805	-77.1197	194.841	667	2020-06-01 15:10:41	Passenger
319011700	68850.1	12.9	25.8715	-77.7956	276.468	1	2019-10-29 02:49:19	Pleasure Craft			355831000	1422.67	15.1	25.8048	-77.1271	275.912	2849	2020-06-04 12:02:05	Passenger
229796000	16081.7	18	25.6714	-77.0465	155.6	1189	2019-10-29 06:14:54	Tanker			563063200	4442	14	25.765	-77.1255	196.416	3635	2020-06-27 18:14:07	Tanker
353735000	1512.35	9.7	25.8143	-77.1038	37.3491	158	2019-10-29 04:31:17	Special Craft			563422000	5423.1	16.6	25.7554	-77.1027	169.174	125	2020-06-01 02:32:33	Tanker
538004086	91034	16.6	25.9453	-76.2183	79.8104	8	2019-10-29 05:34:25	Cargo			636017070	2538.71	14.4	25.7827	-77.1022	155.017	626	2020-06-01 13:53:08	Cargo
355831000	79976.3	18.8	26.348	-76.5882	40.7641	116	2019-10-29 09:41:05	Passenger			636016337	11725.3	17.1	25.7796	-77.2268	256.924	656	2020-06-01 02:57:08	Cargo
255806153	407.369	10.2	25.8034	-77.117	269.479	2292	2019-10-30 00:41:19	Passenger			259777000	12049.5	16.3	25.6991	-77.147	196.395	24	2020-06-01 05:29:16	Tanker
311478000	3426.53	12.8	25.7727	-77.1095	174.33	3916	2019-10-31 07:24:09	Passenger			354215000	357.556	14.5	25.8002	-77.1128	177.767	1869	2020-06-26 05:50:16	Passenger
210057000	5702.42	16.1	25.7537	-77.1274	194.648	1874	2019-10-31 13:42:33	Cargo			375902000	3164.19	12	25.7785	-77.1283	209.099	5309	2020-06-25 02:10:38	Cargo
354580000	1872.21	11.1	25.8088	-77.0952	71.3684	2246	2019-10-30 06:36:40	Special Craft			311000807	5688.41	12	25.7598	-77.1429	211.742	56	2020-06-08 12:19:29	Passenger
311109000	1169.6	6.8	25.8039	-77.1246	272.304	2697	2019-10-30 10:45:07	Passenger			373932000	11379.4	13.1	25.7089	-77.0685	157.025	459	2020-06-01 06:28:31	Cargo
311042900	736.966	9.6	25.7991	-77.1185	228.857	3831	2019-10-30 00:43:00	Passenger			355833000	3642.6	13.3	25.8065	-77.0768	84.7199	713	2020-06-25 07:42:52	Passenger
371083000	3872.68	16.2	25.7856	-77.1461	239.1	1365	2019-10-31 23:44:02	Passenger			255806068	12128.6	16.4	25.696	-77.136	190.945	128	2020-06-01 05:31:33	Cargo
538006745	2914.4	13.4	25.7802	-77.0992	151.976	941	2019-10-29 11:54:28	Tanker			248372000	7970.37	13.8	25.7484	-77.0618	140.073	8	2020-06-01 15:31:58	Tanker
636017265	2880.16	13.4	25.7811	-77.0982	149.322	1007	2019-10-29 11:54:48	Tanker			636015743	249.893	10.2	25.8024	-77.1108	118.641	2669	2020-06-15 02:47:40	Cargo
366917720	22864	10.5	25.8607	-77.332	286.239	6	2019-10-31 18:31:30	Tug			563089900	2681.26	13.5	25.7835	-77.0977	145.472	485	2020-06-01 15:05:22	Tanker
249831000	147505	10.9	27.0096	-76.487	24.7905	1	2019-10-29 08:51:16	Tanker			311066300	2415.71	13.6	25.7819	-77.1094	171.47	2774	2020-06-01 15:08:11	Tanker
351468000	1123.47	6.7	25.8068	-77.1235	289.189	1277	2019-10-30 10:46:45	Special Craft			305007000	2287.92	13.4	25.783	-77.1096	171.513	1918	2020-06-08 13:51:41	Cargo
563056500	5824.49	10.2	25.7509	-77.111	178.076	800	2019-10-29 14:10:30	Cargo			312491000	4220.98	13.2	25.7774	-77.1437	226.812	1980	2020-06-01 15:16:31	Tanker
235068802	710.005	13.9	25.7971	-77.1136	184.919	923	2019-10-29 15:27:11	Special Craft			538005991	10771.4	13.1	25.7153	-77.1583	204.899	164	2020-06-01 09:23:19	Tanker
319097600	714.765	14	25.797	-77.1128	178.643	1506	2019-10-29 15:27:00	Pleasure Craft			248325000	5016.36	21.1	25.7584	-77.1075	173.807	370	2020-06-20 13:09:31	Passenger
372804000	779.868	13.9	25.7972	-77.1166	207.591	867	2019-10-29 15:27:53	Cargo			255806069	2417.72	13.7	25.7817	-77.1107	174.769	96	2020-06-01 15:08:31	Cargo
314096000	1946.78	10.1	25.8209	-77.1104	7.51526	1931	2019-10-30 00:34:50	Pleasure Craft			308045000	3635.82	9.9	25.8068	-77.149	275.942	2097	2020-06-15 21:19:11	Passenger
377901119	1099.59	9.9	25.7956	-77.1197	217.894	2061	2019-10-30 00:44:19	Cargo			311315000	15394.5	10.7	25.7825	-77.2647	261.307	24	2020-06-10 02:13:24	Passenger
311493000	3336.34	10.3	25.8327	-77.1051	13.4815	1382	2019-10-30 00:30:20	Passenger			248392000	7176.34	13.8	25.7607	-77.1667	228.515	102	2020-06-01 15:56:58	Passenger
228338600	5229.9	9	25.8229	-77.1605	294.439	1686	2019-10-30 05:36:22	NA			477854400	1799.3	11.1	25.7874	-77.1104	171.836	1053	2020-06-03 11:01:08	Tanker
341295000	3405.05	8.5	25.8245	-77.0882	46.5919	572	2019-10-31 03:11:21	Cargo			311000660	256.245	11.7	25.8031	-77.1104	98.6657	4501	2020-06-23 09:35:59	Passenger
215497000	2916.69	10.8	25.8206	-77.0909	49.1305	1312	2019-10-30 06:32:31	Tanker			371861000	3004.95	7.6	25.8205	-77.1362	309.213	1098	2020-06-29 02:41:42	Passenger
308516000	1293.88	7	25.8008	-77.1255	256.684	2546	2019-10-30 10:43:27	Passenger			477792200	2502.84	14.3	25.7824	-77.122	201.291	1576	2020-06-01 13:57:38	Cargo
370355000	4275.57	8.1	25.7889	-77.0734	112.195	1536	2019-10-30 09:06:12	Tanker			255806062	2312.1	14.3	25.7826	-77.1138	182.053	74	2020-06-01 13:55:44	Cargo
311427000	1125.36	6.8	25.8062	-77.1237	285.87	586	2019-10-30 10:46:26	Passenger			220407000	21486.4	16.6	25.6918	-76.9378	125.237	21	2020-06-01 06:11:51	Tanker
218614000	1129.06	7.1	25.8056	-77.1239	282.448	1556	2019-10-30 10:46:07	NA			311527000	42330.3	14.2	25.8352	-77.5336	274.886	4	2020-06-01 07:51:09	NA
371923000	1127.46	6.7	25.8059	-77.1239	283.938	687	2019-10-30 10:46:16	Special Craft			218614000	2340.9	14.4	25.7826	-77.1088	169.937	4242	2020-06-01 13:54:38	NA
311000504	1156.17	6.7	25.8044	-77.1244	275.208	1182	2019-10-30 10:45:26	Tanker			372804000	4111.69	17.2	25.7672	-77.1216	192.157	705	2020-06-25 16:57:30	Cargo
311000081	2584.58	6.4	25.8264	-77.1178	349.175	1347	2019-10-30 10:58:06	Cargo			376609000	11376	13.2	25.7105	-77.0648	154.99	13	2020-06-01 06:29:30	Cargo
311000341	2067.03	8.4	25.8095	-77.0934	71.0172	1252	2019-10-31 03:04:30	Passenger			538003268	91576.5	21.2	26.1397	-76.2775	65.7006	3	2020-06-01 05:50:29	Tanker
310679000	15611.4	18.5	25.6701	-77.1631	198.726	1604	2019-10-30 15:27:53	Tanker			319111300	29779.3	10.8	26.0414	-76.9746	27.5703	180	2020-06-24 19:16:53	Pleasure Craft
377901104	17911	10.2	25.8296	-77.2892	279.382	1044	2019-10-30 19:14:38	Cargo			538005088	5552.41	13.4	25.7976	-77.058	96.735	23	2020-06-08 14:04:49	Tanker
566165000	4759.76	11.7	25.7645	-77.0928	155.056	1654	2019-10-30 23:10:10	Unspecified			636018693	23820.8	11.7	25.7857	-77.3497	265.299	7	2020-06-08 13:17:39	Cargo
636016431	8284.73	16.7	25.7295	-77.1251	188.41	821	2019-10-30 21:35:40	Cargo			576532000	29532.9	12.7	25.81	-77.4074	271.475	25	2020-06-08 10:20:12	Cargo
309697000	4073.37	11.8	25.7728	-77.0905	146.675	1241	2019-10-31 00:38:41	Passenger			319147800	133298	0.1	25.8072	-78.4422	270.467	3	2020-06-01 09:23:37	Tanker
241570000	2877.96	11.8	25.7785	-77.121	196.156	1449	2019-10-31 00:47:11	Tanker			311000619	2852.95	14.4	25.7827	-77.0961	143.785	316	2020-06-01 13:51:44	Tug
352812000	19032.9	16.2	25.8031	-77.3027	269.924	6	2019-10-31 13:05:56	Cargo			311000617	3676.34	14.4	25.7831	-77.084	128.046	43	2020-06-01 13:49:02	Tug
377901110	2119.92	8.5	25.8103	-77.0932	69.0226	1428	2019-10-31 03:04:51	Cargo			311000616	25289.1	14.4	25.8397	-76.8639	80.7564	30	2020-06-01 12:55:38	Tug
548966000	2887.77	11.9	25.7775	-77.1155	185.032	592	2019-10-31 00:45:42	Cargo			311000618	7368	13.1	25.774	-77.1788	243.612	104	2020-06-01 15:25:12	Tug
477153100	2259.8	8.1	25.7858	-77.1017	150.225	818	2019-10-31 02:53:31	Cargo			720958000	9357.4	13.1	25.7751	-77.2008	250.289	38	2020-06-01 15:30:42	Passenger
566794000	32399.2	11	25.789	-77.4356	267.226	3	2019-10-31 02:16:49	Cargo			538003845	7409.84	10.3	25.757	-77.0597	134.084	17	2020-06-08 19:25:16	Tanker
309333000	328.425	13.3	25.8012	-77.115	219.625	1933	2019-10-31 06:24:42	Tanker			311000799	4006.11	13.2	25.7778	-77.1411	224.603	41	2020-06-01 15:15:52	Tug
377909000	443.672	13.1	25.801	-77.1164	232.253	930	2019-10-31 06:25:02	Cargo			636014739	8848.5	13	25.7237	-77.1172	182.726	501	2020-06-01 09:12:49	Tanker
308865000	296.92	13.3	25.8012	-77.1146	214.746	1323	2019-10-31 06:24:35	Passenger			249338000	2444.43	14.3	25.7824	-77.1204	197.669	288	2020-06-01 13:57:14	Tanker
245304000	210.554	13.3	25.8016	-77.1132	188.043	1240	2019-10-31 06:24:15	Passenger			372270000	2310.94	14.3	25.7826	-77.112	177.741	1685	2020-06-01 13:55:20	Cargo
538001663	212.576	13.3	25.802	-77.1116	140.313	1169	2019-10-31 06:23:49	Passenger			378112306	9551.54	13.1	25.7198	-77.1362	194.049	56	2020-06-01 09:17:41	Tug
370350000	7652.35	16.4	25.736	-77.0963	167.486	8	2019-10-31 07:44:01	Cargo			370636000	156219	4.6	26.1718	-78.619	285.552	6	2020-06-01 09:42:42	Tug
636018722	333.583	13.3	25.8012	-77.1151	220.385	1090	2019-10-31 06:24:42	Tanker			373324000	9833.89	13	25.7187	-77.142	197.161	10	2020-06-01 09:19:09	Special Craft
244638000	267.335	13.2	25.8022	-77.1107	121.012	995	2019-10-31 06:23:35	Cargo			366917720	5826.68	14.1	25.7839	-77.059	111.855	6	2020-06-01 13:43:20	Tug
246506000	199.074	13.3	25.8016	-77.1129	179.005	1067	2019-10-31 06:24:10	NA			538006720	4613	11.9	25.7846	-77.1539	242.945	1334	2020-06-01 22:26:18	Cargo
305361000	722.33	13	25.801	-77.1196	247.408	2039	2019-10-31 06:25:49	Cargo			311045400	3269.49	12.6	25.774	-77.1103	175.336	731	2020-06-01 21:10:30	Tanker
357275000	69672.9	12	25.8638	-77.8047	275.691	2	2019-10-31 07:23:14	Cargo			356436000	12168.4	14.1	25.774	-77.2298	254.394	35	2020-06-01 16:11:58	Special Craft
538006764	5702.24	16.1	25.7536	-77.127	194.236	1319	2019-10-31 13:42:38	Tanker			538005983	4561.5	13.2	25.7769	-77.1477	229.762	181	2020-06-01 15:17:31	Tanker
565592000	3545.27	21.3	25.7716	-77.1167	185.988	1159	2019-10-31 16:39:18	Tanker			309374000	2023.32	13.4	25.7948	-77.0952	118.521	213	2020-06-19 06:04:10	Passenger
370269000	45426.9	12.4	25.8212	-77.5655	272.592	51	2019-10-31 11:41:56	Special Craft			403561000	4393.37	14.4	25.7834	-77.0752	120.563	1487	2020-06-01 13:47:02	Tanker
375939000	5715.79	16.1	25.7529	-77.1245	191.686	1323	2019-10-31 13:43:09	Cargo			312283000	911.698	15.7	25.7962	-77.1172	207.889	1954	2020-06-27 15:23:04	Tanker
309653000	2630.38	16	25.7839	-77.1279	214.636	1245	2019-10-31 23:47:45	Passenger			378390000	156745	4.6	26.1735	-78.6239	285.569	1	2020-06-01 09:46:23	Tug
636016928	6300.65	10.6	25.7487	-77.1298	195.522	1460	2019-10-31 14:57:19	NA			352812000	6205.32	6.3	25.8468	-77.1522	320.846	140	2020-06-25 10:46:35	Cargo
308015000	15808.2	12.6	25.6627	-77.139	189.472	1	2019-10-31 13:48:56	Cargo			577199000	7599.17	11.2	25.7359	-77.0996	169.922	444	2020-06-22 08:51:10	Special Craft
220206000	923.111	16.9	25.7965	-77.1079	147.143	1473	2019-10-31 17:39:31	Cargo			319629000	12317.3	11.7	25.7196	-77.0323	139.112	17	2020-06-30 18:30:41	Sailing Vessel
636018106	911.723	17	25.7959	-77.1094	157.015	1334	2019-10-31 17:39:13	Cargo			311361000	22827.4	14.5	25.8274	-76.8868	83.2427	44	2020-06-01 13:01:38	Passenger
312794000	918.551	17	25.7955	-77.1103	163.032	1089	2019-10-31 17:39:02	Tanker			373695000	2616.28	14.3	25.7824	-77.1247	206.637	1477	2020-06-01 13:58:14	Special Craft
566689000	43236.1	10.9	25.9404	-77.5169	290.737	2	2019-10-31 19:33:42	Cargo			244308000	5877.45	13.2	25.7753	-77.1626	237.788	51	2020-06-01 15:21:12	Tanker
319013100	5162.81	12.9	25.8145	-77.1629	283.85	1000	2019-10-31 21:45:00	Pleasure Craft			311000798	33871.9	14.4	25.8206	-77.4502	273.299	5	2020-06-01 15:17:06	Tug
373959000	2320.5	15.9	25.7826	-77.1151	185.362	1126	2019-10-31 23:50:20	Cargo			351468000	4125.34	17.2	25.7667	-77.1196	189.217	1876	2020-06-25 16:57:54	Special Craft
636091731	2319.72	16	25.7826	-77.1156	186.57	943	2019-10-31 23:50:14	Cargo			215182000	2447.44	13.6	25.7825	-77.1053	161.74	1769	2020-06-01 15:07:11	Tanker
218841000	5282.58	13	25.8231	-77.1609	294.537	6	2019-10-31 21:42:35	NA			982297002	12338	14.3	25.7831	-77.2339	259.439	2	2020-06-01 14:23:02	Search and Rescue
538090308	24001.3	16.6	25.8227	-77.3513	275.189	1	2019-10-31 23:02:20	Tanker			377901104	2019.62	10.7	25.8109	-77.0946	65.6778	7571	2020-06-25 03:44:35	Cargo
248392000	799.375	13.5	25.8083	-77.1188	312.373	7639	2019-11-08 11:05:55	Passenger			312794000	359.146	14.5	25.8002	-77.1124	170.654	37031	2020-06-26 05:50:10	Tanker
311058700	1895.66	16.3	25.7865	-77.1105	172.461	10796	2019-11-30 22:13:31	Passenger			369542000	5269.67	13.3	25.776	-77.1559	234.658	36	2020-06-01 15:19:31	NA
377901119	4223.54	14.7	25.7662	-77.1038	167.505	7928	2019-11-29 19:39:21	Cargo			240990000	2722.04	13.7	25.7803	-77.1219	199.249	2	2020-06-01 15:11:13	Tanker
311000341	8088.47	17.9	25.7816	-77.036	107.469	448	2019-11-01 00:49:00	Passenger			255806153	23901.7	11.2	25.8502	-77.3457	282.626	40	2020-06-08 20:56:54	Passenger
209470000	289975	18.3	27.4158	-79.4065	308.686	1	2019-11-01 10:40:00	Cargo			304746000	154432	13	26.138	-78.61	284.287	1	2020-06-01 15:30:19	Cargo
636016126	5841.22	17.6	25.7518	-77.1249	191.74	1866	2019-11-01 18:48:00	Cargo			210057000	975.349	11.4	25.8095	-77.12	313.94	8094	2020-06-27 19:12:24	Cargo
248513000	2321.31	9.4	25.8243	-77.1155	353.611	3325	2019-11-02 03:59:30	Passenger			377901107	3457.09	11.5	25.7743	-77.1252	200.776	210	2020-06-01 22:17:47	Cargo
371059000	1733.93	21.2	25.7878	-77.1119	176.395	2966	2019-11-21 17:33:31	Cargo			367125330	7964.08	15	25.7684	-77.1823	240.712	861	2020-06-02 02:48:17	Tug
538006979	9545.37	16.1	25.7182	-77.0991	171.707	1550	2019-11-01 14:54:00	Tanker			255806147	5154.99	11.8	25.7592	-77.129	198.06	677	2020-06-02 08:08:26	Tanker
311478000	532.853	11.8	25.8082	-77.1133	356.688	24038	2019-11-09 07:00:22	Passenger			229673000	2683.69	13.7	25.7805	-77.1044	161.511	1591	2020-06-02 11:35:29	Tanker
255806153	198.663	16.5	25.8019	-77.1139	208.208	18936	2019-11-17 02:33:17	Passenger			235108582	2686.66	13.7	25.7807	-77.1036	159.687	1200	2020-06-02 11:35:17	Pleasure Craft
209862000	1698.2	12.9	25.791	-77.1228	215.565	5007	2019-11-29 02:15:31	Cargo			477766200	2684.52	13.7	25.7803	-77.105	162.861	983	2020-06-02 11:35:38	Cargo
311109000	541.652	14.5	25.7988	-77.1147	199.243	17679	2019-11-13 17:59:57	Passenger			312882000	3464.26	12.1	25.7739	-77.1243	199.017	593	2020-06-17 15:03:30	Tanker
305101000	5110.03	15.4	25.7585	-77.1243	192.835	2226	2019-11-01 14:22:00	NA			538008170	5310.1	16.2	25.7555	-77.1109	177.82	1970	2020-06-02 17:30:24	Cargo
636091731	3447.86	12.4	25.7724	-77.1107	176.257	3516	2019-11-29 04:21:33	Cargo			636018123	5311.51	16.2	25.7556	-77.1095	176.297	1235	2020-06-02 17:30:06	Tanker
311000660	1416.13	13.5	25.806	-77.1268	281.786	6091	2019-11-08 11:07:56	Passenger			577349000	5256.44	10.4	25.7576	-77.1263	194.655	333	2020-06-15 03:04:01	Passenger
205460000	699.382	14.7	25.7991	-77.1079	133.544	2716	2019-11-09 15:00:41	Tanker			246524000	5312.12	16.2	25.7555	-77.1129	179.968	979	2020-06-02 17:30:47	Cargo
311000515	8032.77	15.1	25.7329	-77.1315	193.297	1263	2019-11-01 21:34:00	Passenger			636015148	511.21	10	25.7992	-77.1149	202.385	3151	2020-06-16 23:54:41	Cargo
311026700	27297.6	14.8	25.6825	-77.35	240.53	762	2019-11-01 02:58:00	Tanker			374318000	3189.56	14.6	25.7829	-77.1352	224.268	1240	2020-06-02 18:49:01	Cargo
248089000	146041	14.3	27.1066	-77.3329	351.454	51	2019-11-01 08:21:00	Cargo			377901111	5238.76	8.7	25.8412	-77.1444	323.179	6004	2020-06-05 13:48:19	Cargo
636012465	247831	14	28.0231	-77.4202	353.032	19	2019-11-01 05:46:00	Tanker			355068000	6107.76	13.6	25.7524	-77.1359	202.037	2978	2020-06-02 20:48:01	Special Craft
375903000	2578.01	17.7	25.7865	-77.0953	136.748	1656	2019-11-03 09:25:16	Cargo			563039400	8017.09	13.7	25.7658	-77.1812	238.505	1031	2020-06-02 20:59:23	Cargo
538006666	237992	14.3	25.699	-79.4823	267.712	1	2019-11-01 07:48:00	Tanker			311000905	2932.7	16.1	25.7786	-77.1029	160.011	1564	2020-06-03 09:00:18	Cargo
311000592	9298.69	14	25.7195	-77.113	180.025	2844	2019-11-06 18:19:00	Tanker			244044000	6344.16	11.9	25.7462	-77.1137	180.681	2501	2020-06-27 21:45:34	Cargo
354857000	1945.79	12	25.7873	-77.1054	157.284	1530	2019-11-01 23:16:00	Cargo			244850854	2934.04	16.1	25.7787	-77.1025	159.222	2089	2020-06-03 09:00:24	Cargo
248024000	232575	13.6	27.8522	-77.622	347.612	45	2019-11-01 05:50:00	Tanker			538006314	2932.92	16	25.7783	-77.1038	161.974	1086	2020-06-03 09:00:06	Tanker
311053500	5901.68	13.1	25.7502	-77.113	180.012	1559	2019-11-01 10:01:00	Cargo			303270000	2934.38	16.1	25.7781	-77.1044	163.074	1097	2020-06-03 09:00:00	Tanker
538004110	6850.62	11.3	25.8534	-77.1533	323.994	919	2019-11-02 00:57:29	Cargo			636017074	6039.2	12.2	25.7537	-77.0884	156.054	347	2020-06-03 10:13:24	Cargo
210057000	1208.82	17.6	25.7925	-77.1131	180.931	17504	2019-11-14 12:33:43	Cargo			356449000	3290.59	5.2	25.7759	-77.1007	158.107	1180	2020-06-23 00:02:06	Special Craft
311734000	1912.86	9.6	25.7873	-77.1197	200.615	5599	2019-11-19 10:20:41	Passenger			311478000	3059.34	13.2	25.7758	-77.114	181.991	356	2020-06-24 04:54:28	Passenger
366846000	2203.03	12.3	25.7837	-77.1108	174.457	1265	2019-11-01 06:50:00	Tanker			564977000	5598.54	11.9	25.7529	-77.1134	180.508	1149	2020-06-03 15:41:14	Tanker
357370000	245558	12.6	28.0087	-77.3584	354.387	9	2019-11-01 05:31:00	Cargo			636017711	4628.12	18.4	25.7637	-77.1273	198.041	1944	2020-06-30 13:57:12	Tanker
566689000	6579.32	11.9	25.7442	-77.1078	175.519	1196	2019-11-01 04:56:00	Cargo			311000512	5592.6	11.9	25.7531	-77.1165	183.62	1302	2020-06-03 15:40:25	Cargo
374258000	1336.78	10.9	25.7922	-77.1081	158.776	1371	2019-11-01 12:49:00	Cargo			228333700	4652.63	7.3	25.8046	-77.0666	88.3619	3477	2020-06-04 05:48:28	Tanker
566123000	7901.68	11.9	25.7366	-77.1404	200.288	1363	2019-11-01 13:46:00	Tanker			377901110	4384.79	16	25.7639	-77.1117	178.377	2194	2020-06-06 18:51:28	Cargo
566123000	7901.68	11.9	25.7366	-77.1404	200.288	1363	2019-11-01 13:46:00	Tanker			257246000	5515.56	7.6	25.7608	-77.0846	149.142	318	2020-06-04 05:25:58	Tanker
308371000	1966.94	12.7	25.7858	-77.1152	186.573	1382	2019-11-05 19:45:14	Tanker			311000137	2665.43	15.6	25.7815	-77.102	155.721	1399	2020-06-04 05:51:24	Cargo
376609000	7473.02	19.4	25.744	-77.0778	152.005	271	2019-11-28 06:40:49	Cargo			212460000	2664.2	15.6	25.7812	-77.1029	157.777	1201	2020-06-04 05:51:12	Cargo
636015594	9797.53	11.3	25.7228	-77.0729	155.933	1127	2019-11-01 15:08:00	Cargo			354543000	9014.51	11.6	25.7592	-77.1884	236.955	132	2020-06-18 03:07:52	Cargo
577349000	1542.91	6.3	25.809	-77.127	293.767	2479	2019-11-20 04:09:14	Passenger			354711000	10711.7	13.2	25.7107	-77.1431	196.327	1502	2020-06-18 04:52:19	Cargo
373497000	3993.84	6.9	25.7678	-77.1066	170.93	1310	2019-11-02 03:46:20	Cargo			538008692	4521.17	12.3	25.7643	-77.1255	196.094	953	2020-06-04 11:11:40	Tanker
241299000	1143.65	10.8	25.7932	-77.1117	173.608	1635	2019-11-01 20:41:00	Cargo			636092896	2078.05	15.1	25.8044	-77.1336	272.821	1317	2020-06-04 12:00:40	Cargo
371163000	2298.05	9.5	25.8232	-77.1198	342.637	3116	2019-11-02 04:01:00	Cargo			236662000	2548.23	13.7	25.7805	-77.1118	177.435	1845	2020-06-04 18:25:27	Tanker
355068000	3045.97	13.5	25.7915	-77.1403	244.211	1201	2019-11-29 10:10:42	Special Craft			636017596	2285.18	13.5	25.7829	-77.1109	174.963	883	2020-06-08 13:51:21	Tanker
538006603	3389.52	10.3	25.7755	-77.0993	156.241	1943	2019-11-01 08:17:00	Cargo			538007832	1468.95	15.1	25.8047	-77.1275	275.609	1460	2020-06-04 12:01:59	Tanker
356436000	3474.86	12.6	25.779	-77.0912	141.32	4891	2019-11-10 05:46:18	Special Craft			373721000	3306.04	13	25.7793	-77.0936	144.114	79	2020-06-04 11:56:31	Cargo
373022000	194.466	16.3	25.8038	-77.111	79.9398	11459	2019-11-17 02:33:59	Special Craft			249783000	33760.7	11.3	25.7216	-77.4371	254.403	3	2020-06-04 11:24:33	Cargo
308865000	417.91	8	25.8064	-77.1155	321.721	24427	2019-11-25 03:54:32	Passenger			311427000	1010.77	10.4	25.7952	-77.1087	155.159	766	2020-06-24 19:39:22	Passenger
367523340	8633.94	15.2	25.7256	-77.1167	182.467	973	2019-11-10 08:56:14	Tug			636015052	3000.81	13	25.7795	-77.0989	152.098	1234	2020-06-04 11:57:52	Tanker
373959000	512.11	15.7	25.8003	-77.1092	132.465	3611	2019-11-21 01:40:51	Cargo			255805558	5025.45	12.4	25.7691	-77.1457	220.722	1580	2020-06-04 11:17:10	Cargo
312882000	662.524	14.7	25.7986	-77.1091	144.505	3199	2019-11-09 15:00:22	Tanker			232004993	2631.96	13.6	25.7804	-77.1195	194.321	864	2020-06-04 18:27:16	NA
312283000	1538.97	9.4	25.7907	-77.1067	156.176	7712	2019-11-07 11:03:41	Tanker			636017983	2124.33	15.1	25.8043	-77.1341	272.684	833	2020-06-04 12:00:34	Cargo
538090308	12238.4	18.2	25.7282	-77.2023	226.955	25	2019-11-03 06:32:22	Tanker			636016436	2773.93	13.1	25.7797	-77.1043	161.942	592	2020-06-04 11:59:12	Cargo
367004430	3870.65	15	25.7901	-77.0773	112.501	1708	2019-11-07 23:11:22	Tug			538006808	9191.21	15.3	25.7243	-77.1406	197.459	1155	2020-06-04 22:02:02	Tanker
636018722	8428.01	12.4	25.7274	-77.1153	181.622	1233	2019-11-06 10:11:00	Tanker			538071151	2546.04	13.7	25.7805	-77.1125	179.005	1015	2020-06-04 18:25:38	Pleasure Craft
538004561	132904	0.6	26.3133	-78.3152	295.536	3	2019-11-01 06:18:00	NA			229406000	366.149	14.5	25.8003	-77.1119	163.649	6985	2020-06-26 05:50:04	Tanker
636091784	183824	0.1	26.5243	-78.769	296.237	1	2019-11-01 06:17:00	Cargo			538008583	13096.1	12.3	25.7141	-77.0275	139.235	987	2020-06-04 23:20:46	Tanker
311000619	1618.43	16	25.7898	-77.1071	158.813	766	2019-11-29 01:32:59	Tug			373959000	362.723	14.5	25.8002	-77.1133	186.162	4149	2020-06-26 05:50:23	Cargo
341295000	507.299	18.3	25.7996	-77.1157	212.637	4353	2019-11-28 13:14:37	Cargo			235060303	7090.24	15.1	25.741	-77.1285	192.635	1758	2020-06-05 04:00:04	Tanker
367643740	2208.03	13.3	25.7843	-77.119	195.888	1793	2019-11-29 10:05:11	Special Craft			304941000	4597.19	11.1	25.7665	-77.1339	207.021	3114	2020-06-05 08:48:18	Cargo
636018106	3467.4	20.4	25.7722	-77.1137	181.19	1256	2019-11-02 18:31:42	Cargo			477201100	4830.66	18.3	25.7634	-77.1319	203.051	1079	2020-06-05 10:24:10	Tanker
311427000	1419.76	11.4	25.7909	-77.1101	168.27	4341	2019-11-27 13:56:57	Passenger			241243000	3192.55	9.1	25.776	-77.1226	197.667	1992	2020-06-26 17:25:58	Tanker
356449000	514	11.8	25.8077	-77.115	336.879	3148	2019-11-09 07:00:51	Special Craft			374375000	4784.69	18.3	25.7619	-77.1258	195.578	1454	2020-06-05 10:25:17	Tanker
314096000	2463.57	17.8	25.7822	-77.1057	163.006	6646	2019-11-03 09:27:22	Pleasure Craft			304906000	4283.95	15	25.7661	-77.1239	194.78	2402	2020-06-19 10:59:58	Cargo
249667000	3471.1	12.7	25.7806	-77.0893	137.008	3018	2019-11-10 05:45:39	Passenger			353735000	5871.65	13.6	25.7513	-77.1024	169.644	456	2020-06-17 09:31:21	Special Craft
538006838	2289.01	9.4	25.8237	-77.1175	348.674	1353	2019-11-02 04:00:12	Tanker			538006059	9011.55	13.2	25.7589	-77.1881	236.688	841	2020-06-05 17:53:55	Cargo
245968000	1565.03	6.7	25.8077	-77.1278	287.658	4787	2019-11-20 04:08:23	Passenger			538007786	5215.57	8.8	25.8408	-77.1445	322.755	1604	2020-06-05 13:48:08	Tanker
367390470	1491.08	17.5	25.7901	-77.1107	171.317	1701	2019-11-24 12:31:45	Other			538008330	5488.73	13.1	25.7547	-77.1225	190.024	1375	2020-06-05 17:37:46	Tanker
353479000	88.5272	16.4	25.8029	-77.1123	128.428	7781	2019-11-17 02:33:41	Passenger			538002276	5518.34	13.3	25.755	-77.1258	193.473	1230	2020-06-05 17:38:35	Tanker
371900000	2293.9	9.6	25.8233	-77.1194	343.604	336	2019-11-02 04:00:52	Cargo			352335000	5261.34	8.6	25.8416	-77.1442	323.606	1826	2020-06-05 13:48:30	Cargo
636014220	5979.39	19.2	25.75	-77.1213	188.056	35	2019-11-02 05:15:10	Cargo			636016478	6232.54	9.3	25.748	-77.1026	170.498	769	2020-06-06 00:23:23	Cargo
538071125	14958.9	19.9	25.723	-76.9932	126.678	152	2019-11-02 05:37:03	Passenger			371923000	4097.6	12.1	25.7678	-77.102	164.481	1315	2020-06-17 14:57:19	Special Craft
369970517	15108.7	8.8	25.8503	-77.2545	290.227	233	2019-11-02 07:05:35	Special Craft			210950000	5595.66	12	25.7598	-77.141	210.034	11	2020-06-08 12:18:58	Cargo
377901110	1213.87	17.6	25.7926	-77.1116	173.695	10684	2019-11-14 12:33:25	Cargo			636017972	3389.46	12.1	25.7728	-77.113	180.068	1424	2020-06-06 08:57:35	NA
255806070	11255.4	8.8	25.8341	-77.22	287.669	3	2019-11-02 07:19:56	Cargo			564822000	7045.26	12	25.7728	-77.1745	241.056	1153	2020-06-06 09:14:05	Cargo
371083000	622.662	18.4	25.7995	-77.1174	225.194	21114	2019-11-28 13:14:55	Passenger			636014865	1560.3	9.1	25.8172	-77.1165	346.749	1483	2020-06-06 17:35:52	Cargo
311493000	1427.53	10.9	25.7982	-77.1	114.271	2979	2019-11-20 07:47:28	Passenger			636016691	3391.95	12.1	25.7728	-77.1136	181.107	2087	2020-06-06 08:57:45	Tanker
355263000	293.135	10.6	25.8061	-77.1129	1.55325	18756	2019-11-04 00:35:09	Passenger			310549000	6432.39	12.2	25.7551	-77.0774	146.478	831	2020-06-08 00:41:35	Tanker
311042900	545.359	15.8	25.8008	-77.1083	122.181	28213	2019-11-21 01:41:03	Passenger			370375000	831.939	11.1	25.8104	-77.1161	337.954	7467	2020-06-27 19:13:33	Cargo
303210000	3648.36	12.8	25.787	-77.1445	239.981	2175	2019-11-02 11:08:53	Cargo			370500000	1561.71	9.1	25.8172	-77.1164	347.424	919	2020-06-06 17:35:48	Tanker
636014352	6853.2	16.1	25.7425	-77.1248	189.953	1038	2019-11-02 09:56:49	Tanker			563213000	1587.18	9	25.8165	-77.1194	336.153	1	2020-06-06 17:36:56	Tanker
311000520	1920.39	11.7	25.81	-77.0952	67.6138	4333	2019-11-27 07:58:32	Tanker			538008046	4396.19	16	25.764	-77.1087	174.411	914	2020-06-06 18:50:51	Tanker
371003000	2122.84	21.2	25.7855	-77.1203	200.143	3239	2019-11-22 13:01:46	Special Craft			477023400	4385.36	16	25.7639	-77.1126	179.549	824	2020-06-06 18:51:39	Cargo
215018000	43891.8	10.1	25.8809	-77.5423	281.425	2	2019-11-02 11:48:13	Tanker			255805866	9900.5	10.8	25.7154	-77.0963	170.331	1180	2020-06-06 21:47:17	Cargo
366917720	5285.62	9.8	25.7561	-77.1067	173.268	282	2019-11-30 14:32:31	Tug			377901123	9483.75	11.5	25.7395	-77.1758	221.568	2758	2020-06-20 17:51:08	Cargo
319013100	5777.12	10	25.7559	-77.0894	155.948	189	2019-11-02 14:32:33	Pleasure Craft			566813000	6754.96	12.6	25.764	-77.1643	229.568	1406	2020-06-06 22:38:42	Tanker
236271000	6626.51	20.5	25.7764	-77.1718	242.953	382	2019-11-02 18:22:30	Tanker			244868000	1965.28	12.7	25.7883	-77.1028	148.964	3649	2020-06-07 00:04:24	Cargo
311000396	2370.51	13.4	25.807	-77.1362	279.711	4284	2019-11-11 16:23:15	Passenger			564399000	2330.05	12.7	25.7849	-77.1239	207.933	1778	2020-06-06 23:58:54	Cargo
370491000	341.374	0.7	25.801	-77.115	216.258	8576	2019-11-23 01:57:45	Passenger			255806168	4462.4	15.7	25.7668	-77.1314	204.431	1000	2020-06-07 11:40:17	Cargo
311263000	6712.5	9	25.8511	-77.1543	322.06	1338	2019-11-03 01:44:30	Passenger			538006430	4616.47	15.6	25.7668	-77.1349	208.353	1026	2020-06-07 11:41:00	Cargo
636092413	2517.34	17.8	25.7809	-77.1099	173.035	2690	2019-11-03 09:28:10	NA			432930000	1604.31	8.7	25.8135	-77.1245	314.088	4070	2020-06-20 09:50:37	Cargo
477759800	2723.76	11	25.7789	-77.1117	177.461	1360	2019-11-03 06:47:24	NA			563089400	6915.28	10.9	25.7412	-77.1082	176.1	556	2020-06-07 14:36:46	Tanker
308045000	560.89	8.1	25.8017	-77.1182	249.94	13265	2019-11-25 03:52:12	Passenger			477527900	6624.52	13.9	25.752	-77.1466	210.476	874	2020-06-07 20:55:47	Cargo
246648000	564.844	9.4	25.8044	-77.1185	280.529	7256	2019-11-23 05:15:14	Passenger			377907000	1734.02	9.5	25.8182	-77.1073	19.0072	2253	2020-06-14 05:05:19	Cargo
370039000	2709.3	11.6	25.7819	-77.1002	151.897	3119	2019-11-17 08:23:40	Passenger			563868000	6281.88	12.3	25.7484	-77.128	193.878	984	2020-06-08 00:01:51	Tanker
319409000	15375.3	12.7	25.7481	-77.2535	246.435	22	2019-11-03 04:53:21	Cargo			538007216	5749.71	12.2	25.7534	-77.128	195.177	806	2020-06-08 00:14:59	Tanker
566970000	47116.2	19	25.8367	-77.5814	274.609	2	2019-11-03 05:23:04	Cargo			538006780	5761.56	12.2	25.7548	-77.1331	200.46	798	2020-06-08 00:16:28	Cargo
357988000	1821.83	12.7	25.7875	-77.1083	165.424	2220	2019-11-05 19:47:04	Cargo			248964000	13423.3	12.5	25.7831	-77.2449	260.33	17	2020-06-08 00:47:08	Tanker
355831000	690.407	13.2	25.8096	-77.1143	349.101	5283	2019-11-08 11:04:45	Passenger			636019085	2496.59	12.7	25.7914	-77.0919	122.346	1219	2020-06-08 08:55:51	Cargo
538004164	2457.38	17.7	25.7831	-77.1032	156.622	2794	2019-11-03 09:26:52	Tanker			219361000	20740.2	12.9	25.8036	-77.3198	270.083	16	2020-06-08 01:07:09	Cargo
477181700	2456.36	17.7	25.7829	-77.1037	157.893	1452	2019-11-03 09:26:58	Cargo			636014107	20797.4	12.9	25.8037	-77.3203	270.131	344	2020-06-08 01:07:18	Tanker
371458000	2498.35	17.8	25.7812	-77.1088	170.569	1098	2019-11-03 09:27:58	Tanker			257695000	1518.31	9.5	25.8044	-77.0978	85.9581	2155	2020-06-17 05:42:15	Tanker
636018259	2463.8	17.7	25.7837	-77.1017	152.792	1898	2019-11-03 09:26:34	NA			374249000	31689.8	11.7	25.8864	-76.8104	72.9995	957	2020-06-08 02:05:24	Cargo
377908000	2458.05	17.8	25.7827	-77.1042	159.182	89	2019-11-03 09:27:04	Cargo			636014194	14115.6	15	25.8209	-77.2524	277.966	901	2020-06-08 03:24:40	Tanker
241275000	2748.93	12.2	25.7797	-77.1209	196.868	1360	2019-11-03 12:01:07	Tanker			538003016	1050.27	15.6	25.7944	-77.1099	163.203	1160	2020-06-08 03:55:10	Cargo
352306000	1927.9	16.4	25.7861	-77.114	182.987	1952	2019-11-30 22:14:13	Special Craft			248531000	1010.28	15.6	25.7945	-77.1147	189.915	989	2020-06-08 03:54:10	Tanker
367125330	4649.62	11.9	25.7713	-77.0831	140.033	1257	2019-11-03 12:11:36	Tug			538007810	1003.54	15.6	25.7944	-77.1133	182.204	1572	2020-06-08 03:54:28	Tanker
636015834	3582.23	10.7	25.8354	-77.1072	9.22958	1517	2019-11-03 19:52:49	Tanker			375939000	1011.29	15.6	25.7944	-77.1118	173.64	4245	2020-06-08 03:54:46	Cargo
311000616	1755.15	15.9	25.804	-77.0954	88.1596	1057	2019-11-29 01:36:59	Tug			255805611	1031.6	15.7	25.7946	-77.1161	197.929	1901	2020-06-08 03:53:52	Cargo
636091346	5323.54	18.6	25.7555	-77.1165	183.823	1531	2019-11-03 19:42:45	Cargo			636018189	4916.02	14.2	25.7655	-77.0875	148.817	88	2020-06-08 06:35:37	Cargo
372089000	8209.98	19.1	25.7533	-77.1732	227.298	143	2019-11-04 13:26:45	Special Craft			538071125	2184.42	12.4	25.7838	-77.115	185.325	709	2020-06-08 09:02:11	Passenger
368926303	5338.85	18.6	25.7553	-77.116	183.275	192	2019-11-03 19:42:50	Special Craft			244584000	2135.14	12.5	25.7842	-77.1138	182.214	530	2020-06-08 09:01:51	Cargo
477021500	2232.98	10	25.823	-77.1075	13.9717	1137	2019-11-04 00:28:58	Tanker			220129000	23440.4	14.6	25.7876	-77.346	265.737	8	2020-06-08 07:35:13	Cargo
247289800	3691.58	10.3	25.8357	-77.1036	14.5851	1871	2019-11-04 00:24:19	Cargo			477318300	5352.39	12	25.7597	-77.1355	204.895	956	2020-06-08 12:17:29	Cargo
354543000	7634.05	13.5	25.7371	-77.1334	195.479	538	2019-11-03 22:09:00	Cargo			244010871	2308	13.5	25.7833	-77.1069	164.849	890	2020-06-08 13:52:21	Cargo
353735000	1369.87	12.5	25.7922	-77.1072	155.485	1997	2019-11-11 09:12:03	Special Craft			355673000	2368.72	13.6	25.7827	-77.1186	193.737	829	2020-06-08 13:49:31	Cargo
370375000	4946	13.4	25.7632	-77.1343	205.584	1899	2019-11-20 08:50:58	Cargo			311058700	2404.23	13.7	25.7829	-77.1207	198.698	3045	2020-06-08 13:49:01	Passenger
538006540	1349.64	10.2	25.7919	-77.1174	199.102	884	2019-11-04 00:40:18	NA			566831000	2285.82	13.4	25.7829	-77.1103	173.405	1251	2020-06-08 13:51:31	Cargo
636018330	935.78	10.2	25.7955	-77.1162	200.306	1057	2019-11-04 00:38:59	Cargo			249892000	5072.92	10.4	25.7656	-77.0845	145.892	701	2020-06-08 19:33:36	Cargo
352812000	3742.86	13.9	25.7699	-77.1087	173.493	218	2019-11-04 00:59:13	Cargo			563096500	5170.87	11.9	25.7586	-77.0987	164.057	11	2020-06-08 12:07:29	Cargo
255805832	3992.75	13.2	25.7686	-77.1232	194.93	2809	2019-11-04 05:54:08	NA			255805914	3455.66	10.5	25.7731	-77.1052	167.014	77	2020-06-08 19:40:36	Cargo
351468000	34.5189	16.3	25.8038	-77.1129	5.74903	7357	2019-11-22 00:03:55	Special Craft			577403000	849.688	11.1	25.8111	-77.114	352.986	5877	2020-06-27 19:14:12	Cargo
311050800	3140	19	25.777	-77.1244	201.264	4853	2019-11-24 19:59:06	Passenger			477462400	39201.4	13.5	25.8459	-77.5011	277.009	1	2020-06-08 12:16:31	Cargo
375902000	739.515	13.5	25.8086	-77.1176	321.209	4945	2019-11-08 11:05:37	Cargo			250002903	8203.72	12.6	25.7303	-77.126	189.155	774	2020-06-12 12:57:30	Cargo
305007000	1446.41	10.4	25.801	-77.0988	100.773	2497	2019-11-20 07:46:28	Cargo			244117000	22650.9	7.8	25.8439	-77.3344	281.525	23	2020-06-08 15:00:13	Cargo
636013289	3993.88	13.3	25.7685	-77.1226	193.939	2743	2019-11-04 05:53:58	Cargo			214182626	33268.6	9.5	25.8831	-77.4329	285.524	24	2020-06-08 15:39:01	Cargo
354342000	5591.58	19.9	25.7534	-77.1202	187.424	1368	2019-11-04 06:36:26	NA			229857000	1827.88	10.6	25.7876	-77.1079	164.1	1922	2020-06-24 20:57:05	Passenger
311020700	1335.23	12.5	25.7914	-77.1117	174.514	4398	2019-11-11 09:13:13	Passenger			538005657	6564.56	10.5	25.799	-77.1782	265.721	1	2020-06-08 20:04:56	Cargo
308017000	552.456	11.8	25.8084	-77.1126	3.3084	11330	2019-11-09 07:00:11	Passenger			215466000	4661.01	16.6	25.7614	-77.1145	181.873	1283	2020-06-09 16:49:06	Tanker
518630000	3617.18	13.6	25.7718	-77.1039	165.5	772	2019-11-20 08:43:28	Cargo			244790608	4660.54	16.6	25.7614	-77.114	181.252	971	2020-06-09 16:49:12	Cargo
367503380	15874.1	20.9	25.7354	-77.2522	241.562	15	2019-11-04 07:20:52	Pleasure Craft			319353000	4661.69	16.6	25.7614	-77.1149	182.394	644	2020-06-09 16:49:01	Sailing Vessel
311315000	493.075	15.8	25.7995	-77.1107	152.548	4086	2019-11-21 01:40:28	Passenger			636017725	10901.1	12	25.7604	-77.2107	243.976	167	2020-06-09 18:40:06	Cargo
366887190	5120.81	10.3	25.8293	-77.1553	304.213	1564	2019-11-04 12:17:27	Tug			354405000	27601.8	14	25.7266	-77.3747	251.99	9	2020-06-09 19:45:44	Cargo
377909000	2831.57	16.1	25.8167	-77.0888	58.4862	794	2019-11-29 01:40:11	Cargo			636012660	31643.8	14.2	25.7548	-77.4238	260.203	18	2020-06-09 19:32:25	Tanker
353775000	5118.97	10.1	25.8289	-77.1555	303.629	1709	2019-11-04 12:17:17	Cargo			366230000	25363.5	13.9	25.7089	-77.3432	245.546	30	2020-06-09 19:54:21	Cargo
338640000	1271.94	17.8	25.7927	-77.1084	158.985	2754	2019-11-14 12:32:49	Cargo			241145000	6329.97	10.9	25.762	-77.1564	223.331	143	2020-06-10 01:41:14	Cargo
352829000	5572.56	13.5	25.7531	-77.1126	179.675	1469	2019-11-04 17:25:00	Cargo			353486000	4654.14	13.6	25.8188	-77.0697	68.5191	762	2020-06-10 08:44:43	NA
312407000	5819.61	13.4	25.7534	-77.0953	162.431	1026	2019-11-04 17:20:50	Tanker			255805922	13330.9	5.3	25.6834	-77.104	176.174	197	2020-06-30 22:45:15	Cargo
374614000	3522.94	11.9	25.7717	-77.1139	181.534	1904	2019-11-04 22:16:45	Tanker			255806164	53122.4	12.5	25.9047	-77.6309	282.369	1	2020-06-09 22:42:31	Cargo
374219000	3416.84	11.9	25.7736	-77.1217	194.825	1570	2019-11-04 22:18:55	Tanker			224444000	4746.11	8.1	25.7735	-77.0791	134.447	991	2020-06-10 05:12:26	Tanker
377901104	438.515	11.5	25.8074	-77.1131	358.388	10817	2019-11-20 16:55:25	Cargo			477900300	1917.81	13.8	25.791	-77.0996	136.101	1392	2020-06-10 08:54:54	Cargo
248602000	4357.2	14.9	25.7644	-77.1077	173.15	1671	2019-11-05 02:13:45	Tanker			218158000	3694.36	12.5	25.7888	-77.1461	243.878	1888	2020-06-10 02:27:11	Cargo
538007014	4408.52	14.6	25.7654	-77.1	163.02	728	2019-11-05 02:15:27	NA			538006488	5002.71	14	25.7603	-77.1278	197.247	1467	2020-06-26 22:43:36	Tanker
377913000	318.084	7.8	25.8025	-77.1159	250.156	5634	2019-11-05 05:23:59	Cargo			563099300	5052.67	10.7	25.7582	-77.1194	187.361	646	2020-06-10 01:30:02	Tanker
538006645	499.724	8.6	25.8002	-77.1165	224.657	437	2019-11-05 05:22:59	Tanker			311208000	11014.8	16.2	25.7326	-77.0359	135.573	906	2020-06-10 06:49:20	Cargo
312794000	2005.74	9.3	25.7854	-77.1137	182.029	1417	2019-11-19 10:22:52	Tanker			566646000	1960.77	13.9	25.7887	-77.1021	146.318	1257	2020-06-10 08:55:43	Cargo
403589000	4855.4	16.6	25.7597	-77.1111	177.81	1229	2019-11-05 10:06:52	Tanker			538005855	5271.15	12.2	25.759	-77.1317	200.776	932	2020-06-11 00:43:14	Cargo
247255400	9399.69	16.4	25.7753	-77.0245	109.428	1101	2019-11-05 09:49:23	Passenger			636016464	2574.04	10.2	25.816	-77.0913	57.1353	1193	2020-06-11 03:06:29	Tanker
309697000	720.93	8.3	25.7997	-77.1188	234.324	10236	2019-11-14 04:13:41	Passenger			377901119	4960.65	16.8	25.759	-77.1187	186.592	5300	2020-06-26 16:06:50	Cargo
357069000	50745.7	15.2	25.7712	-77.6176	266.057	2	2019-11-05 08:35:53	Cargo			220187000	865.47	7	25.8079	-77.1201	304.634	1567	2020-06-11 12:40:22	Cargo
563066900	4815.6	18.7	25.7749	-77.0767	131.165	1290	2019-11-05 11:33:47	Cargo			636092708	26417.3	13.2	25.7749	-77.3744	263.138	41	2020-06-10 20:11:36	Cargo
312785000	2879.12	11.5	25.7775	-77.1115	177.038	616	2019-11-17 08:27:09	Tanker			356579000	3604.47	10	25.8265	-77.0876	44.775	2050	2020-06-11 03:10:19	Cargo
257160000	3322.37	11.4	25.7739	-77.1184	189.467	1450	2019-11-05 14:28:00	Cargo			538006871	5103.38	12.2	25.7577	-77.1193	187.121	367	2020-06-11 00:46:34	Cargo
564011000	3337.52	11.5	25.7745	-77.1223	196.321	3184	2019-11-05 14:26:51	Tanker			241586000	5418.18	12.7	25.7557	-77.1246	192.381	845	2020-06-11 08:01:14	Tanker
311050900	4260.05	10.4	25.7703	-77.0913	149.532	1030	2019-11-05 13:01:31	Passenger			341295000	1192.43	10.4	25.7927	-77.1139	184.608	1304	2020-06-24 19:41:13	Cargo
249545000	3321.92	11.4	25.774	-77.1189	190.375	991	2019-11-05 14:27:51	Tanker			636016437	6360.3	13	25.7588	-77.1529	218.859	379	2020-06-11 07:54:04	Cargo
255805671	2266.11	16.6	25.787	-77.0995	143.601	1657	2019-11-05 20:33:21	Cargo			431156000	4317.38	7.4	25.7733	-77.1402	219.143	692	2020-06-11 12:20:42	Tanker
253218000	3322.28	11.4	25.7741	-77.1196	191.487	1653	2019-11-05 14:27:40	Tanker			538003115	1511.93	7.3	25.7981	-77.1268	247.047	298	2020-06-11 12:34:31	Tanker
311000274	501.125	15.8	25.8002	-77.1095	136.603	15278	2019-11-21 01:40:45	Passenger			636091619	2625.02	6.8	25.8266	-77.1075	11.9767	571	2020-06-11 12:52:11	Cargo
538006974	6070.83	16.7	25.7498	-77.1251	191.529	2963	2019-11-15 22:13:39	Tanker			477848500	5283.73	15.4	25.7672	-77.1472	220.455	870	2020-06-11 15:01:43	Cargo
636012069	8610	12.3	25.7442	-77.0574	139.846	962	2019-11-05 15:39:53	Tanker			366846000	3880.09	16.4	25.7698	-77.1238	196.204	810	2020-06-11 17:20:33	Tanker
249080000	8896.49	10.4	25.7377	-77.1638	214.862	1197	2019-11-05 16:51:36	Tanker			373383000	24128.9	17.5	25.8229	-77.3526	275.216	16	2020-06-11 16:34:51	Cargo
636017983	8173.96	16.7	25.7739	-77.1876	246.31	1072	2019-11-05 20:14:21	Cargo			355981000	4895.86	18	25.7604	-77.1239	192.924	2109	2020-06-21 21:34:45	Cargo
249227000	1828.02	12.7	25.7872	-77.1095	169.317	1303	2019-11-05 19:46:44	Cargo			371900000	20051.6	14.5	25.8087	-77.3128	271.705	123	2020-06-20 14:38:51	Cargo
372804000	1829.49	12.7	25.788	-77.1064	159.067	4628	2019-11-05 19:47:34	Cargo			259917000	5454.47	6.9	25.8452	-77.1418	328.157	1086	2020-06-12 04:02:07	Cargo
319821000	721.241	9.2	25.8094	-77.1158	336.608	14325	2019-11-08 05:44:50	Pleasure Craft			209862000	4662.57	15.3	25.7633	-77.1269	197.446	2585	2020-06-26 02:40:47	Cargo
367768540	830.19	12.9	25.7974	-77.1081	144.484	4430	2019-11-09 02:53:47	Pleasure Craft			636091731	1732.99	19	25.7878	-77.1137	182.591	2355	2020-06-12 09:53:28	Cargo
566306000	3409.39	11.2	25.7727	-77.1115	177.633	907	2019-11-05 21:13:43	Tanker			219241000	21885.2	15	25.7591	-77.3256	257.006	1	2020-06-12 09:50:36	Tanker
246506000	258.484	9.7	25.8029	-77.1154	256.337	5950	2019-11-13 07:28:57	NA			305276000	8202.79	12.6	25.7302	-77.1247	188.244	587	2020-06-12 12:57:10	Cargo
255805889	4402.42	19.1	25.7656	-77.1262	197.434	1437	2019-11-06 01:02:00	Cargo			319904000	1889.44	16.1	25.7864	-77.1135	181.594	4098	2020-06-14 14:36:32	Cargo
308516000	179.78	16.4	25.8026	-77.1145	239.512	12734	2019-11-22 00:03:31	Passenger			314428000	6956.51	16.2	25.7414	-77.1239	189.003	1099	2020-06-12 21:27:16	Cargo
377901111	767.391	13.1	25.8103	-77.1117	9.03383	5943	2019-11-08 11:04:06	Cargo			636017659	6956.06	16.2	25.7413	-77.1228	188.172	521	2020-06-12 21:27:29	Cargo
369326000	9240.85	19	25.7804	-77.2015	253.921	1536	2019-11-06 01:15:00	Cargo			371059000	6957.46	16.2	25.7415	-77.1243	189.335	1428	2020-06-12 21:27:11	Cargo
218355000	5618.84	16.7	25.7527	-77.112	179.057	1094	2019-11-06 19:48:00	Cargo			518630000	6667.59	13.7	25.7528	-77.0771	147.499	113	2020-06-27 18:25:50	Cargo
563080100	5653.88	16.6	25.7529	-77.1053	172.286	4063	2019-11-06 19:46:00	Tanker			563069500	10440.6	10	25.8167	-77.216	278.147	1093	2020-06-13 08:09:48	Tanker
563056900	9394.84	16.3	25.7229	-77.1421	198.075	1880	2019-11-06 03:54:00	Tanker			636015946	11060.4	15.5	25.704	-77.1223	184.836	1383	2020-06-13 05:12:27	Tanker
538005626	21766.7	16.3	25.8061	-76.8959	89.1836	883	2019-11-06 19:04:00	NA			563079700	4000.13	10.3	25.8215	-77.1475	300.185	920	2020-06-13 08:33:31	Tanker
235849000	3815.05	11.5	25.7865	-77.1461	240.4	1546	2019-11-06 12:53:00	Tanker			229853000	1477.54	11.6	25.803	-77.1277	267.893	1729	2020-06-18 04:31:26	Tanker
636016433	4710.48	14.1	25.7629	-77.1269	197.263	1432	2019-11-06 19:05:00	Cargo			566342000	2787.03	15.1	25.7785	-77.1096	173.106	1175	2020-06-13 09:45:18	Cargo
563029700	4093.67	8.2	25.7944	-77.1525	255.715	2770	2019-11-23 23:01:52	Cargo			319079100	3967.53	10.5	25.8241	-77.1453	305.399	476	2020-06-13 08:34:39	Tanker
636016432	12694.8	13.1	25.7284	-77.2086	228.977	702	2019-11-06 11:45:00	Cargo			255806077	2788.93	15.1	25.7788	-77.1072	168.199	1253	2020-06-13 09:45:48	Cargo
311000504	6929.52	13.2	25.7426	-77.097	166.746	750	2019-11-06 11:18:00	Tanker			367447850	17790.7	8.2	25.7569	-77.2827	253.101	116	2020-06-13 18:49:09	Pleasure Craft
477162800	7382.22	13.1	25.7384	-77.1288	192.357	997	2019-11-06 11:25:00	Cargo			319074000	34092.2	8.5	25.7944	-77.4527	268.377	6	2020-06-13 17:42:19	Pleasure Craft
371005000	2841.39	11.6	25.7779	-77.111	176.065	1130	2019-11-06 12:43:00	Tanker			235108619	3768.41	20.2	25.7695	-77.115	183.16	1299	2020-06-14 05:50:03	Tanker
354580000	2165.96	11.3	25.7931	-77.0946	122.083	2114	2019-11-27 14:01:27	Special Craft			311000223	20528.8	11.8	25.7486	-76.9174	107.255	805	2020-06-14 11:02:57	Tanker
338724000	1116.69	6.2	25.8071	-77.1026	68.5193	474	2019-11-06 05:05:00	Tug			477027400	9205.88	12.4	25.7216	-77.0968	169.926	1165	2020-06-14 11:52:08	Cargo
636019450	2288.56	8.7	25.8139	-77.0933	59.4867	1801	2019-11-07 05:47:10	Tanker			367343960	3629.04	12	25.7712	-77.1064	169.66	560	2020-06-14 15:53:58	Special Craft
564863000	1617.62	8.5	25.8045	-77.0969	85.7316	673	2019-11-07 05:51:19	Tanker			377911000	9198.62	13.2	25.725	-77.0828	160.918	493	2020-06-14 12:49:12	Cargo
310423000	7379.89	16.9	25.7377	-77.125	189.398	1059	2019-11-07 07:46:24	Passenger			565810000	4227.92	11.9	25.7676	-77.1275	200.172	1378	2020-06-14 15:59:48	Cargo
357659000	3965.03	9.3	25.8089	-77.0739	81.2181	2118	2019-11-07 10:50:01	Passenger			636019358	7831.28	11	25.7334	-77.1028	172.571	959	2020-06-14 18:28:28	Tanker
255805581	240.802	18.1	25.8013	-77.1131	183.967	2617	2019-11-07 12:53:13	Cargo			538007453	7799.09	11	25.7379	-77.0845	158.607	1465	2020-06-14 18:22:48	Cargo
319133200	13942.6	8.7	25.8866	-77.0085	48.4655	12	2019-11-07 10:10:52	Pleasure Craft			419001262	14921.4	10.3	25.7551	-77.2518	248.871	732	2020-06-14 19:15:47	Cargo
246596000	252.721	18.1	25.8013	-77.112	158.214	915	2019-11-07 12:53:01	Cargo			710033180	7598.26	11.2	25.7355	-77.1025	172.109	1915	2020-06-22 08:52:00	Tanker
258251000	732.354	18.1	25.8018	-77.1059	104.798	1509	2019-11-07 12:51:56	Cargo			374026000	5309.5	19.7	25.7574	-77.1275	195.898	1084	2020-06-14 21:55:38	Tanker
565842000	272.779	18.1	25.8012	-77.1141	205.596	1061	2019-11-07 12:53:24	Tanker			241662000	1435.82	10.3	25.815	-77.1064	27.0934	1406	2020-06-15 02:43:02	Tanker
306157000	343.206	18.1	25.8015	-77.1103	130.161	2539	2019-11-07 12:52:43	Cargo			241356000	5130.52	9.6	25.8469	-77.0953	20.0489	105	2020-06-15 02:31:10	Tanker
248939000	6799.4	15.6	25.7435	-77.1277	192.481	1001	2019-11-08 02:40:01	Passenger			636018884	1389.05	10.3	25.8146	-77.1065	27.4031	1638	2020-06-15 02:43:11	Tanker
563000700	274.367	18.1	25.8014	-77.1114	146.986	1393	2019-11-07 12:52:55	Cargo			538006682	250.177	10.3	25.8032	-77.1105	95.5778	800	2020-06-15 02:47:21	Tanker
218582000	637.393	18.1	25.8009	-77.1187	244.142	2234	2019-11-07 12:54:13	NA			258251000	1342.63	10.1	25.8142	-77.1067	27.792	884	2020-06-15 02:43:20	Cargo
538006014	2707.99	17.3	25.779	-77.1141	182.51	1065	2019-11-07 15:16:04	Cargo			255806205	930.928	10	25.8105	-77.1079	32.6145	807	2020-06-15 02:44:40	Cargo
538071166	4895.66	13.8	25.7609	-77.1263	195.821	172	2019-11-07 17:34:09	Pleasure Craft			636092275	4643.5	12	25.763	-77.1006	164.661	1490	2020-06-15 09:27:50	Cargo
232016692	2643.41	15.2	25.781	-77.1041	160.581	633	2019-11-07 23:17:34	Cargo			235079977	4480.71	12	25.7635	-77.1061	171.239	511	2020-06-15 09:29:19	Pleasure Craft
636092901	5457.53	14	25.7546	-77.12	187.426	956	2019-11-07 20:36:17	Cargo			357444000	7616.11	10.9	25.748	-77.1578	216.105	1207	2020-06-15 13:29:32	Cargo
229158000	2698.04	15.1	25.7825	-77.0993	149.623	1030	2019-11-07 23:16:29	Cargo			372089000	9401.67	11.1	25.7301	-77.1602	210.132	491	2020-06-22 09:09:00	Special Craft
374668000	2645.61	15.1	25.7812	-77.1033	158.72	1171	2019-11-07 23:17:23	Cargo			477332000	7626	10.9	25.748	-77.158	216.206	830	2020-06-15 13:29:29	Tanker
354858000	2702.9	15.1	25.7792	-77.1095	172.677	1062	2019-11-07 23:18:47	Cargo			636018568	3235.72	11.3	25.7814	-77.1341	220.844	1711	2020-06-15 22:37:55	Tanker
538090535	2816.29	15.1	25.7781	-77.1144	182.975	1114	2019-11-07 23:19:53	NA			319072900	3636.47	9.8	25.8063	-77.1491	275.045	127	2020-06-15 21:19:00	Pleasure Craft
244203000	4417.11	4.3	25.802	-77.157	267.986	1502	2019-11-08 00:27:14	Cargo			538006109	21563.2	10.3	25.6436	-77.2356	214.692	840	2020-06-16 01:49:49	Cargo
255806063	78.1042	16.2	25.804	-77.1125	33.0459	3143	2019-11-22 00:04:01	Cargo			538002774	4859.91	15.4	25.7631	-77.1321	203.165	539	2020-06-16 05:31:28	Tanker
309168000	3269.39	13.8	25.7739	-77.1124	179.004	5522	2019-11-25 15:43:00	Passenger			319129600	4786.96	15.4	25.7615	-77.1244	193.789	961	2020-06-16 05:29:46	Tanker
241290000	482.204	9.8	25.8033	-77.1178	268.611	1874	2019-11-08 05:42:28	Tanker			310627384	30944.1	15.2	25.8305	-77.4201	275.651	1	2020-06-16 06:34:52	NA
310500000	401.296	18.3	25.7998	-77.1129	178.937	11867	2019-11-28 13:14:06	Passenger			311020600	19958.8	11.9	25.7606	-77.3062	256.225	211	2020-06-27 20:52:05	Passenger
319008900	6255.43	18.8	25.802	-77.1753	268.556	83	2019-11-08 11:58:52	Pleasure Craft			538006976	10086.3	11.7	25.7381	-77.183	224	1757	2020-06-16 07:46:23	Tanker
255806069	689.674	13.3	25.8092	-77.1156	337.22	2761	2019-11-08 11:05:06	Cargo			258795000	9996.88	11.7	25.7378	-77.1813	223.144	787	2020-06-16 07:45:53	Tanker
305134000	716.631	13.1	25.8099	-77.113	359.426	1306	2019-11-08 11:04:26	Cargo			366757430	8512.75	11.7	25.7267	-77.1095	177.703	386	2020-06-16 12:01:53	Sailing Vessel
477913100	1608.67	13.5	25.8054	-77.1288	277.956	1266	2019-11-08 11:08:26	Cargo			377906000	3879.8	14	25.7694	-77.1041	166.85	1625	2020-06-23 19:21:22	Cargo
249981000	2343.74	18.8	25.7825	-77.1162	188.051	2199	2019-11-08 11:48:04	Tanker			370833000	10931.3	11.5	25.7837	-77.2197	258.419	1390	2020-06-16 17:17:37	Tanker
636017711	433.564	16.2	25.8051	-77.109	65.1322	2575	2019-11-17 02:34:29	Tanker			308109000	2441.44	10.9	25.7817	-77.1087	169.935	1103	2020-06-16 17:49:58	Tanker
319763000	6363.18	18.8	25.8024	-77.1764	268.932	7	2019-11-08 11:59:04	Pleasure Craft			338219000	4285.12	10.8	25.7892	-77.0732	111.761	2148	2020-06-16 18:00:48	Cargo
477318400	4375.04	19.5	25.7739	-77.084	138.665	1069	2019-11-08 14:44:03	Cargo			563087200	4618.26	9.3	25.8157	-77.157	287.196	943	2020-06-16 21:50:00	Tanker
565113000	11038.2	13.5	25.7353	-77.1932	226.727	1534	2019-11-08 19:47:16	Tanker			319180300	24437.1	15.7	25.7785	-77.355	263.537	20	2020-06-16 20:19:49	Passenger
564755000	10504.7	13.9	25.7094	-77.1263	187.314	1157	2019-11-08 20:32:02	Cargo			538002657	4618.83	9.3	25.8148	-77.1573	285.942	1156	2020-06-16 21:50:20	Cargo
215189000	10413.5	13.8	25.71	-77.1015	173.691	1013	2019-11-08 20:37:52	Cargo			538008263	1552.61	10	25.7903	-77.1183	200.033	1380	2020-06-16 23:58:01	Tanker
235108527	5672.27	13.4	25.7683	-77.0718	133.504	1121	2019-11-08 22:47:19	Tanker			355442000	2429.71	11.6	25.7909	-77.0931	125.064	1413	2020-06-30 20:05:31	Tanker
237928000	4699.89	13.5	25.7631	-77.1274	197.878	1032	2019-11-08 23:00:58	Tanker			538007961	4394.97	8.7	25.7985	-77.0695	97.1337	793	2020-06-17 04:38:49	Tanker
235108538	4422.41	18	25.7643	-77.1218	191.507	1334	2019-11-09 01:29:16	NA			538006351	8703.82	13.3	25.7509	-77.0484	132.067	1027	2020-06-17 09:18:21	Cargo
255806167	4203.2	12.9	25.8278	-77.0808	49.8374	1410	2019-11-09 02:42:56	Cargo			636019087	3464.47	12.1	25.7736	-77.1233	197.401	1494	2020-06-17 15:03:09	Cargo
249850000	4421.19	18	25.7645	-77.1224	192.35	948	2019-11-09 01:29:22	Cargo			355789000	12357.6	15	25.7001	-77.0667	158.04	1	2020-06-17 14:02:06	Tanker
538002757	819.987	12.9	25.7977	-77.1078	141.475	1018	2019-11-09 02:53:39	Tanker			352957000	3183.77	12	25.7776	-77.099	154.045	1499	2020-06-18 03:34:42	Cargo
538001663	1092.92	13	25.7937	-77.1115	172.432	1598	2019-11-09 02:55:06	Passenger			255806167	3189.97	12	25.7783	-77.0974	150.807	1340	2020-06-18 03:35:11	Cargo
319713000	923.076	12.9	25.8021	-77.1039	99.6878	592	2019-11-09 02:52:06	Pleasure Craft			319077100	10831.4	12	25.8036	-77.221	270.131	442	2020-06-17 15:31:00	Pleasure Craft
305375000	839.901	12.9	25.8007	-77.1051	111.562	1948	2019-11-09 02:52:36	Cargo			563549000	11692.7	11.9	25.8067	-77.2295	271.779	55	2020-06-17 15:33:30	Cargo
636016398	1031.37	12.9	25.7943	-77.1108	168.224	1001	2019-11-09 02:54:53	Tanker			319201000	12596.9	12.6	25.69	-77.1042	176.011	36	2020-06-17 17:22:55	Pleasure Craft
215371000	577.137	11.9	25.8086	-77.1121	8.86174	1412	2019-11-09 07:00:01	Tanker			249078000	1998.06	11.5	25.8016	-77.1328	263.989	1020	2020-06-18 04:29:56	Tanker
477866300	513.197	11.8	25.8079	-77.1144	343.66	1502	2019-11-09 07:00:42	Cargo			636015302	12730.9	12.3	25.7119	-77.1897	217.059	132	2020-06-18 01:52:56	Tanker
338231000	879.423	11.8	25.8058	-77.1213	287.222	657	2019-11-09 07:02:42	Tug			356515000	12811.8	12.3	25.7118	-77.1909	217.468	31	2020-06-18 01:53:14	Cargo
255805801	5429.76	8.8	25.8469	-77.138	332.619	1	2019-11-09 06:18:15	Cargo			338760000	16190.4	11.5	25.7291	-77.2519	239.307	141	2020-06-30 19:32:00	Cargo
244850853	619.819	11.8	25.8068	-77.1179	307.318	2997	2019-11-09 07:01:42	Cargo			636016166	16639.8	12.1	25.7778	-77.2764	260.164	164	2020-06-18 02:43:01	NA
636012318	13805.5	16.2	25.7706	-77.2457	254.659	16	2019-11-09 08:27:58	Tanker			466243000	2401.48	11.5	25.8005	-77.1367	262.168	1107	2020-06-18 04:28:47	Tanker
563033500	4879.2	14	25.7603	-77.1228	191.579	1358	2019-11-09 12:15:27	Cargo			367799380	8526.15	11.6	25.7578	-77.1814	233.52	113	2020-06-18 03:09:52	Cargo
241193000	4955.57	14	25.7587	-77.1139	181.091	1114	2019-11-09 12:13:21	NA			220206000	3187.77	12	25.7771	-77.1002	156.391	1	2020-06-18 03:34:21	Cargo
319137700	9846.3	17.2	25.7487	-77.1903	231.841	1085	2019-11-09 09:48:12	Pleasure Craft			477289300	1202.74	11.3	25.8096	-77.1031	55.1863	1925	2020-06-18 04:38:46	Cargo
311000512	4880.32	13.9	25.7605	-77.1236	192.584	1214	2019-11-09 12:15:39	Cargo			351463000	38757	14.4	25.8212	-77.4989	273.007	1	2020-06-18 07:59:54	NA
377901107	3630.09	7.8	25.8107	-77.1482	282.942	3227	2019-11-23 22:54:32	Cargo			636017518	7240.08	15.9	25.7698	-77.1748	238.842	987	2020-06-18 09:59:01	Cargo
311000599	683.519	14.7	25.7989	-77.1083	137.101	1717	2019-11-09 15:00:35	Passenger			636017519	5081.02	16.1	25.7617	-77.1339	204.37	1152	2020-06-18 10:07:30	Cargo
218841000	892.603	14.8	25.7958	-77.1157	198.01	1661	2019-11-09 14:58:47	NA			319198000	5209.74	16.1	25.7627	-77.1388	209.71	810	2020-06-18 10:06:30	Pleasure Craft
235192000	3904.7	14.7	25.7834	-77.145	235.187	752	2019-11-09 14:51:40	NA			636091400	5112.02	16.1	25.762	-77.1353	205.907	1275	2020-06-18 10:07:13	Cargo
371626000	672.83	14.7	25.7988	-77.1086	140.166	1872	2019-11-09 15:00:29	Cargo			538007405	5702.29	13.7	25.7524	-77.1199	186.993	1073	2020-06-18 21:20:53	Cargo
566900000	655.762	14.7	25.7977	-77.1112	164.379	1064	2019-11-09 14:59:52	Tanker			431228000	5456.46	10.2	25.8467	-77.1391	331.461	1429	2020-06-18 22:26:51	Tanker
241635000	650.112	14.7	25.7981	-77.1103	156.536	1898	2019-11-09 15:00:04	Tanker			636016432	7128.7	14.3	25.7401	-77.1255	190.126	674	2020-06-18 16:31:08	Cargo
357396000	871.685	14.7	25.8003	-77.105	113.527	1189	2019-11-09 15:01:22	Cargo			538006978	5463.6	10.5	25.846	-77.1405	329.8	1338	2020-06-18 22:27:21	Tanker
419001262	2463.88	15.1	25.7825	-77.1047	160.574	1557	2019-11-09 21:18:03	Cargo			636018010	4763	13	25.7859	-77.1563	245.872	2501	2020-06-26 08:19:13	Tanker
229740000	1356.16	12.9	25.7913	-77.1142	185.305	5650	2019-11-29 02:17:41	Tanker			538002662	979.723	13.5	25.7946	-77.1131	181.149	582	2020-06-19 06:08:29	Tanker
244140580	89.3508	16.5	25.8027	-77.1127	160.898	6794	2019-11-17 02:33:35	Passenger			249080000	3506.97	17.1	25.799	-77.0783	98.1509	1448	2020-06-19 06:48:56	Tanker
538008522	6163.72	17.1	25.7497	-77.1289	194.976	1679	2019-11-10 00:19:30	Tanker			229799000	3252.52	17.1	25.7986	-77.081	99.6124	846	2020-06-19 06:49:27	Tanker
310499000	6162.09	17	25.7493	-77.1269	193.018	1687	2019-11-10 00:19:06	Tanker			636018580	1061.67	17.1	25.7939	-77.1115	172.262	939	2020-06-19 06:55:20	Cargo
477969400	11407.2	16.7	25.7694	-77.2203	250.598	614	2019-11-10 00:37:30	Tanker			370269000	5181.67	15.1	25.7721	-77.1513	227.763	1025	2020-06-19 10:53:52	Special Craft
548868000	6586.32	20.1	25.7477	-77.1358	200.233	840	2019-11-10 04:58:28	Cargo			538004060	4012.11	13.2	25.7712	-77.0948	153.1	911	2020-06-19 14:47:38	Cargo
477252700	3470.79	12.6	25.7798	-77.0902	139.151	638	2019-11-10 05:45:58	Cargo			258028000	4008.33	13.3	25.7715	-77.0941	152.043	1378	2020-06-19 14:47:28	Tanker
367353070	3487.28	12.7	25.7782	-77.0921	143.339	1557	2019-11-10 05:46:37	Tanker			319182000	6146.86	13.8	25.7603	-77.1515	218.842	219	2020-06-19 15:01:27	Tanker
249740000	6811.68	6.6	25.8512	-77.1558	321.083	955	2019-11-10 06:26:49	Cargo			477167100	1407.52	11.7	25.7909	-77.1105	169.96	1085	2020-06-19 17:27:46	Cargo
236662000	1749.66	11.2	25.7877	-77.113	180.039	1854	2019-11-20 19:08:34	Tanker			218582000	1506.35	11.7	25.7899	-77.1138	183.367	962	2020-06-19 17:26:46	NA
357657000	6864.89	7.4	25.8535	-77.1533	324.084	3596	2019-11-10 06:28:29	Passenger			636092910	15740.5	10.9	25.7777	-77.2673	259.532	9	2020-06-19 16:39:27	Cargo
309653000	8635.73	15.2	25.7255	-77.1162	182.157	1088	2019-11-10 08:56:21	Passenger			305134000	5530.46	11.8	25.8083	-77.058	84.4327	1510	2020-06-19 17:43:05	Cargo
564979000	8627.05	15.3	25.7257	-77.1185	183.664	1367	2019-11-10 08:55:51	Cargo			538005779	7301.6	12.7	25.7395	-77.1307	194.009	1440	2020-06-20 02:25:53	Tanker
563034100	4632.12	13.7	25.762	-77.1072	172.923	1018	2019-11-10 15:20:50	Tanker			538002775	9960.05	16.7	25.7204	-77.0748	157.52	890	2020-06-20 00:37:32	Tanker
636017061	4628.43	13.7	25.7622	-77.1058	171.185	871	2019-11-10 15:20:30	Tanker			215535000	6558.68	10.4	25.8152	-77.177	281.536	764	2020-06-20 02:55:58	Tanker
477849700	1458.56	10.7	25.7923	-77.1207	212.202	1746	2019-11-10 20:40:10	Cargo			636016399	1469.86	11.8	25.7902	-77.1134	181.712	1154	2020-06-20 05:23:02	Tanker
311492000	2023.46	9.3	25.7852	-77.1132	180.721	3136	2019-11-19 10:23:01	Passenger			305256000	5365.27	10.3	25.8153	-77.1648	284.294	1049	2020-06-20 02:59:48	Cargo
565943000	1075.86	11.3	25.7957	-77.1194	216.924	3502	2019-11-10 20:38:59	Tanker			372008000	1476.12	11.8	25.7902	-77.1139	183.773	1089	2020-06-20 05:22:51	Cargo
255805677	5796.96	13.3	25.7531	-77.1285	195.538	2797	2019-11-26 07:42:38	Cargo			249986000	4212.33	10.8	25.8236	-77.1485	302.198	801	2020-06-20 03:05:59	Tanker
369579000	3401.29	9.6	25.7949	-77.1455	253.763	220	2019-11-19 10:11:32	Tug			538005262	1926.9	13.8	25.7884	-77.1032	149.744	807	2020-06-20 11:56:31	Cargo
215535000	3190.79	12.2	25.7759	-77.1036	163.007	732	2019-11-11 03:31:04	Tanker			538003254	1583.15	8.8	25.8128	-77.1249	310.802	742	2020-06-20 09:50:58	Tanker
563053600	3199.87	12.2	25.7748	-77.1085	172.1	1494	2019-11-11 03:29:45	Cargo			636018332	1702.14	13.9	25.7883	-77.1103	171.241	1171	2020-06-20 11:54:50	Cargo
209087000	4597.32	10.6	25.8147	-77.1571	285.835	1926	2019-11-11 06:43:06	Cargo			356865000	2135.75	13.8	25.7885	-77.0995	141.053	1313	2020-06-20 11:57:23	Cargo
257318000	4599.01	10.1	25.8143	-77.1572	285.204	1584	2019-11-11 06:43:16	Tanker			319133200	4608.02	8.3	25.7696	-77.1397	215.416	14	2020-06-20 10:10:08	Pleasure Craft
310674000	112.491	16.4	25.8032	-77.1119	103.064	5226	2019-11-17 02:33:47	Passenger			577362000	19081.5	12.3	25.769	-77.2994	258.46	602	2020-06-20 16:09:16	Special Craft
245304000	1343.25	12.5	25.7913	-77.1124	177.512	2173	2019-11-11 09:13:23	Passenger			338231000	4897.09	18.1	25.7601	-77.1223	190.977	1050	2020-06-21 21:34:27	Tug
375939000	1213.17	17.6	25.7926	-77.1143	186.478	5980	2019-11-14 12:33:56	Cargo			372308000	8435.9	17.4	25.7297	-77.0919	165.591	1165	2020-06-21 08:03:04	Cargo
538007985	1366.44	12.5	25.7911	-77.1136	182.568	804	2019-11-11 09:13:43	Tanker			565376000	22591.6	14.4	25.8176	-77.3377	274.038	45	2020-06-20 14:44:52	Cargo
256350000	1512.48	12.5	25.7928	-77.1035	141.173	1201	2019-11-11 09:11:03	Cargo			538071410	24721.5	14.7	25.8252	-77.3583	275.67	3	2020-06-20 14:49:51	Passenger
215190000	1772.66	12.4	25.7896	-77.1218	209.883	1323	2019-11-11 09:15:53	Cargo			636016707	7614.91	17.8	25.7359	-77.1269	190.554	736	2020-06-21 07:56:28	Cargo
351399000	4515.59	12	25.763	-77.1074	173.003	1081	2019-11-11 12:41:27	Cargo			255805961	7613.09	17.9	25.7366	-77.1303	193.168	945	2020-06-21 07:55:52	NA
305458000	4518.65	12	25.7628	-77.1086	174.554	985	2019-11-11 12:41:06	Cargo			567097000	8183.63	18.3	25.7731	-77.1873	245.653	566	2020-06-21 21:46:21	Cargo
247187700	4517.45	12.1	25.7631	-77.1063	171.507	775	2019-11-11 12:41:46	Passenger			311000225	6455.23	13.3	25.7455	-77.1062	173.993	1355	2020-06-23 13:54:39	Tanker
636015348	977.21	13.4	25.811	-77.1078	31.3924	3425	2019-11-11 16:30:14	Tanker			477552400	10536.1	10.3	25.8982	-77.1034	5.19367	1190	2020-06-22 00:49:08	Cargo
477854300	3546.87	19.1	25.7715	-77.116	184.919	1810	2019-11-18 05:40:56	Tanker			314005000	34570.8	10.8	25.8403	-77.4553	276.893	15	2020-06-21 23:10:46	Cargo
240158000	774.1	13.2	25.8104	-77.1119	7.72339	994	2019-11-11 16:29:14	Tanker			304182000	35282.7	10.8	25.8409	-77.4624	276.865	13	2020-06-21 23:12:54	NA
215281000	742.941	13.1	25.81	-77.1146	347.223	1591	2019-11-11 16:28:33	Tanker			367781630	35718.8	13.5	25.8335	-77.4676	275.462	8	2020-06-21 23:50:51	Cargo
373051000	741.354	13.2	25.8101	-77.1139	352.46	1136	2019-11-11 16:28:43	Tanker			538006977	2419.96	10.3	25.8118	-77.1352	292.603	1522	2020-06-22 01:20:48	Tanker
351034000	4499.04	11.7	25.7629	-77.1142	181.583	1071	2019-11-12 18:43:15	Cargo			477684200	11824.5	11.9	25.766	-77.2233	249.383	1446	2020-06-22 03:28:43	Cargo
247371500	6057.02	10.5	25.7488	-77.1139	180.927	1861	2019-11-12 03:38:10	Cargo			538007573	11674.5	11.9	25.7658	-77.2217	248.985	27	2020-06-22 03:29:12	Cargo
256427000	6006.61	10.5	25.7492	-77.1119	178.971	1121	2019-11-12 03:38:49	Cargo			636092883	19350.4	11.5	25.7854	-77.3049	264.091	6	2020-06-22 03:05:32	Cargo
371475000	6271.27	10.5	25.7473	-77.1208	187.175	778	2019-11-12 03:36:00	Cargo			257424000	4298.34	12.5	25.7646	-77.1123	179.174	1203	2020-06-22 03:58:33	Cargo
566097000	5479.93	15.1	25.7617	-77.1423	212.361	738	2019-11-12 05:15:19	Cargo			371154000	4384.46	12.6	25.7813	-77.1492	235.873	2106	2020-06-28 10:03:46	Passenger
371923000	3100.99	7.7	25.7832	-77.1343	223.554	3735	2019-11-13 05:49:56	Special Craft			339854000	64152.7	11	25.7741	-77.7518	267.216	1	2020-06-22 07:10:06	Pleasure Craft
636016231	4447.01	15.1	25.7635	-77.1177	186.073	2092	2019-11-12 05:20:37	Cargo			255805923	4665.47	11	25.7676	-77.0885	148.455	1048	2020-06-22 21:53:07	Cargo
566414000	5922.13	17.6	25.7521	-77.1295	196.236	1106	2019-11-12 07:58:58	Tanker			477767300	4473.42	11	25.7866	-77.1535	245.226	1112	2020-06-22 22:13:37	Cargo
477999500	5919.88	17.6	25.7517	-77.1275	194.165	1381	2019-11-12 07:59:22	NA			356329000	9431.42	10.2	25.7216	-77.087	164.044	77	2020-06-22 11:20:48	Cargo
319545000	5922.22	17.6	25.7514	-77.1264	193.109	1128	2019-11-12 07:59:34	Tanker			269023000	5165.55	11.1	25.7891	-77.162	252.034	773	2020-06-22 22:16:17	Cargo
563088800	6799.74	19.1	25.744	-77.1297	194.209	1633	2019-11-12 09:31:42	Tanker			538008034	1984.58	11.8	25.8137	-77.0967	54.9927	1071	2020-06-23 09:30:59	Tanker
636016185	6801.96	19.1	25.7433	-77.1264	191.39	1497	2019-11-12 09:32:16	Cargo			477170700	447.806	11.7	25.8045	-77.1086	75.1592	663	2020-06-23 09:35:20	Tanker
370269000	1747.7	21.2	25.788	-77.1092	167.818	7326	2019-11-21 17:33:07	Special Craft			373773000	423.215	11.8	25.7999	-77.1145	202.103	1225	2020-06-23 09:37:29	Cargo
538007090	4501.11	11.7	25.7629	-77.1148	182.344	1263	2019-11-12 18:43:25	Tanker			636017367	197.885	11.7	25.8024	-77.1114	127.689	1146	2020-06-23 09:36:20	Cargo
210911000	3235.91	13.2	25.7743	-77.1117	177.857	1819	2019-11-12 20:07:00	Cargo			219208000	13226	14.1	25.7513	-77.2315	243.992	1208	2020-06-23 19:51:54	Cargo
367059950	3267.27	13.2	25.7742	-77.1171	187.358	226	2019-11-12 20:08:20	Tug			538006050	3881.45	14	25.7695	-77.1033	165.606	847	2020-06-23 19:21:10	NA
636018088	1596.3	17.4	25.7904	-77.1061	154.525	1511	2019-11-12 23:38:16	Cargo			636018913	1775.84	9.8	25.8186	-77.1072	18.9168	1089	2020-06-23 23:53:41	Cargo
566204000	1588.12	17.4	25.7903	-77.1066	156.434	1223	2019-11-12 23:38:22	Cargo			241473000	2630.07	9.8	25.826	-77.1048	17.9971	1482	2020-06-23 23:50:51	Tanker
245482000	1574.84	17.4	25.7898	-77.1087	164.529	1057	2019-11-12 23:38:47	Cargo			636092712	28485.7	13.9	25.8167	-77.3966	273.041	38	2020-06-24 02:11:24	Cargo
538005808	5729.38	16.9	25.7541	-77.1301	197.394	442	2019-11-13 03:37:42	Tanker			636017294	31182.3	9.9	26.072	-77.0196	17.3407	52	2020-06-23 22:16:11	Cargo
235060453	5441.61	16.5	25.7597	-77.0882	153.027	789	2019-11-13 03:46:06	NA			248089000	46982.3	7.9	25.7787	-77.5806	266.738	6	2020-06-24 03:20:56	Cargo
244830547	5438.53	16.6	25.7602	-77.0874	151.959	3132	2019-11-13 03:46:18	Passenger			565042000	3061.43	13.1	25.7758	-77.1127	179.605	1117	2020-06-24 04:54:10	NA
477214700	245.784	9.8	25.8046	-77.115	302.426	1298	2019-11-13 07:28:17	Cargo			248017000	2305.78	11	25.7834	-77.1193	195.987	1161	2020-06-24 15:20:07	Cargo
518403000	2307.4	7.5	25.7915	-77.1318	234.822	232	2019-11-13 05:53:56	Pleasure Craft			241090000	1674.39	10	25.7885	-77.1158	189.674	2561	2020-06-24 13:49:24	NA
414708000	920.191	9.8	25.7962	-77.1175	209.705	103	2019-11-13 07:31:27	Cargo			351445000	1677.08	9.9	25.7896	-77.1197	203.756	1139	2020-06-24 13:50:44	Cargo
241195000	9579.29	12.4	25.7199	-77.0885	165.261	1052	2019-11-13 13:15:09	Cargo			636018285	3146.87	11	25.7908	-77.141	243.357	1156	2020-06-24 15:26:56	Tanker
538006810	9583.77	12.4	25.7192	-77.0912	166.929	949	2019-11-13 13:15:50	Tanker			248851000	4741.08	7.5	25.8446	-77.1001	15.6258	230	2020-06-29 03:06:22	Tanker
538004759	21452.5	11.7	25.8159	-77.3264	273.767	5	2019-11-13 16:22:46	Cargo			354580000	7641.33	6.4	25.8266	-77.1847	289.756	36	2020-06-25 10:25:54	Special Craft
355234000	448.567	13.9	25.7994	-77.1128	178.072	21	2019-11-13 18:00:25	Cargo			671082100	37006.8	8.8	25.9735	-77.4308	300.815	2	2020-06-24 18:43:05	Special Craft
374816000	417.106	13.7	25.7999	-77.1116	160.87	3496	2019-11-13 18:00:43	Tanker			235009420	50918.5	0.1	26.0634	-77.5321	304.683	2	2020-06-25 07:28:54	Tanker
538008330	417.219	13.7	25.8001	-77.1109	151.22	3307	2019-11-13 18:00:54	Tanker			247369100	1846.72	10.4	25.7889	-77.1219	209.124	1007	2020-06-24 19:44:03	Tanker
354895000	5889.08	14.3	25.7623	-77.0757	140.81	1717	2019-11-13 14:34:37	Tanker			311040900	1011.77	10.3	25.7956	-77.1077	149.157	1102	2020-06-24 19:39:03	Cargo
538070269	5892.34	14.3	25.761	-77.0775	143.034	166	2019-11-13 14:34:07	Pleasure Craft			636017833	1904.79	10.6	25.7863	-77.113	180.316	432	2020-06-24 20:58:43	Tanker
636018053	516	14.4	25.7989	-77.1142	194.391	1686	2019-11-13 18:00:05	Cargo			370271000	34750.9	9.1	25.7976	-77.4594	268.999	1	2020-06-24 21:41:33	Cargo
636012767	424.549	13.7	25.7997	-77.112	167.473	1341	2019-11-13 18:00:37	Tanker			636016435	1370.73	9.7	25.794	-77.1218	220.075	669	2020-06-25 03:36:13	Cargo
357299000	688.034	14.1	25.802	-77.1063	103.079	1329	2019-11-13 18:02:06	Tanker			215460000	961.984	13.2	25.796	-77.108	148.991	1273	2020-06-25 07:51:01	Tanker
241662000	416.052	13.6	25.8	-77.1114	158.026	3801	2019-11-13 18:00:47	Tanker			636013748	950.701	13.2	25.7958	-77.1087	153.378	875	2020-06-25 07:51:11	Tanker
305719000	420.911	13.7	25.7998	-77.1118	164.702	2165	2019-11-13 18:00:41	Cargo			248359000	17958.4	15.6	25.7232	-77.2685	240.23	7	2020-06-25 09:03:32	Tanker
538004165	5456.18	12.5	25.8423	-77.1463	322.307	1162	2019-11-14 02:13:02	Cargo			636014184	6072.8	6	25.8384	-77.1596	309.787	816	2020-06-25 10:40:24	Tanker
538005350	2219.62	9.4	25.7846	-77.1053	159.846	1504	2019-11-14 03:17:13	Tanker			232419000	6071.45	6.1	25.8386	-77.1594	310.124	738	2020-06-25 10:40:34	Special Craft
312719000	1992.85	7.7	25.8214	-77.1112	4.9704	632	2019-11-14 04:23:51	Tanker			371618000	6148.32	6.3	25.8364	-77.1623	306.579	56	2020-06-25 10:38:34	Cargo
245578000	4870.99	11.9	25.7636	-77.0924	155.155	1492	2019-11-14 05:15:20	Cargo			319131300	4678.37	17.3	25.7726	-77.1448	222.946	931	2020-06-25 16:53:00	Tanker
338789000	5519.78	11.8	25.7556	-77.1283	196.124	1065	2019-11-14 05:25:29	Cargo			249896000	6303.24	6.3	25.8499	-77.1493	324.826	1239	2020-06-25 10:48:54	Tanker
477110400	6714.59	15.2	25.7431	-77.1187	184.907	1247	2019-11-14 09:08:43	Tanker			538007501	4128.71	17.2	25.7685	-77.1273	200.267	1551	2020-06-25 16:56:24	Cargo
209722000	6677.12	15.3	25.744	-77.1242	189.723	1340	2019-11-14 09:07:31	Cargo			357281000	10655.2	6.9	25.8996	-77.1102	1.49424	172	2020-06-25 11:21:35	Passenger
563853000	6672.98	15.4	25.7442	-77.1251	190.517	1944	2019-11-14 09:07:19	Tanker			354895000	4107.69	17.3	25.7676	-77.1232	194.491	2475	2020-06-25 16:57:12	Tanker
220407000	6680.29	15.3	25.7439	-77.1233	188.919	843	2019-11-14 09:07:43	Tanker			240728000	5198.2	9	25.7633	-77.0861	148.916	406	2020-06-26 17:11:59	Tanker
636013683	1284.98	17.9	25.7928	-77.1078	156.61	1252	2019-11-14 12:32:43	Tanker			305461000	4109.01	17.2	25.7678	-77.1243	195.975	1436	2020-06-25 16:57:00	Cargo
257902000	1210.08	17.6	25.7925	-77.1126	178.372	1909	2019-11-14 12:33:37	Cargo			309987000	7087.97	12.3	25.7524	-77.0703	143.04	799	2020-06-25 23:38:24	Tanker
477627300	1209.12	17.6	25.7926	-77.1138	183.92	1642	2019-11-14 12:33:49	Cargo			636019823	5643.44	12.3	25.7528	-77.1064	173.356	893	2020-06-25 23:47:54	Cargo
636017501	1211.29	17.6	25.7925	-77.1121	176.248	1587	2019-11-14 12:33:31	Tanker			538003455	4801.08	10.8	25.7626	-77.1288	199.298	762	2020-06-26 00:37:54	Tanker
636017641	2280.69	14.3	25.7829	-77.113	180.047	2133	2019-11-14 22:06:04	NA			241458000	4662.82	15.3	25.7632	-77.1266	196.969	1097	2020-06-26 02:40:53	Tanker
356093000	2293.72	14.5	25.7829	-77.1103	173.386	1218	2019-11-14 22:05:28	Cargo			564446000	412.457	14.5	25.8004	-77.1106	146.148	2807	2020-06-26 05:49:47	Cargo
538006307	2286.19	14.2	25.7828	-77.1143	183.382	978	2019-11-14 22:06:22	Tanker			352858000	378.701	14.5	25.8003	-77.1115	157.043	797	2020-06-26 05:49:59	Cargo
563045300	5997.74	13.4	25.7496	-77.1064	173.779	1323	2019-11-14 23:17:07	Tanker			538005443	4535.95	13	25.7857	-77.1537	244.25	739	2020-06-26 08:19:52	Tanker
248325000	5946.95	13.4	25.7498	-77.114	181.023	1908	2019-11-14 23:18:57	Passenger			309072000	1893.13	7	25.8202	-77.1092	11.2457	1262	2020-06-29 02:53:32	Tanker
255804280	7470.17	13.5	25.751	-77.1598	218.825	1554	2019-11-14 23:29:57	Tanker			218355000	4938.08	13	25.7861	-77.1583	246.983	1951	2020-06-26 08:18:42	Cargo
636019348	3814.68	8.1	25.8166	-77.1481	292.545	3742	2019-11-16 17:52:18	Cargo			538003321	6064.11	12.4	25.7499	-77.1001	167.829	1545	2020-06-28 10:49:18	Tanker
241343000	7104.41	12.5	25.7414	-77.1308	194.548	1111	2019-11-15 06:34:43	Tanker			218841000	6557.87	18.8	25.7443	-77.1134	180.406	798	2020-06-26 13:28:39	NA
636092041	8722.89	14.9	25.7691	-77.0347	115.967	894	2019-11-15 01:07:06	Cargo			538003870	3864.94	17.8	25.7702	-77.1245	197.371	670	2020-06-26 10:51:40	Tanker
319863000	2119.55	13.2	25.7851	-77.1188	196.055	1186	2019-11-15 09:59:07	Pleasure Craft			372051000	6557.16	18.8	25.7443	-77.1128	179.903	1866	2020-06-26 13:28:33	Cargo
538008584	4170.71	16	25.7666	-77.1213	191.488	1391	2019-11-15 11:47:53	Cargo			215069000	6556.78	18.8	25.7443	-77.1123	179.399	498	2020-06-26 13:28:27	Cargo
220416000	4168.81	15.9	25.7667	-77.1217	192.161	735	2019-11-15 11:47:48	Cargo			671103100	16847.7	11.1	25.7114	-76.9792	127.353	4	2020-06-26 13:07:58	Cargo
636017659	4181.62	15.9	25.7679	-77.127	199.654	364	2019-11-15 11:46:41	Cargo			247304600	6557.36	18.8	25.7443	-77.1111	178.391	1108	2020-06-26 13:28:15	Cargo
636091790	4165.59	15.9	25.767	-77.1232	194.181	1033	2019-11-15 11:47:29	Cargo			563000700	11908.3	13.9	25.6977	-77.0919	169.822	748	2020-06-26 14:52:58	Cargo
354456000	4202.64	15.9	25.7658	-77.118	186.932	1506	2019-11-15 11:48:35	Cargo			305101000	4956	16.9	25.7593	-77.1206	188.869	476	2020-06-26 16:06:27	NA
538006976	1714.7	10	25.7881	-77.1151	187.327	3418	2019-11-25 17:05:54	Tanker			636012647	3193.21	9.1	25.7759	-77.1222	196.818	1510	2020-06-26 17:25:47	Tanker
319072300	6768.83	10.3	25.8438	-77.1637	311.476	726	2019-11-16 01:32:30	Pleasure Craft			477764400	4059.92	10.1	25.8182	-77.15	293.883	923	2020-06-27 02:52:46	Cargo
538002920	5865.06	19.5	25.7526	-77.129	195.909	2473	2019-11-24 23:07:44	Tanker			636014114	4984.17	13.9	25.7588	-77.1194	187.395	669	2020-06-26 22:41:36	Tanker
311027100	5918.66	6.8	25.8249	-77.167	293.846	2172	2019-11-28 10:02:56	Passenger			636019217	3050.3	7.5	25.8302	-77.1057	13.7297	496	2020-06-29 02:59:03	Tanker
256076000	4598.01	8.8	25.7641	-77.0983	161.529	756	2019-11-16 04:32:43	Tanker			636016433	4973.59	13.9	25.7593	-77.1221	190.544	1626	2020-06-26 22:42:15	Cargo
372608000	4598.34	8.8	25.7634	-77.1009	164.911	848	2019-11-16 04:31:43	Tanker			538090363	5122.49	13.7	25.7573	-77.1104	177.179	926	2020-06-26 22:39:26	Tanker
319111300	4600.47	8.9	25.7642	-77.0979	161.013	214	2019-11-16 04:32:52	Pleasure Craft			255806078	4975.41	13.9	25.7591	-77.1207	188.976	1298	2020-06-26 22:41:55	Cargo
215497000	4679.83	8.5	25.7614	-77.1082	174.257	988	2019-11-16 04:28:53	Tanker			319582000	9534.48	13.8	25.778	-77.2038	252.763	460	2020-06-26 23:01:52	Pleasure Craft
319097600	5471.93	14.3	25.7541	-77.1095	176.418	762	2019-11-16 08:56:24	Pleasure Craft			367724340	38258	0.5	26.0243	-77.4065	309.968	1	2020-06-27 00:06:38	Tug
319095552	67086	12.8	25.8545	-77.7797	275.008	1	2019-11-16 07:35:14	NA			477224700	4442.14	13.9	25.7651	-77.1259	196.875	1539	2020-06-27 18:14:02	Cargo
248913000	5512.6	20.1	25.7563	-77.1304	198.434	704	2019-11-16 08:03:02	Pleasure Craft			466241000	839.302	11.1	25.8103	-77.1166	334.454	453	2020-06-27 19:13:24	Tanker
319068100	5471.72	14.3	25.7542	-77.1093	176.156	400	2019-11-16 08:56:18	Pleasure Craft			373872000	4676.31	11.5	25.8273	-77.0745	55.4063	118	2020-06-27 19:26:33	Cargo
311777000	3899.09	17.4	25.7682	-77.1128	179.815	918	2019-11-17 00:49:43	Special Craft			636092822	37376.2	11.8	25.8183	-77.4853	272.614	1	2020-06-27 20:00:05	Cargo
247287500	5771.48	10.7	25.7562	-77.0886	155.104	1886	2019-11-16 14:47:21	Tanker			564151000	15563.8	8.9	25.7503	-77.2566	247.695	281	2020-06-27 20:29:48	Tanker
538004353	483.331	8	25.8074	-77.115	334.638	2176	2019-11-25 03:55:03	Passenger			565971000	6325.21	11.9	25.7465	-77.1082	175.669	1252	2020-06-27 21:47:05	Cargo
538005550	5904.4	10.4	25.7603	-77.0783	144.13	1038	2019-11-16 14:50:51	Tanker			538003668	6326.18	11.9	25.7464	-77.1101	177.384	683	2020-06-27 21:46:34	Passenger
377901123	3473.47	12.3	25.7725	-77.1183	188.844	1799	2019-11-29 04:23:33	Cargo			311036200	3782.5	8.1	25.8235	-77.1435	306.065	1495	2020-06-28 05:22:30	Cargo
257085720	3821.89	7.6	25.8156	-77.1486	290.706	1128	2019-11-16 17:51:46	Cargo			431132000	3784.32	8.2	25.8232	-77.1437	305.494	1904	2020-06-28 05:22:40	Tanker
538003267	1497.15	11.3	25.7915	-77.1061	152.699	2973	2019-11-27 13:58:08	Tanker			311033500	3790.76	8.1	25.8226	-77.1443	304.238	508	2020-06-28 05:23:00	Cargo
368549000	3815.47	7.8	25.8162	-77.1483	291.919	1232	2019-11-16 17:52:06	Special Craft			338789000	31475.4	8.2	25.8742	-77.417	284.566	2	2020-06-28 04:18:09	Cargo
370355000	3811.44	8.8	25.818	-77.1474	295.195	1191	2019-11-16 17:52:56	Tanker			255806094	32738.2	5.2	25.7572	-77.4353	261.022	19	2020-06-28 08:20:53	Cargo
316127000	3822.23	7.7	25.8155	-77.1486	290.647	400	2019-11-16 17:51:43	Special Craft			240839000	3885.12	12.6	25.7817	-77.1433	231.475	1800	2020-06-28 10:02:16	Tanker
538007621	3898.4	17.5	25.7683	-77.1139	181.403	1992	2019-11-17 00:49:55	Tanker			371811000	30565.3	5.3	25.75	-77.4119	258.829	3	2020-06-28 08:36:13	Cargo
311361000	6309.3	17.8	25.7805	-77.0554	113.825	740	2019-11-17 00:38:31	Passenger			373649000	10842.9	12.2	25.7453	-77.0259	126.541	24	2020-06-28 10:29:38	Cargo
368094060	8154.94	17.9	25.7911	-77.0328	99.702	135	2019-11-17 00:33:54	Pleasure Craft			538004034	3777.38	7.5	25.8364	-77.1033	14.6894	138	2020-06-29 03:02:12	Tanker
374375000	114.597	16.5	25.8024	-77.1131	186.179	1681	2019-11-17 02:33:29	Tanker			636016731	9317.22	11.2	25.7985	-77.2057	266.607	9	2020-06-30 20:37:31	Tanker
636018002	154.511	16.5	25.8021	-77.1135	199.77	3065	2019-11-17 02:33:23	Tanker			538002844	2857.98	7.5	25.8285	-77.1063	13.4094	28	2020-06-29 02:58:13	Tanker
367781630	5789.5	18.7	25.7662	-77.1534	224.398	18	2019-11-17 01:47:26	Cargo			319151300	5822.18	12.3	25.7512	-77.1197	186.667	142	2020-06-28 10:54:28	Pleasure Craft
355139000	24316.1	18.6	25.8324	-77.3533	277.661	3	2019-11-17 01:48:52	Cargo			538008097	8145.3	12.3	25.7474	-77.0604	139.807	32	2020-06-28 10:38:48	Tanker
538008519	4779.09	11.9	25.7603	-77.1118	178.573	1596	2019-11-17 05:53:00	Cargo			538070840	5820.44	12.3	25.7509	-77.1153	182.316	158	2020-06-28 10:53:18	Pleasure Craft
563073400	2752.59	11.5	25.7792	-77.1071	167.789	1660	2019-11-17 08:25:48	Tanker			215640000	13269.5	5.2	25.6842	-77.1005	174.621	16	2020-06-28 11:51:02	Cargo
563073700	2703.05	11.6	25.7815	-77.1011	154.148	1242	2019-11-17 08:23:58	Cargo			338619000	51583.2	0	26.0668	-77.5376	304.679	4	2020-06-28 13:47:10	Cargo
353566000	2700.6	11.5	25.7811	-77.1022	156.66	2030	2019-11-17 08:24:19	Tanker			319506000	5095.67	16.9	25.7631	-77.1372	208.454	106	2020-06-29 00:56:56	Pleasure Craft
311046100	6822.4	19.4	25.7446	-77.1328	196.907	1369	2019-11-17 11:55:32	Cargo			257067210	44209.1	8	25.9169	-77.5358	286.702	4	2020-06-29 03:59:22	Tanker
319762000	6853.8	19.4	25.7453	-77.1364	199.968	179	2019-11-17 11:54:56	Pleasure Craft			636018931	1875.69	7.4	25.8202	-77.1103	8.06346	248	2020-06-29 02:53:04	Cargo
229074000	5373.48	17.9	25.7559	-77.1237	191.55	1141	2019-11-18 03:59:07	Passenger			352135000	7245.21	16.7	25.7495	-77.0722	145.77	106	2020-06-29 00:44:01	Cargo
367799380	963.528	15.8	25.7961	-77.1079	148.337	1283	2019-11-17 19:51:44	Cargo			566086000	4511.71	7.5	25.8427	-77.1009	15.4279	27	2020-06-29 03:05:22	Cargo
255805943	959.855	15.8	25.7956	-77.1088	154.669	2133	2019-11-17 19:51:31	NA			319193000	7475.04	16.8	25.7489	-77.0691	144.14	32	2020-06-29 00:43:26	Pleasure Craft
255804290	1027.65	15.7	25.7942	-77.112	174.525	563	2019-11-17 19:50:49	Tanker			241659000	26249.7	5.8	25.7823	-77.3736	264.909	16	2020-06-29 20:34:14	Tanker
636016399	1503.38	15.8	25.8003	-77.0984	103.577	2025	2019-11-17 19:53:55	Tanker			566393000	34110.3	7.4	25.8325	-77.4516	275.517	3	2020-06-29 00:27:42	Tanker
372530000	3311.2	15.9	25.7765	-77.0986	154.337	560	2019-11-17 22:14:49	Tanker			477252300	3891.01	7.5	25.8374	-77.103	14.8278	114	2020-06-29 03:02:42	Tanker
338760000	3152.17	11.8	25.7775	-77.1	155.795	942	2019-11-17 23:27:55	Cargo			477631400	9256.4	13.8	25.7266	-77.0766	156.937	777	2020-06-29 08:16:23	Tanker
538006287	3154.19	11.7	25.7785	-77.0978	151.448	1009	2019-11-17 23:28:35	Cargo			319118200	45494.3	13.2	25.8812	-77.5585	281.076	7	2020-06-29 07:24:18	Pleasure Craft
310531000	4769.94	10.4	25.7659	-77.0897	150.884	1769	2019-11-18 02:00:04	Passenger			219154000	11309.4	5.6	25.7262	-77.1867	220.701	837	2020-06-29 22:26:54	Tanker
357444000	3472.11	18.9	25.7734	-77.1032	163.773	2325	2019-11-18 05:38:44	Cargo			563755000	6279.88	13.4	25.7634	-77.1573	224.903	667	2020-06-29 23:39:29	Tanker
566393000	3457.58	19.1	25.7723	-77.1107	176.231	647	2019-11-18 05:40:01	Tanker			305729000	4912.67	13.6	25.7633	-77.1338	205.111	610	2020-06-29 23:33:50	Cargo
271042520	3446.34	19.1	25.7725	-77.109	173.479	1608	2019-11-18 05:39:44	Tanker			244810614	18070.3	5.6	25.7564	-77.2854	253.18	544	2020-06-29 21:27:14	Cargo
441076000	3508.41	19.1	25.7718	-77.1142	182.127	1229	2019-11-18 05:40:37	Tanker			548986000	161598	0.6	26.2678	-78.6435	288.991	2	2020-06-30 08:27:06	Cargo
311020600	2168.36	21.3	25.7841	-77.1158	187.686	2731	2019-11-22 13:01:04	Passenger			477214700	5424.53	18.5	25.7572	-77.095	160.76	580	2020-06-30 13:51:25	Cargo
636014623	5397.08	13.2	25.755	-77.1073	173.976	1152	2019-11-18 08:01:35	Tanker			538008516	16690.4	5.4	25.6911	-77.0022	138.379	58	2020-06-30 21:41:25	Tanker
538008065	5406.92	13.2	25.7554	-77.1036	170.034	1642	2019-11-18 08:00:47	Tanker			357988000	5761.47	18.3	25.7697	-77.1567	229.445	49	2020-06-30 14:02:31	Cargo
577362000	3869.67	12.5	25.8128	-77.0758	74.3706	3069	2019-11-18 20:10:15	Special Craft			367546250	4685.23	18.5	25.7612	-77.1145	181.947	462	2020-06-30 13:54:55	Tug
218853000	5750.44	12.9	25.7549	-77.1334	200.758	1416	2019-11-18 12:35:41	Cargo			403517001	10204.2	18.3	25.7809	-77.2116	255.778	158	2020-06-30 14:12:31	Tanker
636016464	5707.79	12.9	25.7531	-77.125	192.162	1812	2019-11-18 12:37:52	Tanker			235009400	5062.07	18.3	25.767	-77.1434	216.916	2	2020-06-30 14:00:07	Tanker
636019219	7447.4	13.1	25.7507	-77.1589	218.139	1306	2019-11-18 15:33:49	Tanker			538005425	1461.75	11.5	25.792	-77.1202	209.592	83	2020-06-30 20:13:11	Tanker
636015860	9224.26	17.4	25.7202	-77.1124	179.653	1239	2019-11-18 18:00:11	Cargo			338188000	4772.9	18.4	25.7653	-77.1351	207.577	34	2020-06-30 13:58:37	Tanker
636017392	632.504	13.2	25.8081	-77.1166	324.711	1228	2019-11-18 20:20:34	Cargo			538002992	9249.07	18.3	25.7789	-77.2011	252.861	12	2020-06-30 14:10:37	NA
255806058	546.797	12.9	25.8084	-77.1132	356.895	1527	2019-11-18 20:19:44	Tanker			308976000	8856.02	18.3	25.7781	-77.1967	251.42	1	2020-06-30 14:09:49	Cargo
563061100	559.249	12.9	25.8082	-77.1147	342.178	1115	2019-11-18 20:20:04	Tanker			538001663	37122.4	18.2	25.8716	-77.4755	281.873	5	2020-06-30 15:02:55	Passenger
636092656	3071.62	14.8	25.7775	-77.1022	159.648	1814	2019-11-18 20:54:39	Cargo			372697000	14895.4	18	25.7944	-77.2611	266.154	7	2020-06-30 14:21:49	Cargo
241614000	4015.49	15.1	25.7694	-77.1268	200.154	1362	2019-11-18 21:00:15	Tanker			246100000	15670	18	25.7968	-77.269	267.34	19	2020-06-30 14:23:19	Cargo
636011289	7282.5	19.9	25.7408	-77.1351	197.683	963	2019-11-18 23:01:18	Tanker			369037000	44028.2	18.1	25.8958	-77.5401	283.604	2	2020-06-30 15:15:24	Tanker
219025000	6788.92	15	25.7452	-77.092	162.048	2121	2019-11-19 03:30:20	Tanker			636019088	12631.1	11.1	25.7104	-77.1857	215.16	30	2020-06-30 16:56:29	Cargo
311316000	5710.67	14.4	25.7525	-77.1041	171.085	1563	2019-11-25 09:24:01	Passenger			636090886	32363.7	11	25.8431	-77.4327	277.91	1	2020-06-30 18:21:38	Tanker
338058000	4392.49	15.7	25.764	-77.1178	186.326	2289	2019-11-19 07:20:13	Cargo			369235000	2093.56	11.5	25.7928	-77.1302	235.47	179	2020-06-30 20:16:01	Tug
538008274	21325	14.5	25.7852	-77.3246	264.565	1	2019-11-19 05:14:33	Cargo			338781000	30211.7	11.3	25.8021	-77.4142	269.774	1	2020-06-30 20:25:00	Cargo
538007063	4339.43	15.8	25.7646	-77.1078	173.202	2195	2019-11-19 07:22:18	Cargo			477950300	13330.2	5.2	25.6835	-77.1024	175.464	389	2020-06-30 22:44:15	Cargo
319069900	4336.99	15.8	25.7645	-77.1082	173.735	881	2019-11-19 07:22:13	Pleasure Craft			310602000	183614	0	26.5301	-78.7636	296.489	1	2020-06-30 22:03:25	Tanker
273437230	1919.31	9.5	25.7867	-77.1177	194.463	1112	2019-11-19 10:21:22	Special Craft			305030000	14432	5.2	25.6877	-77.0469	152.781	6	2020-06-30 22:09:15	Cargo
311012400	1916.99	9.5	25.7868	-77.1183	196.058	1058	2019-11-19 10:21:12	Special Craft			356088000	185897	0.1	26.5196	-78.7944	295.756	2	2020-06-30 22:08:45	Cargo
533894000	1949.33	9.6	25.7861	-77.116	188.967	1970	2019-11-19 10:22:01	Tanker			355831000	2181.43	16.6	25.7843	-77.1077	166.042	5976	2020-07-14 23:15:45	Passenger
538008370	1934.92	9.6	25.788	-77.1219	207.636	1302	2019-11-19 10:19:53	Tanker			538003321	1606.74	11.1	25.804	-77.0969	87.7385	729	2020-07-01 07:05:21	Tanker
563051500	3322.41	11.7	25.7737	-77.1171	187.212	1342	2019-11-19 10:45:45	Cargo			308017000	403.242	7.7	25.8071	-77.1128	1.64883	9374	2020-07-28 02:47:09	Passenger
565355000	3799.94	12.1	25.7731	-77.0952	152.249	1678	2019-11-19 10:51:45	Tanker			353735000	3126.8	11	25.7754	-77.1093	173.254	1193	2020-07-29 08:25:42	Special Craft
538004118	6694.16	15.3	25.7432	-77.1076	175.459	802	2019-11-19 14:17:40	Tanker			477631400	3720.29	11.1	25.8284	-77.0881	41.9133	757	2020-07-01 06:57:00	Tanker
311000879	3982.14	9.7	25.836	-77.1297	335.147	895	2019-11-25 08:03:16	Passenger			354913000	3447.16	13	25.7735	-77.1037	164.515	123	2020-07-01 13:29:35	Tanker
319139700	4051.81	17.5	25.7671	-77.1085	173.787	717	2019-11-19 22:18:55	Passenger			240728000	2545.02	10.5	25.8019	-77.1383	266.233	1625	2020-07-02 01:19:42	Tanker
477691300	7654.72	11.8	25.7343	-77.1126	179.769	1824	2019-11-19 20:44:05	Tanker			240963000	4101.01	8.8	25.7953	-77.073	102.721	247	2020-07-01 04:01:22	Cargo
229731000	4054.61	17.5	25.7673	-77.107	171.524	1507	2019-11-19 22:18:37	Cargo			538006975	1200.93	13.6	25.7926	-77.112	175.301	2288	2020-07-11 18:28:06	Tanker
636012425	4052.08	17.5	25.7672	-77.1079	172.907	1365	2019-11-19 22:18:48	Tanker			356883000	3424.53	13	25.7729	-77.1077	171.154	1341	2020-07-01 13:28:35	Passenger
538002662	9335.35	19.2	25.7244	-77.0806	159.764	684	2019-11-20 01:37:56	Tanker			375902000	2388.27	11.1	25.7832	-77.1047	159.924	3797	2020-07-01 07:12:30	Cargo
248307000	7512.61	19.4	25.7381	-77.1328	195.313	1417	2019-11-20 01:47:02	Tanker			370039000	2206.93	8.1	25.8233	-77.1142	356.744	6570	2020-07-21 04:10:35	Passenger
319072700	2941.15	17.5	25.7941	-77.0855	110.738	653	2019-11-24 12:26:57	Pleasure Craft			538004034	3658.84	12.9	25.7711	-77.1201	191.253	2436	2020-07-01 13:25:24	Tanker
220636000	3542.08	11.6	25.7829	-77.14	229.887	5768	2019-11-20 17:41:44	Tanker			248939000	3959.72	9.7	25.8367	-77.0986	21.2607	80	2020-07-20 05:29:06	Passenger
246167000	2617.64	16.8	25.7822	-77.1014	153.954	3001	2019-11-21 09:12:31	NA			248325000	3290.43	3.8	25.7754	-77.1239	199.323	851	2020-07-19 22:09:48	Passenger
538005575	1555.55	6.5	25.8082	-77.1275	290.042	1363	2019-11-20 04:08:43	Tanker			353486000	2402.66	10.5	25.809	-77.1361	284.951	4094	2020-07-02 01:22:12	NA
257077000	3495.11	13	25.7721	-77.1164	185.628	1080	2019-11-20 02:36:12	Tanker			354580000	1890.81	11.2	25.789	-77.1029	147.778	3847	2020-07-22 07:04:20	Special Craft
477045500	1502.37	10.6	25.803	-77.098	92.0858	1557	2019-11-20 07:45:47	Cargo			249047000	693.101	18.3	25.8007	-77.1067	115.653	2488	2020-07-09 17:45:02	Passenger
219683000	1450.13	10.8	25.7968	-77.1005	120.616	1072	2019-11-20 07:47:57	Tanker			249080000	7269.02	11.2	25.8602	-77.0766	29.9	359	2020-07-01 06:46:10	Tanker
256647000	1186.35	11.1	25.796	-77.1215	226.085	1335	2019-11-20 08:19:23	Tanker			538002844	4099.46	8.7	25.7965	-77.0728	100.814	34	2020-07-01 04:01:52	Tanker
255803880	3209.93	16.7	25.7788	-77.0961	148.348	1194	2019-11-20 13:19:48	Tanker			249973000	5689.01	16	25.7585	-77.0855	151.241	228	2020-07-27 01:34:17	Passenger
311000467	3194.35	16.8	25.7774	-77.0993	154.787	868	2019-11-20 13:20:29	Tanker			374282000	4103.77	8.8	25.7949	-77.0731	103.42	304	2020-07-01 04:01:11	Tanker
319194000	3199.84	16.9	25.7768	-77.1007	157.574	1227	2019-11-20 13:20:48	Tanker			356449000	1388.57	13	25.7994	-77.126	250.845	3932	2020-07-10 07:25:22	Special Craft
248944000	787.958	10.9	25.7971	-77.1165	206.44	1985	2019-11-20 16:58:54	Tanker			308109000	4099.26	8.8	25.7961	-77.0729	101.517	1094	2020-07-01 04:01:41	Tanker
477627100	1748.47	11.2	25.7877	-77.1146	185.469	1669	2019-11-20 19:08:04	Cargo			241592000	179967	3.1	26.4324	-78.772	293.253	1	2020-07-01 02:47:58	Tanker
205736000	213.551	11.1	25.8024	-77.1148	238.087	1298	2019-11-20 16:57:05	Tanker			352306000	1231.94	9.9	25.8133	-77.1072	27.9074	2955	2020-07-20 05:38:06	Special Craft
538004785	1788.71	10.7	25.8191	-77.1088	13.5234	1320	2019-11-20 16:51:25	Cargo			309072000	3578.17	12.9	25.7714	-77.1176	187.467	1711	2020-07-01 13:26:04	Tanker
311052900	1751.25	11.2	25.7878	-77.1152	187.343	1434	2019-11-20 19:07:54	Special Craft			538008641	6632.53	8.8	25.8335	-77.0557	59.7405	24	2020-07-01 04:18:22	Cargo
304343000	1756.66	11.1	25.7878	-77.1158	189.393	746	2019-11-20 19:07:43	Cargo			210950000	2425.44	10.5	25.8062	-77.1369	277.212	712	2020-07-02 01:21:13	Cargo
538004316	5687.24	15.2	25.7564	-77.0902	156.447	1335	2019-11-21 00:41:46	Tanker			371154000	1940.25	15.3	25.8004	-77.132	259.955	3176	2020-07-14 01:11:36	Passenger
248625000	5694.49	15.2	25.7546	-77.0953	162.02	1430	2019-11-21 00:40:34	Tanker			311000223	61212.8	8.9	25.7008	-77.7125	259.364	10	2020-07-01 03:13:23	Tanker
538005795	506.346	15.8	25.7992	-77.1112	159.504	1661	2019-11-21 01:40:21	Cargo			538006488	464.09	13	25.7993	-77.1134	185.678	2658	2020-07-10 07:22:12	Tanker
211839000	493.664	15.8	25.7997	-77.1103	148.125	2323	2019-11-21 01:40:34	Cargo			341295000	5174.83	11.9	25.7632	-77.0867	149.529	2479	2020-07-16 09:02:02	Cargo
538006703	2713.91	16.8	25.7834	-77.0973	144.905	1766	2019-11-21 09:11:43	Cargo			312283000	1456.4	12.8	25.7903	-77.1141	184.421	4116	2020-07-21 16:29:17	Tanker
636018646	2605.02	16.8	25.782	-77.1023	155.828	1971	2019-11-21 09:12:43	Tanker			636016430	1647.78	10.9	25.805	-77.0966	84.0212	1384	2020-07-01 07:05:01	Cargo
355870000	32727.2	8.3	25.5618	-77.3005	215.011	1	2019-11-21 06:28:32	Cargo			563089700	3187.79	11.1	25.7756	-77.1211	194.712	273	2020-07-01 14:53:03	Tanker
354215000	2678.67	16.8	25.7831	-77.0986	147.547	4159	2019-11-21 09:12:00	Passenger			431048000	64911.5	8.4	25.8021	-77.7602	270.01	13	2020-07-01 03:59:03	Tanker
636016436	2659.02	16.9	25.7795	-77.1114	176.642	916	2019-11-21 09:14:31	Cargo			339857000	183615	0	26.5301	-78.7636	296.49	3	2020-07-01 03:18:29	Pleasure Craft
576532000	2764.53	9.7	25.8249	-77.1271	329.275	1246	2019-11-29 09:31:41	Cargo			367327850	171205	11.5	26.1773	-78.7721	284.436	1	2020-07-01 03:18:41	Pleasure Craft
319573000	8450.96	17.3	25.7274	-77.1059	175.221	493	2019-11-21 10:58:22	Pleasure Craft			636016731	4102.1	8.8	25.7969	-77.0727	100.187	775	2020-07-01 04:02:02	Tanker
311805000	1764.78	13	25.7875	-77.1132	180.778	1117	2019-11-21 14:58:50	Passenger			357988000	1713.08	18.4	25.79	-77.1044	150.221	1821	2020-07-02 12:08:41	Cargo
563032100	1743.6	13	25.7878	-77.1111	173.782	1843	2019-11-21 14:58:20	Tanker			566414000	5407.07	8.8	25.7613	-77.0857	149.799	57	2020-07-01 03:46:41	Tanker
548754000	1740.74	21.2	25.7877	-77.1132	180.68	1617	2019-11-21 17:33:43	Cargo			377901111	3147.1	12	25.7779	-77.0991	153.98	5580	2020-07-17 19:39:23	Cargo
310657000	2079.92	21.4	25.787	-77.123	208.747	3276	2019-11-21 17:35:13	Tanker			257072360	3484.97	13	25.7738	-77.1012	160.364	1270	2020-07-01 13:30:14	Cargo
319089900	29961.9	12.7	25.8292	-77.4104	275.57	5	2019-11-21 16:16:11	Pleasure Craft			477252300	3799.73	13	25.7753	-77.0913	145.305	635	2020-07-01 13:32:43	Tanker
538007349	1835.66	21.2	25.7884	-77.1054	155.635	1304	2019-11-21 17:32:31	Cargo			311263000	7245.55	13.7	25.7409	-77.092	163.219	8	2020-07-20 00:55:33	Passenger
577403000	287.774	1.6	25.8009	-77.1131	183.849	930	2019-11-23 01:57:21	Cargo			371861000	3687.15	13.1	25.7749	-77.0941	149.284	46	2020-07-01 13:32:03	Passenger
240715000	5477.7	8.8	25.8474	-77.1379	332.987	2184	2019-11-21 21:32:18	Tanker			636019385	4251.18	8.8	25.7828	-77.0772	122.697	822	2020-07-01 03:56:02	Tanker
563082400	2198.41	16.4	25.7852	-77.1214	202.679	3762	2019-11-30 22:15:43	Tanker			308045000	488.275	9.9	25.8068	-77.1098	40.7718	13585	2020-07-20 05:40:36	Passenger
257615000	175.536	16.1	25.8046	-77.1117	43.484	1973	2019-11-22 00:04:13	Cargo			229857000	980.162	9.9	25.8111	-77.108	30.084	7610	2020-07-20 05:38:56	Passenger
374171000	126.534	16.2	25.8043	-77.1121	40.3588	1749	2019-11-22 00:04:07	Cargo			354215000	5023.2	7.8	25.8127	-77.0639	78.1815	767	2020-07-08 05:06:55	Passenger
256377000	129.78	16.4	25.8029	-77.1141	242.607	1746	2019-11-22 00:03:37	Tanker			262006000	5262.47	8.8	25.7633	-77.0849	147.888	266	2020-07-01 03:47:33	Cargo
636016400	36.2881	16.3	25.8035	-77.1133	275.284	1875	2019-11-22 00:03:49	Tanker			311361000	11523.2	2.5	25.807	-77.2278	272.004	12	2020-07-20 00:56:59	Passenger
305172000	6842.3	10.9	25.7417	-77.112	179.236	1441	2019-11-22 06:44:59	Cargo			538005443	43141.1	5.2	25.8047	-77.5431	270.277	2	2020-07-01 03:40:06	Tanker
367544720	7040.67	9.8	25.8644	-77.1328	343.705	231	2019-11-30 01:37:28	Tug			311000619	5433.9	8.7	25.761	-77.0858	150.115	318	2020-07-01 03:46:33	Tug
238008000	6107.31	18.8	25.7483	-77.1126	179.637	1234	2019-11-22 08:01:13	Tanker			311000616	4151.58	8.8	25.7909	-77.0739	109.64	25	2020-07-01 03:59:32	Tug
314148000	4903.99	11.4	25.8392	-77.1418	324.045	1440	2019-11-22 09:40:17	Cargo			311427000	3667.7	13.1	25.7748	-77.0946	150.058	6620	2020-07-01 13:31:53	Passenger
249973000	4940.16	10.5	25.8374	-77.1449	319.787	2231	2019-11-22 09:41:26	Passenger			636018023	4941.92	8.9	25.8103	-77.0643	81.0455	80	2020-07-01 04:08:22	Cargo
563064300	4984.86	11	25.8367	-77.1464	317.878	802	2019-11-22 09:41:57	NA			720958000	30669.5	8.8	26.0584	-76.9935	22.8186	11	2020-07-01 05:54:22	Passenger
538006888	4140.5	21.3	25.7749	-77.0863	139.984	1471	2019-11-22 12:56:17	Special Craft			565526000	49271.8	12.6	25.9459	-77.5787	288.875	10	2020-07-01 11:07:47	Tanker
256889000	6128.84	18.5	25.7586	-77.1488	215.78	346	2019-11-22 13:59:14	Cargo			477214700	18257.9	13.2	25.8386	-76.9351	77.5712	48	2020-07-01 14:15:04	Cargo
636018113	4166.7	13.5	25.7674	-77.101	163.368	1415	2019-11-22 23:14:27	Tanker			235009420	129797	0	25.7864	-78.407	269.442	10	2020-07-01 06:11:26	Tanker
372914000	573.8	9.5	25.8039	-77.1186	275.18	999	2019-11-23 05:15:04	Cargo			255806153	138382	0.3	26.2168	-78.4174	289.706	2	2020-07-01 04:33:05	Passenger
567468000	4010.01	13.6	25.7673	-77.1121	178.796	1431	2019-11-22 23:11:47	Cargo			339694000	11538.8	8.6	25.8861	-77.0429	37.3366	25	2020-07-01 04:40:32	Pleasure Craft
255805669	584.004	15.1	25.8006	-77.1081	123.279	1665	2019-11-23 01:56:15	NA			373022000	175817	0.1	26.3118	-78.7773	289.141	3	2020-07-01 04:40:40	Special Craft
354842000	4084.09	19.4	25.7666	-77.1106	176.656	798	2019-11-23 01:18:08	Passenger			215460000	3605.1	14.6	25.7734	-77.1267	202.459	62	2020-07-02 23:11:08	Tanker
563072100	4098.99	19.4	25.7666	-77.1165	185.011	331	2019-11-23 01:17:08	Tanker			372804000	1330.56	16.3	25.7914	-77.1128	179.586	3308	2020-07-23 17:54:52	Cargo
351109000	302.083	14.6	25.8008	-77.1122	166.152	1946	2019-11-23 01:57:09	Cargo			311000660	3434.84	10.9	25.779	-77.0919	142.236	3479	2020-07-25 00:45:17	Passenger
339300720	2514.03	15	25.8019	-77.138	266.008	24	2019-11-23 02:02:45	Pleasure Craft			305134000	5000.59	17.8	25.7595	-77.1244	193.264	2061	2020-07-17 11:46:38	Cargo
403526001	603.652	9.8	25.8031	-77.1189	266.298	2340	2019-11-23 05:14:43	Cargo			305007000	314.486	9.9	25.8051	-77.1104	54.932	4215	2020-07-20 05:41:16	Cargo
246244000	785.683	9.1	25.8097	-77.1166	332.675	1163	2019-11-23 05:17:22	Cargo			259777000	17685.9	8.6	25.9425	-77.0262	29.2749	14	2020-07-01 05:05:02	Tanker
538005167	945.326	9.5	25.7986	-77.1207	235.054	4193	2019-11-23 05:12:54	Tanker			378112685	252482	14.5	25.1484	-79.5179	253.73	1	2020-07-01 04:56:01	Tug
233092000	6640.07	16.7	25.7445	-77.125	190.472	324	2019-11-23 10:20:35	NA			538008046	2410.95	10.5	25.8114	-77.1353	291.429	1259	2020-07-02 01:23:02	Tanker
636018604	6686.29	16.7	25.7432	-77.1163	182.886	938	2019-11-23 10:22:18	Tanker			210057000	2438.56	13.4	25.7814	-77.1129	180.016	5081	2020-07-05 02:07:49	Cargo
308322000	7582.4	12.8	25.7353	-77.1057	174.562	1348	2019-11-23 12:17:03	Passenger			373324000	160696	15.5	26.0952	-78.6846	282.008	3	2020-07-01 05:18:22	Special Craft
636015050	4703.73	18.7	25.8068	-77.0662	85.4557	1587	2019-11-29 02:06:17	Tanker			354895000	2205.55	16.6	25.7845	-77.1061	161.838	564	2020-07-14 23:15:26	Tanker
538080029	5833.89	9.9	25.7562	-77.0874	154.03	247	2019-11-23 14:58:53	Pleasure Craft			259917000	2057.32	18.4	25.7883	-77.1249	215.382	2584	2020-07-02 12:05:05	Cargo
477900400	3631.08	8.2	25.81	-77.1484	281.597	1011	2019-11-23 22:54:51	Cargo			248152000	3250	14.8	25.7748	-77.1198	192.094	1724	2020-07-18 03:23:25	Tanker
228337900	3635.14	8.1	25.8119	-77.148	284.948	1476	2019-11-23 22:54:01	Cargo			319619000	67325.8	5.2	25.8859	-77.7783	277.987	2	2020-07-01 06:16:16	Pleasure Craft
538005999	5183.72	18.7	25.7632	-77.1394	210.66	38	2019-11-24 02:00:36	Special Craft			355789000	14861.1	12.3	25.6719	-77.1422	191.325	14	2020-07-26 18:19:27	Tanker
319107900	3896.79	12	25.7702	-77.1001	160.831	2204	2019-11-29 03:56:50	Pleasure Craft			563495000	3186.92	11	25.7768	-77.1249	202.037	1590	2020-07-01 14:54:14	Cargo
636013350	7728.22	21.6	25.7342	-77.1222	186.902	951	2019-11-24 04:44:39	Tanker			219208000	26108.1	8.8	26.0179	-77.005	24.3234	2	2020-07-01 05:37:21	Cargo
339777000	2111.79	10.2	25.8225	-77.1133	359.16	836	2019-11-24 04:56:13	Pleasure Craft			319653000	3007.64	11	25.8215	-77.0906	48.0739	1603	2020-07-01 06:59:21	Cargo
636017972	5555.28	14	25.754	-77.1036	170.374	1263	2019-11-24 12:11:07	NA			378112306	24844.4	10.9	26.0115	-77.0204	21.7845	10	2020-07-01 05:54:31	Tug
563367000	1529.79	17.5	25.7901	-77.109	164.974	1051	2019-11-24 12:31:26	Tanker			577016000	53425.6	12.5	25.9709	-77.6129	290.532	11	2020-07-01 11:19:07	Tug
319153100	34684.1	15.3	25.8441	-77.4559	277.576	167	2019-11-24 14:26:55	Pleasure Craft			311000617	31891.7	12.3	25.8135	-77.4308	272.082	3	2020-07-27 02:48:53	Tug
636018142	8449.36	11.5	25.7502	-77.0526	134.409	1722	2019-11-24 19:36:58	Cargo			378390000	141058	0.6	26.2933	-78.414	293.022	1	2020-07-01 05:56:03	Tug
366479000	8338.09	11.5	25.7496	-77.0548	135.784	1924	2019-11-24 19:37:37	Cargo			563076300	40610.2	13	25.8358	-77.5164	275.185	8	2020-07-01 11:41:54	Cargo
319070500	9175.98	11.3	25.7533	-77.0402	127.426	1691	2019-11-24 19:33:18	Tanker			220407000	18980.7	12.8	25.6631	-77.2214	214.871	593	2020-07-25 09:11:36	Tanker
564837000	2141.4	18.8	25.7869	-77.1019	149.096	1826	2019-11-24 20:03:24	Cargo			308438000	176119	0.2	26.3117	-78.7806	289.106	1	2020-07-01 06:19:51	Cargo
636018964	2130.81	18.9	25.7884	-77.0997	141.534	2132	2019-11-24 20:03:54	Cargo			377906000	139.603	7.8	25.8046	-77.1135	338.306	2683	2020-07-28 02:45:58	Cargo
477684200	2132.29	18.8	25.7878	-77.1005	144.435	1918	2019-11-24 20:03:42	Cargo			518630000	442.168	9.9	25.8063	-77.1099	43.485	485	2020-07-20 05:40:46	Cargo
229673000	4194.59	20	25.7667	-77.1232	194.163	1845	2019-11-25 00:07:34	Tanker			338619000	1728.88	10.9	25.8065	-77.096	78.7286	356	2020-07-01 07:04:31	Cargo
319040000	2634.36	9.3	25.826	-77.1214	341.406	258	2019-11-29 09:33:41	Pleasure Craft			305302000	129796	0	25.7863	-78.407	269.44	4	2020-07-01 07:58:38	Cargo
229378000	4198.06	20	25.7665	-77.122	192.487	1111	2019-11-25 00:07:22	Passenger			312491000	1745.33	10.3	25.7902	-77.1224	212.587	1682	2020-07-24 18:01:45	Tanker
538007758	458.235	8	25.8071	-77.1152	330.774	1201	2019-11-25 03:54:52	Cargo			538005057	3977.58	9.3	25.8338	-77.1342	327.723	1901	2020-07-27 05:32:31	Cargo
373178000	4827.72	16.3	25.7616	-77.0996	164.027	1345	2019-11-25 00:59:40	Passenger			538005007	2437.95	13.4	25.7814	-77.1137	181.814	2674	2020-07-05 02:07:38	Tanker
477099600	384.203	8.1	25.804	-77.1167	278.419	1882	2019-11-25 03:53:21	Tanker			311315000	10206.7	13.9	25.7361	-77.1824	222.878	36	2020-07-20 01:16:54	Passenger
636092275	2686.05	8	25.7843	-77.1294	217.766	1144	2019-11-25 03:43:12	Cargo			248716000	128881	13.4	26.0843	-75.8643	75.6846	1	2020-07-01 09:52:48	Tanker
636018668	964.784	8	25.7981	-77.1206	232.266	1105	2019-11-25 03:50:21	Tanker			477390300	10669.2	10.6	25.7961	-77.0069	94.3898	67	2020-07-01 17:12:28	Cargo
257323000	5663.83	14.4	25.7524	-77.1154	182.471	994	2019-11-25 09:21:37	Cargo			377901104	535.859	12.3	25.7995	-77.1099	145.17	11134	2020-07-25 20:56:06	Cargo
305717000	5654.78	14.4	25.7524	-77.1108	177.799	1845	2019-11-25 09:22:30	Cargo			636018545	73978.6	12.5	25.9308	-77.8375	281.211	2	2020-07-01 10:15:23	Tanker
319107400	5698.57	14.3	25.7523	-77.1189	186.02	932	2019-11-25 09:20:48	Pleasure Craft			355833000	411.178	9.8	25.7998	-77.1122	169.897	14560	2020-07-20 05:43:16	Passenger
477462400	3291.42	13.7	25.7739	-77.1166	186.394	1784	2019-11-25 15:44:00	Cargo			351468000	686.989	7.1	25.8057	-77.1193	291.266	2994	2020-07-23 14:50:54	Special Craft
563013900	5710.05	14.3	25.7523	-77.1198	186.898	1205	2019-11-25 09:20:37	Cargo			563076200	45246.6	12.6	25.9217	-77.545	287.019	5	2020-07-01 10:56:48	Cargo
311536000	3269.08	13.7	25.7739	-77.113	180.114	1903	2019-11-25 15:43:10	Passenger			369813000	5183.61	10.6	25.761	-77.0911	155.116	827	2020-07-01 17:41:07	Cargo
308457000	2185.21	16.7	25.7842	-77.1082	167.403	2650	2019-11-26 13:53:17	Passenger			304941000	2439.51	10.7	25.8129	-77.1349	295.554	2839	2020-07-02 19:58:02	Cargo
563056500	1715.31	9.9	25.7881	-77.1156	188.856	1283	2019-11-25 17:06:02	Cargo			319153600	2400.26	10.5	25.8104	-77.1356	288.861	824	2020-07-02 01:22:43	Cargo
538003015	1719.05	10	25.788	-77.114	183.566	1304	2019-11-25 17:05:32	Cargo			518100304	5190.48	10.6	25.7598	-77.0941	158.718	32	2020-07-01 17:42:08	Pleasure Craft
241613000	2885.5	10.7	25.8104	-77.1407	285.605	1324	2019-11-26 01:35:26	Tanker			311109000	39686.4	13	25.833	-77.5074	274.839	1	2020-07-01 11:44:15	Passenger
356362000	3645.44	12.3	25.7709	-77.1184	188.601	1802	2019-11-25 21:48:05	Cargo			369225000	4577.67	12.9	25.781	-77.0746	123.08	9	2020-07-01 13:37:13	Tanker
636017642	3606.7	12.4	25.7721	-77.1226	195.543	1508	2019-11-25 21:49:15	NA			255806062	3708.88	12.9	25.7709	-77.1216	193.467	1	2020-07-01 13:25:04	Cargo
564364000	3630.19	12.4	25.7735	-77.1276	203.759	824	2019-11-25 21:50:35	NA			566781000	5641.92	13.2	25.7745	-77.1593	235.294	198	2020-07-01 15:27:07	Cargo
248148000	3623.08	12.5	25.7733	-77.127	202.849	1716	2019-11-25 21:50:27	Tanker			367491360	1171.55	7.9	25.7936	-77.1171	200.961	2603	2020-07-28 02:40:38	Pleasure Craft
239962000	2344.43	8.3	25.8245	-77.1151	354.736	1308	2019-11-26 04:57:51	Tanker			367799380	38351.7	13	25.8484	-77.4922	277.576	11	2020-07-02 04:41:34	Cargo
538008021	16457.2	8.8	25.9452	-77.0637	17.3391	59	2019-11-26 04:03:31	Cargo			305276000	20542.3	11.6	25.7602	-77.3121	256.486	856	2020-07-02 05:56:58	Cargo
538008097	2355.22	8.3	25.8247	-77.1134	358.851	1218	2019-11-26 04:57:12	Tanker			319089900	22854.9	11.5	25.7672	-77.3373	259.876	159	2020-07-02 05:49:37	Pleasure Craft
374195000	4757.29	13.3	25.7605	-77.1134	180.523	1296	2019-11-26 08:19:04	Cargo			355981000	1132.58	6.5	25.7992	-77.1232	245.144	1663	2020-07-07 16:51:46	Cargo
636018038	56192.6	9.2	25.8808	-77.6669	278.937	2	2019-11-26 06:44:53	Cargo			372089000	10730.7	5.1	25.7282	-77.1802	218.853	267	2020-07-03 01:22:14	Special Craft
353706000	5024.03	13.2	25.7609	-77.1304	200.327	1736	2019-11-26 08:14:53	Cargo			354455000	37539.1	4.6	25.7926	-77.4871	268.246	2	2020-07-02 06:34:41	Cargo
367480180	16887.1	12.9	25.7938	-76.9449	93.6173	3	2019-11-29 03:37:44	Pleasure Craft			229571000	2634.47	13	25.7814	-77.1031	158.169	1026	2020-07-02 10:00:20	NA
369344000	4858.3	13.3	25.7608	-77.1242	193.377	1217	2019-11-26 08:16:23	Cargo			563029500	1614.63	14.3	25.7891	-77.1102	170.326	2253	2020-07-24 23:08:20	Tanker
319173000	5067.37	13.2	25.761	-77.1317	201.656	904	2019-11-26 08:14:33	Pleasure Craft			538003882	1572.3	18.5	25.7893	-77.1118	175.957	963	2020-07-02 12:07:23	Tanker
229617000	10683.7	17.2	25.7167	-77.1594	205.759	632	2019-11-26 10:36:25	Pleasure Craft			538004534	3545.57	13.1	25.7813	-77.1385	226.185	464	2020-07-02 10:09:10	Tanker
538071410	39701.7	9.2	25.8252	-77.5081	273.583	4	2019-11-26 11:20:29	Passenger			377913000	1743	18.4	25.7888	-77.1192	200.963	6127	2020-07-02 12:06:05	Cargo
636018346	3272.72	16.6	25.7926	-77.0826	111.533	1806	2019-11-26 13:47:59	Cargo			636012659	2511.28	13	25.7813	-77.1185	192.655	648	2020-07-02 10:04:10	Tanker
357315000	2172.84	16.7	25.7855	-77.1043	156.553	1604	2019-11-26 13:52:29	Tanker			241570000	2312.71	18.2	25.7923	-77.0934	122.356	866	2020-07-02 12:10:41	Tanker
636016731	4277.44	14.7	25.765	-77.109	174.776	1298	2019-11-29 19:40:33	Tanker			319093800	1697.04	18.4	25.7888	-77.1181	197.507	445	2020-07-02 12:06:17	Tanker
258028000	3124.76	16.6	25.778	-77.0995	154.557	1320	2019-11-27 01:24:05	Tanker			477399300	839.911	9.8	25.7959	-77.1137	185.329	1930	2020-07-20 05:44:46	Tanker
538002113	3134.11	16.6	25.7788	-77.0976	150.654	1140	2019-11-27 01:24:30	Cargo			538006978	1874.03	12.8	25.7867	-77.1101	171.243	1321	2020-07-02 17:12:35	Tanker
371040000	553.52	10.9	25.8084	-77.1124	5.26932	2983	2019-11-27 02:05:15	Cargo			563101000	2477.48	10.6	25.8143	-77.1345	299.318	842	2020-07-02 19:57:32	NA
319036500	12274.7	16.8	25.7426	-77.2152	236.591	1	2019-11-27 00:59:48	Pleasure Craft			248604000	7103.8	10.7	25.8675	-77.1159	357.595	26	2020-07-02 19:39:12	Tanker
477854400	1978.26	16.2	25.7871	-77.1049	156.104	2728	2019-11-30 22:12:24	Tanker			215307000	2418.58	11	25.7823	-77.1071	166.131	900	2020-07-02 21:49:27	Tanker
312961000	6138.36	12	25.7524	-77.1367	202.708	3	2019-11-29 03:45:39	Cargo			373959000	699.038	9.9	25.7971	-77.1132	182.238	5318	2020-07-20 05:44:17	Cargo
566179000	285.974	10.8	25.806	-77.1133	353.585	948	2019-11-27 02:06:05	Tanker			538004981	4410.56	11.1	25.764	-77.1188	187.549	2534	2020-07-03 03:18:38	Tanker
538007805	2048.84	8.6	25.7877	-77.1022	148.35	947	2019-11-28 03:17:33	Cargo			477318400	4856.35	10.9	25.8292	-77.1522	306.096	1724	2020-07-03 03:39:51	Cargo
538002748	1579.37	11.5	25.7899	-77.1177	197.43	2385	2019-11-27 13:54:46	Cargo			248089000	10287.1	10.7	25.8961	-77.1199	356.16	63	2020-07-03 03:15:19	Cargo
258975000	12003.2	11.2	25.9009	-77.0605	25.8191	24	2019-11-27 07:28:02	Cargo			373656000	5265.52	10.6	25.8247	-77.1599	296.713	655	2020-07-03 03:42:37	Cargo
372050000	4862.42	18.7	25.8097	-77.0649	81.7521	85	2019-11-29 02:06:53	Cargo			319155500	6115.24	14.1	25.7483	-77.1093	176.608	52	2020-07-08 03:27:48	Pleasure Craft
241458000	1618.39	8.3	25.7969	-77.0985	116.827	1228	2019-11-28 03:21:43	Tanker			636019071	10656.1	11	25.8171	-77.2181	278.211	918	2020-07-03 04:00:10	Tanker
563083600	1434.12	11.4	25.7905	-77.113	180.161	1427	2019-11-27 13:56:08	Tanker			671056100	15045.5	10.9	25.7906	-77.2623	264.576	603	2020-07-03 04:01:58	Special Craft
338090687	62279.1	19.2	25.9885	-77.6998	289.444	1	2019-11-27 06:44:19	Pleasure Craft			373519000	7887.45	17.9	25.7824	-77.1881	252.707	935	2020-07-03 10:23:52	Special Craft
636015422	6172.94	10.9	25.7795	-77.0573	115.522	56	2019-11-27 08:32:19	Cargo			309697000	3431.58	14.8	25.7726	-77.11	175.119	11726	2020-07-18 03:21:12	Passenger
311000760	5341.56	20.3	25.7584	-77.1319	200.778	56	2019-11-29 01:43:08	Tanker			367768540	66175.7	12.6	25.9496	-77.7532	284.375	1	2020-07-03 06:20:13	Pleasure Craft
636016430	3366.37	12.5	25.7731	-77.1123	178.97	863	2019-11-27 14:50:30	Cargo			311000117	4832.93	17.8	25.7633	-77.1319	203.014	830	2020-07-03 10:34:46	Cargo
538004412	4060.79	18.3	25.7967	-77.1528	259.412	2029	2019-11-28 13:21:12	Cargo			308329000	19278.8	11.7	25.736	-77.2901	247.141	638	2020-07-03 12:00:07	Tanker
339859000	1845.59	11.3	25.7924	-77.0991	131.604	394	2019-11-27 14:00:07	Pleasure Craft			319069900	28126.4	11.8	25.7713	-77.3911	262.747	2	2020-07-03 12:31:38	Pleasure Craft
538002476	2971.4	10	25.8237	-77.1324	319.13	368	2019-11-29 09:29:52	NA			304906000	1523.79	18.6	25.8137	-77.1028	41.4985	2484	2020-07-17 03:54:15	Cargo
319597000	3227.41	12.5	25.7754	-77.1215	195.307	44	2019-11-27 14:53:00	Pleasure Craft			538007678	12687.5	10.2	25.7687	-77.2335	252.285	1002	2020-07-03 17:42:04	Tanker
367353090	32333.7	14.1	25.8013	-77.4354	269.639	6	2019-11-28 04:59:40	Tanker			538002743	10470.3	12.5	25.7633	-77.2074	244.76	1037	2020-07-03 18:31:50	Cargo
246460000	21789.7	15.7	25.804	-77.3302	270.207	40	2019-11-28 00:07:59	Cargo			255806038	10692.1	12.5	25.7643	-77.2104	245.971	836	2020-07-03 18:31:01	Cargo
367659990	16962	19.1	25.707	-77.2443	230.834	1	2019-11-27 08:17:13	Special Craft			309374000	1261.6	7.1	25.8148	-77.1134	358.126	4443	2020-07-23 14:56:13	Passenger
311000618	4829.52	12.9	25.7984	-77.1608	263.395	398	2019-11-29 10:16:03	Tug			636018882	10987.2	12.6	25.7537	-77.2077	239.791	941	2020-07-03 21:04:10	Tanker
378391000	5348.76	9.8	25.7603	-77.0889	153.321	366	2019-11-30 14:38:40	Tug			247348700	4402.42	8.1	25.7655	-77.126	197.202	1697	2020-07-03 21:39:44	Cargo
378112306	6220.07	10.9	25.7859	-77.054	108.254	185	2019-11-27 08:29:59	Tug			255806319	4550.29	8.1	25.7685	-77.1367	211.506	641	2020-07-03 21:44:15	Tanker
311000617	7044.72	19	25.7402	-77.1053	173.784	130	2019-11-29 05:03:30	Tug			355663000	4859.76	8.1	25.7709	-77.1455	222.035	1311	2020-07-03 21:47:53	Cargo
636016437	5698.75	19.4	25.7533	-77.1254	192.567	1582	2019-11-28 06:32:41	Cargo			477728400	4842.52	8.1	25.7708	-77.1451	221.584	1434	2020-07-03 21:47:44	Cargo
357449000	1478.51	15.9	25.7928	-77.1041	143.29	3063	2019-11-29 01:33:53	Tanker			311702000	4510.94	8.1	25.768	-77.1351	209.459	1062	2020-07-03 21:43:33	Tanker
368660000	57900	10.1	26.084	-77.6007	302.713	3	2019-11-27 11:47:01	Cargo			244030000	8506.28	13.1	25.7271	-77.1218	185.934	791	2020-07-04 04:28:54	Cargo
241612000	7460.37	11.8	25.7803	-77.1828	249.782	31	2019-11-27 13:36:08	Tanker			255806154	2224.08	16.6	25.7847	-77.1051	159.431	2937	2020-07-14 23:15:15	Tanker
311000328	7575.27	20.5	25.7354	-77.1201	185.373	182	2019-11-30 05:18:19	NA			370375000	1529.67	9.2	25.8026	-77.0977	93.7334	4050	2020-07-15 05:24:02	Cargo
319028100	6037.83	12	25.7529	-77.1355	201.935	2	2019-11-29 03:46:00	Pleasure Craft			248579000	2999.7	4.1	25.7766	-77.1089	172.272	2640	2020-07-19 21:57:48	Tanker
353934000	17542.5	11.6	25.8216	-76.9391	83.3551	12	2019-11-27 14:45:47	Cargo			311000346	5979.12	18.2	25.7505	-77.1248	191.383	528	2020-07-04 11:02:49	Tanker
720958000	6955.26	16.6	25.7489	-77.0786	150.456	108	2019-11-29 15:21:59	Passenger			577349000	159.511	7.9	25.8025	-77.1142	230.045	652	2020-07-28 02:44:58	Passenger
353289000	44568.1	11.9	25.911	-77.5414	285.688	3	2019-11-27 16:54:08	Cargo			377901123	819.738	13.5	25.7967	-77.1096	155.745	2887	2020-07-18 15:44:26	Cargo
319171700	69222.5	14.5	25.9771	-77.7765	286.361	2	2019-11-27 19:48:05	Pleasure Craft			377907000	528.961	12.3	25.7992	-77.1105	152.066	1510	2020-07-25 20:56:16	Cargo
241415000	5393.99	9.1	25.8404	-77.1479	319.602	40	2019-11-28 00:44:39	Tanker			636017973	2571.46	2.4	25.7808	-77.1187	192.985	890	2020-07-04 15:15:42	Cargo
636015956	4458.88	15.9	25.7642	-77.123	192.965	38	2019-11-27 21:16:54	Tanker			371475000	2572.25	2.4	25.7809	-77.119	193.59	1093	2020-07-04 15:16:04	Cargo
368413000	11443	12.6	25.7335	-77.1968	227.205	138	2019-11-27 21:47:29	Tug			371705000	2572.51	2.4	25.7809	-77.1192	194.123	6270	2020-07-04 15:16:24	Special Craft
538005148	5419.32	9.2	25.8393	-77.1498	317.237	12	2019-11-28 00:45:28	Cargo			538003668	2598.23	2.4	25.7815	-77.122	200.441	301	2020-07-04 15:20:13	Passenger
311000710	745.435	18.2	25.8005	-77.1063	116.173	3356	2019-11-28 13:12:55	Passenger			249998000	2585.42	2.4	25.7803	-77.1161	186.997	941	2020-07-04 15:12:03	Tanker
368199000	9369.33	7.8	25.8251	-77.2033	284.908	14	2019-11-28 01:06:59	Tanker			576532000	2884.57	13.2	25.7788	-77.1035	160.966	950	2020-07-05 18:19:13	Cargo
367496470	34436.5	12	25.7883	-77.4559	267.274	14	2019-11-27 22:57:00	Tug			241510000	16507.3	12.1	25.7444	-76.9618	113.415	973	2020-07-05 01:03:45	Tanker
356963000	15519.7	15	25.6635	-77.1068	177.729	9	2019-11-28 01:43:30	Cargo			538070582	4512.03	15.2	25.7632	-77.1198	188.771	274	2020-07-27 17:20:01	Pleasure Craft
367746790	59348.8	7.9	25.8472	-77.7029	274.839	1	2019-11-28 00:44:17	Pleasure Craft			314444000	16611.5	12.1	25.7445	-76.9607	113.22	384	2020-07-05 01:03:25	Tanker
338318656	55743.5	12.2	25.9034	-77.658	281.635	1	2019-11-28 00:47:51	Pleasure Craft			636018722	2434	13.3	25.7824	-77.106	163.35	977	2020-07-05 05:52:16	Tanker
636017335	43095.7	12.1	25.6957	-77.5257	253.932	2	2019-11-28 01:59:31	Tanker			538008060	2441.37	13.4	25.7834	-77.1028	155.452	869	2020-07-05 05:51:26	Cargo
538005113	5238.77	9.8	25.7573	-77.1014	167.259	210	2019-11-30 14:34:21	Cargo			538004030	2660.36	13.2	25.7795	-77.1151	184.568	2905	2020-07-05 05:54:36	Tanker
241132000	5919.98	6.6	25.8221	-77.1682	290.595	1487	2019-11-28 10:04:35	Tanker			247301100	7266.44	15.9	25.738	-77.1185	184.386	629	2020-07-05 07:28:31	Tanker
338350291	56282.3	18.6	25.8732	-77.669	278.059	2	2019-11-28 04:56:48	Pleasure Craft			310652000	2751.21	7.6	25.8275	-77.1061	14.2943	2597	2020-07-28 02:57:10	Tanker
312491000	11225.5	8.6	25.7724	-77.0064	107.924	25	2019-11-29 03:45:21	Tanker			312794000	1373.2	11.4	25.7973	-77.101	119.727	4126	2020-07-06 14:23:26	Tanker
310707000	6725.68	18.9	25.7443	-77.1281	192.978	996	2019-11-28 07:33:12	Tanker			548765000	11360	10.6	25.7077	-77.0723	159.047	464	2020-07-05 10:01:16	Tanker
636018914	412.172	18.3	25.7999	-77.1116	161.439	2228	2019-11-28 13:13:55	Cargo			311035500	10154.3	10.7	25.7137	-77.1333	191.531	1010	2020-07-05 10:19:55	Tanker
249266000	662.107	18.2	25.8004	-77.1073	121.214	2095	2019-11-28 13:13:06	Tanker			319282000	6931.09	14.2	25.7461	-77.0854	156.647	1442	2020-07-05 13:57:03	Tanker
219190000	5224.62	20.4	25.7565	-77.1082	174.858	1405	2019-11-29 01:39:20	Tanker			255805689	8762.76	8.9	25.8773	-77.0815	20.9421	500	2020-07-05 14:29:24	Cargo
311003400	12069.9	18.9	25.6972	-77.0861	167.163	1	2019-11-28 08:28:43	Cargo			357411000	3106.04	13.2	25.7822	-77.0927	139.333	1888	2020-07-05 18:16:23	Cargo
538007573	2203.54	18.3	25.7983	-77.1342	254.84	179	2019-11-28 13:17:55	Cargo			477351300	3156.99	13.2	25.7826	-77.0914	137.03	773	2020-07-05 18:16:04	Tanker
311054900	9432.61	16	25.7202	-77.0934	168.048	2	2019-11-28 10:46:21	Cargo			229719000	3336.82	13.3	25.7839	-77.0877	130.675	401	2020-07-05 18:15:04	Tanker
416481000	12748.3	15.9	25.7246	-77.0204	133.404	5	2019-11-28 11:01:15	Cargo			257069560	2884.95	13.2	25.7786	-77.1042	162.425	793	2020-07-05 18:19:23	Tanker
371154000	4500.98	17.8	25.7629	-77.1162	184.159	2605	2019-11-29 06:52:46	Passenger			636014191	5027.92	12.6	25.7928	-77.1617	256.411	1137	2020-07-05 21:07:35	Tanker
371851000	2209.02	18.3	25.7847	-77.1054	160.15	640	2019-11-29 01:51:43	Cargo			477224700	1138.79	11.9	25.794	-77.1173	202.49	1258	2020-07-05 21:19:24	Cargo
538003617	26715.6	15.8	25.8332	-77.3773	277.172	4	2019-11-28 12:12:13	Tanker			374375000	1869.55	12	25.7923	-77.127	228.651	1953	2020-07-05 21:16:45	Tanker
367602990	7991.44	18	25.8077	-77.0334	86.5466	30	2019-11-28 12:59:42	Pleasure Craft			538008722	1666.06	11.9	25.7927	-77.1245	224.063	1187	2020-07-05 21:17:25	Tanker
241510000	5389.8	12.7	25.7997	-77.0594	94.4569	53	2019-11-29 02:32:02	Tanker			271042868	5224.02	12.6	25.793	-77.1637	257.175	1135	2020-07-05 21:07:04	Cargo
563353000	6366.46	15.8	25.7462	-77.119	185.428	1612	2019-11-28 23:56:28	Tanker			636016478	3686.32	13.4	25.7709	-77.1054	168.221	838	2020-07-06 05:22:06	Cargo
671103100	29436.3	11.7	25.7541	-77.4013	259.296	309	2019-11-28 16:59:13	Cargo			215069000	3696.36	13.4	25.7703	-77.1088	173.522	479	2020-07-06 05:22:56	Cargo
538005779	5890.46	14.7	25.7701	-77.1587	230.974	1158	2019-11-28 23:26:41	Tanker			367482960	10266.5	13	25.7252	-77.1679	212.328	376	2020-07-08 01:30:04	Unspecified
367005250	1381.89	12.9	25.7912	-77.1155	190.645	1006	2019-11-29 02:17:22	Tug			244830812	23393.9	13.1	25.8101	-77.3461	271.863	31	2020-07-06 06:22:25	Special Craft
636016529	1440.41	15.8	25.7962	-77.101	124.006	1689	2019-11-29 01:34:53	Cargo			354711000	24076.9	9	25.8329	-77.3508	277.874	1071	2020-07-06 10:56:22	Cargo
564644000	2154.44	18.3	25.7842	-77.1098	171.676	1927	2019-11-29 01:50:55	Tanker			244150212	9859.66	11.1	25.7493	-77.1909	232.356	403	2020-07-06 12:11:45	Cargo
371449000	7911.2	15.8	25.7371	-77.0838	158.44	30	2019-11-29 00:03:58	Cargo			375939000	1331.42	16.2	25.7916	-77.1109	171.354	4815	2020-07-23 17:54:29	Cargo
220221000	4396.81	17.7	25.7649	-77.1235	193.874	1754	2019-11-29 06:51:22	Cargo			355068000	193.241	9.8	25.8028	-77.1111	110.337	4261	2020-07-20 05:42:06	Special Craft
378390000	6953.1	13	25.7407	-77.1158	182.365	34	2019-11-30 00:37:37	Tug			563112000	3283.69	14.1	25.7741	-77.1086	172.417	700	2020-07-06 11:58:34	Tanker
218842000	1347.85	12.9	25.7913	-77.1122	176.897	2369	2019-11-29 02:18:11	NA			245578000	2134.52	11.6	25.8123	-77.094	62.5189	797	2020-07-06 14:18:26	Cargo
319260000	6928.81	11.7	25.7482	-77.1452	207.756	63	2019-11-29 03:43:00	Pleasure Craft			538070454	1634.68	11.1	25.7887	-77.1128	179.547	3	2020-07-06 14:27:56	Pleasure Craft
538080044	9658.67	19.9	25.7173	-77.128	188.953	4	2019-11-29 01:13:33	Pleasure Craft			241662000	1785.16	10.4	25.7875	-77.1155	188.092	1133	2020-07-06 14:28:49	Tanker
566199000	1460.51	15.8	25.7976	-77.0999	116.684	936	2019-11-29 01:35:16	Tanker			308457000	1502.92	11.1	25.7968	-77.0999	119.452	3397	2020-07-22 07:01:39	Passenger
477850200	1415.51	12.8	25.7914	-77.1083	160.855	2377	2019-11-29 02:19:11	Cargo			368105000	6083.31	13.2	25.755	-77.0844	152.085	524	2020-07-06 18:41:55	Tug
636016649	5434.98	16.4	25.8403	-77.0772	41.1394	8	2019-11-29 01:45:53	Cargo			477620700	6079.92	13.2	25.7545	-77.0856	153.295	666	2020-07-06 18:41:36	Cargo
636018693	6927.61	18.9	25.7411	-77.1175	183.778	196	2019-11-29 05:05:37	Cargo			636015522	6079.63	13.2	25.7542	-77.0863	153.997	1017	2020-07-06 18:41:25	Tanker
259847000	1345.85	12.9	25.7913	-77.113	180.072	1098	2019-11-29 02:18:00	NA			304164000	10102	13.6	25.7405	-77.1858	226.169	13	2020-07-06 18:14:36	Cargo
367069280	11121.2	16.6	25.8882	-77.0536	32.1955	3	2019-11-29 01:57:17	Tug			304071000	4693.74	11.2	25.7794	-77.1515	235.337	1731	2020-07-06 23:06:01	NA
566274000	2484.29	13.6	25.7813	-77.1093	171.548	2145	2019-11-29 10:02:41	Cargo			477027400	7683.02	16.3	25.7342	-77.1173	183.226	1353	2020-07-07 00:46:20	Cargo
477004100	2020.12	13	25.7908	-77.1275	226.117	4	2019-11-29 02:14:21	Tanker			241607000	7691.91	16.3	25.7344	-77.1215	186.345	1057	2020-07-07 00:45:31	Tanker
636012382	5986.62	9.8	25.7657	-77.0703	134.527	68	2019-11-30 14:45:10	Tanker			218582000	4229.78	18.3	25.7653	-77.1121	178.795	1134	2020-07-07 10:07:04	NA
209513000	13793.9	18	25.7967	-77.2503	266.912	65	2019-11-29 06:27:29	High Speed Craft			255806059	2023.59	7	25.7868	-77.1046	155.795	1709	2020-07-07 17:55:48	Tanker
368089610	184099	21.1	26.8905	-75.718	48.6808	3	2019-11-29 03:04:20	Pleasure Craft			538003852	660.256	7.1	25.7982	-77.1098	151.78	553	2020-07-07 17:14:27	Tanker
636019574	40682.3	19.2	26.1278	-76.9226	27.7761	1	2019-11-29 03:11:10	Cargo			319031900	20960.1	12.3	25.7801	-77.3203	262.916	5	2020-07-07 13:23:00	Pleasure Craft
244638000	2629.14	9.3	25.8269	-77.1172	350.678	1301	2019-11-29 09:35:11	Cargo			477043500	551.539	7	25.8005	-77.1174	233.107	677	2020-07-07 16:54:37	Tanker
367098330	66092.3	20.8	25.9218	-77.7592	281.641	2	2019-11-29 03:27:15	Tug			636018693	11028.7	11.4	25.7225	-77.177	215.504	590	2020-07-07 21:10:04	Cargo
338152140	26349.9	18.6	25.7206	-77.3592	249.565	20	2019-11-30 07:19:27	Pleasure Craft			538008077	8627.84	12	25.7256	-77.1094	177.649	883	2020-07-07 21:28:44	Tanker
356541000	9402.77	17.7	25.7436	-77.0464	134.938	468	2019-11-29 07:06:10	Cargo			241473000	1455.81	10.9	25.8159	-77.1082	18.8125	766	2020-07-07 22:46:21	Tanker
367001870	8005.97	12.3	25.7442	-77.1586	214.779	45	2019-11-29 03:39:10	Tug			972971556	16757	11.3	25.719	-77.2515	235.933	6	2020-07-07 23:18:57	NA
477700700	2424.38	13.5	25.788	-77.13	224.894	2298	2019-11-29 10:08:03	Cargo			305024000	6901.55	16.3	25.7492	-77.079	150.594	616	2020-07-08 00:12:16	Cargo
636016975	8823.52	12.7	25.7532	-77.1812	230.718	17	2019-11-29 03:31:41	Cargo			431132000	5297.21	16.6	25.7564	-77.1222	190.078	1453	2020-07-08 00:20:53	Tanker
209148000	6214.77	8.7	25.753	-77.1402	205.93	1007	2019-11-30 02:27:24	Cargo			477914200	3019.52	14.4	25.7819	-77.1314	217.623	1142	2020-07-08 01:51:34	Cargo
538071296	7029.11	11.6	25.7477	-77.1463	208.313	74	2019-11-29 03:42:41	Pleasure Craft			636016691	4122.31	7	25.8384	-77.0988	20.0422	4546	2020-07-08 07:07:27	Tanker
241652000	2626.56	9.4	25.8261	-77.1205	343.357	2282	2019-11-29 09:34:00	Cargo			377901119	2328.56	13.4	25.785	-77.1018	151.382	5616	2020-07-24 16:45:04	Cargo
577199000	6526.57	11.9	25.7503	-77.1409	205.374	8	2019-11-29 03:44:20	Special Craft			370269000	4527.06	7.1	25.8418	-77.0975	19.9537	2452	2020-07-08 07:09:15	Special Craft
538071072	61947	19.4	26.3087	-76.8479	25.1757	4	2019-11-29 03:47:05	Pleasure Craft			305152000	7037.41	10.5	25.74	-77.1103	177.852	337	2020-07-08 07:41:15	Cargo
636019413	2479.73	13.5	25.7884	-77.1312	227.5	3504	2019-11-29 10:08:21	Cargo			538005614	3015.63	11.8	25.7762	-77.1119	178.067	3127	2020-07-23 22:54:20	Tanker
538002774	4231.9	14.7	25.7674	-77.099	160.745	1051	2019-11-29 19:38:15	Tanker			538007505	3311.12	10.7	25.7741	-77.1191	190.746	951	2020-07-08 18:03:22	Cargo
210950000	3523.29	12.4	25.7724	-77.1055	167.794	378	2019-11-29 04:20:12	Cargo			636091130	3294.05	10.7	25.7756	-77.1244	200.24	1097	2020-07-08 18:05:01	Cargo
564971000	6064.75	8.5	25.753	-77.0895	157.254	3	2019-11-29 04:18:11	Cargo			370960000	3325.71	10.7	25.7738	-77.1181	188.851	1197	2020-07-08 18:03:02	Cargo
373393000	3865.07	12.4	25.7726	-77.131	207.797	144	2019-11-29 04:26:53	Cargo			538006769	45559.1	10.6	25.7939	-77.5671	268.755	975	2020-07-08 22:17:16	Tanker
369043000	72565.8	17.2	25.9908	-77.8069	286.856	1	2019-11-29 04:37:04	Tanker			538006835	3403.98	10.6	25.7727	-77.1143	182.349	924	2020-07-08 18:01:52	Tanker
209830000	6955.98	18.9	25.7414	-77.1238	188.976	38	2019-11-29 05:06:42	Cargo			577403000	14375.1	12.2	25.6745	-77.1291	186.452	75	2020-07-26 18:15:56	Cargo
367336000	7117.05	19	25.74	-77.1018	171.01	130	2019-11-29 05:02:55	Tug			241586000	14318.4	14.1	25.711	-77.0132	135.82	1104	2020-07-08 23:47:40	Tanker
244109000	6927.09	18.9	25.741	-77.1168	183.213	243	2019-11-29 05:05:30	Cargo			564575000	47247.1	14	25.8506	-77.5813	276.482	20	2020-07-08 23:11:36	Cargo
259805000	5109.65	10.7	25.817	-77.1616	287.251	308	2019-11-29 09:20:30	Cargo			352787000	2626.16	11	25.817	-77.0915	54.9714	795	2020-07-09 01:08:52	Cargo
240904000	3585.87	10.4	25.8214	-77.1427	303.842	2166	2019-11-29 09:26:30	Tanker			211839000	2823.01	12.2	25.7782	-77.1088	171.614	1629	2020-07-09 06:21:33	Cargo
319503000	14136.1	18.7	25.7491	-77.2404	244.683	2	2019-11-29 05:26:48	Pleasure Craft			538005691	2835	12.2	25.7779	-77.1125	179.06	1002	2020-07-09 06:22:31	Cargo
367431860	15197.5	7.7	25.7728	-77.2607	257.077	5	2019-11-29 05:29:01	Other			563972000	7074.95	7.4	25.7407	-77.1264	190.916	923	2020-07-09 05:35:15	Tanker
319440000	60050.6	8.5	25.9867	-77.6769	289.98	1	2019-11-29 05:18:59	Pleasure Craft			240904000	30293.6	8.5	25.8987	-77.3962	290.55	3	2020-07-09 05:32:57	Tanker
636017176	4391.32	17.7	25.7654	-77.1251	195.996	187	2019-11-29 06:51:04	Cargo			306157000	9090.15	13.6	25.768	-77.1947	244.31	1912	2020-07-09 12:28:35	Cargo
367771000	22679	18.1	25.8237	-77.338	275.763	28	2019-11-29 06:10:46	Tug			367589310	287.009	9.8	25.8011	-77.1117	155.226	1457	2020-07-20 05:42:46	Special Craft
214182746	6606.02	16.2	25.744	-77.1186	184.873	126	2019-11-29 15:42:37	Special Craft			538002662	19599.1	12.4	25.7393	-77.295	248.675	410	2020-07-09 12:42:22	Tanker
240531000	9048.62	18.1	25.7848	-77.2008	256.776	25	2019-11-29 06:36:41	Tanker			538005784	379.625	18.3	25.8001	-77.1135	188.899	971	2020-07-09 17:46:14	Tanker
308299000	136728	17.9	26.2061	-78.404	289.418	5	2019-11-29 09:07:48	Cargo			563001900	415.628	18.3	25.8003	-77.1106	146.137	576	2020-07-09 17:45:44	Cargo
305461000	7632.14	12.8	25.808	-77.1889	273.828	1	2019-11-29 10:23:42	Cargo			220245000	366.114	18.3	25.8002	-77.1123	169.936	1407	2020-07-09 17:46:02	Cargo
636017350	6859.92	17.6	25.7448	-77.0911	161.431	32	2019-11-29 15:19:24	NA			209862000	392.627	18.3	25.8003	-77.1112	153.443	2703	2020-07-09 17:45:50	Cargo
636017753	6635.11	16.1	25.7446	-77.1255	190.844	87	2019-11-29 15:41:14	Cargo			356874000	5324.44	17.7	25.7565	-77.1245	192.52	1320	2020-07-09 22:36:04	Cargo
378112685	7293.23	17.1	25.7556	-77.063	136.744	4	2019-11-29 15:25:19	Tug			218842000	5346.39	17.7	25.7557	-77.1204	187.956	2910	2020-07-09 22:36:51	NA
368098000	58420.9	16	25.8626	-77.692	276.602	1	2019-11-29 23:30:29	Special Craft			636091731	3021.79	11.8	25.7763	-77.11	174.516	2390	2020-07-23 22:53:48	Cargo
319137200	6428.09	10.4	25.854	-77.1445	330.649	231	2019-11-30 01:42:48	Pleasure Craft			636017828	14206.2	10.7	25.7201	-77.2206	229.358	693	2020-07-10 05:26:12	Tanker
259924000	6232.83	11.8	25.7606	-77.1532	220.181	141	2019-11-30 00:31:18	Cargo			319181000	6907.32	11.1	25.7426	-77.1282	192.714	387	2020-07-26 08:01:27	Pleasure Craft
214182695	41596.6	9.2	25.9049	-77.5125	285.844	1	2019-11-30 00:06:45	Cargo			636016434	7640.16	13.2	25.7993	-77.0369	93.448	473	2020-07-10 07:03:10	Cargo
577016000	7410.5	9.8	25.869	-77.1277	348.56	4	2019-11-30 01:35:08	Tug			372843000	463.511	12.7	25.7993	-77.1127	176.653	924	2020-07-10 07:22:01	Cargo
636018567	6933.5	13	25.7409	-77.115	181.728	17	2019-11-30 00:37:49	Tanker			255805930	5251.43	18.8	25.7619	-77.1381	208.633	2340	2020-07-10 10:07:01	Cargo
378112812	11346.6	12.9	25.7619	-77.0096	114.034	4	2019-11-30 01:04:38	Tug			563025800	5239.27	18.7	25.7606	-77.135	204.861	674	2020-07-10 10:07:37	Cargo
357281000	14897.3	9.9	25.8011	-77.2615	269.023	1	2019-11-30 01:39:23	Passenger			636014185	5193.1	12.9	25.7566	-77.1106	177.438	1022	2020-07-10 11:50:03	Tanker
353244000	9229.69	20.8	25.7236	-77.0867	163.48	31	2019-11-30 05:23:55	Tanker			566853000	40469.3	13.1	25.8489	-77.5134	277.27	2	2020-07-10 09:03:51	Cargo
311000799	31030.8	13.2	25.8101	-77.4223	271.431	7	2019-11-30 10:39:10	Tug			271042520	5194.05	12.9	25.7567	-77.1098	176.483	1186	2020-07-10 11:49:51	Tanker
369347000	17030.8	20	25.7117	-76.9767	126.757	56	2019-11-30 05:33:10	Special Craft			235076275	5192.59	12.9	25.7566	-77.1112	178.099	537	2020-07-10 11:50:12	Tanker
236671000	11710	20.4	25.7057	-77.1574	202.263	29	2019-11-30 06:02:28	Cargo			636017659	9930.75	19.3	25.7505	-77.1928	233.666	357	2020-07-10 19:20:22	Cargo
258682000	52410.8	13.5	25.8834	-77.6282	279.899	2	2019-11-30 03:27:41	Tanker			636016198	9536.53	17.1	25.7215	-77.142	197.707	1002	2020-07-10 20:28:11	Cargo
538004117	20963.2	21.3	25.7831	-77.3208	263.833	1	2019-11-30 04:45:50	Cargo			369125000	81942.9	12.9	26.0466	-77.8854	289.461	1	2020-07-10 22:19:01	Pleasure Craft
255805979	5267.09	9.5	25.7564	-77.1052	171.601	2325	2019-11-30 14:33:01	Cargo			636091346	8814.6	9	25.826	-77.1973	286.541	1171	2020-07-11 00:36:56	Cargo
255806077	2464.71	16.3	25.7845	-77.1259	211.727	1953	2019-11-30 22:16:37	Cargo			271044090	9994.48	12.2	25.7141	-77.1264	187.695	517	2020-07-11 01:57:22	Tanker
305055000	17268.1	10.1	25.8185	-76.9416	84.3714	89	2019-11-30 15:31:30	Cargo			249667000	7043.86	10.7	25.7411	-77.1268	191.338	527	2020-07-11 11:09:41	Passenger
563553000	45471.9	13.7	25.8681	-77.5608	279.212	3	2019-11-30 17:03:48	Tanker			311478000	5313.38	16.3	25.7891	-77.0624	107.513	552	2020-07-14 23:06:45	Passenger
244561000	7500.89	16.9	25.747	-77.1543	213.454	32	2019-11-30 20:56:15	Cargo			312882000	6503.88	17.8	25.7473	-77.1317	196.757	485	2020-07-26 13:18:57	Tanker
311000798	35199	13.3	25.8528	-77.4598	279.056	2	2019-11-30 18:39:15	Tug			538002544	16263.4	13.3	25.7906	-77.2745	264.984	700	2020-07-11 15:48:21	Cargo
226000000	62080.5	15.8	25.887	-77.7253	278.76	1	2019-11-30 22:53:27	Tanker			636012871	8678.21	13.1	25.7686	-77.1904	243.475	556	2020-07-11 16:09:52	Cargo
220556000	10524.9	19.7	25.7087	-77.1202	183.928	1069	2019-11-30 23:31:57	Tanker			636092120	1204.87	13.6	25.7927	-77.1113	171.982	1058	2020-07-11 18:28:16	NA
249852000	4522.1	10.7	25.7711	-77.0854	142.449	130	2019-11-30 23:54:28	Tanker			377911000	1201.44	13.6	25.7926	-77.1127	178.622	918	2020-07-11 18:27:56	Cargo
311263000	3172.77	16	25.7788	-77.0968	149.38	865	2019-12-01 00:49:33	Passenger			538004037	3947.49	11.5	25.7678	-77.1127	179.718	1168	2020-07-11 19:37:26	Cargo
308865000	1775.65	8.4	25.7894	-77.1215	208.87	19032	2019-12-10 06:48:52	Passenger			477091200	542.784	12.3	25.7987	-77.1117	166.955	2480	2020-07-25 20:56:38	Cargo
273437230	3492.04	15.8	25.7719	-77.1121	178.62	283	2019-12-01 00:46:03	Special Craft			36690000	13489.3	12.9	25.734	-77.2234	235.088	177	2020-07-14 22:33:31	Unspecified
308516000	1294.02	14.2	25.8151	-77.1116	6.11158	25332	2019-12-19 15:54:35	Passenger			477222400	4440.87	12.9	25.7664	-77.13	202.533	467	2020-07-11 22:16:05	Cargo
310674000	2359.36	10.2	25.7837	-77.1217	201.661	8209	2019-12-09 06:08:51	Passenger			371558000	5847.01	13.1	25.755	-77.0898	156.688	1458	2020-07-11 22:05:36	Tanker
309987000	3180.13	16	25.7771	-77.1003	156.547	397	2019-12-01 00:48:45	Tanker			367781630	46540.5	20.8	25.8165	-77.5768	271.887	1	2020-07-11 22:14:36	Cargo
370491000	1966.37	16.3	25.7857	-77.1124	178.31	7378	2019-12-06 21:50:35	Passenger			565513000	5776.6	12.6	25.7513	-77.1146	181.617	1733	2020-07-12 06:47:12	Tanker
310780000	1077.46	12.4	25.7941	-77.11	163.999	6896	2019-12-15 04:13:15	Passenger			477510600	7987.33	15.2	25.7367	-77.0829	157.969	1471	2020-07-11 23:05:56	Cargo
255806153	90.7837	16.2	25.8038	-77.1138	296.836	18471	2019-12-31 02:51:51	Passenger			636011627	9002.36	19.1	25.7352	-77.1616	212.728	1391	2020-07-12 03:30:16	Cargo
259765000	15303.2	18.8	25.7599	-77.2577	251.541	2	2019-12-01 06:51:46	Special Craft			538007510	5778.79	12.6	25.7513	-77.1126	179.704	1345	2020-07-12 06:46:43	Cargo
353479000	1039.34	12.4	25.7941	-77.1132	181.505	8983	2019-12-15 04:12:25	Passenger			235116958	5779.25	12.5	25.7513	-77.1159	182.951	760	2020-07-12 06:47:33	Tanker
249048000	1455.23	11.1	25.7922	-77.1204	210.789	4830	2019-12-15 04:50:05	Passenger			319088500	6679.06	18.9	25.7439	-77.1231	188.718	211	2020-07-12 03:37:04	Pleasure Craft
245206000	3420.42	12.5	25.7827	-77.1382	227.572	5968	2019-12-02 05:59:56	Passenger			352812000	5723.06	13.9	25.7527	-77.1233	190.452	179	2020-07-18 08:47:05	Cargo
319028100	9697.27	21.1	25.7415	-77.1812	224.775	50	2019-12-01 02:20:23	Pleasure Craft			477390100	14278.1	12.2	25.6751	-77.1261	185.289	1071	2020-07-26 18:15:06	Cargo
636019413	2757.17	20	25.78	-77.1222	199.507	1101	2019-12-01 04:51:09	Cargo			538008281	30780.8	12.7	25.7791	-77.4187	265.009	704	2020-07-13 00:44:42	Tanker
371003000	2888.85	19.9	25.7798	-77.1252	204.994	1348	2019-12-01 04:50:39	Special Craft			220563000	27570.2	14.6	25.8109	-77.3877	271.786	761	2020-07-14 05:08:27	Tanker
308045000	1072.77	8.5	25.8057	-77.1233	283.723	13524	2019-12-04 02:31:09	Passenger			249592000	9009.57	11.9	25.7307	-77.0729	153.638	975	2020-07-13 02:24:12	Tanker
240904000	3786.75	20.1	25.779	-77.1393	224.193	5087	2019-12-01 04:48:21	Tanker			538006566	2748.37	12.7	25.7789	-77.1168	188.15	798	2020-07-13 04:24:48	Tanker
538007911	3116.41	20	25.782	-77.0928	139.821	928	2019-12-01 04:55:57	Tanker			370558000	4603.18	12.6	25.785	-77.1541	243.59	1261	2020-07-13 04:34:28	Tanker
248392000	1158.07	11	25.793	-77.1129	179.919	4275	2019-12-15 04:52:15	Passenger			566254000	2749.79	12.7	25.7792	-77.1188	192.232	752	2020-07-13 04:25:17	Tanker
247257900	150.24	16.1	25.8048	-77.1129	2.33356	8260	2019-12-31 02:52:08	Passenger			212314000	1808.22	13.2	25.7874	-77.1162	190.514	616	2020-07-13 14:00:22	Cargo
246648000	2606.97	20	25.7803	-77.1178	190.788	3982	2019-12-01 04:51:51	Passenger			354315000	7260.76	12.6	25.7383	-77.1206	186.015	1089	2020-07-13 06:39:17	Cargo
311000660	2141.38	21.3	25.7852	-77.1198	198.733	6235	2019-12-20 13:09:40	Passenger			548916000	1809.12	13.3	25.7875	-77.117	192.93	1047	2020-07-13 14:00:34	NA
352135000	5291.85	20.1	25.7842	-77.0647	113.908	29	2019-12-01 05:00:32	Cargo			305361000	1808.86	13.3	25.7873	-77.1156	188.533	724	2020-07-13 14:00:13	Cargo
477854700	2717.94	20	25.7802	-77.1215	198.315	979	2019-12-01 04:51:16	Tanker			215810000	1812.89	13.2	25.7876	-77.1176	194.853	813	2020-07-13 14:00:43	Tanker
311042900	322.256	19.8	25.8011	-77.111	142.347	28730	2019-12-08 09:37:44	Passenger			636015278	1828.71	13.3	25.787	-77.1136	182.158	470	2020-07-13 13:59:43	Cargo
355263000	1675.06	10.6	25.7983	-77.1287	250.205	15554	2019-12-07 11:23:17	Passenger			636015562	5525.18	17.2	25.7553	-77.1273	195.074	979	2020-07-13 15:53:16	Tanker
311478000	431.414	11.3	25.8044	-77.1171	284.908	22527	2019-12-15 13:07:12	Passenger			241190000	3745.76	11.1	25.7721	-77.1269	201.793	2516	2020-07-15 13:33:18	Tanker
235009400	5728.95	12.8	25.7547	-77.0937	160.441	11	2019-12-01 10:17:45	Tanker			305179000	6320.33	12.2	25.7465	-77.109	176.476	943	2020-07-13 21:57:23	Cargo
538071410	6415.54	19.9	25.7485	-77.133	198.231	810	2019-12-01 06:30:50	Passenger			538005873	6320.46	12.2	25.7465	-77.1097	177.042	1167	2020-07-13 21:57:14	Special Craft
310679000	6392.93	19.9	25.7479	-77.13	195.487	2096	2019-12-01 06:31:19	Tanker			538007405	1522.96	8.1	25.79	-77.1161	191.936	880	2020-07-14 03:34:48	Cargo
355831000	1180.21	11.1	25.8066	-77.1242	287.299	9247	2019-12-08 03:23:28	Passenger			249948000	18489.9	3.8	25.7562	-77.2897	253.496	10	2020-07-14 03:39:00	Tanker
308017000	1015.61	9.4	25.8116	-77.1175	333.175	8255	2019-12-27 03:40:12	Passenger			257321000	69049.1	14.4	25.9498	-77.7827	283.795	1	2020-07-14 03:33:03	Cargo
370039000	2060.99	15	25.7869	-77.1035	152.838	5007	2019-12-15 07:57:12	Passenger			305461000	10789.4	3.9	25.7275	-77.1802	218.594	228	2020-07-14 05:17:51	Cargo
229740000	1434.71	18.5	25.7905	-77.112	176.314	1448	2019-12-26 12:19:45	Tanker			372051000	10383.7	3.9	25.7211	-77.1624	208.447	1254	2020-07-14 05:33:51	Cargo
305933000	2052.36	18.8	25.7849	-77.1119	177.099	1271	2019-12-01 10:35:32	Cargo			248264000	23643.3	13.4	25.7357	-77.3364	251.445	3	2020-07-14 07:29:46	Cargo
577349000	1091.13	8.1	25.8072	-77.123	292.387	1683	2019-12-04 02:31:48	Passenger			220402000	67908.3	7.2	26.0991	-77.7069	299.1	1	2020-07-14 07:29:26	NA
564755000	1587.53	13.4	25.8148	-77.1226	322.563	3102	2019-12-31 14:38:58	Cargo			538005164	6693.12	13.6	25.7619	-77.1614	226.408	779	2020-07-14 10:10:58	Cargo
563062200	2809.43	18.8	25.7849	-77.1321	222.893	1723	2019-12-01 10:39:01	Cargo			636018683	3435.15	10.9	25.7784	-77.0928	144.121	1415	2020-07-25 00:44:57	Tanker
351468000	1081.54	8.6	25.8046	-77.1237	276.547	1948	2019-12-04 02:30:38	Special Craft			538004173	8987.1	13.7	25.7223	-77.1133	180.253	1019	2020-07-14 08:22:56	Tanker
235068802	2070.64	18.8	25.7849	-77.1159	188.075	1080	2019-12-01 10:36:14	Special Craft			311042900	616.961	7.8	25.7984	-77.1156	205.056	4535	2020-07-28 02:42:58	Passenger
636016731	2948.49	9.6	25.7768	-77.1134	180.841	396	2019-12-02 21:40:21	Tanker			309987000	6644.1	10.8	25.758	-77.0697	139.375	818	2020-07-14 17:57:59	Tanker
357444000	46478.4	10	25.6031	-77.5198	241.426	1	2019-12-01 09:11:46	Cargo			538004992	28360.9	13.1	25.7882	-77.3952	266.62	792	2020-07-14 21:47:21	Tanker
256971000	2049.89	18.8	25.7849	-77.113	180.075	1064	2019-12-01 10:35:44	Cargo			538006543	9123.1	12.2	25.7252	-77.1414	198.166	962	2020-07-14 22:55:00	Tanker
563678000	4061.37	17	25.7668	-77.1146	182.307	1244	2019-12-23 01:53:40	Tanker			311000915	2165.57	16.6	25.784	-77.1103	173.033	1336	2020-07-14 23:16:15	Tanker
308628000	1547.41	9.9	25.7987	-77.0984	110.168	3431	2019-12-04 07:55:21	Passenger			356579000	1542.46	8.9	25.7955	-77.1003	125.139	2090	2020-07-15 05:27:02	Cargo
636018693	2458.11	13	25.7816	-77.1085	169.602	1626	2019-12-24 16:29:43	Cargo			256304000	2295.29	16.5	25.7849	-77.1027	153.437	511	2020-07-14 23:14:45	Cargo
636092791	5178.73	9.9	25.757	-77.1072	173.638	1656	2019-12-01 18:55:36	NA			538008761	1506.33	9.2	25.8017	-77.098	97.3603	1481	2020-07-15 05:24:23	Tanker
370375000	2004.88	11.6	25.7859	-77.1078	165.296	1604	2019-12-23 22:38:52	Cargo			538008094	654.484	9.7	25.7977	-77.1146	194.407	1517	2020-07-15 00:43:47	Cargo
636017692	5178.76	9.9	25.7569	-77.1082	174.71	1307	2019-12-01 18:55:17	Cargo			477176900	4163.46	19.3	25.7666	-77.1212	191.457	564	2020-07-15 02:11:21	Tanker
636017753	9719.63	15.1	25.7202	-77.1436	198.356	1837	2019-12-02 00:18:20	Cargo			538006545	1482.22	9	25.7982	-77.0994	113.245	1016	2020-07-15 05:25:52	Tanker
366917720	7048.81	18.3	25.7593	-77.1635	225.882	66	2019-12-17 09:17:10	Tug			354073000	3759.46	11	25.7702	-77.1203	191.23	1101	2020-07-15 13:31:18	Tanker
371083000	1398.21	7.5	25.8132	-77.1218	320.665	19092	2019-12-04 02:34:38	Passenger			338009000	16313.9	10.1	25.8225	-77.2743	277.508	16	2020-07-15 14:20:26	Cargo
367799380	2963.71	20.7	25.7767	-77.1128	179.731	3990	2019-12-26 00:22:13	Cargo			312719000	8602.19	13.5	25.7278	-77.0934	166.914	173	2020-07-15 15:16:57	Tanker
378391000	11603.8	23.2	25.7361	-77.2016	229.867	1	2019-12-01 15:03:14	Tug			636019327	10743.7	16.1	25.7514	-77.2033	237.421	1115	2020-07-15 17:22:22	Tanker
636013813	5337.05	9.8	25.7557	-77.1203	187.926	1752	2019-12-01 18:51:17	Tanker			636017382	652.628	14.1	25.8017	-77.1192	253.023	1777	2020-07-15 21:42:12	Cargo
373959000	5152.74	18.5	25.7572	-77.1079	174.375	2964	2019-12-22 11:33:37	Cargo			538008233	16699.3	16.6	25.7852	-77.2782	263.046	247	2020-07-15 17:06:03	Tanker
367125330	2556.83	11.9	25.8247	-77.1228	337.436	2145	2019-12-24 19:35:34	Tug			319009600	48101.7	13.1	25.8045	-77.5926	270.24	17	2020-07-15 17:26:07	Pleasure Craft
229316000	3570.74	12.5	25.7827	-77.1402	229.727	1271	2019-12-02 05:59:26	Tanker			356389000	4448.58	14.1	25.7635	-77.117	185.197	528	2020-07-16 02:17:55	Cargo
636018566	10339.9	11.8	25.7163	-77.0762	159.185	1328	2019-12-01 21:07:56	Tanker			339563000	2312.71	11.4	25.7827	-77.1101	173.034	4763	2020-07-24 12:39:48	Special Craft
338760000	12344.4	14.4	25.6935	-77.093	170.714	855	2019-12-01 22:00:33	Cargo			339396000	1724.21	8.2	25.8084	-77.1292	288.806	2528	2020-07-17 07:34:11	Pleasure Craft
319103800	9785.15	15.1	25.7205	-77.1464	199.997	1133	2019-12-02 00:17:43	Tanker			368097670	5084	14.1	25.761	-77.0937	157.755	370	2020-07-16 02:12:31	Other
319072300	12180	16.2	25.6941	-77.1254	185.859	117	2019-12-01 23:28:51	Pleasure Craft			538004721	6514.51	13.4	25.7454	-77.1236	189.355	786	2020-07-16 03:51:43	Cargo
248325000	1169.75	11.3	25.808	-77.1235	295.62	3459	2019-12-08 03:22:58	Passenger			246572000	13070.6	13.2	25.7009	-77.1775	209.566	685	2020-07-16 05:53:02	Cargo
538008024	5215.47	17.8	25.7582	-77.1273	195.945	1124	2019-12-02 03:53:03	Cargo			373830000	13079.6	13.1	25.7027	-77.181	211.336	1240	2020-07-16 05:54:02	Cargo
636017557	49671.1	20.5	25.5178	-77.4943	230.357	1	2019-12-02 00:10:56	Cargo			548881000	13775.4	12.8	25.7199	-77.2147	227.684	980	2020-07-16 06:03:41	NA
370271000	1860.94	9.8	25.7867	-77.1147	185.307	1619	2019-12-03 04:29:48	Cargo			366996000	17232.7	12.4	25.7504	-77.2744	249.977	620	2020-07-16 06:21:22	Other
319098900	52718.6	14.9	25.8793	-77.6321	279.338	1	2019-12-02 00:16:15	Pleasure Craft			538002487	3107.24	12.4	25.7755	-77.1155	184.795	1131	2020-07-16 10:04:41	Tanker
563422000	5820.57	14.7	25.7535	-77.1311	198.104	1545	2019-12-02 04:26:56	Tanker			636019289	3117.46	12.4	25.7757	-77.118	189.355	1217	2020-07-16 10:05:20	Cargo
248939000	2081.03	9.5	25.787	-77.103	151.419	3784	2019-12-13 03:50:17	Passenger			636014652	7324.26	13.4	25.7373	-77.1146	181.32	1331	2020-07-16 16:59:14	Cargo
319597000	32479.8	13.3	25.8222	-77.4362	273.751	62	2019-12-02 02:03:09	Pleasure Craft			319006200	3112.26	12.4	25.7756	-77.1174	188.19	586	2020-07-16 10:05:10	Pleasure Craft
244870311	4025.51	12.5	25.7827	-77.1459	234.989	2032	2019-12-02 05:57:56	Cargo			249549000	3171.12	12.3	25.775	-77.1091	173.134	837	2020-07-16 10:03:00	Tanker
636016606	5405.21	17.9	25.7547	-77.1136	180.695	46	2019-12-02 03:50:26	Cargo			636018113	4147.28	12	25.7737	-77.0878	142.772	1356	2020-07-16 09:57:20	Tanker
244140580	1442.88	10.8	25.7991	-77.1265	250.619	7013	2019-12-08 03:25:58	Passenger			218853000	7372.3	13.3	25.7379	-77.1	169.934	1145	2020-07-16 16:55:43	Cargo
372050000	2115.21	15	25.7844	-77.1126	178.997	2423	2019-12-08 21:44:13	Cargo			311058700	3054.54	12.1	25.7771	-77.122	197.152	1835	2020-07-17 19:45:33	Passenger
366846000	5275.44	17.8	25.7563	-77.1205	188.217	1028	2019-12-02 03:51:44	Tanker			477318300	7320.93	13.5	25.7374	-77.1167	182.936	1663	2020-07-16 16:59:44	Cargo
636017641	2109.82	17.3	25.7844	-77.114	182.878	1616	2019-12-04 21:52:15	NA			235050033	7328.84	13.4	25.7373	-77.1117	179.056	1178	2020-07-16 16:58:33	Tanker
319153100	5716.73	23.3	25.7592	-77.1423	210.836	65	2019-12-25 22:59:51	Pleasure Craft			538005111	6405.63	15.5	25.7462	-77.1219	188.05	701	2020-07-16 19:37:13	Tanker
210057000	2259.66	9.9	25.8038	-77.0904	89.0489	14965	2019-12-13 04:31:15	Cargo			219310000	3956.03	13.3	25.7692	-77.1017	163.571	863	2020-07-16 21:08:36	Tanker
253068000	4573.34	12.5	25.7826	-77.1523	239.617	1001	2019-12-02 05:56:16	Cargo			229698000	2876.96	13.4	25.7908	-77.0879	119.169	747	2020-07-16 21:01:56	Cargo
357449000	5966.91	14.7	25.7496	-77.1148	181.81	42	2019-12-02 04:23:14	Tanker			247279600	2882.24	13.4	25.792	-77.0871	116.29	1338	2020-07-16 21:01:35	Tanker
219683000	1609.56	9.8	25.7951	-77.0998	124.992	1380	2019-12-04 07:56:41	Tanker			636017411	2878.4	13.4	25.7913	-77.0876	117.925	1246	2020-07-16 21:01:47	Tanker
249266000	8510.49	13	25.7517	-77.1757	227.529	3	2019-12-02 03:09:39	Tanker			538003439	941.537	18.5	25.8101	-77.1188	321.245	1579	2020-07-17 03:51:21	Tanker
377913000	1244.23	14.4	25.8147	-77.1132	358.743	5519	2019-12-19 15:54:58	Cargo			636018919	1825.85	18.4	25.8148	-77.0998	46.2602	1615	2020-07-17 03:54:51	Tanker
311000879	29.2805	11.4	25.8037	-77.1129	13.732	6535	2019-12-21 23:32:25	Passenger			477528700	1658.66	18.6	25.8087	-77.1284	290.579	1936	2020-07-17 03:49:39	Tanker
538071072	5217.21	17.8	25.7586	-77.1289	197.755	112	2019-12-02 03:53:21	Pleasure Craft			338355553	12640.2	12.2	25.7033	-77.1733	208.518	2	2020-07-17 01:22:43	Pleasure Craft
311000760	3498.31	10.6	25.8074	-77.1475	277.324	1587	2019-12-02 10:36:03	Tanker			538006339	4319.04	15.3	25.7656	-77.1232	193.651	1029	2020-07-17 08:06:54	Cargo
312882000	2752.71	15.2	25.7793	-77.1066	166.742	2205	2019-12-22 04:14:28	Tanker			309369000	9899.6	12.4	25.7189	-77.1448	198.739	6	2020-07-17 08:15:10	Cargo
240715000	1964.99	11.4	25.7858	-77.1113	175.298	812	2019-12-23 22:39:52	Tanker			257320000	5975.02	15	25.7495	-77.112	179.082	1043	2020-07-17 18:01:39	Tanker
245304000	1015.54	9.2	25.8118	-77.1171	335.573	4258	2019-12-27 03:40:01	Passenger			356436000	5000.77	17.8	25.7594	-77.1239	192.637	391	2020-07-17 11:46:43	Special Craft
309168000	5326.89	15.6	25.7556	-77.1188	186.245	1255	2019-12-02 08:53:37	Passenger			311527000	1330.14	9.8	25.7917	-77.1155	190.882	90	2020-07-20 05:46:26	NA
305007000	794.43	20	25.7981	-77.1182	221.375	4662	2019-12-08 09:36:27	Cargo			353328000	3172.99	12.1	25.777	-77.1251	202.552	2071	2020-07-17 19:46:23	Cargo
375902000	354.825	11	25.8045	-77.1096	69.8114	4100	2019-12-21 23:33:24	Cargo			367602990	16166.6	11.5	25.7989	-77.2741	268.252	212	2020-07-17 20:27:53	Pleasure Craft
636017306	3453.08	10.7	25.8082	-77.147	278.87	2284	2019-12-02 10:36:22	Cargo			311000251	5456.12	12.3	25.7544	-77.1179	185.179	1993	2020-07-17 21:53:56	Tanker
319137800	8173.66	16.3	25.7615	-77.18	235.222	59	2019-12-02 08:41:19	Pleasure Craft			235010180	2305.07	12.4	25.8079	-77.0905	77.4906	1545	2020-07-25 20:50:27	Cargo
356436000	1841.28	9.9	25.7889	-77.1219	208.963	2537	2019-12-03 04:27:18	Special Craft			563073700	5577.58	10.1	25.8516	-77.1292	343.061	1225	2020-07-18 01:04:44	Cargo
311020700	113.918	16.1	25.8044	-77.1132	347.85	5832	2019-12-31 02:52:02	Passenger			237943000	3249.12	14.8	25.7752	-77.1215	195.299	1678	2020-07-18 03:23:48	Tanker
518630000	5225.27	18.7	25.7678	-77.0788	139.175	234	2019-12-03 07:04:45	Cargo			255805855	3498.03	19.8	25.7719	-77.113	180.071	3612	2020-07-20 10:09:12	Cargo
538071125	5966.62	16.3	25.7582	-77.1452	212.684	17	2019-12-02 08:48:13	Passenger			367635951	4854.24	13.8	25.7644	-77.091	153.195	676	2020-07-18 08:38:51	Pleasure Craft
308457000	1578.56	13.3	25.8136	-77.124	315.708	4583	2019-12-31 14:39:29	Passenger			477534900	698.636	7.1	25.8077	-77.1181	312.262	2284	2020-07-23 14:52:02	Tanker
356811000	5775.05	13.1	25.7514	-77.1097	176.771	892	2019-12-02 12:46:39	Cargo			636092941	4191	17.3	25.7656	-77.1142	181.783	1995	2020-07-18 11:48:12	Cargo
477346500	5775.34	13.2	25.7514	-77.1103	177.432	2045	2019-12-02 12:46:50	Cargo			538005564	811.932	13.4	25.7966	-77.1101	159.606	1397	2020-07-18 15:44:34	NA
319777000	5781.86	12.6	25.7517	-77.1057	172.835	361	2019-12-02 12:45:40	Pleasure Craft			636016431	4190.87	17.3	25.7656	-77.1132	180.328	818	2020-07-18 11:48:00	Cargo
354580000	1187.47	7.7	25.8098	-77.1225	306.558	3329	2019-12-04 02:33:00	Special Craft			338302000	807.721	13.4	25.7964	-77.1108	165.003	2199	2020-07-18 15:44:45	Tanker
240480000	2868.9	9.8	25.7794	-77.1236	201.779	1321	2019-12-02 21:43:51	Tanker			477163800	873.726	13.6	25.7956	-77.1142	187.954	1419	2020-07-18 15:45:34	Tanker
319740000	2850.73	9.8	25.7787	-77.1206	195.556	1435	2019-12-02 21:42:51	Cargo			636018002	3809.37	12.4	25.7778	-77.0877	138.47	1147	2020-07-18 23:22:06	Tanker
319706000	7940.3	9.7	25.7956	-77.1916	263.668	1306	2019-12-02 22:07:00	Pleasure Craft			248770000	1915.32	8.2	25.8028	-77.132	267.966	1185	2020-07-19 04:33:07	Cargo
636014224	58315.5	8.1	25.8399	-77.6931	274.124	1	2019-12-02 22:03:05	Cargo			431816000	18041.9	17.7	25.7426	-77.2798	247.997	1	2020-07-18 23:21:51	Cargo
377901104	1574.09	12.4	25.7898	-77.1084	163.21	10056	2019-12-18 16:59:10	Cargo			244115000	1848.09	8.2	25.8059	-77.1312	278.501	1686	2020-07-19 04:34:26	Cargo
356449000	690.992	9.3	25.8026	-77.1198	262.499	4915	2019-12-31 20:27:36	Special Craft			466243000	1873.53	8.2	25.8114	-77.1294	298.257	1396	2020-07-19 04:36:58	Tanker
309072000	3666.34	5.7	25.8228	-77.1426	305.854	571	2019-12-03 02:35:44	Tanker			466240952	35947.2	12.1	25.8159	-77.4712	272.287	1	2020-07-19 01:06:37	NA
538007198	5064.12	13.9	25.7599	-77.1284	197.76	1621	2019-12-03 03:33:11	Cargo			538090557	7007.39	12.7	25.7533	-77.1555	217.433	1220	2020-07-19 09:26:53	Cargo
312794000	1816.7	9.8	25.7883	-77.12	202.664	3123	2019-12-03 04:27:59	Tanker			564398000	5559.91	12.9	25.7533	-77.1117	178.684	1120	2020-07-19 09:15:44	Cargo
218853000	1842.87	9.9	25.787	-77.1156	188.385	2206	2019-12-03 04:29:28	Cargo			212960000	5560.63	12.9	25.7533	-77.1123	179.361	1233	2020-07-19 09:15:54	Cargo
256484000	2051.13	9.8	25.7852	-77.1094	170.142	1171	2019-12-03 04:31:37	Cargo			564972000	5929.73	13.6	25.7611	-77.0768	142.504	2597	2020-07-29 12:57:11	Tanker
311734000	1828.77	9.8	25.7873	-77.1166	191.514	5462	2019-12-03 04:29:08	Passenger			636018703	16287.7	3.1	25.8485	-76.9583	72.0432	4	2020-07-19 19:14:09	Cargo
566393000	1823.1	9.8	25.7874	-77.1171	193.103	743	2019-12-03 04:28:59	Tanker			255806138	7023.01	11.8	25.7407	-77.1031	171.946	1373	2020-07-19 20:15:44	Tanker
310376000	1833.16	9.8	25.7888	-77.1214	207.404	1390	2019-12-03 04:27:28	Passenger			538071327	7910.81	3	25.7935	-77.1911	261.941	120	2020-07-20 00:00:28	Passenger
319130200	1812.98	9.8	25.788	-77.119	199.468	3120	2019-12-03 04:28:18	Pleasure Craft			354564000	3927.02	14.8	25.768	-77.1125	179.355	202	2020-07-19 21:25:32	Cargo
372804000	1510.59	11.9	25.7898	-77.1124	177.781	7510	2019-12-12 20:16:32	Cargo			564220000	3157.08	9.6	25.7758	-77.1205	193.77	1496	2020-07-20 02:04:49	Cargo
215371000	4663.3	9.1	25.8107	-77.1587	280.02	1359	2019-12-03 05:54:41	Tanker			538006502	3570.87	3.6	25.7757	-77.131	210.405	654	2020-07-19 22:15:58	Tanker
353735000	1043.95	19.2	25.7941	-77.1116	172.811	966	2019-12-31 21:49:57	Special Craft			416491000	3156.64	9.7	25.7756	-77.1196	192.089	1239	2020-07-20 02:04:31	Cargo
373239000	5968.35	11.1	25.7535	-77.0907	158.135	1517	2019-12-03 14:20:08	Cargo			538006199	3415.61	9.8	25.7731	-77.1068	169.71	1461	2020-07-20 02:00:09	Tanker
309653000	10296.3	12.2	25.7425	-77.0354	131.11	240	2019-12-03 16:51:16	Passenger			636012508	3161.92	9.6	25.7753	-77.1181	189.427	6	2020-07-20 02:04:00	Tanker
258075000	5969.45	11	25.7539	-77.0896	157.049	1639	2019-12-03 14:20:28	Cargo			357444000	213.462	9.8	25.8037	-77.1108	83.4078	2137	2020-07-20 05:41:46	Cargo
356231000	4692.83	9.7	25.8185	-77.1567	290.912	1452	2019-12-04 00:20:25	Cargo			256802000	396.572	9.9	25.8059	-77.1101	46.5434	702	2020-07-20 05:40:57	Tanker
563000900	5518.17	12.6	25.7563	-77.1307	198.759	1599	2019-12-05 13:22:10	Cargo			357528000	5233.91	23.5	25.7571	-77.1232	191.241	529	2020-07-30 05:50:17	Cargo
319008900	33260	11	25.8155	-77.4444	272.392	3	2019-12-03 23:12:45	Pleasure Craft			249576000	1626.54	9.8	25.8167	-77.106	25.0594	1503	2020-07-20 05:36:47	Tanker
246506000	1072.82	8.2	25.8054	-77.1234	281.64	4470	2019-12-04 02:31:00	NA			235114799	3496.06	19.8	25.7719	-77.1136	181.072	1476	2020-07-20 10:09:06	Cargo
577362000	4256.06	7.5	25.7687	-77.1311	205.192	11	2019-12-04 02:13:58	Special Craft			249347000	3778.5	11.9	25.7762	-77.0903	143.116	1007	2020-07-20 11:53:37	Tanker
246619000	197.833	16.2	25.8027	-77.1147	245.165	1857	2019-12-31 02:51:32	Cargo			255806304	5565.61	12.6	25.7696	-77.072	132.558	1338	2020-07-20 17:23:29	Cargo
244830547	838.662	13.4	25.8014	-77.121	254.55	7950	2019-12-21 23:30:04	Passenger			636012853	6132.26	12.7	25.7491	-77.1245	190.868	563	2020-07-20 17:38:10	Tanker
377901111	2179.47	21.6	25.7845	-77.1187	195.193	6005	2019-12-06 12:03:42	Cargo			563868000	5071.97	6.7	25.8402	-77.1431	323.522	1136	2020-07-21 03:05:03	Tanker
477854400	21854.4	14.5	25.8039	-77.3309	270.186	2	2019-12-04 03:11:43	Tanker			636014623	2201.12	8.1	25.8232	-77.1154	353.478	1043	2020-07-21 04:11:06	Tanker
309198000	4387.54	7.8	25.7944	-77.0704	103.312	1724	2019-12-04 04:33:31	Tanker			538008581	2089.12	15.1	25.7847	-77.1107	173.727	1719	2020-07-21 07:36:45	Tanker
370269000	228.773	14.9	25.8017	-77.1142	214.2	6930	2019-12-17 06:03:38	Special Craft			319147800	3908.93	17.7	25.7698	-77.1247	197.463	1043	2020-07-21 16:04:03	Tanker
311427000	2064.83	15	25.7849	-77.1106	173.579	1433	2019-12-15 07:55:35	Passenger			232006748	6234.7	14.8	25.7472	-77.1143	181.287	966	2020-07-21 08:32:46	Cargo
636012382	1793.13	9.8	25.7912	-77.1012	139.203	757	2019-12-04 07:58:11	Tanker			338217000	1453.38	12.8	25.7903	-77.1135	182.106	1809	2020-07-21 16:29:08	Cargo
354215000	959.931	10.3	25.795	-77.111	168.532	6870	2019-12-13 04:23:54	Passenger			367721220	13452.3	12.2	25.7978	-77.2469	267.327	1171	2020-07-21 17:04:07	Cargo
369579000	2384.6	10.5	25.8145	-77.0925	59.0058	475	2019-12-04 07:49:21	Tug			538005955	5708.06	16.6	25.7554	-77.0925	158.997	1150	2020-07-21 21:17:55	Tanker
341295000	1555.07	9.8	25.8004	-77.0978	102.522	2653	2019-12-04 07:54:41	Cargo			249078000	19302.4	16.8	25.8012	-77.3054	269.294	1043	2020-07-21 20:34:26	Tanker
636018088	2861.06	9.3	25.7802	-77.1253	205.465	1407	2019-12-04 11:44:46	Cargo			356861000	4659.5	10	25.8277	-77.1509	305.332	1579	2020-07-21 23:08:37	Cargo
238303000	2808.79	9.5	25.779	-77.1202	194.921	1040	2019-12-04 11:42:56	Cargo			238016000	4661.53	9.9	25.8278	-77.1508	305.584	919	2020-07-21 23:08:33	Cargo
538006489	2811.28	9.5	25.7792	-77.1211	196.893	1238	2019-12-04 11:43:16	Tanker			538008202	4718.45	9.4	25.826	-77.1529	302.099	777	2020-07-21 23:09:31	Tanker
377901110	1445.7	18.4	25.7904	-77.1131	180.812	8831	2019-12-26 12:19:57	Cargo			218158000	1850.53	5.8	25.7988	-77.0952	106.058	2554	2020-07-22 04:15:24	Cargo
311000274	3286.32	16.3	25.7926	-77.0824	111.579	5309	2019-12-06 01:40:21	Passenger			538006979	1872.32	6.1	25.7956	-77.0964	117.661	1777	2020-07-22 04:13:13	Tanker
356912000	3668.69	13.3	25.7719	-77.1019	162.466	1386	2019-12-04 15:10:41	Cargo			371325000	6290.8	11.8	25.7467	-77.1106	177.885	900	2020-07-22 09:55:05	Tanker
538007275	3659.65	13.3	25.7725	-77.1001	159.492	1962	2019-12-04 15:11:10	Tanker			259104000	3306.9	11.1	25.7751	-77.1232	198.017	1481	2020-07-22 13:57:31	Tanker
232005596	15943.2	13.5	25.8355	-76.9579	77.0234	1139	2019-12-04 15:50:00	Tanker			466241000	3307.11	11.1	25.7749	-77.1227	197.114	1030	2020-07-22 13:57:21	Tanker
563073900	2190.39	17.3	25.7844	-77.119	195.961	1029	2019-12-04 21:51:20	Tanker			538006666	1700.68	14.2	25.7881	-77.1136	182.18	942	2020-07-24 23:09:08	Tanker
218158000	2106.78	17.3	25.7844	-77.113	180.241	2101	2019-12-04 21:52:26	Cargo			538006974	7071.63	16.9	25.7402	-77.1227	187.956	1002	2020-07-22 16:49:05	Tanker
367781630	2606.23	11.1	25.7799	-77.1134	180.977	3540	2019-12-11 20:24:37	Cargo			377901107	2314.97	11.4	25.7826	-77.1107	174.486	5081	2020-07-24 12:39:58	Cargo
563070600	2106.86	17.3	25.7844	-77.1125	178.798	1305	2019-12-04 21:52:32	Tanker			248944000	2375.89	12.9	25.782	-77.1132	180.538	1744	2020-07-22 22:56:47	Tanker
224436000	2470.03	17	25.7849	-77.0993	146.577	1784	2019-12-04 21:55:02	Tanker			371923000	14036.8	12.7	25.801	-76.973	91.0813	59	2020-07-22 22:20:57	Special Craft
636013054	1532.58	7.9	25.8022	-77.0977	95.3554	1335	2019-12-05 03:54:13	Tanker			310685000	7617.1	12.5	25.7808	-77.1847	250.718	113	2020-07-22 23:14:57	Tanker
311493000	4783.48	13.1	25.8305	-77.1501	309.036	2098	2019-12-07 10:29:27	Passenger			538004994	8031.79	8.9	25.7332	-77.1329	194.334	1372	2020-07-23 04:09:07	Tanker
319095200	1501.06	8	25.7997	-77.0986	106.265	2362	2019-12-05 03:53:03	Tanker			538008821	908.533	12.3	25.7962	-77.1173	208.425	2250	2020-07-25 20:58:16	Tanker
636015557	8865.97	14.9	25.7537	-77.1822	231.441	5	2019-12-05 02:02:46	Cargo			219149000	6158.01	8.6	25.8324	-77.1654	301.54	955	2020-07-23 08:57:53	Tanker
357659000	3295.06	16.2	25.7943	-77.0817	107.924	2604	2019-12-06 01:40:46	Passenger			244379000	6534.01	8.4	25.8285	-77.1719	295.254	930	2020-07-23 09:00:53	Cargo
636018861	5527.49	13.2	25.7537	-77.1172	184.382	1296	2019-12-05 09:52:33	Tanker			319863000	45488.3	8.7	25.8291	-77.5657	273.704	1	2020-07-23 06:55:06	Pleasure Craft
311082000	3162.13	11.1	25.7762	-77.1223	197.147	1418	2019-12-05 20:28:53	Passenger			229074000	682.917	7.2	25.8063	-77.119	297.387	2306	2020-07-23 14:51:14	Passenger
538005594	4460.01	11.3	25.7783	-77.0782	128.767	1678	2019-12-05 20:16:03	Cargo			312407000	3801.33	8.7	25.8124	-77.1495	285.282	180	2020-07-27 05:22:21	Tanker
564822000	5526.28	13.2	25.7537	-77.1166	183.753	1562	2019-12-05 09:52:23	Cargo			357835000	6265.08	7	25.7551	-77.1453	211.08	760	2020-07-23 14:23:22	Cargo
636018056	5531.22	13.2	25.7535	-77.1124	179.409	1106	2019-12-05 09:51:22	Cargo			477900100	7987.12	7	25.8728	-77.0913	15.6598	799	2020-07-23 15:26:32	Tanker
538090535	6085.82	13.2	25.7547	-77.1409	207.36	585	2019-12-05 09:58:23	NA			538007646	1329.36	16.3	25.7915	-77.1118	175.281	1083	2020-07-23 17:54:41	Tanker
538005167	5516.42	12.6	25.756	-77.1295	197.482	1667	2019-12-05 13:22:29	Tanker			538005884	3048.78	11.8	25.7763	-77.1077	170.091	1445	2020-07-23 22:53:10	Cargo
311069200	5517.23	12.6	25.7562	-77.1302	198.221	1249	2019-12-05 13:22:18	Tanker			477023800	3016.69	11.8	25.7762	-77.1126	179.328	1888	2020-07-23 22:54:30	Tanker
538006977	7177.53	12.2	25.741	-77.094	164.685	1671	2019-12-05 17:57:21	Tanker			311020600	32716.7	12	25.8006	-77.4392	269.51	15	2020-07-26 19:51:16	Passenger
218614000	1162.8	9	25.8093	-77.1226	304.053	3194	2019-12-27 03:42:12	NA			244044000	3017.96	11.8	25.7763	-77.1107	175.77	1453	2020-07-23 22:54:00	Cargo
373904000	3174.6	11.1	25.7748	-77.1121	178.452	2911	2019-12-05 20:25:53	Cargo			642122014	212.414	7.8	25.8053	-77.1133	351.62	1842	2020-07-28 02:46:20	Tanker
636017278	5783.74	20.7	25.7515	-77.1184	185.376	3420	2019-12-05 22:21:20	NA			538007376	5712.23	15.9	25.7698	-77.1561	229.123	1382	2020-07-24 08:04:05	Tanker
311000520	3291.29	16.3	25.7938	-77.0819	108.931	1427	2019-12-06 01:40:39	Tanker			372533000	4729.57	15.9	25.761	-77.1176	185.699	1309	2020-07-24 08:12:12	Cargo
355068000	2563.58	11.1	25.7828	-77.1245	206.711	590	2019-12-11 20:27:58	Special Craft			219212000	4675.61	15.8	25.7626	-77.1248	194.598	1579	2020-07-24 08:10:41	Tanker
319040000	6369.9	16	25.747	-77.1248	190.752	350	2019-12-06 01:26:40	Pleasure Craft			371900000	9227.19	12.4	25.7219	-77.0945	168.468	150	2020-07-24 06:10:04	Cargo
304094000	3287.43	16.2	25.7931	-77.0822	110.568	823	2019-12-06 01:40:28	Cargo			212175000	4675.33	15.9	25.7629	-77.1257	195.783	1751	2020-07-24 08:10:30	Cargo
255806063	3404.99	16.2	25.7851	-77.0857	126.829	3047	2019-12-06 01:38:34	Cargo			477730100	11747.3	16.1	25.6982	-77.0986	173.018	1227	2020-07-24 08:59:35	Cargo
371923000	8702.35	12	25.7276	-77.1355	194.985	517	2019-12-24 10:53:29	Special Craft			538090308	5094.16	15.9	25.7669	-77.1438	217.292	674	2020-07-24 08:06:42	Tanker
319821000	6508.41	16.3	25.7455	-77.1239	189.661	753	2019-12-06 03:50:10	Pleasure Craft			636012163	6345.55	11.8	25.7509	-77.0877	156.56	1452	2020-07-29 05:32:17	Tanker
312283000	639.573	9.4	25.8039	-77.1193	274.446	8601	2019-12-31 20:27:07	Tanker			305101000	11753.7	16.1	25.698	-77.1	173.692	1416	2020-07-24 08:59:53	NA
538008233	13250.7	10.9	25.6924	-77.162	201.69	732	2019-12-25 20:30:41	Tanker			577362000	2331.12	11.4	25.7824	-77.1125	178.951	1799	2020-07-24 12:40:29	Special Craft
538004353	8795.91	15.1	25.725	-77.1266	188.92	655	2019-12-06 09:29:39	Passenger			636016436	2318.99	11.4	25.783	-77.1079	167.383	1028	2020-07-24 12:39:09	Cargo
563103000	8805.27	15.1	25.7256	-77.1307	191.629	437	2019-12-06 09:30:32	Tanker			259712000	2313.15	11.4	25.7829	-77.109	170.279	1643	2020-07-24 12:39:29	Tanker
538002570	2175.83	21.6	25.7849	-77.12	198.981	990	2019-12-06 12:03:53	Cargo			538002775	2312.17	11.4	25.7828	-77.1095	171.577	836	2020-07-24 12:39:38	Tanker
538005884	2191.87	21.6	25.7857	-77.1225	205.907	1887	2019-12-06 12:04:17	Cargo			311040900	1916.85	10.4	25.7866	-77.1086	166.817	789	2020-07-24 17:57:15	Cargo
305134000	2343.1	21.6	25.7873	-77.1281	220.297	989	2019-12-06 12:05:11	Cargo			311024300	2403.94	13.3	25.7821	-77.1085	169.494	1752	2020-07-24 16:43:14	Cargo
311050800	2118.08	15.1	25.7843	-77.1138	182.295	4845	2019-12-08 21:43:56	Passenger			303270000	3331.95	10.5	25.796	-77.1451	255.659	1114	2020-07-24 18:09:06	Tanker
636016434	2256.03	21.6	25.7866	-77.1256	214.046	756	2019-12-06 12:04:47	Cargo			538007544	7284.01	12.5	25.7385	-77.1243	188.926	1080	2020-07-24 20:53:31	Tanker
255806069	2175.86	21.5	25.7847	-77.1193	196.953	1473	2019-12-06 12:03:47	Cargo			249593000	2745.51	14.2	25.7837	-77.1296	217.218	1362	2020-07-24 23:12:57	Tanker
563076300	4212.93	21.3	25.7959	-77.1541	258.504	793	2019-12-06 12:09:23	Cargo			241574000	1836.86	14.3	25.7872	-77.1165	191.076	1382	2020-07-24 23:09:50	Tanker
311058700	2247.05	16	25.7857	-77.1238	208.908	11887	2019-12-06 21:48:17	Passenger			353775000	2651.46	14.2	25.7839	-77.1282	215.196	1143	2020-07-24 23:12:39	Cargo
256691000	5074.69	16.2	25.7583	-77.1045	170.447	491	2019-12-06 12:48:29	Tanker			372618000	1622.01	14.3	25.7889	-77.1107	172.177	1405	2020-07-24 23:08:26	Tanker
352413000	4002.12	11.5	25.7807	-77.1439	230.73	1210	2019-12-06 18:49:34	Tanker			636018284	2098.81	14.3	25.7858	-77.1206	201.382	1262	2020-07-24 23:10:50	Cargo
636014299	2365.63	11.4	25.7821	-77.1123	178.406	1510	2019-12-06 18:58:33	Cargo			245546000	4002.73	10	25.8326	-77.1365	323.938	918	2020-07-25 02:47:30	Cargo
563016700	2366.63	11.4	25.7821	-77.1128	179.534	1438	2019-12-06 18:58:24	Cargo			357659000	4264.87	14.3	25.7664	-77.1015	164.43	1936	2020-07-25 19:22:46	Passenger
258028000	2368.23	11.4	25.7821	-77.1111	175.547	1238	2019-12-06 18:58:54	Tanker			355280000	4236.46	14.3	25.7658	-77.1058	170.346	1003	2020-07-25 19:23:46	Tanker
255805581	2042.78	16.1	25.7857	-77.1184	195.577	1582	2019-12-06 21:49:22	Cargo			351248000	532.039	12.3	25.7989	-77.1111	159.716	1798	2020-07-25 20:56:27	Cargo
563051400	1964.95	16.2	25.7857	-77.1129	180.006	2227	2019-12-06 21:50:28	Cargo			224444000	5771.63	9.5	25.8507	-77.1372	335.16	1266	2020-07-26 04:34:14	Tanker
477699800	1972.65	16.3	25.7857	-77.1114	175.408	1162	2019-12-06 21:50:47	Cargo			305855000	6477.38	9.6	25.8154	-77.1762	281.92	1389	2020-07-26 04:56:02	Cargo
354842000	1965.96	16.2	25.7857	-77.1134	181.45	3064	2019-12-06 21:50:22	Passenger			374306000	6658.79	11.1	25.7434	-77.1099	177.402	964	2020-07-26 07:56:06	Cargo
636018935	1968.05	16.3	25.7857	-77.1119	177.1	1489	2019-12-06 21:50:40	Cargo			248938000	6660	11.1	25.7434	-77.1088	176.422	940	2020-07-26 07:55:46	Cargo
305245000	4845.96	21.4	25.7601	-77.1198	188.157	1173	2019-12-07 01:35:38	Cargo			636018848	33470.5	11	25.8079	-77.4467	270.917	934	2020-07-26 09:40:16	Tanker
310500000	1027.04	9.2	25.8111	-77.1188	325.266	11053	2019-12-27 03:40:41	Passenger			538005127	4892.98	16.8	25.7607	-77.1251	194.374	2992	2020-07-27 00:43:44	NA
256393000	5206.47	21.4	25.7577	-77.101	166.728	242	2019-12-07 01:32:43	Pleasure Craft			258802000	6485.36	17.8	25.7462	-77.1264	191.921	883	2020-07-26 13:19:57	Tanker
239668000	5588.9	21.4	25.7636	-77.1472	217.749	1065	2019-12-07 01:39:50	NA			356407000	61945.4	10.7	25.9466	-77.7104	285.046	1	2020-07-26 11:15:26	Cargo
312785000	15931.4	11.7	25.661	-77.091	172.1	371	2019-12-07 05:53:42	Tanker			370995000	20826.2	18	25.7141	-76.9303	118.456	1114	2020-07-26 13:56:14	Tanker
255805801	15848.2	11.7	25.6625	-77.0859	170.194	217	2019-12-07 05:55:11	Cargo			209716000	6960.19	11.6	25.7407	-77.1087	176.481	2592	2020-07-26 16:13:36	Cargo
305179000	16084.5	11.7	25.6589	-77.0985	174.843	195	2019-12-07 05:51:32	Cargo			577199000	5885.92	16.8	25.7537	-77.0924	159.583	4	2020-07-27 00:37:14	Special Craft
311536000	4435.74	11.7	25.7658	-77.0979	160.252	2930	2019-12-23 10:32:32	Passenger			255805923	4893.69	16.8	25.7601	-77.1225	191.242	1827	2020-07-27 00:43:13	Cargo
368996000	3985.76	12.7	25.8105	-77.1519	281.456	2742	2019-12-07 10:23:54	Special Craft			538070734	6985.54	11.6	25.7407	-77.1063	174.593	119	2020-07-26 16:12:57	Pleasure Craft
308322000	3986.12	12.7	25.8104	-77.1519	281.172	1813	2019-12-07 10:23:51	Passenger			636018884	5132.26	7.6	25.7814	-77.1579	241.447	1150	2020-07-26 20:29:47	Tanker
311000396	1343.04	10.1	25.8041	-77.1263	273.188	1986	2019-12-07 11:25:27	Passenger			220565000	5736.07	16.1	25.7543	-77.0948	161.621	1168	2020-07-27 01:36:22	Tanker
636013690	11737.4	12.4	25.8224	-77.2281	280.41	1	2019-12-07 10:01:20	Cargo			319123900	38106.7	0	26.0262	-77.4028	310.57	15	2020-07-26 16:16:58	Pleasure Craft
352812000	4690.02	11.2	25.7675	-77.1376	211.665	570	2019-12-08 03:36:38	Cargo			232013525	8447.98	11.8	25.7411	-77.1615	215.06	207	2020-07-26 16:28:16	Cargo
377901107	2952.06	12.7	25.7768	-77.113	180.178	3431	2019-12-21 14:13:03	Cargo			538070998	34969.4	12.6	25.8205	-77.4612	273.181	3	2020-07-26 16:28:39	Pleasure Craft
339861000	8192.21	14.7	25.789	-77.1931	258.706	101	2019-12-07 13:02:59	Pleasure Craft			538003756	32243	12.3	25.8149	-77.4342	272.34	15	2020-07-27 02:49:53	Tanker
319009700	5132.02	13.4	25.7571	-77.1146	181.844	1688	2019-12-07 16:26:23	Pleasure Craft			319108400	15073.7	11.8	25.7408	-77.2463	242.477	23	2020-07-26 16:51:47	Pleasure Craft
477926800	4987.66	13.5	25.7594	-77.1024	167.816	1154	2019-12-07 16:29:23	Tanker			339859000	14662.6	11.8	25.7407	-77.2417	241.623	29	2020-07-26 16:50:28	Pleasure Craft
636015562	5619.2	13.5	25.7643	-77.0773	140.675	1331	2019-12-07 16:35:33	Tanker			538071410	128627	2.5	25.8454	-78.395	272.363	1	2020-07-26 17:19:56	Passenger
314467000	3607.72	12.5	25.7716	-77.1052	167.714	1455	2019-12-07 21:36:30	Cargo			671103100	15971.6	11.9	25.7257	-77.247	237.261	9	2020-07-26 17:34:39	Cargo
229378000	3612.74	12.5	25.772	-77.1035	164.824	1266	2019-12-07 21:36:02	Passenger			565108000	16923.6	12.3	25.7575	-77.2738	252.431	39	2020-07-27 02:04:24	Tanker
533744000	3610.72	12.5	25.7719	-77.104	165.744	1796	2019-12-07 21:36:11	NA			319499000	44563.6	11.9	25.8783	-77.5497	280.87	3	2020-07-26 18:28:58	Tanker
319963000	3950.03	13.3	25.7678	-77.113	180.068	1531	2019-12-07 23:40:28	Tanker			431314000	6296.42	16.6	25.7684	-77.1624	231.775	12	2020-07-27 00:51:08	Cargo
232006296	1604.64	11	25.8152	-77.1224	324.085	1879	2019-12-08 03:20:37	Tanker			366917720	9062.61	8	25.7953	-77.2029	264.303	58	2020-07-26 20:10:28	Tug
303270000	1473.57	11.2	25.7987	-77.1267	248.999	1094	2019-12-08 03:26:07	Tanker			235060455	74156.7	12.2	25.9961	-77.8217	286.967	2	2020-07-26 19:49:36	Tanker
249667000	4856.51	10.9	25.766	-77.1382	211.269	2743	2019-12-08 03:37:08	Passenger			311493000	72466.5	8.6	26.2701	-77.6203	315.778	1	2020-07-26 19:58:48	Passenger
319041000	4247.34	9	25.813	-77.1539	284.578	685	2019-12-08 06:32:47	Pleasure Craft			374226000	6493.72	7.9	25.7868	-77.175	253.385	10	2020-07-26 20:22:17	Cargo
357657000	317.21	19.8	25.8007	-77.112	162.428	1844	2019-12-08 09:37:38	Passenger			563097600	3843.09	8.7	25.8117	-77.1502	283.83	1814	2020-07-27 05:21:58	Tanker
636014189	360.835	19.9	25.8002	-77.1132	183.756	1067	2019-12-08 09:37:20	Tanker			229069000	4892.06	16.8	25.7605	-77.1241	193.161	68	2020-07-27 00:43:32	Tanker
371851000	321.512	19.9	25.8006	-77.1122	165.998	1394	2019-12-08 09:37:32	Cargo			369235000	5701.72	16	25.7593	-77.0838	149.26	195	2020-07-27 01:33:52	Tug
248148000	335.168	19.9	25.8004	-77.1126	174.57	1744	2019-12-08 09:37:26	Tanker			235073372	23785.7	16.4	25.8247	-77.349	275.775	3	2020-07-27 01:30:02	Cargo
477439600	5099.9	10.5	25.7578	-77.1063	172.518	1116	2019-12-08 11:44:53	Cargo			241124000	3441.93	9.2	25.8242	-77.1385	312.073	1432	2020-07-27 05:28:32	Cargo
310549000	5105.63	10.5	25.7579	-77.1051	171.177	503	2019-12-08 11:45:13	Tanker			319444000	53798	12.6	25.8934	-77.6403	280.845	3	2020-07-27 03:48:44	Pleasure Craft
636016928	5663.72	20.3	25.7523	-77.1142	181.235	1966	2019-12-24 01:12:25	NA			636018925	4203.34	13.1	25.7657	-77.1169	185.342	951	2020-07-27 12:26:08	Tanker
356946000	5197.56	18.2	25.7566	-77.1107	177.479	2290	2019-12-08 15:37:26	Cargo			219154000	7893.52	14	25.7322	-77.1138	180.641	705	2020-07-27 15:09:09	Tanker
229767000	5195.26	18.2	25.7568	-77.1079	174.392	1492	2019-12-08 15:37:57	Tanker			205609000	4509.47	15.8	25.764	-77.1018	165.77	1852	2020-07-27 17:16:13	Tanker
566949000	42904.3	18.4	25.8502	-77.5377	277.067	1	2019-12-08 14:19:27	Cargo			246524000	4509.44	15.8	25.7639	-77.1024	166.489	1402	2020-07-27 17:16:20	Cargo
538006384	5195.01	18.1	25.7567	-77.1084	175.011	1012	2019-12-08 15:37:51	Cargo			538006106	3929.91	11.6	25.77	-77.1	160.795	1840	2020-07-27 21:34:39	Cargo
538006836	6383.32	11.2	25.7463	-77.1213	187.546	1147	2019-12-08 16:40:26	Tanker			636017409	3794.93	11.5	25.7706	-77.1022	163.645	2404	2020-07-27 21:35:19	Tanker
636018238	5255.31	18.3	25.7576	-77.0994	165.102	5	2019-12-08 15:39:27	Cargo			538007597	7375.86	11.4	25.7956	-77.186	263.18	792	2020-07-27 22:00:50	Tanker
636012612	1166.73	11.2	25.7934	-77.1095	162.847	4281	2019-12-15 04:53:15	Tanker			367125330	4830.5	7.6	25.8453	-77.0994	16.2971	1393	2020-07-28 03:05:58	Tug
219088000	1623.09	9.6	25.7888	-77.1134	181.609	2046	2019-12-09 19:13:01	Cargo			311007500	4835.17	17.4	25.7602	-77.1067	172.625	1477	2020-07-28 13:47:52	Tanker
538006779	6982.02	11.4	25.7427	-77.0945	164.679	1111	2019-12-08 16:48:14	Cargo			249202000	4646.62	17.5	25.7649	-77.1313	203.25	374	2020-07-28 13:52:33	Cargo
564634000	2115.94	14.9	25.7844	-77.1115	176.108	1588	2019-12-08 21:44:26	Cargo			256174000	5783.71	11.9	25.7513	-77.1156	182.58	851	2020-07-29 05:39:57	Tanker
376609000	3834.89	10.7	25.7832	-77.144	234.069	703	2019-12-16 09:25:56	Cargo			310602000	3071.26	9.5	25.8298	-77.1035	17.8342	1149	2020-07-28 23:44:00	Tanker
477050800	3825.39	15.4	25.7925	-77.0768	108.546	2305	2019-12-08 21:52:13	Cargo			636019387	6280.89	11.9	25.7515	-77.1382	203.632	733	2020-07-29 05:46:06	Tanker
477318700	8605.41	13.5	25.7343	-77.1521	207.064	6	2019-12-08 19:21:16	Cargo			248392000	42653.9	6.5	25.7679	-77.5364	264.761	5	2020-07-29 04:32:33	Passenger
311492000	4066.16	18.3	25.7681	-77.124	195.768	3546	2019-12-09 03:52:33	Passenger			538006575	3218.92	11.1	25.7824	-77.1351	223.429	1072	2020-07-29 08:33:31	Tanker
229074000	1332.76	9.1	25.8153	-77.1107	9.73635	5320	2019-12-27 03:37:23	Passenger			235108619	4456.7	11.2	25.7872	-77.1536	246.055	1343	2020-07-29 08:39:01	Tanker
636011627	2261.12	10.2	25.7832	-77.1155	186.478	1818	2019-12-09 06:10:51	Cargo			636092275	5822.42	13.6	25.759	-77.082	147.905	1154	2020-07-29 12:58:32	Cargo
477598200	3098.09	10.2	25.7847	-77.1358	227.667	1005	2019-12-09 06:04:20	Cargo			538006842	5793.67	13.6	25.7583	-77.0839	149.899	930	2020-07-29 12:59:00	Passenger
566473000	4088.43	13.8	25.7672	-77.1056	169.614	1540	2019-12-10 19:24:26	Tanker			220415000	32769.4	13.1	25.8239	-77.439	274.059	614	2020-07-29 14:28:01	Cargo
375939000	1828.51	7.2	25.7882	-77.1061	158.001	5357	2019-12-23 05:03:59	Cargo			372884000	54653.5	12.3	25.8472	-77.6559	275.239	2	2020-07-29 20:18:38	Cargo
677031100	2408.68	10.3	25.7825	-77.1065	164.518	938	2019-12-09 06:13:41	Special Craft			249579000	5233.7	23.5	25.757	-77.1227	190.704	935	2020-07-30 05:50:12	Tanker
[truncated: 1,741 more rows]

## Sheet: GLM
Year	Month	Day	Hour	Number of Ships	Mean Speed	Mean Speed (SD)	Mean CPA Distance	Mean CPA Distancy (SD)	Log Mean CPA Distance	Pre / During COVID-19	Wind Speed	SPL	Day / Night
[truncated: 1,655 more rows]
